# Supplementary material for: Cyclization reactions of 1,6-dienes and 1,6-enynes by dual cobalt photocatalysis
Source: Royal Society of Chemistry journal article supplement (doi:10.1039/d4qo00311j), 2024-01-01

# **Cyclization reactions of 1,6-dienes and 1,6-enynes by dual cobalt photocatalysis**

Pei-Ting Li, Zi-Fa Shi and Wei Yu\*

*State Key Laboratory of Applied Organic Chemistry, College of Chemistry and Chemical Engineering, Lanzhou University, Lanzhou 730000, China.*

## **Supplementary Information**

### **Table of Contents**

|                                                                       |     |
|-----------------------------------------------------------------------|-----|
| 1. General information .....                                          | S2  |
| 2. Preparation of the substrates .....                                | S3  |
| 3. Synthesis and characterization of the photocatalysts.....          | S6  |
| 4. Optimization of the reaction conditions.....                       | S9  |
| 5. Experimental procedures .....                                      | S12 |
| 6. Mechanistic studies .....                                          | S13 |
| 7. Characterization Data of Products .....                            | S26 |
| 8. References.....                                                    | S54 |
| 9. Copies of <sup>1</sup> H NMR and <sup>13</sup> C NMR spectra ..... | S56 |

## 1. General information

The  $^1\text{H}$  NMR,  $^{13}\text{C}$  NMR and  $^{19}\text{F}$  NMR spectra were recorded on a Bruker AVANCE III-400 MHz, a Bruker AVANCE III HD 400 MHz, or an INOVA600 MHz spectrometer with  $\text{CDCl}_3$  or  $\text{DMSO-}d_6$  as the solvent. In  $\text{CDCl}_3$ , the chemical shifts in  $^1\text{H}$  NMR spectra were determined with  $\text{Si}(\text{CH}_3)_4$  as the internal standard ( $\delta = 0.00$  ppm); the chemical shifts in  $^{13}\text{C}$  NMR spectra were determined based on the chemical shift of  $\text{CDCl}_3$  ( $\delta = 77.00$  ppm). In  $\text{DMSO-}d_6$ , the chemical shifts in  $^1\text{H}$  NMR spectra and  $^{13}\text{C}$  NMR spectra were determined based on the chemical shift of  $\text{DMSO-}d_6$  ( $\delta = 2.50$  ppm for  $^1\text{H}$  NMR spectra and  $\delta = 39.60$  ppm for  $^{13}\text{C}$  NMR spectra, respectively). The  $^1\text{H}$  NMR splitting patterns are designated as singlet (s), doublet (d), triplet (t), quartet (q), multiplet (m) or broad (br). The high resolution mass spectra (HRMS) were measured on a Thermo Scientific ORBITRAP ELITE by ESI. Melting points (m.p.) were measured on an XT-4 melting point apparatus and are uncorrected. Luminescence quenching experiments were conducted on a RF-5301PC spectrofluorophotometer. Cyclic voltammetry data were measured at a CORRTEST potentiostat. Thin layer chromatography (TLC) analyses were performed using Merck silica gel 60 F254 plates and visualized under UV light. Flash column chromatography (FCC) was conducted on silica gel (200–300 mesh). Anhydrous acetonitrile was purchased from Energy Chemical and used without further treatment. Deuterium oxide was purchased from J&K Scientific and acetonitrile- $d_3$  was purchased from Energy Chemical. Unless otherwise noted, all other materials were obtained from commercial suppliers, and were used without further purification.

A Kessil PR 160 L blue LED lamps (427 nm, 40 W) was used as the light source, the reaction vessel is a 15 mL common glass tube (inner diameter: 1.5 cm), which was put into the reactor at the distance of about 5.0 cm from the light source. The reactor was used to keep the reaction temperature constant.

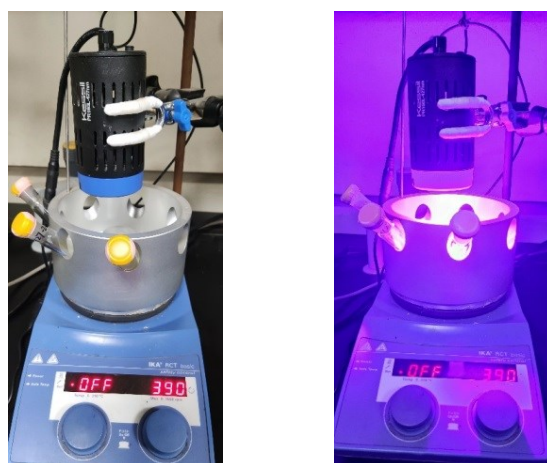

**Figure S1** The photoreaction setup.

## 2. Preparation of the substrates

### 2.1 Synthesis of **1a**<sup>1</sup>

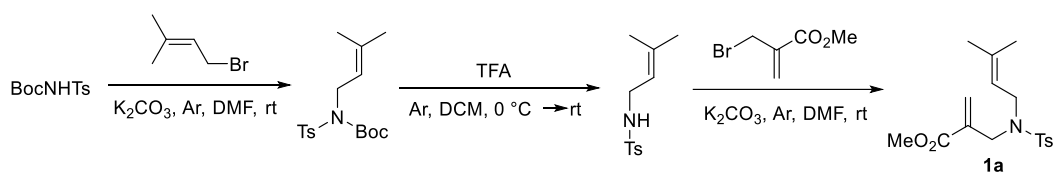

**Step 1:** To a stirred solution of *tert*-butyl tosylcarbamate (1.5 g, 5.5 mmol) and prenyl bromide (989 mg, 1.2 equiv) in DMF (15 mL) was added  $\text{K}_2\text{CO}_3$  (1.53 g, 2.0 equiv) and the mixture was stirred at room temperature for 12 h. After the reaction was complete as monitored by TLC analysis, 10 mL of water was added into the reaction mixture, and the product was extracted with ethyl acetate ( $3 \times 20$  mL). The combined organic layers were washed with brine (20 mL), dried over anhydrous  $\text{Na}_2\text{SO}_4$ , and then concentrated under reduced pressure on a rotary evaporator. The residual was treated with flash chromatography on silica gel (petroleum ether (PE)/ethyl acetate (EA) = 10/1, v/v) to give dimethyl 2-(3-methylbut-2-enyl)malonate (1.54 g, 82%) as a colorless oil.

**Step 2:** To a stirred solution of *tert*-butyl(3-methylbut-2-en-1-yl)(tosyl)carbamate (1.86 g, 5.5 mmol) in dichloromethane (DCM) (25 mL) was added trifluoroacetic acid (1.63 mL) at  $0^\circ\text{C}$ . The reaction mixture was allowed to warm up to room temperature overnight. After the reaction was complete as monitored by TLC analysis, the reaction mixture was cooled down to  $0^\circ\text{C}$  and quenched by slowly adding saturated  $\text{NaHCO}_3$  aqueous solution. The product was extracted with DCM ( $3 \times 20$  mL). The combined organic layers were washed with brine (20 mL), dried over anhydrous  $\text{Na}_2\text{SO}_4$ , and concentrated under reduced pressure on a rotary evaporator. The residual was treated with flash chromatography on silica gel (PE/EA = 5/1, v/v) to give 4-methyl-*N*-(3-methylbut-2-en-1-yl)benzenesulfonamide (0.59 g, 45%) as a colorless oil.

**Step 3:** To a stirred solution of 4-methyl-*N*-(3-methylbut-2-en-1-yl)benzenesulfonamide (700 mg, 2.9 mmol) and methyl 2-(bromomethyl)acrylate (628 mg, 1.2 equiv) in DMF (15 mL) was added  $\text{K}_2\text{CO}_3$  (807 mg, 2.0 equiv) and the mixture was stirred at room temperature for 12 h. After the reaction was complete as monitored by TLC analysis, 10 mL of water was added into the reaction mixture, and the product was extracted with EA ( $3 \times 20$  mL). The combined organic layers were washed with brine (20 mL), dried over anhydrous  $\text{Na}_2\text{SO}_4$ , and then concentrated under reduced pressure on a rotary evaporator. The residual was treated with flash chromatography on silica gel (PE/EA = 10/1, v/v) to give **1a** (798 mg, 81%) as a colorless oil.

**1a–1o, 1aa, 3b, 3o** and **3p** were prepared following the same procedure.

## 2.2 Synthesis of **1p**<sup>2</sup>

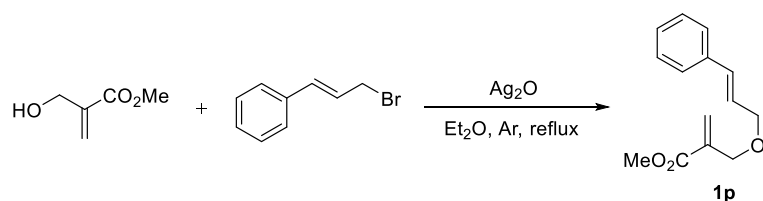

To a stirred solution of methyl 2-(hydroxymethyl)acrylate (1.50 g, 1.2 equiv) and (Z)-3-bromoprop-1-en-1-ylbenzene (2.12 g, 1.0 equiv) in  $\text{Et}_2\text{O}$  (15 mL) was added  $\text{Ag}_2\text{O}$  (5.00 g, 2.0 equiv) at room temperature. The mixture was stirred under reflux overnight. After the reaction was complete as monitored by TLC analysis, the insoluble substance was filtered off through a pad of celite, and the filtrate was concentrated under reduced pressure on a rotary evaporator. The residual was treated with flash chromatography on silica gel (PE/EA = 20/1, v/v) to give **1p** (1.06 g, 35%) as a colorless oil.

**1p**, **1q** and **1r** were prepared following the same procedure.

### Synthesis of **1u**<sup>2</sup>

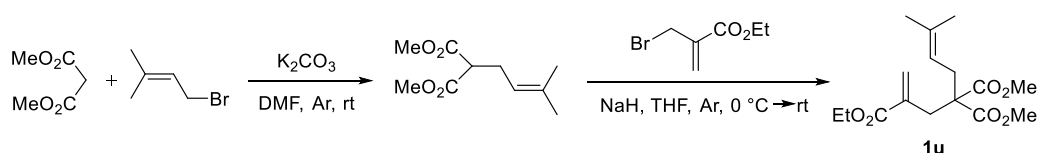

**Step 1:** To a stirred solution of dimethyl malonate (2.64 g, 20.0 mmol) and prenyl bromide (3.28 g, 1.1 equiv) in DMF (25 mL) was added  $\text{K}_2\text{CO}_3$  (3.00 g, 1.1 equiv) at room temperature. The mixture was stirred for 12 h. After the reaction was complete as monitored by TLC analysis, 10 mL of water was added into the reaction mixture, and the product was extracted with EA ( $3 \times 20$  mL). The combined organic layers were washed with brine (20 mL), dried over anhydrous  $\text{Na}_2\text{SO}_4$ , and then concentrated under reduced pressure on a rotary evaporator. The residual was treated with flash chromatography on silica gel (PE/EA = 10/1, v/v) to give dimethyl 2-(3-methylbut-2-enyl)malonate (3.08 g, 77%) as a colorless oil.

**Step 2:** To a suspension of NaH (60 % dispersion in mineral oil, 554 mg, 1.5 equiv) in dry THF (25 mL) was added slowly dimethyl 2-(3-methylbut-2-enyl)malonate (3.08 g, 15.4 mmol) at  $0\text{ }^\circ\text{C}$ . After the mixture was stirred for 1 h, ethyl 2-(bromomethyl)acrylate (3.56 g, 1.2 equiv) was added into it. The reaction mixture was stirred overnight at room temperature. After the reaction was complete as monitored by TLC analysis, 10 mL of water was added into the reaction mixture, and the product was extracted with EA ( $3 \times 20$  mL). The combined organic layers were washed with brine (20 mL), dried over anhydrous  $\text{Na}_2\text{SO}_4$ , and concentrated under reduced pressure on a rotary evaporator. The residual was treated with flash chromatography on silica gel (PE/EA = 20/1, v/v) to give **1u** (3.91 g, 81%) as a colorless oil.

**1s–1z** and **3t–3v** were prepared following the same procedure.

## 2.4 Synthesis of 3a<sup>3</sup>

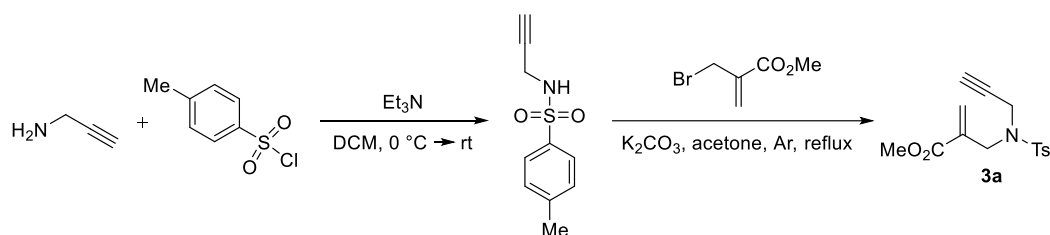

**Step 1:** To a stirred solution of prop-2-yn-1-amine (500 mg, 9.1 mmol), Et<sub>3</sub>N (3.8 mL, 3.0 equiv) in DCM (20 mL) was slowly added 4-methoxybenzenesulfonyl chloride (2.10 g, 1.2 equiv) at 0 °C. The reaction mixture was further stirred at room temperature overnight. After the reaction was complete as monitored by TLC analysis, 10 mL of water was added into the reaction mixture, and the product was extracted with EA (3 × 20 mL). The combined organic layers were washed with brine (20 mL), dried over anhydrous Na<sub>2</sub>SO<sub>4</sub>, and concentrated under reduced pressure on a rotary evaporator. The residual was treated with flash chromatography on silica gel (PE/EA = 8/1, v/v) to give 4-methyl-*N*-(prop-2-yn-1-yl)-benzenesulfonamide (1.24 g, 66%) as a white solid.

**Step 2:** To a stirred solution of the above sulfonamide 4-methyl-*N*-(prop-2-yn-1-yl)benzenesulfonamide (600 mg, 2.9 mmol) in acetone (15 mL) was added methyl 2-(bromomethyl)acrylate (0.45 mL, 1.3 equiv) and K<sub>2</sub>CO<sub>3</sub> (1.20 g, 3.0 equiv). The mixture was stirred under reflux for 10 h. After the reaction was complete as monitored by TLC analysis, 10 mL of water was added into the reaction mixture, and the product was extracted with DCM (3 × 20 mL). The combined organic layers were washed with brine (20 mL), dried over anhydrous Na<sub>2</sub>SO<sub>4</sub>, and concentrated under reduced pressure on a rotary evaporator. The residual was treated with flash chromatography on silica gel (PE/EA) = 5/1, v/v) to give **3a** (871 mg, 99%) as a white solid.

## 2.5 Synthesis of 3c<sup>4</sup>

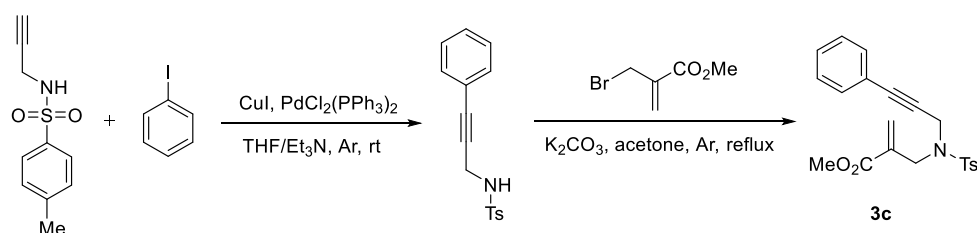

**Step 1:** To a stirred solution of 4-methyl-*N*-(prop-2-yn-1-yl)benzenesulfonamide (837 mg, 4.0 mmol) and iodobenzene (979 mg, 1.2 equiv) in THF-Et<sub>3</sub>N (15 mL, THF/Et<sub>3</sub>N = 1:1, v/v) was added PdCl<sub>2</sub>(PPh<sub>3</sub>)<sub>2</sub> (56 mg, 0.02 equiv) and CuI (30 mg, 0.04 equiv). The reaction mixture was stirred at room temperature overnight under an argon atmosphere. After the reaction was complete as monitored by TLC analysis, 10 mL of water was added into the reaction mixture, and the product was extracted with DCM

(3 × 20 mL). The combined organic layers were washed with brine (20 mL), dried over anhydrous Na<sub>2</sub>SO<sub>4</sub>, and concentrated under reduced pressure on a rotary evaporator. The residual was treated with flash chromatography on silica gel (PE/EA = 5/1, v/v) to give 4-methyl-*N*-(3-phenylprop-2-yn-1-yl)benzenesulfonamide (684 mg, 60%) as a white solid.

**3c** was prepared from 4-methyl-*N*-(3-phenylprop-2-yn-1-yl)benzenesulfonamide in the same way as that for step 2 in the synthesis of **3a** (800 mg, 87%).

**3c–3n, 3q–3s** and **3w** were prepared following the same procedure.

### 3. Synthesis and characterization of the photocatalysts

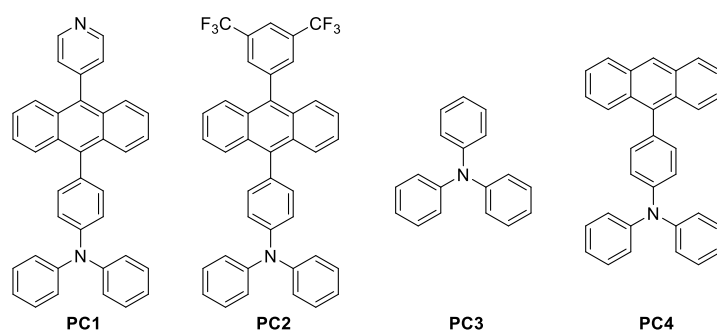

#### 3.1 Synthesis of the photocatalysts

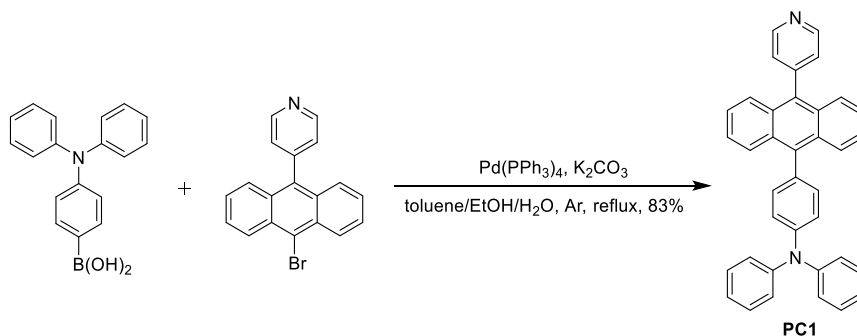

To a stirred solution of (4-(diphenylamino)phenyl)boronic acid (1.25 g, 1.2 equiv), 4-(10-bromoanthracen-9-yl)pyridine (1.20 g, 3.6 mmol) and Pd(PPh<sub>3</sub>)<sub>4</sub> (208 mg, 0.05 equiv) in toluene/EtOH/H<sub>2</sub>O (20 mL/10 mL/5 mL) was added K<sub>2</sub>CO<sub>3</sub> (1.99 g, 4.0 equiv). The mixture was stirred under reflux for 10 h. After the reaction was complete as monitored by TLC analysis, the reaction mixture was cooled to room temperature and diluted with H<sub>2</sub>O (20 mL). The product was extracted with DCM (3 × 20 mL). The combined organic layers were washed with brine (20 mL), dried over anhydrous Na<sub>2</sub>SO<sub>4</sub>, and concentrated under reduced pressure on a rotary evaporator. The crude product was purified by flash chromatography on silica gel (PE/EA = 3/1, v/v) to give **PC1**<sup>5</sup> as a yellow solid (1.50 g, 83%). mp 288–289 °C. <sup>1</sup>H NMR (600 MHz, CDCl<sub>3</sub>) δ 8.88–8.86 (m, 2H), 7.89–7.86 (m, 2H), 7.60–7.58 (m, 2H), 7.47–7.45 (m, 2H), 7.43–7.38 (m, 4H), 7.36–7.33 (m, 4H), 7.32–7.25 (m, 8H), 7.11–7.08 (m, 2H); <sup>13</sup>C NMR

(125 MHz, CDCl<sub>3</sub>) δ 149.9, 148.0, 147.7, 147.3, 138.2, 133.4, 132.0, 131.9, 129.9, 129.4, 129.1, 127.3, 126.6, 126.0, 125.7, 125.1, 124.7, 123.2, 122.9. HRMS (ESI): *m/z* calcd for C<sub>37</sub>H<sub>27</sub>N<sub>2</sub> [M+H]<sup>+</sup> 499.2169, found 499.2171.

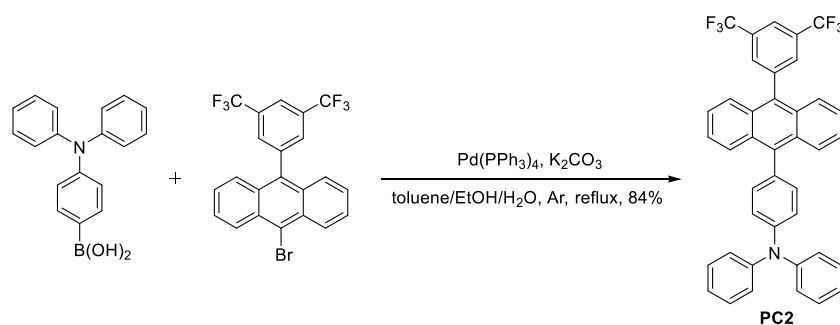

**PC2** was prepared following the same procedure of **PC1**. **PC2** was obtained as a yellow solid (1.50 g, 84%). mp 235–236 °C. <sup>1</sup>H NMR (600 MHz, CDCl<sub>3</sub>) δ 8.11 (s, 1H), 7.98–7.97 (m, 2H), 7.91–7.89 (m, 2H), 7.50–7.48 (m, 2H), 7.42–7.39 (m, 4H), 7.34–7.26 (m, 12H), 7.08–7.06 (m, 2H); <sup>13</sup>C NMR (125 MHz, CDCl<sub>3</sub>) δ 147.7, 147.4, 141.7, 138.7, 132.5 (d, *J*<sub>C-F</sub> = 54.7 Hz), 132.0, 131.9, 131.6 (d, *J*<sub>C-F</sub> = 3.2 Hz), 129.9 (d, *J*<sub>C-F</sub> = 26.6 Hz), 129.4, 127.5, 126.1, 125.7, 125.2, 124.8, 123.2, 122.9, 122.1, 123.4 (q, *J*<sub>C-F</sub> = 271.2 Hz), 121.7 (q, *J*<sub>C-F</sub> = 11.3 Hz); <sup>19</sup>F NMR (376 MHz, CDCl<sub>3</sub>) δ -62.6. HRMS (ESI): *m/z* calcd for C<sub>40</sub>H<sub>26</sub>F<sub>6</sub>N [M+H]<sup>+</sup> 634.1964, found 634.1961.

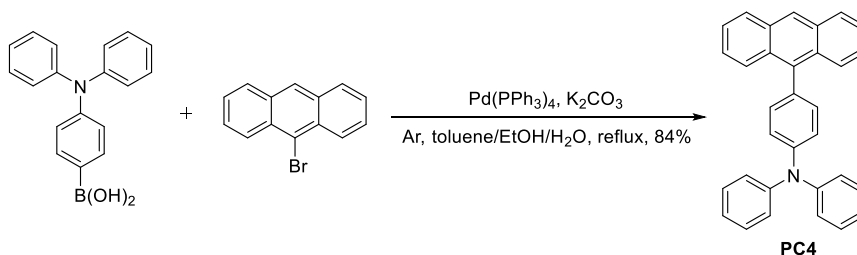

**PC4** was prepared according to method in the literature.<sup>6</sup> **PC4** was obtained as a yellow solid (493 mg, 84%). mp 209–211 °C. <sup>1</sup>H NMR (400 MHz, CDCl<sub>3</sub>) δ 8.49 (s, 1H), 8.05 (d, *J* = 8.4 Hz, 2H), 7.83 (d, *J* = 8.8 Hz, 2H), 7.50–7.46 (m, 2H), 7.43–7.39 (m, 2H), 7.37–7.32 (m, 4H), 7.31–7.26 (m, 8H), 7.11–7.07 (m, 2H). <sup>13</sup>C NMR (101 MHz, CDCl<sub>3</sub>) δ 147.8, 147.1, 136.9, 132.4, 132.0, 131.4, 130.4, 129.4, 128.3, 126.9, 126.4, 125.3, 125.1, 124.6, 123.1, 123.0. HRMS (ESI): *m/z* calcd for C<sub>32</sub>H<sub>24</sub>N [M+H]<sup>+</sup> 422.1903, found 422.1907.

### 3.2 Characterization of photocatalysts

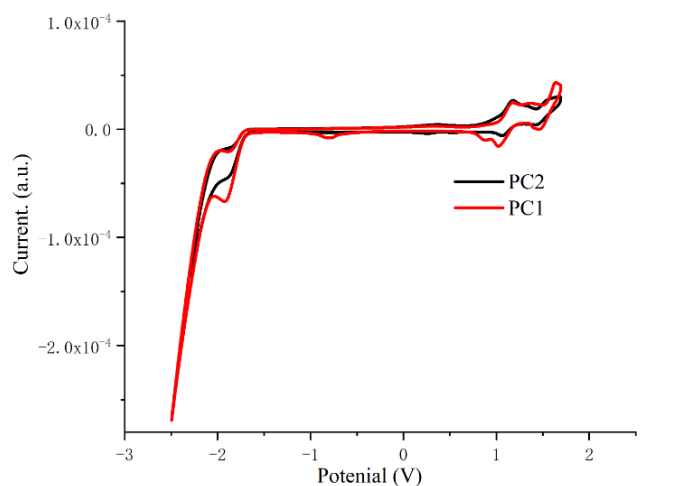

**Figure S2** Cyclic voltammograms measurements were performed with the three-electrode CORRTEST electrochemical workstation by using a glassy carbon working electrode, a platinum wire counter electrode and a saturated calomel as reference electrode. The voltammograms were taken in a degassed DCM solution ( $[n\text{-Bu}_4\text{NBF}_4] = 0.1 \text{ M}$ ,  $\text{PC} = 1 \text{ mM}$ . The scan rate was  $0.1 \text{ V/s}$ .

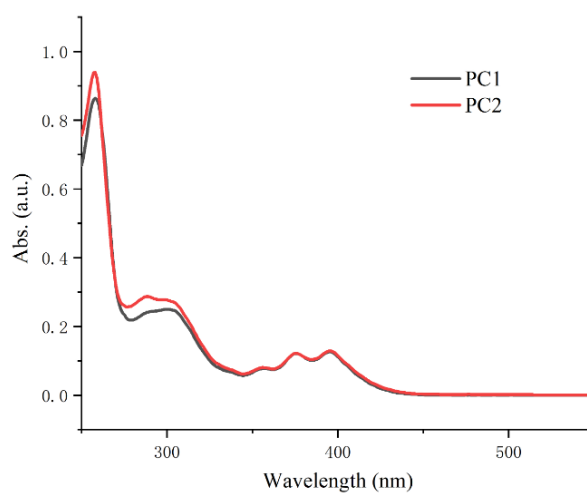

**Figure S3** UV-vis spectrum of **PC1** and **PC2** in DCM solution ( $1 \times 10^{-5} \text{ M}$ ).

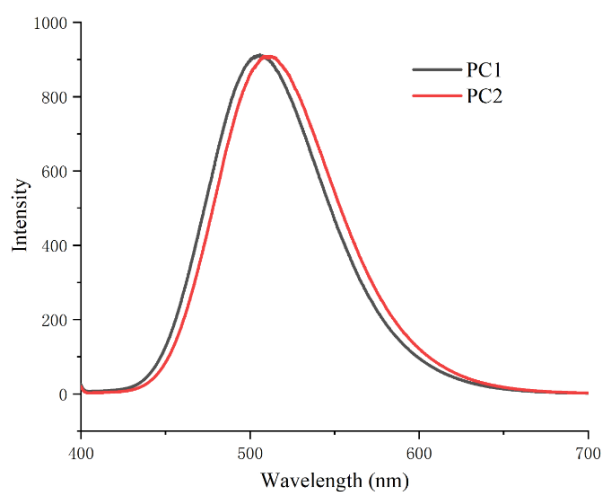

**Figure S4** Emission spectra of **PC1** and **PC2** in DCM solution ( $1 \times 10^{-5} \text{ M}$ ).



The ground state reduction and oxidation potential of **PC** are determined according to the reported method.<sup>7,8</sup>  $E_{1/2}(\mathbf{PC1}/\mathbf{PC1}^{\bullet-}) = -1.95$  V vs. SCE;  $E_{1/2}(\mathbf{PC1}^{\bullet+}/\mathbf{PC1}) = +1.10$  V vs. SCE.  $E_{1/2}(\mathbf{PC2}/\mathbf{PC2}^{\bullet-}) = -1.93$  V vs. SCE;  $E_{1/2}(\mathbf{PC2}^{\bullet+}/\mathbf{PC2}) = +1.12$  V vs. SCE. Excited state oxidation and reduction potentials were calculated by the following formulas:<sup>7</sup>

$$E_{1/2}(\mathbf{PC}^*/\mathbf{PC}^{\bullet-}) = E_{1/2}(\mathbf{PC}/\mathbf{PC}^{\bullet-}) + E_{0,0}$$

$$E_{1/2}(\mathbf{PC}^{\bullet+}/\mathbf{PC}^*) = E_{1/2}(\mathbf{PC}^{\bullet+}/\mathbf{PC}) - E_{0,0}$$

#### 4. Optimization of the reaction conditions

**Table S1** Effect of base

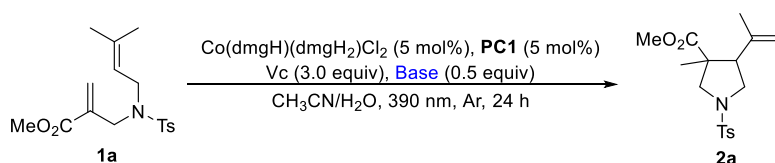

| Entry | Base                            | Yield (%)          |
|-------|---------------------------------|--------------------|
| 1     | K <sub>2</sub> CO <sub>3</sub>  | 47                 |
| 2     | K <sub>3</sub> PO <sub>4</sub>  | 39                 |
| 3     | Cs <sub>2</sub> CO <sub>3</sub> | 40                 |
| 4     | C <sub>5</sub> F                | trace <sup>a</sup> |
| 5     | KH <sub>2</sub> PO <sub>4</sub> | N.R.               |
| 6     | Na <sub>2</sub> CO <sub>3</sub> | 35                 |
| 7     | K <sub>2</sub> CO <sub>3</sub>  | 57 <sup>b</sup>    |

The reaction was conducted on 0.2 mmol scale in CH<sub>3</sub>CN (3.0 mL) and H<sub>2</sub>O (0.5 mL) with 40 W 390 nm Kessil LED as the light source. System temperature of 30 °C. Isolated yield. N.R. = no reaction. <sup>a</sup>**1a** decomposed. <sup>b</sup>K<sub>2</sub>CO<sub>3</sub> (1.5 equiv).

**Table S2** Effect of light source

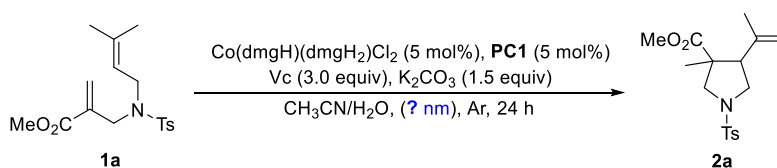

| Entry | Light source | Yield (%)         |
|-------|--------------|-------------------|
| 1     | 390          | 57 <sup>a</sup>   |
| 2     | 390          | 63 <sup>b</sup>   |
| 3     | 455          | N.R. <sup>c</sup> |
| 4     | 427          | 91 <sup>d</sup>   |
| 5     | 427          | N.R. <sup>e</sup> |
| 6     | 427          | 70 <sup>f</sup>   |

The reaction was conducted on 0.2 mmol scale in CH<sub>3</sub>CN (3.0 mL) and H<sub>2</sub>O (0.5 mL). System

temperature of 30 °C. Isolated yield. <sup>a</sup>40 W 390 nm Kessil LED as the light source. <sup>b</sup>40 W 390 nm Kessil LED as the light source. System temperature of 50 °C. <sup>c</sup>18 W 455 nm blue LEDs. <sup>d</sup>40 W 427 nm Kessil LED as the light source. System temperature of 50 °C. <sup>e</sup>Vc (2.0 equiv), K<sub>2</sub>CO<sub>3</sub> (1.5 equiv). <sup>f</sup>Vc (2.0 equiv), K<sub>2</sub>CO<sub>3</sub> (1.0 equiv).

**Table S3** The effect of cobalt catalyst

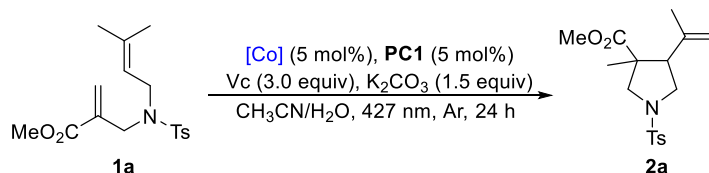

| Entry | [Co]                                        | Yield (%)         |
|-------|---------------------------------------------|-------------------|
| 1     | Co(dmgh)(dmgh <sub>2</sub> )Cl <sub>2</sub> | 91                |
| 2     | Co(acac) <sub>2</sub>                       | N.R.              |
| 3     | CoBr <sub>2</sub>                           | N.R.              |
| 4     | Salen Co-1                                  | 81                |
| 5     | Salen Co-2                                  | 38                |
| 6     | Co(dmgh) <sub>2</sub> <sup>f</sup> BuPyBr   | N.R. <sup>a</sup> |

The reaction was conducted on 0.2 mmol scale in CH<sub>3</sub>CN (3.0 mL) and H<sub>2</sub>O (0.5 mL) with a 40 W 427 nm Kessil LED as the light source. System temperature of 50 °C. Isolated yield. <sup>a</sup>In the absence of PC1.

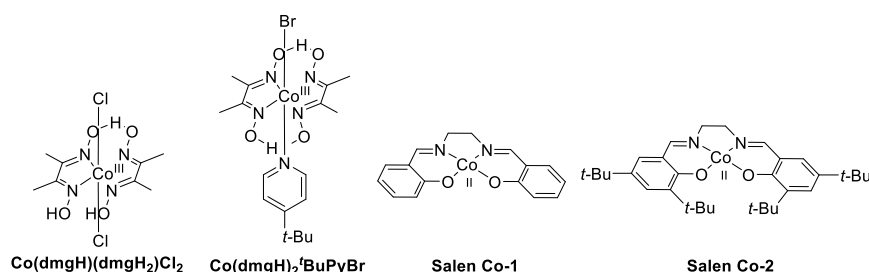

**Table S4** Effect of PC

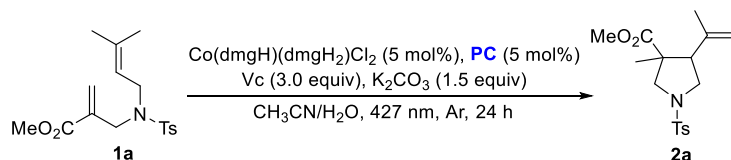

| Entry | PC (5 mol%) | Yield (%) |
|-------|-------------|-----------|
| 1     | PC1         | 91        |
| 2     | PC2         | 90        |
| 3     | PC3         | N.R.      |
| 4     | PC4         | 53        |

The reaction was conducted on 0.2 mmol scale in CH<sub>3</sub>CN (3.0 mL) and H<sub>2</sub>O (0.5 mL) with a 40 W 427 nm Kessil LED as the light source. System temperature of 50 °C. Isolated yield.

**Table S5** Effect of solvent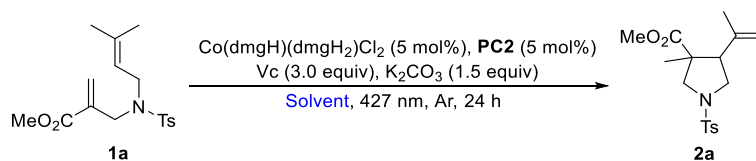

| Entry | Solvent                                   | Yield (%)          |
|-------|-------------------------------------------|--------------------|
| 1     | $\text{CH}_3\text{CN}/\text{H}_2\text{O}$ | 91                 |
| 2     | $\text{DCM}/\text{H}_2\text{O}$           | trace <sup>a</sup> |
| 3     | $\text{DCE}/\text{H}_2\text{O}$           | trace <sup>a</sup> |
| 4     | $\text{THF}/\text{H}_2\text{O}$           | 68                 |
| 5     | $\text{PhCH}_3/\text{H}_2\text{O}$        | N.R.               |
| 6     | $\text{EtOH}/\text{H}_2\text{O}$          | 34                 |
| 7     | $\text{CH}_3\text{CN}/\text{H}_2\text{O}$ | 80 <sup>b</sup>    |
| 8     | $\text{CH}_3\text{CN}$                    | 81                 |

The reaction was conducted on 0.2 mmol scale in  $\text{CH}_3\text{CN}$  (3.0 mL) and  $\text{H}_2\text{O}$  (0.5 mL) with a 40 W 427 nm Kessil LED light. System temperature of 50 °C. Isolated yield. <sup>a</sup>**1a** decomposed. <sup>b</sup> $\text{CH}_3\text{CN}$  = 2.0 mL.

**Table S6** The effect of reductant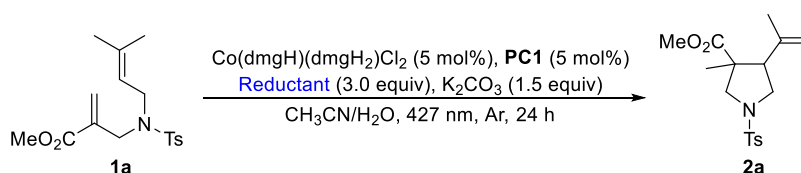

| Entry | Reductant                     | Yield (%)           |
|-------|-------------------------------|---------------------|
| 1     | <b>Vc</b>                     | 91                  |
| 2     | <b>VcNa</b>                   | N.R. <sup>a</sup>   |
| 3     | <i>i</i> -Pr <sub>2</sub> NEt | 96 <sup>a,b</sup>   |
| 4     | <i>i</i> -Pr <sub>2</sub> NEt | 80 <sup>a,b,c</sup> |

The reaction was conducted on 0.2 mmol scale in  $\text{CH}_3\text{CN}$  (3.0 mL) and  $\text{H}_2\text{O}$  (0.5 mL) with a 40 W 427 nm Kessil LED as the light source. System temperature of 50 °C. Isolated yield. <sup>a</sup>In the absence of  $\text{K}_2\text{CO}_3$ , <sup>b</sup> $\text{CH}_3\text{CN}$  = 3.0 mL. <sup>c</sup>System temperature of 30 °C.

**Table S7** The effect of *i*-Pr<sub>2</sub>NEt/ $\text{Co}(\text{dmgH})(\text{dmgH}_2)\text{Cl}_2$ /**PC1** equivalent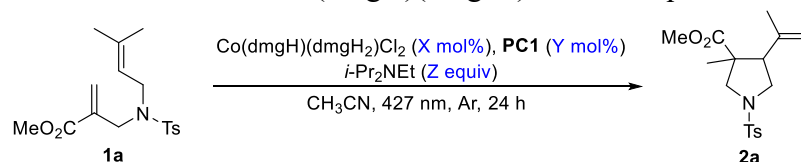

| Entry | [Co] (X mol%) | <b>PC1</b> (Y mol%) | <i>i</i> -Pr <sub>2</sub> NEt (Z equiv) | Yield (%) |
|-------|---------------|---------------------|-----------------------------------------|-----------|
| 1     | 5             | 5                   | 3                                       | 96        |
| 2     | 5             | 5                   | 0.5                                     | 83        |

|   |   |   |     |    |
|---|---|---|-----|----|
| 3 | 5 | 5 | 1.5 | 94 |
| 4 | 3 | 5 | 3   | 84 |
| 5 | 5 | 3 | 3   | 86 |

The reaction was conducted on 0.2 mmol scale in CH<sub>3</sub>CN (3.0 mL) and H<sub>2</sub>O (0.5 mL) with a 40 W 427 nm Kessil LED as the light source. System temperature of 50 °C. Isolated yield.

**Table S8** Control experiments

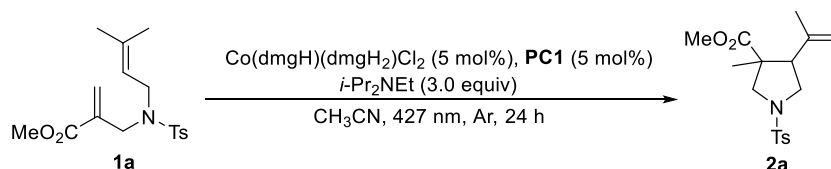

| Entry | Variation                                           | Yield (%) |
|-------|-----------------------------------------------------|-----------|
| 1     | without Co(dmgh)(dmgh <sub>2</sub> )Cl <sub>2</sub> | N.R.      |
| 2     | without <i>i</i> -Pr <sub>2</sub> NEt               | N.R.      |
| 3     | without <b>PC1</b>                                  | N.R.      |
| 4     | without Ar                                          | N.R.      |
| 5     | without light                                       | N.R.      |

The reaction was conducted on 0.2 mmol scale with a 40 W 427 nm Kessil LED as the light source. System temperature of 50 °C. Isolated yield.

## 5. Experimental procedures

### 5.1 General procedure for the preparation of 2 (Protocol A)

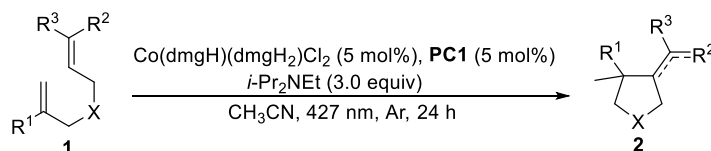

**1** (0.2 mmol) was added into a 15 mL oven-dried glass tube equipped with a magnetic stirring bar and a rubber stopper, followed by the addition of Co(dmgh)(dmgh<sub>2</sub>)Cl<sub>2</sub> (0.01 mmol, 5 mol%), **PC1** (0.01 mmol, 5 mol%) and acetonitrile (3.0 mL). The tube was evacuated and backfilled with argon (repeated three times). *i*-Pr<sub>2</sub>NEt (0.6 mmol, 3.0 equiv) was added into the reaction mixture, which was irradiated with a 40 W 427 nm Kessil light at 50 °C (system temperature) for 24 h. After the reaction was complete as monitored by TLC, the solvent was removed under reduced pressure with a rotatory evaporator. The residual was treated with flash chromatography on silica gel (eluted with PE and EA) to afford product **2**.

## 5.2 General procedure for the preparation of 4 (Protocol B)

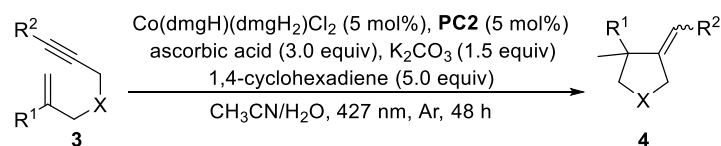

**3** (0.2 mmol) was added into a 15 mL oven-dried glass tube equipped with a magnetic stirring bar and a rubber stopper, followed by the addition of Co(dmgh)(dmgh<sub>2</sub>)Cl<sub>2</sub> (0.01 mmol, 5 mol%), **PC2** (0.01 mmol, 5 mol%), ascorbic acid (0.6 mmol, 3.0 equiv), K<sub>2</sub>CO<sub>3</sub> (0.3 mmol, 1.5 equiv), acetonitrile (3.0 mL) and deionized water (0.5 mL). The tube was evacuated and backfilled with argon (repeated three times). 1,4-Cyclohexadiene (1.0 mmol, 5.0 equiv) was added into the reaction mixture, which was irradiated with a 40 W 427 nm Kessil light at 50 °C (system temperature) for 48 h. After the reaction was complete as monitored by TLC the solvent was removed under reduced pressure with a rotatory evaporator. The residual was treated with flash chromatography on silica gel (eluted with PE and EA) to afford product **4**.

## 6. Mechanistic studies

### 6.1 Inhibition experiment for 1,6-diene cycloisomerization

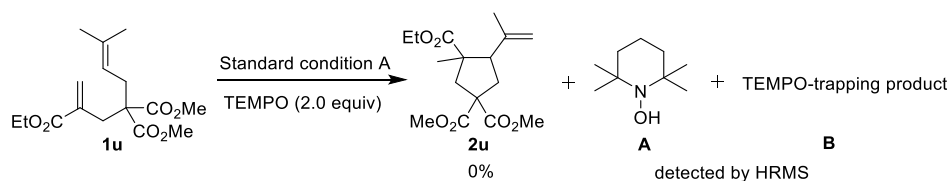

**1u** (62.5 mg, 0.2 mmol) was added into a 15 mL oven-dried glass tube equipped with a magnetic stirring bar and a rubber stopper, followed by the addition of Co(dmgh)(dmgh<sub>2</sub>)Cl<sub>2</sub> (3.6 mg, 0.01 mmol, 5 mol%), **PC1** (5.0 mg, 0.01 mmol, 5 mol%), TEMPO (62.5 mg, 0.4 mmol, 2.0 equiv) and acetonitrile (3.0 mL). The tube was evacuated and backfilled with argon (repeated three times). *i*-Pr<sub>2</sub>NEt (105 μL, 0.6 mmol, 3.0 equiv) was added into the reaction mixture, which was irradiated with a 40 W 427 nm Kessil light at 50 °C (system temperature) for 24 h. The formation of **2u** was completely inhibited with the addition of a radical scavenger (TEMPO). TEMPO-trapping product (**B**) was detected by HRMS (Figure S5). This result indicates that the cycloisomerization of 1,6-dienes proceeded through a radical process.

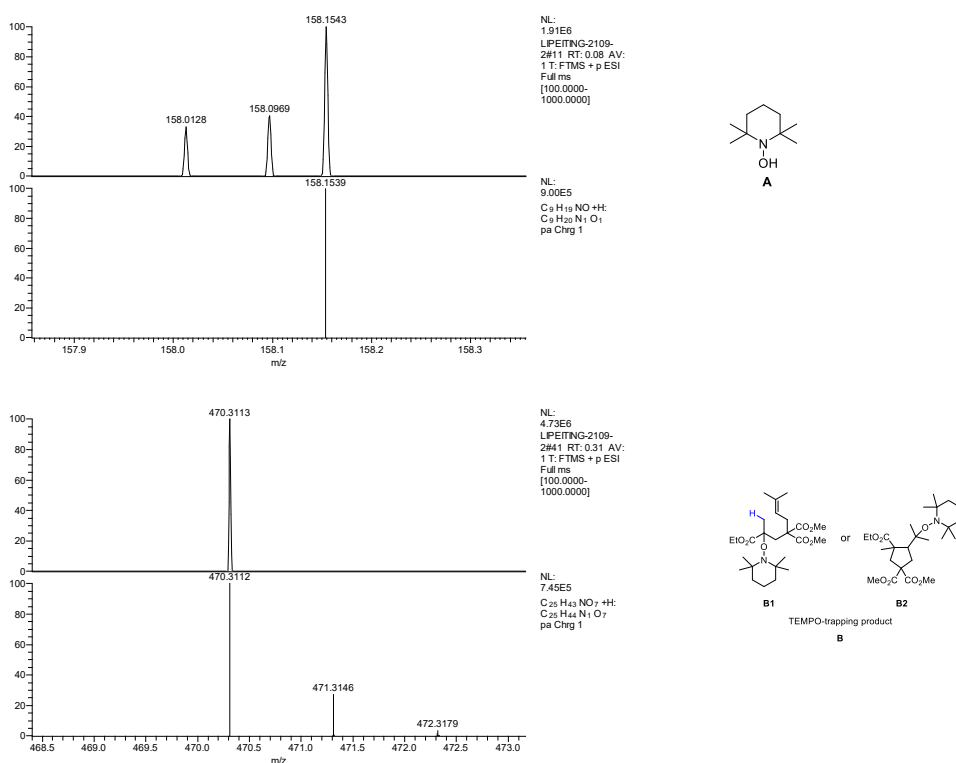

**Figure S5** The HRMS of 1,6-diene cycloisomerization trapping experiments.

## 6.2 Inhibition experiment for 1,6-enyne cyclization

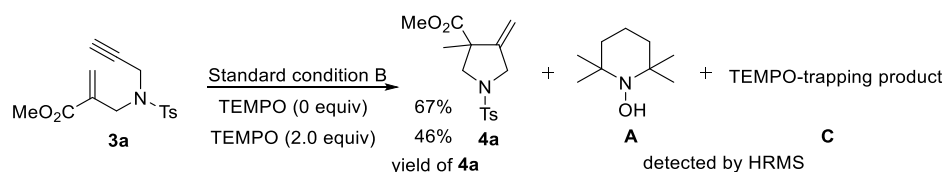

**3a** (61.5 mg, 0.2 mmol) was added into a 15 mL oven-dried glass tube equipped with a magnetic stirring bar and a rubber stopper, followed by the addition of Co(dmgh)(dmgh<sub>2</sub>)Cl<sub>2</sub> (3.6 mg, 0.01 mmol, 5 mol%), **PC2** (6.3 mg, 0.01 mmol, 5 mol%), ascorbic acid (105.6 mg, 0.6 mmol, 3.0 equiv), K<sub>2</sub>CO<sub>3</sub> (41.46 mg, 0.3 mmol, 1.5 equiv), TEMPO (62.5 mg, 0.4 mmol, 2.0 equiv), acetonitrile (3.0 mL) and deionized water (0.5 mL). The tube was evacuated and backfilled with argon (repeated three times). 1,4-Cyclohexadiene (95  $\mu$ L, 1.0 mmol, 5.0 equiv) was added into the reaction mixture, which was irradiated with a 40 W 427 nm Kessil light at 50 °C (system temperature) for 48 h. **4a** was obtained in a yield of 46% (28 mg) after flash chromatography. TEMPO-trapping products (**C**) were detected by HRMS (Figure S6).

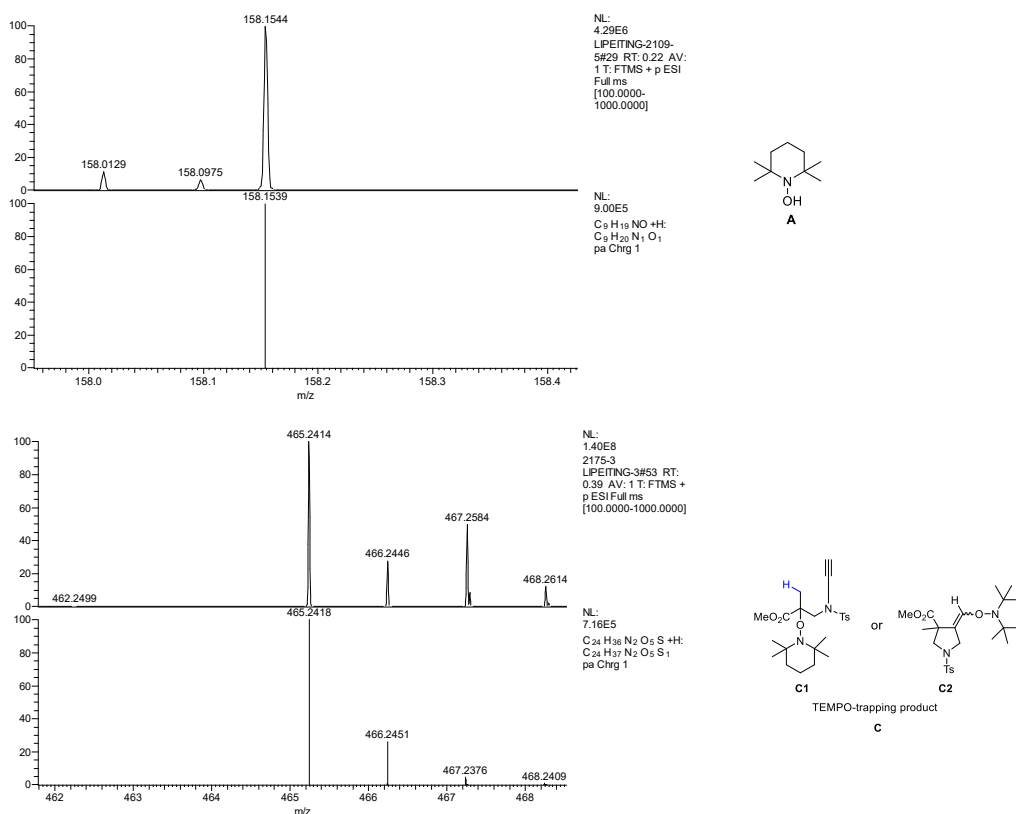

Figure S6 The HRMS of 1,6-enyne cyclization trapping experiments.

### 6.3 Deuterium labeling experiments for 1,6-diene cycloisomerization

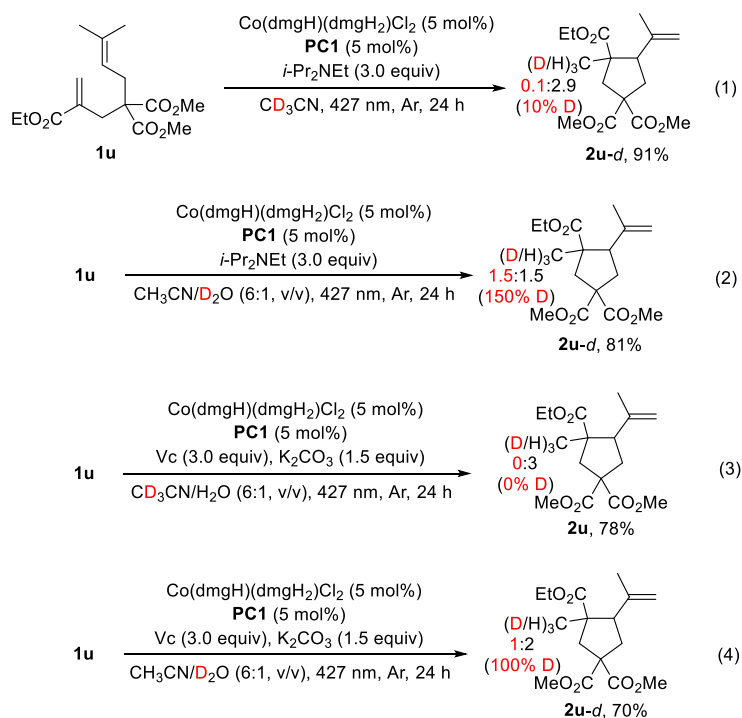

Scheme S1 Deuterium labeling experiments for the cycloisomerization of **1u**.

# <sup>1</sup>H NMR spectra

<sup>1</sup>H NMR (CDCl<sub>3</sub>, 400 MHz) (Scheme S1 (1), in CD<sub>3</sub>CN)

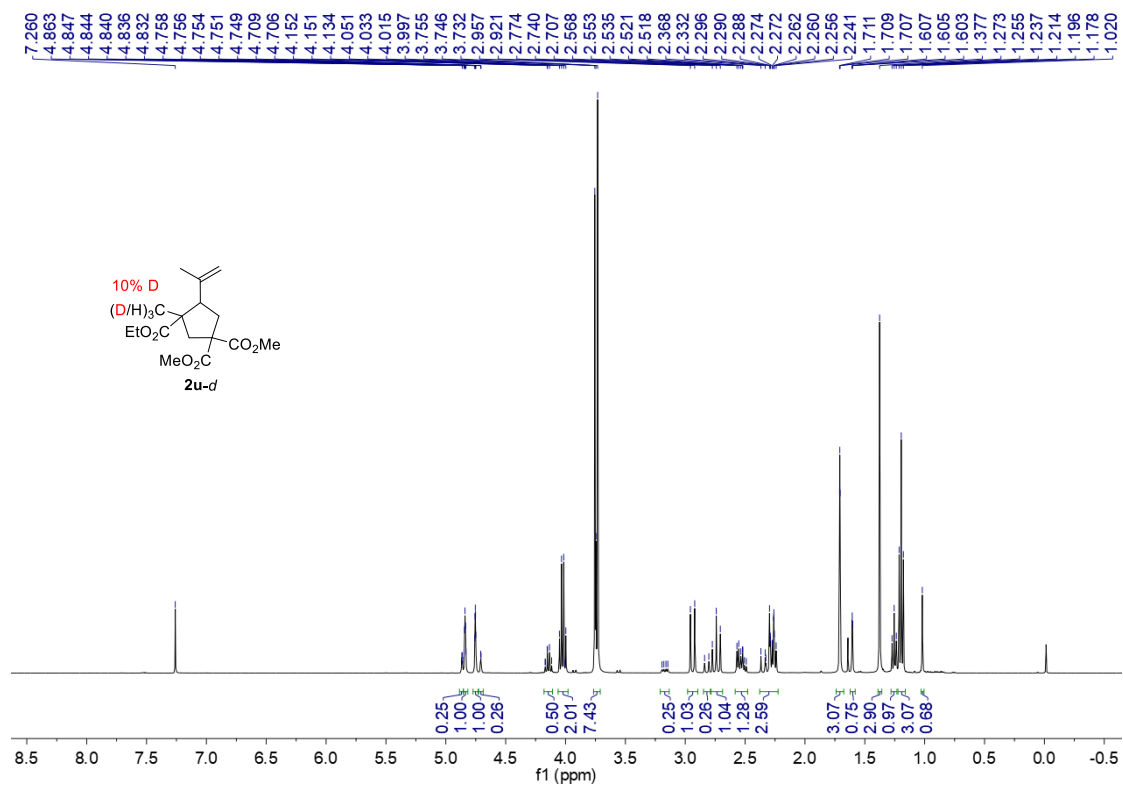

<sup>1</sup>H NMR (CDCl<sub>3</sub>, 400 MHz) (Scheme S1 (2), in CH<sub>3</sub>CN-D<sub>2</sub>O)

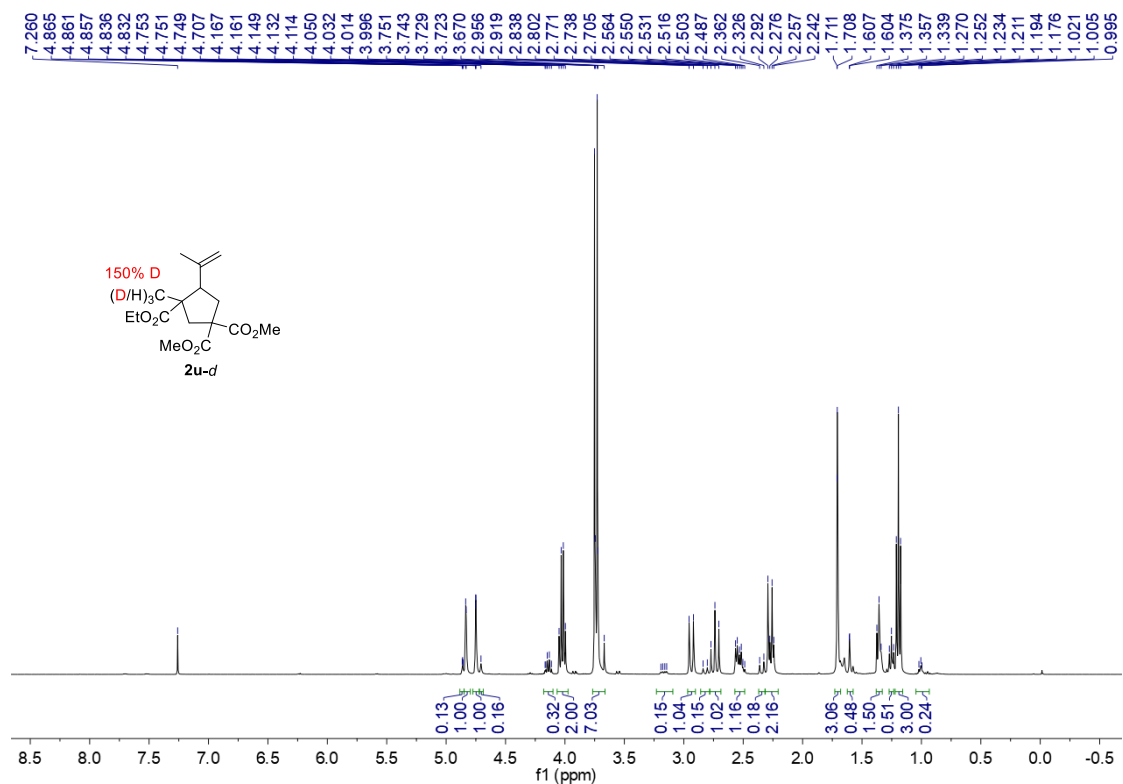



$^1\text{H}$  NMR ( $\text{CDCl}_3$ , 400 MHz) (Scheme S1 (3), in  $\text{CD}_3\text{CN}-\text{H}_2\text{O}$ )

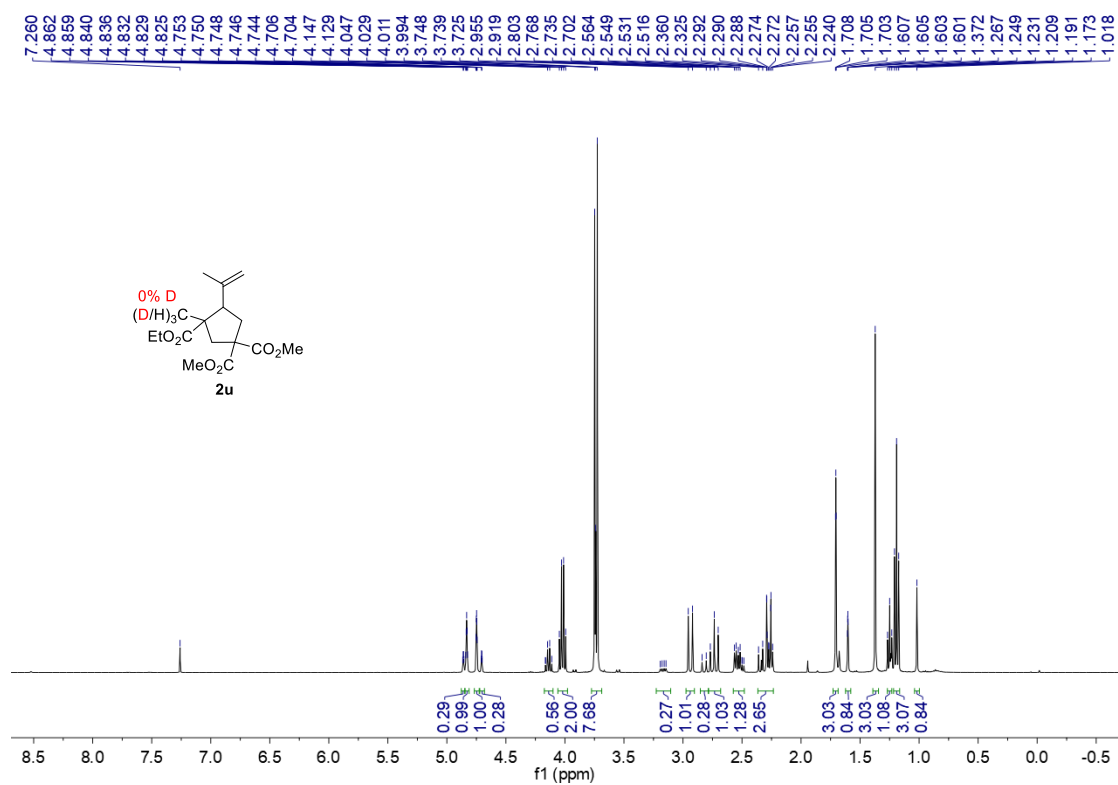

$^1\text{H}$  NMR ( $\text{CDCl}_3$ , 400 MHz) (Scheme S1 (4), in  $\text{CH}_3\text{CN}-\text{D}_2\text{O}$ )

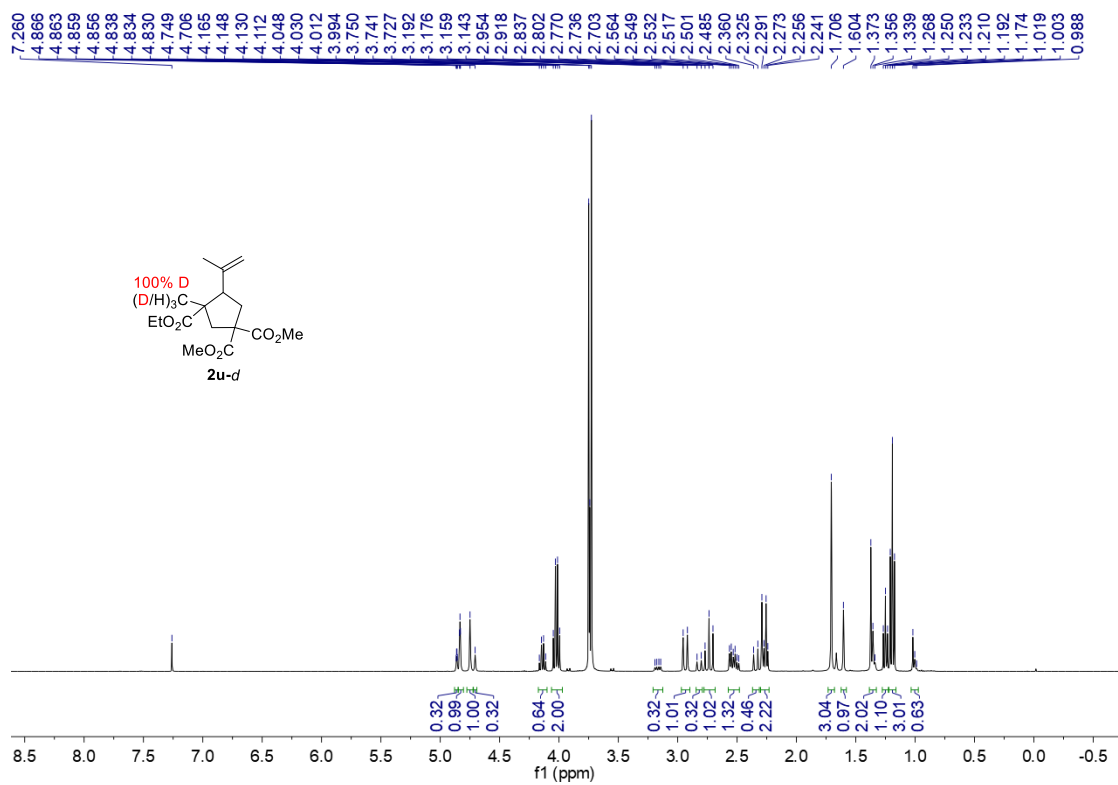

## 6.4 Deuterium labeling experiments for 1,6-enyne cyclization

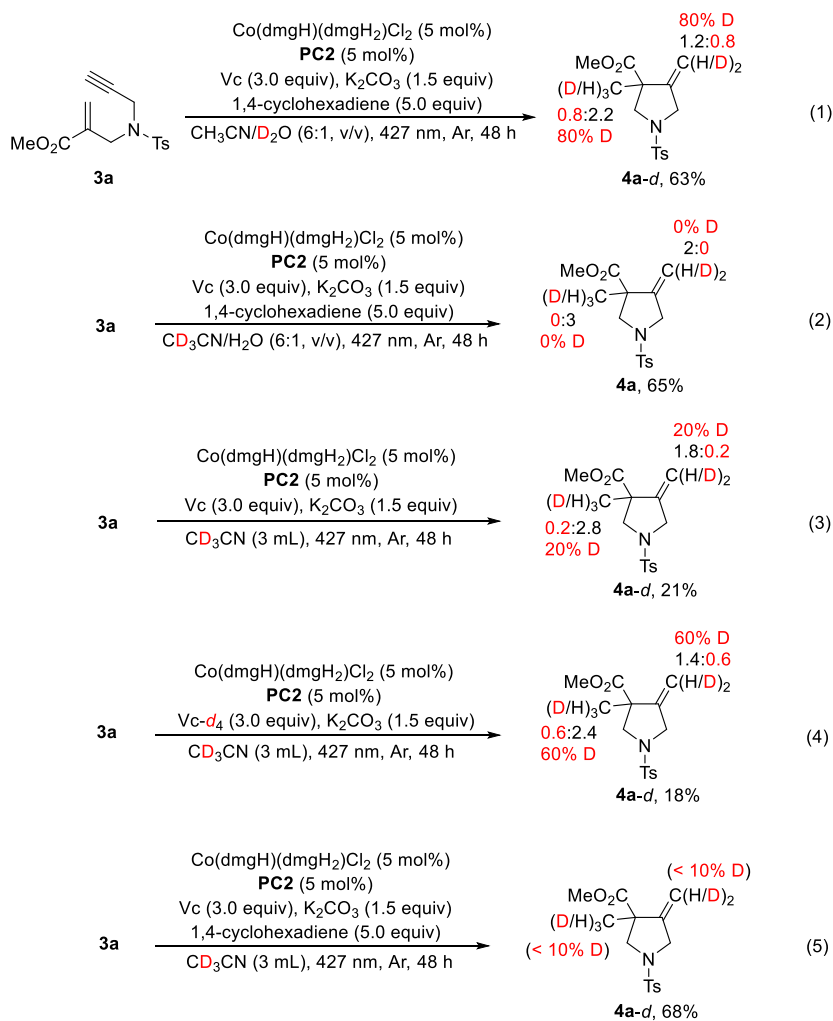

Scheme S2 Deuterium labeling experiments for the cyclization of **3a**.

# $^1\text{H}$ NMR spectra

$^1\text{H}$  NMR ( $\text{CDCl}_3$ , 400 MHz) (Scheme S2 (1), in  $\text{CH}_3\text{CN}-\text{D}_2\text{O}$ )

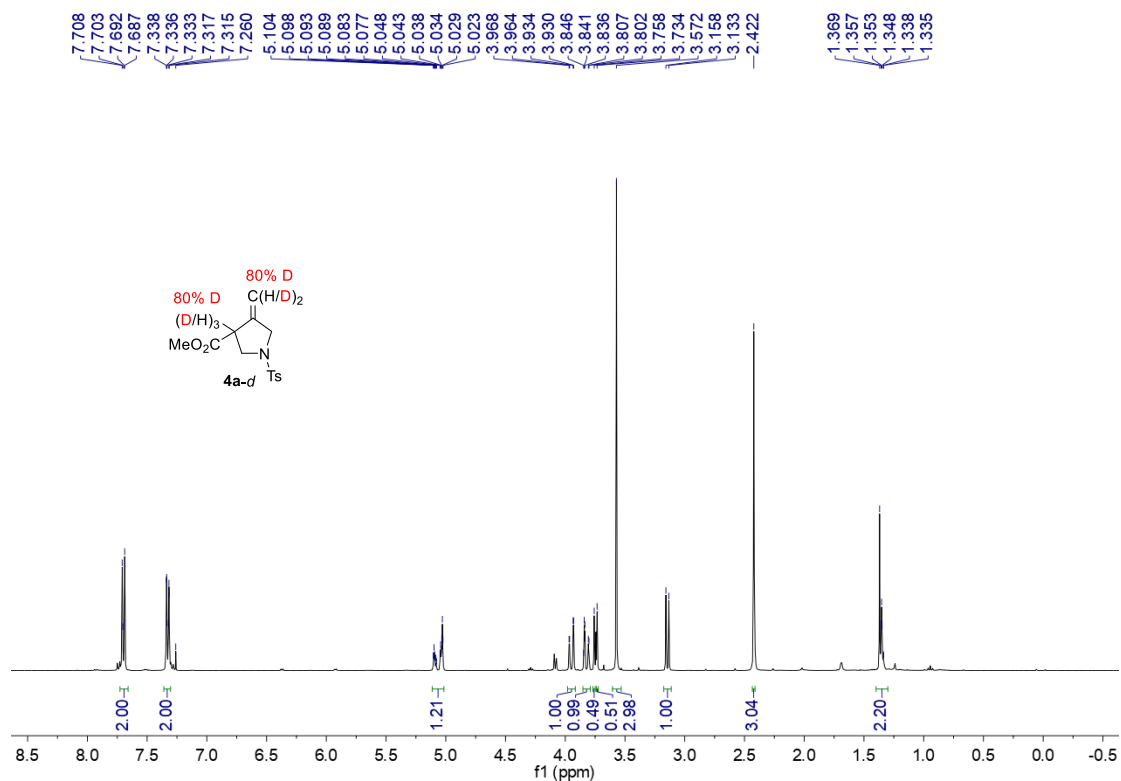

$^1\text{H}$  NMR ( $\text{CDCl}_3$ , 400 MHz) (Scheme S2 (2), in  $\text{CD}_3\text{CN}-\text{H}_2\text{O}$ )

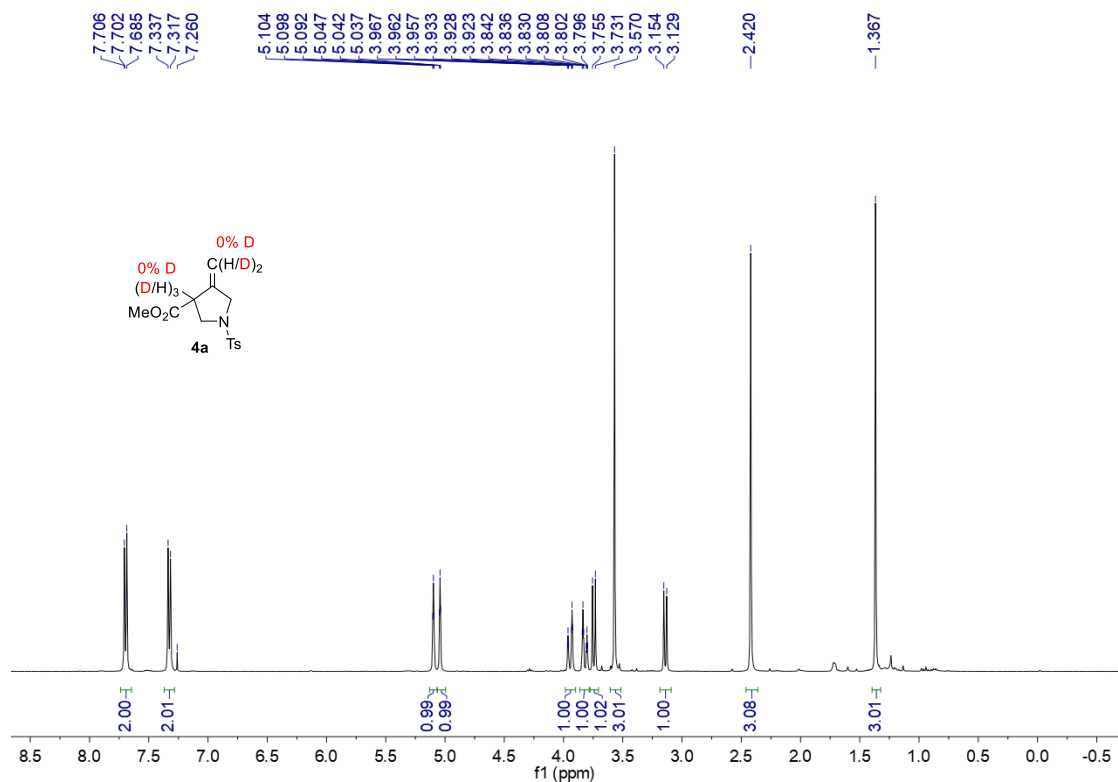

$^1\text{H}$  NMR ( $\text{CDCl}_3$ , 400 MHz) (Scheme S2 (3), in  $\text{CD}_3\text{CN}$  in the absence of 1,4-cyclohexadiene)

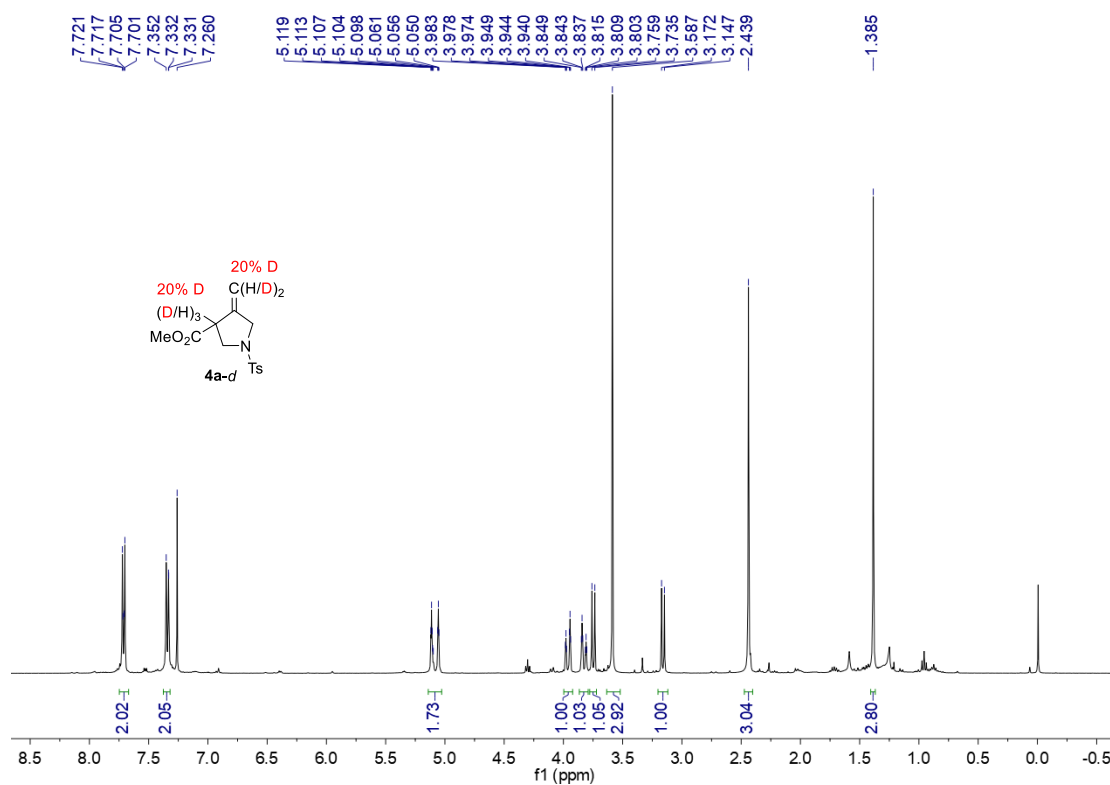

$^1\text{H}$  NMR ( $\text{CDCl}_3$ , 400 MHz) (Scheme S2 (4), in  $\text{CD}_3\text{CN}$  with  $\text{Vc-d}_4$  in the absence of 1,4-cyclohexadiene)

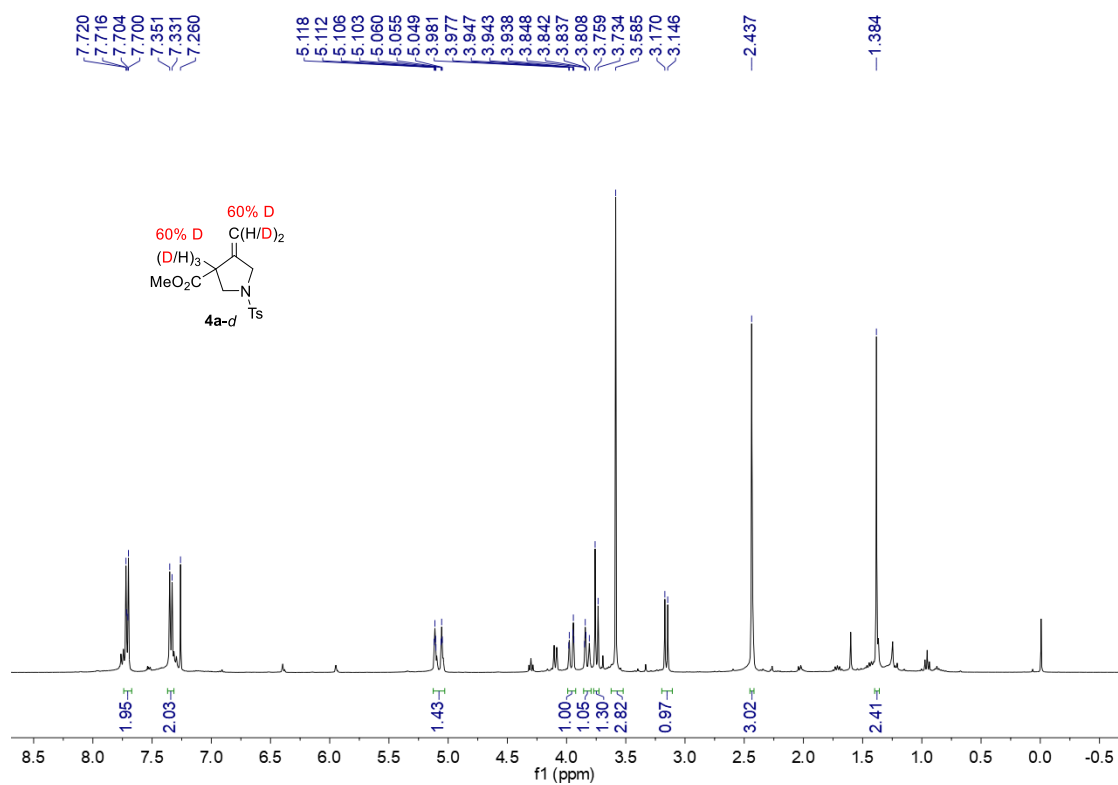

$^1\text{H}$  NMR ( $\text{CDCl}_3$ , 400 MHz) (Scheme S2 (5), in  $\text{CD}_3\text{CN}$ )

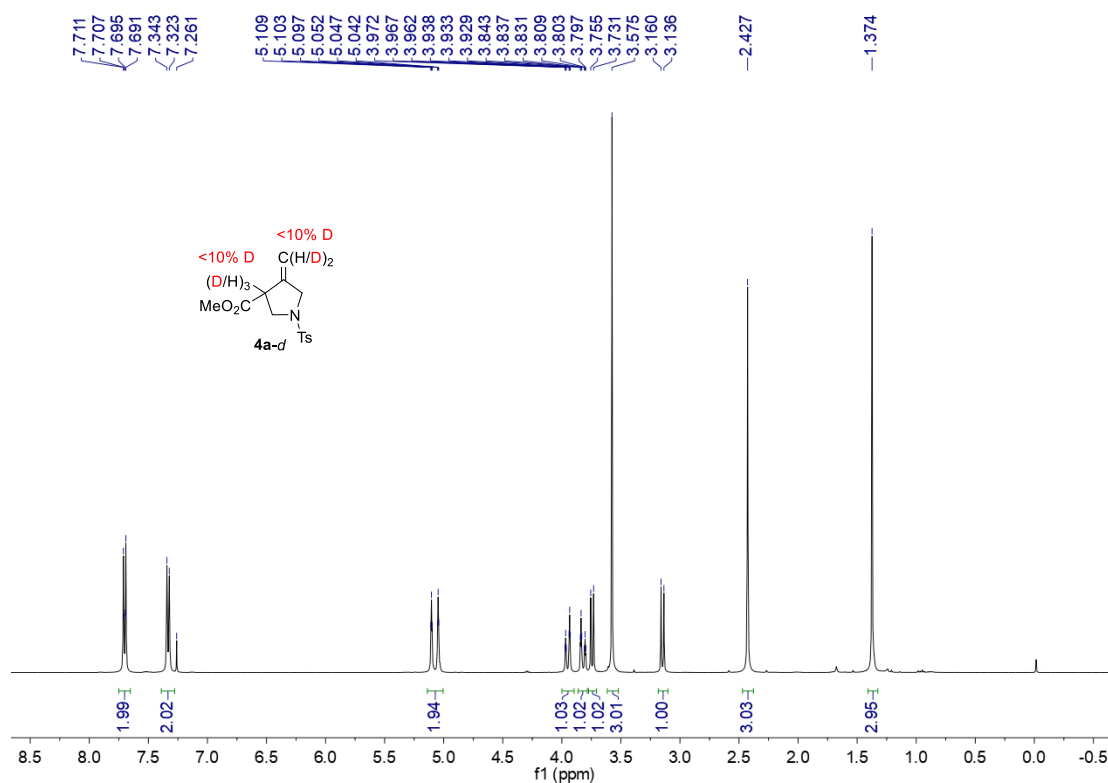

### Synthesis of ascorbic acid- $d_4$ <sup>9</sup>

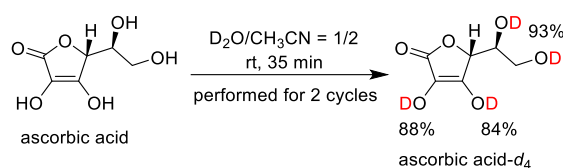

In a 50 mL round-bottom flask containing  $\text{D}_2\text{O}$  (5 mL) and  $\text{CH}_3\text{CN}$  (10 mL) was added ascorbic acid (2.52 g, 14.3 mmol). The mixture was stirred for 35 min at room temperature. The solvent was removed under reduced pressure on a rotary evaporator, then the residual was dissolved in a mixed solvent of  $\text{D}_2\text{O}$  (5 mL) and  $\text{CH}_3\text{CN}$  (10 mL), stirred 35 min at room temperature, and the solvent was removed under reduced pressure with a rotatory evaporator. The resulting solid was dried under vacuum overnight at  $50\text{ }^\circ\text{C}$ , and ascorbic acid- $d_4$  was obtained as a colorless solid. Ascorbic acid- $d_4$ :  $^1\text{H}$  NMR (400 MHz,  $\text{DMSO-}d_6$ )  $\delta$  11.01 (br, 0.07H, 84% D), 8.31 (br, 0.08H, 88% D), 4.87 (br, 0.13H, 93% D), 4.72 (d,  $J = 1.6$  Hz, 1H), 3.74–3.70 (m, 1H), 3.46–3.38 (m, 2H).

For comparison, ascorbic acid:  $^1\text{H}$  NMR (400 MHz,  $\text{DMSO-}d_6$ )  $\delta$  11.00 (br, 0.92H), 8.28 (br, 0.96H), 4.85 (br, 1.8H), 4.70 (d,  $J = 1.6$  Hz, 1H), 3.74–3.70 (m, 1H), 3.46–3.39 (m, 2H).

## $^1\text{H}$ NMR spectra

$^1\text{H}$  NMR (DMSO- $d_6$ , 400 MHz)

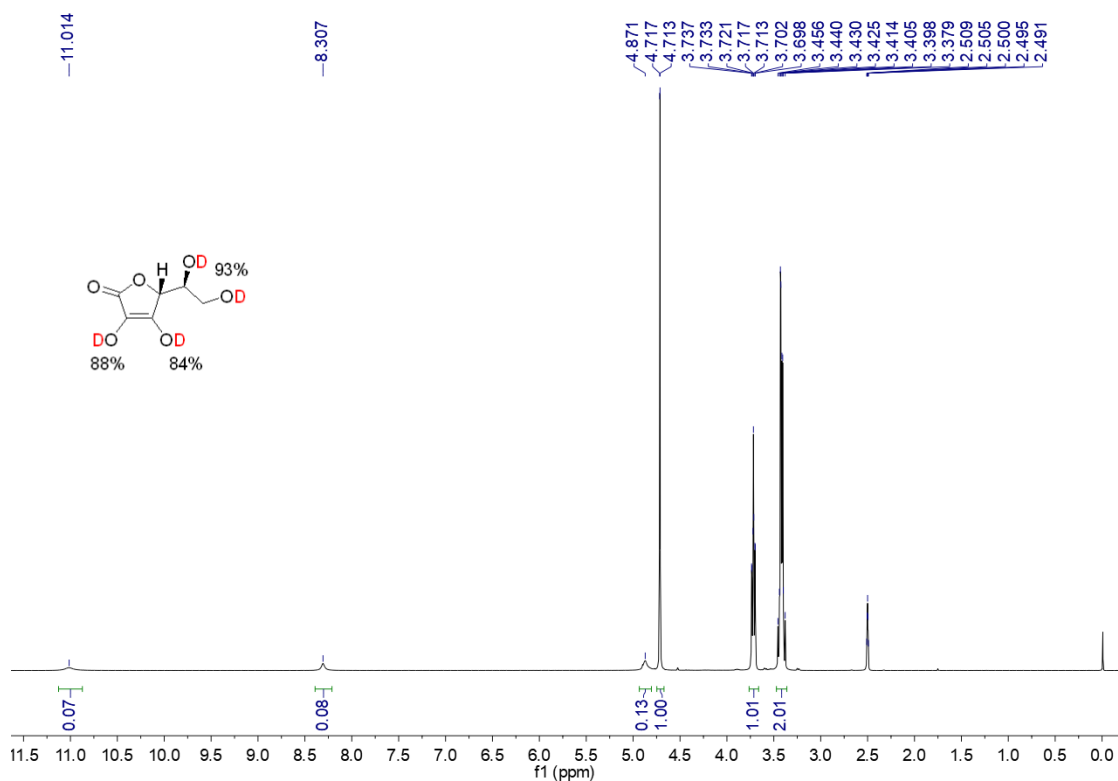

## 6.5 Luminescence quenching experiment

### 6.5.1 PC1 emission quenching by $\text{Co}(\text{dmgH})(\text{dmgH}_2)\text{Cl}_2$ or $i\text{-Pr}_2\text{NEt}$

The measurement was run with acetonitrile as the solvent under an argon atmosphere. The solution was irradiated at 373 nm and the luminescence was measured from 450 nm to 750 nm (emission maximum is at 542 nm). The concentration of **PC1** stock solution was 0.1 mM in  $\text{CH}_3\text{CN}$ . The concentration of quencher  $\text{Co}(\text{dmgH})(\text{dmgH}_2)\text{Cl}_2$  and  $i\text{-Pr}_2\text{NEt}$  stock solution was 1 mM in  $\text{CH}_3\text{CN}$ .

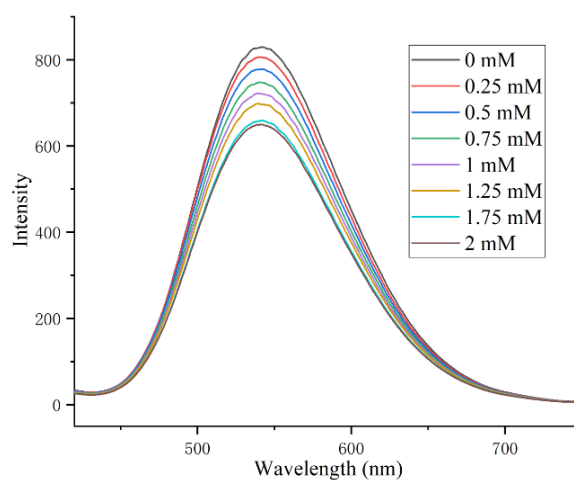

**Figure S7** Fluorescence spectra of for **PC1** in  $\text{CH}_3\text{CN}$  with progressive addition of  $\text{Co}(\text{dmgH})(\text{dmgH}_2)\text{Cl}_2$ .

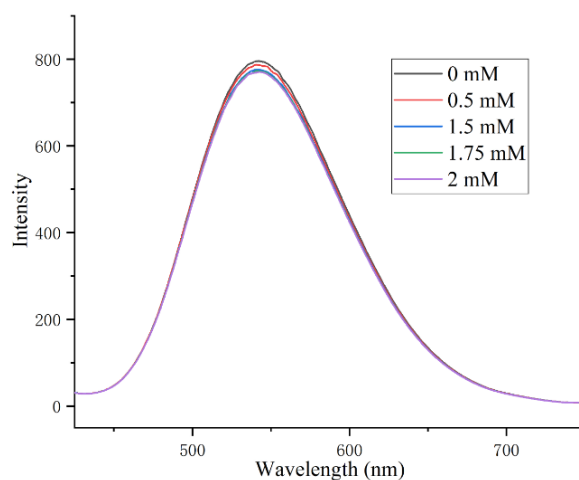

**Figure S8** Fluorescence spectra of for **PC1** in  $\text{CH}_3\text{CN}$  with progressive addition of  $i\text{-Pr}_2\text{NEt}$ .

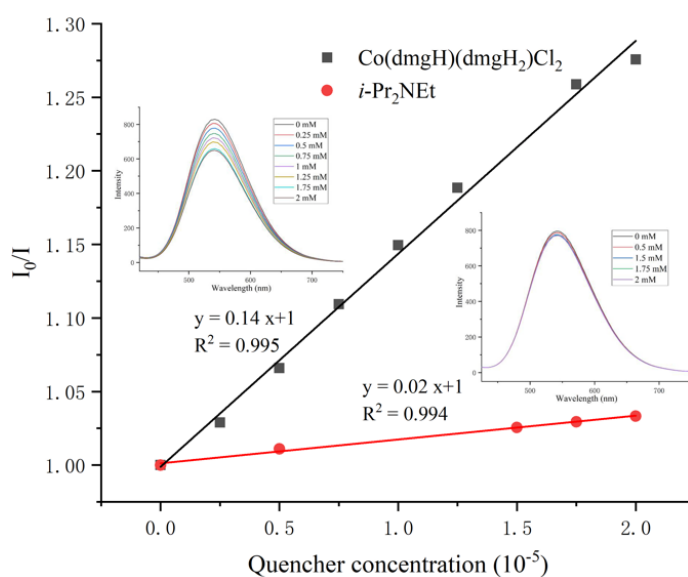

**Figure S9** Stern-Volmer plot for the luminescence quenching of **PC1** by  $\text{Co}(\text{dmGH})(\text{dmGH}_2)\text{Cl}_2$  and  $i\text{-Pr}_2\text{NEt}$  respectively in  $\text{CH}_3\text{CN}$  solution (intensity data was collected at 542 nm).

### 6.5.2 **PC2** emission quenching by $\text{Co}(\text{dmGH})(\text{dmGH}_2)\text{Cl}_2$ or Vc

The measurement was run with acetonitrile as the solvent under an argon atmosphere. The solution was irradiated at 383 nm and the luminescence was measured from 450 nm to 750 nm (emission maximum is at 550 nm). The concentration of **PC2** stock solution was 0.1 mM in  $\text{CH}_3\text{CN}$ . The concentration of quencher  $\text{Co}(\text{dmGH})(\text{dmGH}_2)\text{Cl}_2$  and Vc stock solution was 1 mM in  $\text{CH}_3\text{CN}$ .

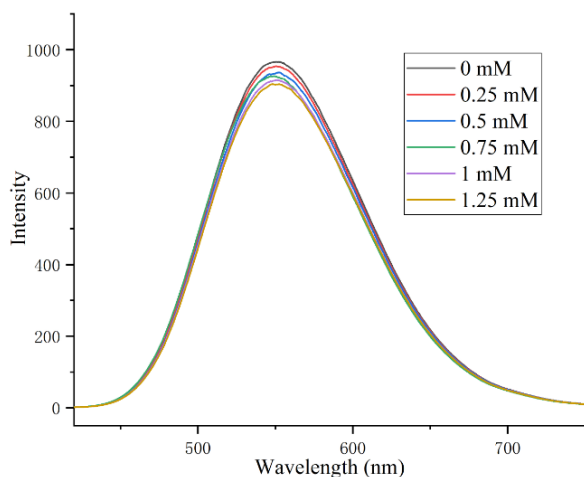

**Figure S10** Fluorescence spectra of for **PC2** in  $\text{CH}_3\text{CN}$  with progressive addition of  $\text{Co}(\text{dmgh})(\text{dmgh}_2)\text{Cl}_2$ .

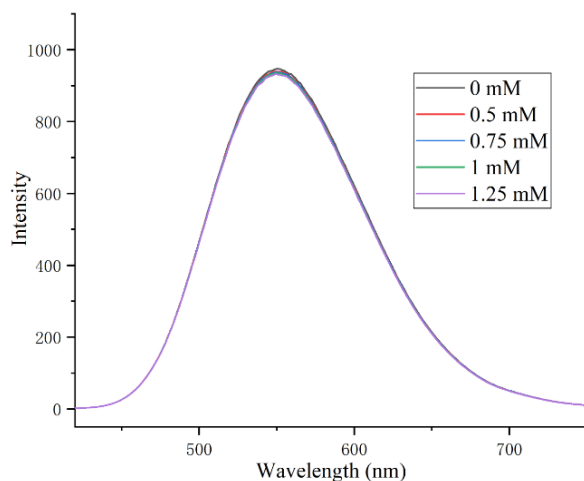

**Figure S11** Fluorescence spectra of for **PC2** in  $\text{CH}_3\text{CN}$  with progressive addition of **Vc**.

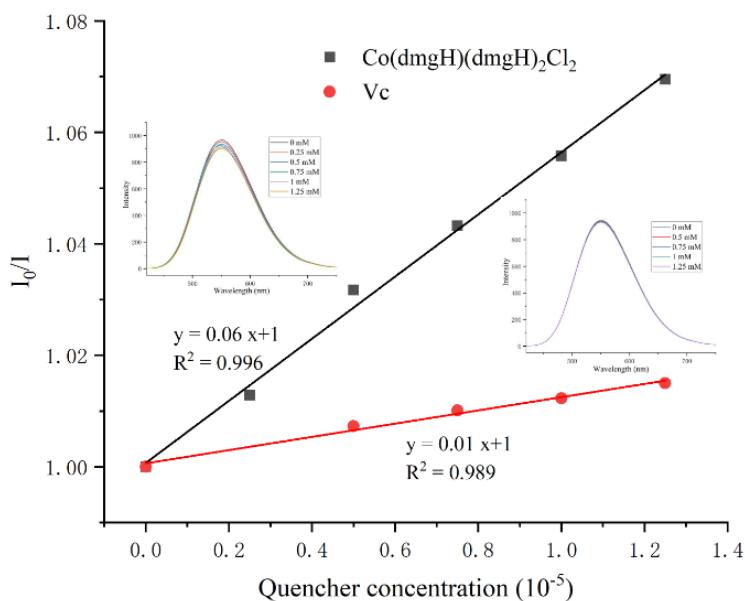

**Figure S12** Stern-Volmer plot for the luminescence quenching of **PC2** by  $\text{Co}(\text{dmgh})(\text{dmgh}_2)\text{Cl}_2$  and **Vc** respectively in  $\text{CH}_3\text{CN}$  solution (intensity data was collected at 550 nm).



## PC1 stability examination

To examine the stability of **PC1** in the reaction system, it was isolated after reaction and identified by  $^1\text{H}$  NMR. For the convenience of isolation, 10 mg **PC1** (10 mol%) was added into the reaction system. After reaction, 9.5 mg **PC1** was isolated. This result demonstrated that most of **PC1** remained intact after the reaction.

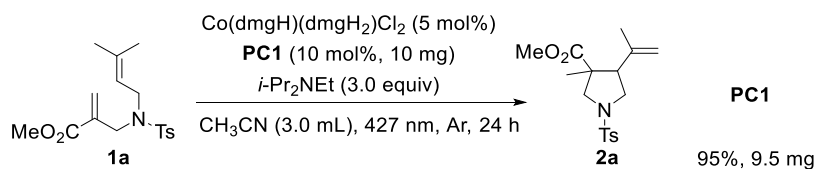

$^1\text{H}$  NMR spectra of **PC1** isolated after reaction

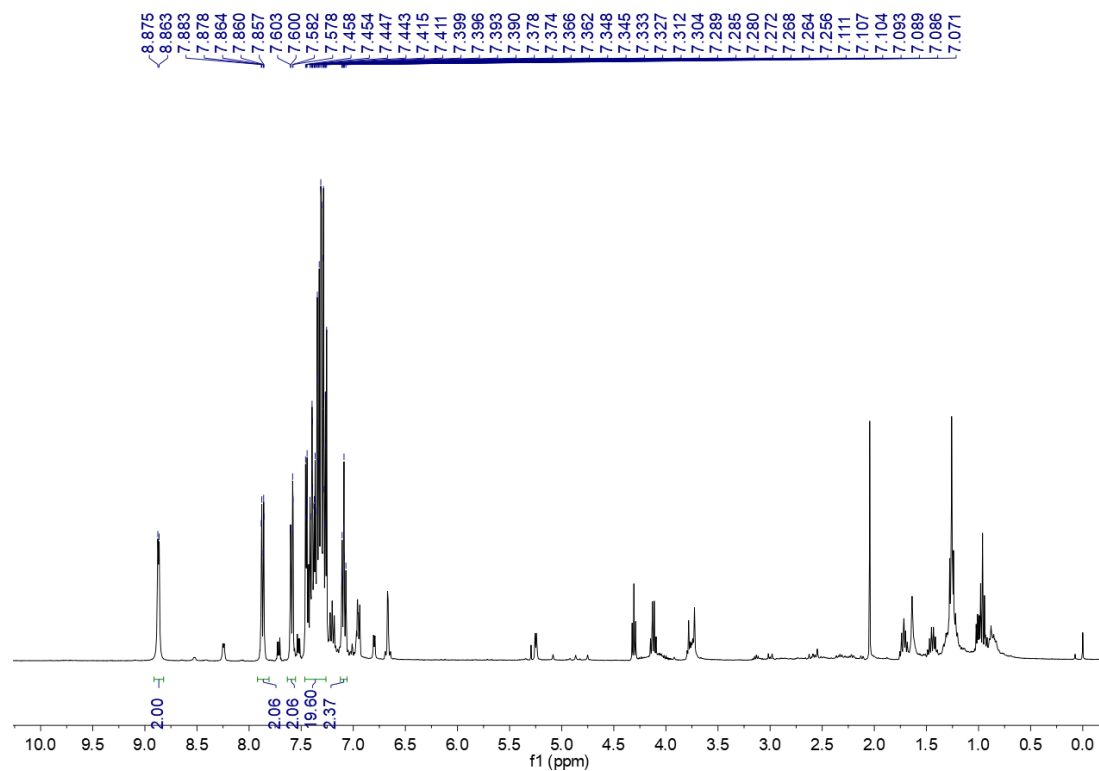

## <sup>1</sup>H NMR spectra for PC1

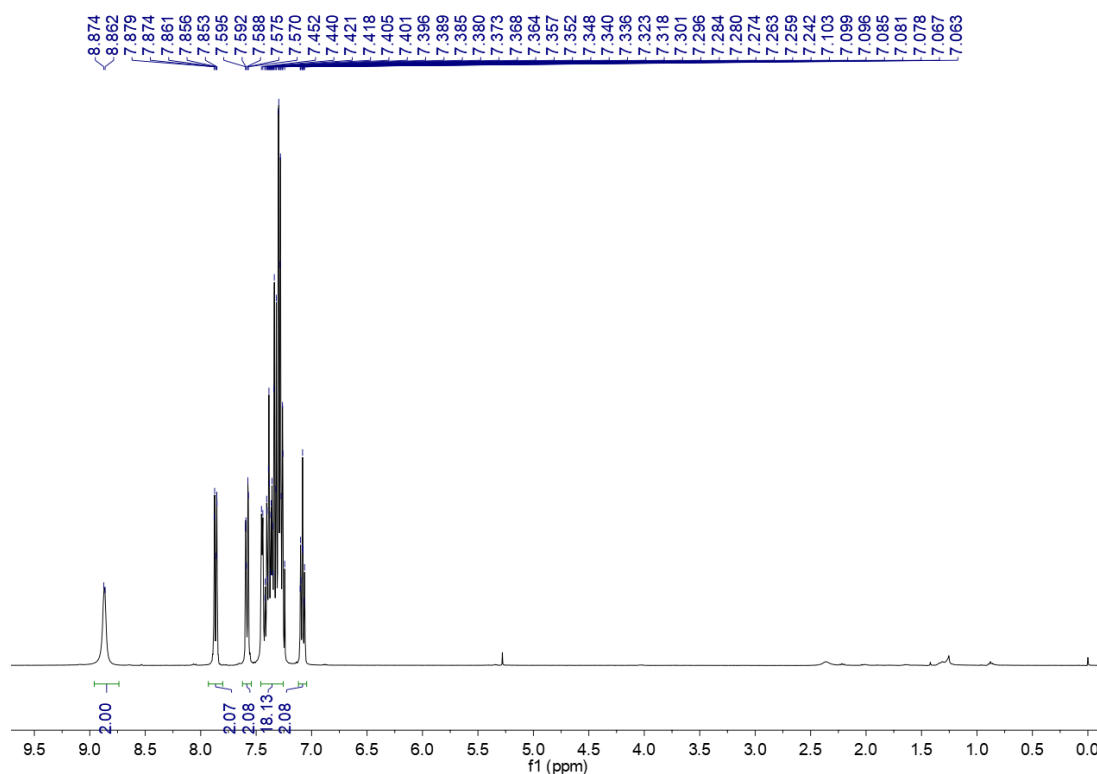

## 7. Characterization Data of Products

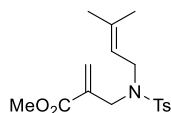

### Methyl 2-(((4-methyl-N-(3-methylbut-2-en-1-yl)phenyl)sulfonamido)methyl)acrylate (**1a**)

Colorless oil (798 mg, 81% on 2.9 mmol scale). <sup>1</sup>H NMR (400 MHz, CDCl<sub>3</sub>) δ 7.62–7.59 (m, 2H), 7.21 (d, *J* = 8.0 Hz, 2H), 6.27 (s, 1H), 5.84 (s, 1H), 4.82 (t, *J* = 7.2 Hz, 1H), 3.89 (s, 2H), 3.73 (d, *J* = 7.2 Hz, 2H), 3.64 (d, *J* = 2.0 Hz, 3H), 2.33 (s, 3H), 1.52 (s, 3H), 1.45 (s, 3H); <sup>13</sup>C NMR (101 MHz, CDCl<sub>3</sub>) δ 166.3, 143.1, 137.6, 137.2, 135.6, 129.5, 127.2, 126.8, 118.3, 51.8, 46.8, 45.7, 25.6, 21.4, 17.6.

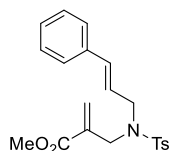

### Methyl (*E*)-2-(((4-methyl-N-(3-phenylallyl)phenyl)sulfonamido)methyl)acrylate (**1b**)

White solid (645 mg, 75% on 2.2 mmol scale). mp 68–69 °C. <sup>1</sup>H NMR (400 MHz, CDCl<sub>3</sub>) δ 7.73 (d, *J* = 8.4 Hz, 2H), 7.32–7.26 (m, 4H), 7.25–7.19 (m, 3H), 6.39–6.35

(m, 2H), 5.96 (d,  $J = 0.8$  Hz, 1H), 5.92–5.84 (m, 1H), 4.06 (s, 2H), 3.98 (dd,  $J = 7.2$ , 1.2 Hz, 2H), 3.67 (s, 3H), 2.43 (s, 3H);  $^{13}\text{C}$  NMR (101 MHz,  $\text{CDCl}_3$ )  $\delta$  166.3, 143.4, 137.1, 136.1, 135.6, 134.4, 129.7, 128.5, 127.9, 127.5, 127.3, 126.4, 123.3, 51.9, 50.6, 47.2, 21.5. HRMS (ESI):  $m/z$  calcd for  $\text{C}_{21}\text{H}_{24}\text{NO}_4\text{S}$   $[\text{M}+\text{H}]^+$  386.1421, found 386.1428.

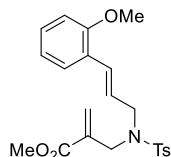

**Methyl (*E*)-2-(((4-methyl-*N*-(3-(*p*-tolyl)allyl)phenyl)sulfonamido)methyl)acrylate (1c)**

White solid (416 mg, 56% on 1.8 mmol scale). mp 99–100 °C.  $^1\text{H}$  NMR (400 MHz,  $\text{CDCl}_3$ )  $\delta$  7.74 (d,  $J = 8.4$  Hz, 2H), 7.30 (d,  $J = 8.0$  Hz, 2H), 7.23–7.17 (m, 2H), 6.89–6.82 (m, 2H), 6.70 (d,  $J = 16.0$  Hz, 1H), 6.38 (d,  $J = 0.8$  Hz, 1H), 5.98 (d,  $J = 0.8$  Hz, 1H), 5.92–5.85 (m, 1H), 4.05 (s, 2H), 3.99–3.98 (m, 2H), 3.79 (s, 3H), 3.68 (s, 3H), 2.42 (s, 3H);  $^{13}\text{C}$  NMR (101 MHz,  $\text{CDCl}_3$ )  $\delta$  166.3, 156.7, 143.3, 137.1, 135.7, 129.7, 129.5, 129.0, 127.3, 127.29, 127.0, 125.1, 123.8, 120.5, 110.8, 55.3, 51.8, 51.1, 47.0, 21.4. HRMS (ESI):  $m/z$  calcd for  $\text{C}_{22}\text{H}_{26}\text{NO}_5\text{S}$   $[\text{M}+\text{H}]^+$  416.1526, found 416.1530.

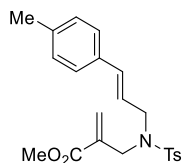

**Methyl (*E*)-2-(((4-methyl-*N*-(3-(*p*-tolyl)allyl)phenyl)sulfonamido)methyl)acrylate (1d)**

White solid (255 mg, 68% on 0.9 mmol scale). mp 64–65 °C.  $^1\text{H}$  NMR (400 MHz,  $\text{CDCl}_3$ )  $\delta$  7.73 (d,  $J = 8.0$  Hz, 2H), 7.30 (d,  $J = 8.0$  Hz, 2H), 7.11–7.06 (m, 4H), 6.36–6.32 (m, 2H), 5.95 (d,  $J = 0.8$  Hz, 1H), 5.85–5.78 (m, 1H), 4.05 (s, 2H), 3.96 (dd,  $J = 6.8$ , 0.8 Hz, 2H), 3.67 (s, 3H), 2.42 (s, 3H), 2.31 (s, 3H);  $^{13}\text{C}$  NMR (101 MHz,  $\text{CDCl}_3$ )  $\delta$  166.2, 143.3, 137.8, 137.1, 135.6, 134.2, 133.2, 129.7, 129.2, 127.3, 127.2, 126.3, 122.2, 51.8, 50.6, 47.0, 21.4, 21.1. HRMS (ESI):  $m/z$  calcd for  $\text{C}_{22}\text{H}_{26}\text{NO}_4\text{S}$   $[\text{M}+\text{H}]^+$  400.1577, found 400.1584.

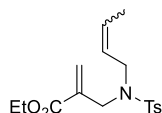

**Ethyl 2-(((*N*-(but-2-en-1-yl)-4-methylphenyl)sulfonamido)methyl)acrylate (1f)**

Colorless oil (433 mg, 76% on 1.7 mmol scale).  $^1\text{H}$  NMR (400 MHz,  $\text{CDCl}_3$ )  $\delta$  7.71–7.69 (m, 2H), 7.28 (d,  $J = 8.0$  Hz, 2H), 6.33 (s, 1H), 5.88 (s, 1H), 5.56–5.46 (m, 1H), 5.20–5.13 (m, 1H), 4.20–4.14 (m, 2H), 3.97 (s, 2H), 3.73 (d,  $J = 7.2$  Hz, 2H), 2.41 (s, 3H), 1.57 (d,  $J = 6.4$  Hz, 3H), 1.27 (t,  $J = 6.8$  Hz, 3H);  $^{13}\text{C}$  NMR (101 MHz,  $\text{CDCl}_3$ )  $\delta$  165.9, 143.2, 137.1, 135.8, 131.1, 129.6, 129.58, 127.2, 126.8, 124.9, 60.8, 50.3, 46.6,

21.4, 17.6, 14.1. HRMS (ESI):  $m/z$  calcd for  $C_{17}H_{24}NO_4S$   $[M+H]^+$  338.1421, found 338.1425.

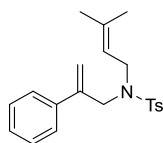

**4-Methyl-N-(3-methylbut-2-en-1-yl)-N-(2-phenylallyl)benzenesulfonamide (1g)**

White solid (637 mg, 80% on 2.2 mmol scale). mp 84–85 °C.  $^1H$  NMR (400 MHz,  $CDCl_3$ )  $\delta$  7.64 (d,  $J = 8.4$  Hz, 2H), 7.41–7.38 (m, 2H), 7.34–7.25 (m, 5H), 5.44 (s, 1H), 5.22 (s, 1H), 4.85 (t,  $J = 7.2$  Hz, 1H), 4.20 (s, 2H), 3.74 (d,  $J = 6.8$  Hz, 2H), 2.42 (s, 3H), 1.57 (s, 3H), 1.51 (s, 3H);  $^{13}C$  NMR (101 MHz,  $CDCl_3$ )  $\delta$  143.05, 143.0, 138.7, 137.3, 136.7, 129.5, 128.3, 127.9, 127.3, 126.4, 118.5, 115.6, 50.2, 44.5, 25.7, 21.5, 17.7. HRMS (ESI):  $m/z$  calcd for  $C_{21}H_{26}NO_2S$   $[M+H]^+$  356.1679, found 356.1684.

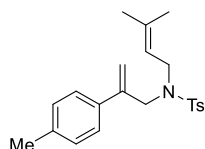

**4-Methyl-N-(3-methylbut-2-en-1-yl)-N-(2-(p-tolyl)allyl)benzenesulfonamide (1h)**

White solid (993 mg, 73% on 3.7 mmol scale). mp 64–65 °C.  $^1H$  NMR (400 MHz,  $CDCl_3$ )  $\delta$  7.66–7.64 (m, 2H), 7.30–7.25 (m, 4H), 7.12 (d,  $J = 8.0$  Hz, 2H), 5.40 (d,  $J = 0.8$  Hz, 1H), 5.16 (d,  $J = 1.2$  Hz, 1H), 4.86–4.82 (m, 1H), 4.18 (s, 2H), 3.74 (d,  $J = 7.2$  Hz, 2H), 2.42 (s, 3H), 2.35 (s, 3H), 1.57 (d,  $J = 0.8$  Hz, 3H), 1.51 (s, 3H);  $^{13}C$  NMR (101 MHz,  $CDCl_3$ )  $\delta$  142.9, 142.8, 137.7, 137.3, 136.6, 135.8, 129.4, 129.0, 127.3, 126.3, 118.5, 114.8, 50.3, 44.5, 25.7, 21.5, 21.1, 17.7. HRMS (ESI):  $m/z$  calcd for  $C_{22}H_{28}NO_2S$   $[M+H]^+$  370.18345, found 370.1830.

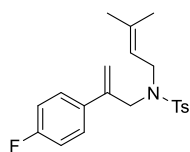

**N-(2-(4-Fluorophenyl)allyl)-4-methyl-N-(3-methylbut-2-en-1-yl)benzenesulfonamide (1i)**

White solid (1.09 g, 75% on 3.9 mmol scale). mp 80–81 °C.  $^1H$  NMR (400 MHz,  $CDCl_3$ )  $\delta$  7.65–7.63 (m, 2H), 7.40–7.37 (m, 2H), 7.27 (d,  $J = 8.0$  Hz, 2H), 7.02–6.98 (m, 2H), 5.39 (s, 1H), 5.19 (d,  $J = 1.2$  Hz, 1H), 4.83–4.79 (m, 1H), 4.17 (s, 2H), 3.72 (d,  $J = 7.2$  Hz, 2H), 2.43 (s, 3H), 1.56 (d,  $J = 0.8$  Hz, 3H), 1.51 (s, 3H);  $^{13}C$  NMR (101 MHz,  $CDCl_3$ )  $\delta$  162.5 (d,  $J_{C-F} = 248.6$  Hz), 143.1, 142.1, 137.1, 136.6, 134.6 (d,  $J_{C-F} = 3.3$  Hz), 129.5, 128.2 (d,  $J_{C-F} = 8.0$  Hz), 127.3, 118.4, 115.7, 115.2 (d,  $J_{C-F} = 21.2$  Hz), 50.5, 44.6, 25.7, 21.6, 17.7;  $^{19}F$  NMR (376 MHz,  $CDCl_3$ )  $\delta$  -114.3. HRMS (ESI):  $m/z$  calcd for  $C_{21}H_{25}FNO_2S$   $[M+H]^+$  374.1585, found 374.1581.

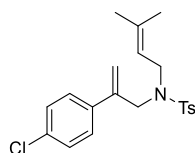

***N*-(2-(4-Chlorophenyl)allyl)-4-methyl-*N*-(3-methylbut-2-en-1-yl)benzenesulfonamide (1j)**

White solid (1.18g, 79% on 3.8 mmol scale). mp 72–73 °C. <sup>1</sup>H NMR (400 MHz, CDCl<sub>3</sub>) δ 7.64 (d, *J* = 8.4 Hz, 2H), 7.36–7.33 (m, 2H), 7.27–7.25 (m, 4H), 5.42 (s, 1H), 5.22 (s, 1H), 4.80 (t, *J* = 6.8 Hz, 1H), 4.17 (s, 2H), 3.71 (d, *J* = 6.8 Hz, 2H), 2.41 (s, 3H), 1.55 (s, 3H), 1.50 (s, 3H); <sup>13</sup>C NMR (101 MHz, CDCl<sub>3</sub>) δ 143.1, 142.0, 136.9, 136.85, 136.5, 133.6, 129.4, 128.3, 127.7, 127.1, 118.3, 116.2, 50.4, 44.5, 25.6, 21.3, 17.6. HRMS (ESI): *m/z* calcd for C<sub>21</sub>H<sub>25</sub>ClNO<sub>2</sub>S [M+H]<sup>+</sup> 390.1289, found 390.1283.

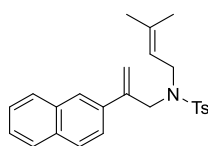

**4-Methyl-*N*-(3-methylbut-2-en-1-yl)-*N*-(2-(naphthalen-2-yl)allyl)benzenesulfonamide (1k)**

White solid (433 mg, 38% on 2.8 mmol scale). mp 87–88 °C. <sup>1</sup>H NMR (400 MHz, CDCl<sub>3</sub>) δ 7.87–7.79 (m, 4H), 7.67 (d, *J* = 8.4 Hz, 2H), 7.57 (dd, *J* = 8.4, 1.6 Hz, 1H), 7.49–7.47 (m, 2H), 7.22 (d, *J* = 8.0 Hz, 2H), 5.61 (s, 1H), 5.35 (d, *J* = 0.8 Hz, 1H), 4.94–4.90 (m, 1H), 4.35 (s, 2H), 3.81 (d, *J* = 6.8 Hz, 2H), 2.40 (s, 3H), 1.60 (s, 3H), 1.54 (s, 3H); <sup>13</sup>C NMR (101 MHz, CDCl<sub>3</sub>) δ 142.9, 142.8, 137.2, 136.6, 135.9, 133.1, 132.9, 129.4, 128.2, 127.8, 127.4, 127.2, 126.1, 126.0, 125.3, 124.5, 118.5, 116.2, 50.3, 44.6, 25.6, 21.4, 17.7. HRMS (ESI): *m/z* calcd for C<sub>25</sub>H<sub>28</sub>NO<sub>2</sub>S [M+H]<sup>+</sup> 406.1835, found 406.1830.

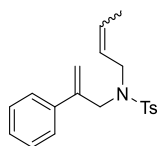

***N*-(but-2-en-1-yl)-4-methyl-*N*-(2-phenylallyl)benzenesulfonamide (1l)**

Colorless oil (341 mg, 62% on 1.6 mmol scale). <sup>1</sup>H NMR (400 MHz, CDCl<sub>3</sub>) δ 7.67–7.63 (m, 2H), 7.43–7.37 (m, 2H), 7.31–7.25 (m, 5H), 5.53–5.46 (m, 1H), 5.46–5.43 (m, 1H), 5.24–5.22 (m, 1H), 5.19–5.11 (m, 1H), 4.22–4.21 (m, 2H), 3.82–3.66 (m, 2H), 2.42 (s, 3H), 1.58–1.51 (m, 3H); <sup>13</sup>C NMR (101 MHz, CDCl<sub>3</sub>) δ 143.1, 142.8, 138.7, 137.2, 130.8, 129.5, 128.3, 127.9, 127.4, 126.5, 124.8, 115.9, 50.0, 48.8, 21.5, 17.6. HRMS (ESI): *m/z* calcd for C<sub>20</sub>H<sub>24</sub>NO<sub>2</sub>S [M+H]<sup>+</sup> 342.1522, found 342.1526.

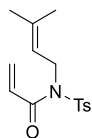

***N*-(3-Methylbut-2-en-1-yl)-*N*-tosylacrylamide (1o)**

Colorless oil (357 mg, 29% on 4.2 mmol scale). <sup>1</sup>H NMR (400 MHz, CDCl<sub>3</sub>) δ 7.78–7.76 (m, 2H), 7.31–7.26 (m, 2H), 6.92–6.85 (m, 1H), 6.38–6.33 (m, 1H), 5.76–5.72 (m, 1H), 5.22–5.17 (m, 1H), 4.47 (d, *J* = 6.4 Hz, 2H), 2.42 (s, 3H), 1.74–1.71 (m, 6H); <sup>13</sup>C NMR (101 MHz, CDCl<sub>3</sub>) δ 165.6, 144.6, 137.0, 136.6, 131.1, 129.6, 128.6, 127.6, 119.6, 44.7, 25.6, 21.6, 18.0. HRMS (ESI): *m/z* calcd for C<sub>15</sub>H<sub>20</sub>NO<sub>3</sub>S [M+H]<sup>+</sup> 294.1158, found 294.1165.

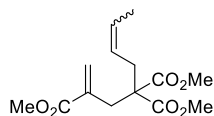

**Trimethyl octa-1,6-diene-2,4,4-tricarboxylate (1s)**

Colorless oil (827 mg, 80% on 2.7 mmol scale). <sup>1</sup>H NMR (400 MHz, CDCl<sub>3</sub>) δ 6.24 (s, 1H), 5.63 (s, 1H), 5.51–5.46 (m, 1H), 5.32–5.24 (m, 1H), 3.69–3.66 (m, 9H), 2.93 (s, 2H), 2.50 (d, *J* = 7.2 Hz, 2H), 1.62 (d, *J* = 6.4 Hz, 3H); <sup>13</sup>C NMR (101 MHz, CDCl<sub>3</sub>) δ 171.1, 167.3, 135.9, 130.0, 129.0, 124.5, 57.9, 52.2, 51.9, 36.1, 33.8, 18.0. HRMS (ESI): *m/z* calcd for C<sub>14</sub>H<sub>21</sub>O<sub>6</sub> [M+H]<sup>+</sup> 285.1333, found 285.1337.

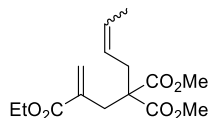

**2-Ethyl 4,4-dimethyl octa-1,6-diene-2,4,4-tricarboxylate (1t)**

Colorless oil (1.35 g, 84% on 5.4 mmol scale). <sup>1</sup>H NMR (400 MHz, CDCl<sub>3</sub>) δ 6.22–6.21 (m, 1H), 5.59 (s, 1H), 5.50–5.44 (m, 1H), 5.30–5.25 (m, 1H), 4.16–4.10 (m, 2H), 3.64–3.63 (m, 6H), 2.94–2.91 (m, 2H), 2.58–2.48 (m, 2H), 1.60–1.55 (m, 3H), 1.27–1.22 (m, 3H); <sup>13</sup>C NMR (101 MHz, CDCl<sub>3</sub>) δ 171.0, 166.8, 136.2, 129.8, 128.6, 124.6, 60.8, 58.0, 52.1, 36.1, 33.7, 17.9, 14.0. HRMS (ESI): *m/z* calcd for C<sub>15</sub>H<sub>23</sub>O<sub>6</sub> [M+H]<sup>+</sup> 299.1489, found 299.1492.

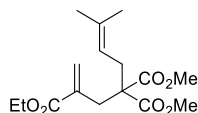

**2-Ethyl 4,4-dimethyl 7-methylocta-1,6-diene-2,4,4-tricarboxylate (1u)**

Colorless oil (2.0 g, 70% on 9.2 mmol scale). <sup>1</sup>H NMR (400 MHz, CDCl<sub>3</sub>) δ 6.19 (d, *J* = 1.2 Hz, 1H), 5.54 (d, *J* = 1.2 Hz, 1H), 4.97–4.93 (m, 1H), 4.10 (q, *J* = 14.4, 7.2 Hz, 2H), 3.62 (s, 6H), 2.90 (d, *J* = 1.2 Hz, 2H), 2.50 (d, *J* = 7.2 Hz, 2H), 1.63 (s, 3H), 1.53 (s, 3H), 1.22 (t, *J* = 7.2 Hz, 3H); <sup>13</sup>C NMR (101 MHz, CDCl<sub>3</sub>) δ 171.2, 166.7, 136.1, 135.4, 128.5, 117.5, 60.7, 57.7, 52.1, 33.7, 31.3, 25.8, 17.8, 14.0. HRMS (ESI): *m/z* calcd for C<sub>16</sub>H<sub>25</sub>O<sub>6</sub> [M+H]<sup>+</sup> 313.1646, found 313.1648.

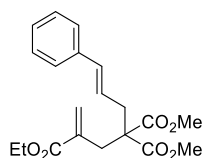

### 2-Ethyl 4,4-dimethyl (*E*)-7-phenylhepta-1,6-diene-2,4,4-tricarboxylate (**1v**)

Colorless oil (1.0 g, 71% on 4.0 mmol scale).  $^1\text{H}$  NMR (400 MHz,  $\text{CDCl}_3$ )  $\delta$  7.33–7.26 (m, 4H), 7.23–7.19 (m, 1H), 6.42 (d,  $J = 15.6$  Hz, 1H), 6.29 (d,  $J = 1.2$  Hz, 1H), 6.14–6.10 (m, 1H), 5.67 (s, 1H), 4.17 (q,  $J = 14.4, 7.2$  Hz, 2H), 3.70 (s, 6H), 3.04 (s, 2H), 2.75 (d,  $J = 7.6$  Hz, 2H), 1.28 (t,  $J = 7.2$  Hz, 3H);  $^{13}\text{C}$  NMR (101 MHz,  $\text{CDCl}_3$ )  $\delta$  171.0, 166.9, 137.0, 136.1, 134.0, 128.9, 128.5, 127.4, 126.2, 124.0, 60.9, 58.3, 52.4, 36.7, 34.2, 14.1. HRMS (ESI):  $m/z$  calcd for  $\text{C}_{20}\text{H}_{25}\text{O}_6$   $[\text{M} + \text{H}]^+$  361.1646, found 361.1651.

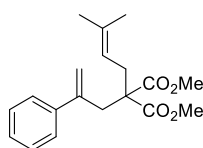

### Dimethyl 2-(3-methylbut-2-en-1-yl)-2-(2-phenylallyl)malonate (**1w**)

Colorless oil (808 mg, 73% on 3.5 mmol scale).  $^1\text{H}$  NMR (400 MHz,  $\text{CDCl}_3$ )  $\delta$  7.31–7.22 (m, 5H), 5.25 (d,  $J = 1.6$  Hz, 1H), 5.10 (d,  $J = 0.8$  Hz, 1H), 4.95–4.91 (m, 1H), 3.41 (s, 6H), 3.16 (s, 2H), 2.54 (d,  $J = 7.2$  Hz, 2H), 1.67 (d,  $J = 0.8$  Hz, 3H), 1.51 (s, 3H);  $^{13}\text{C}$  NMR (101 MHz,  $\text{CDCl}_3$ )  $\delta$  171.4, 144.5, 141.5, 135.5, 127.9, 127.4, 126.9, 118.4, 117.6, 57.4, 52.0, 37.3, 30.3, 26.0, 17.9. HRMS (ESI):  $m/z$  calcd for  $\text{C}_{19}\text{H}_{25}\text{O}_4$   $[\text{M} + \text{H}]^+$  317.1747, found 317.1752.

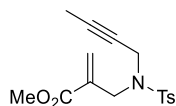

### Methyl 2-(((*N*-(but-2-yn-1-yl)-4-methylphenyl)sulfonamido)methyl)acrylate (**3b**)

Colorless oil (546 mg, 81% on 2.4 mmol scale).  $^1\text{H}$  NMR (400 MHz,  $\text{CDCl}_3$ )  $\delta$  7.74 (d,  $J = 8.4$  Hz, 2H), 7.29 (d,  $J = 8.0$  Hz, 2H), 6.36 (d,  $J = 1.2$  Hz, 1H), 5.92 (d,  $J = 0.8$  Hz, 1H), 4.04 (s, 2H), 4.01 (q,  $J = 4.8, 2.4$  Hz, 2H), 3.74 (s, 3H), 2.41 (s, 3H), 1.52 (t,  $J = 2.0$  Hz, 3H);  $^{13}\text{C}$  NMR (101 MHz,  $\text{CDCl}_3$ )  $\delta$  166.2, 143.4, 136.0, 134.9, 129.3, 127.8, 127.3, 81.9, 71.6, 51.9, 46.6, 37.4, 21.4, 3.2. HRMS (ESI):  $m/z$  calcd for  $\text{C}_{16}\text{H}_{20}\text{NO}_4\text{S}$   $[\text{M} + \text{H}]^+$  322.1108, found 322.1110.

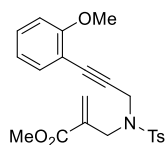

### Methyl 2-(((*N*-(3-(2-methoxyphenyl)prop-2-yn-1-yl)-4-methylphenyl)sulfonamido)methyl)acrylate (**3d**)

White solid (378 mg, 72% on 1.3 mmol scale). mp 86–87 °C. <sup>1</sup>H NMR (400 MHz, CDCl<sub>3</sub>) δ 7.79 (d, *J* = 8.0 Hz, 2H), 7.26–7.20 (m, 3H), 6.91 (dd, *J* = 7.6, 1.6 Hz, 1H), 6.83–6.79 (m, 2H), 6.41 (s, 1H), 6.03 (s, 1H), 4.35 (s, 2H), 4.17 (s, 2H), 3.79 (s, 3H), 3.76 (s, 3H), 2.29 (s, 3H); <sup>13</sup>C NMR (101 MHz, CDCl<sub>3</sub>) δ 166.2, 160.0, 143.5, 135.8, 134.8, 133.3, 129.8, 129.4, 127.8, 127.7, 120.1, 111.3, 110.4, 85.6, 82.5, 55.5, 52.0, 46.8, 38.0, 21.3. HRMS (ESI): *m/z* calcd for C<sub>22</sub>H<sub>24</sub>NO<sub>5</sub>S [M+H]<sup>+</sup> 414.1370, found 414.1374.

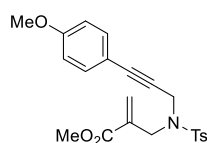

**Methyl 2-(((N-(3-(4-methoxyphenyl)prop-2-yn-1-yl)-4-methylphenyl)sulfonamido)methyl)acrylate (3e)**

White solid (507 mg, 54% on 2.3 mmol scale). mp 72–73 °C. <sup>1</sup>H NMR (400 MHz, CDCl<sub>3</sub>) δ 7.79 (d, *J* = 8.4 Hz, 2H), 7.26 (d, *J* = 8.0 Hz, 2H), 7.02–6.98 (m, 2H), 6.77–6.74 (m, 2H), 6.41 (d, *J* = 0.8 Hz, 1H), 5.99 (d, *J* = 1.2 Hz, 1H), 4.29 (s, 2H), 4.14 (s, 2H), 3.78 (s, 3H), 3.76 (s, 3H), 2.35 (s, 3H); <sup>13</sup>C NMR (101 MHz, CDCl<sub>3</sub>) δ 166.2, 159.6, 143.5, 135.9, 134.9, 132.9, 129.5, 127.8, 127.5, 114.0, 113.7, 85.8, 80.1, 55.2, 52.0, 46.8, 37.8, 21.4. HRMS (ESI): *m/z* calcd for C<sub>22</sub>H<sub>24</sub>NO<sub>5</sub>S [M+H]<sup>+</sup> 414.1370, found 414.1374.

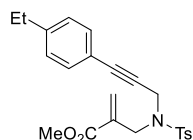

**Methyl 2-(((N-(3-(4-ethylphenyl)prop-2-yn-1-yl)-4-methylphenyl)sulfonamido)methyl)acrylate (3f)**

Colorless oil (364 mg, 77% on 1.2 mmol scale). <sup>1</sup>H NMR (400 MHz, CDCl<sub>3</sub>) δ 7.80 (d, *J* = 8.4 Hz, 2H), 7.27 (d, *J* = 8.0 Hz, 2H), 7.07 (d, *J* = 8.0 Hz, 2H), 6.99–6.97 (m, 2H), 6.42 (d, *J* = 0.8 Hz, 1H), 6.00 (d, *J* = 1.2 Hz, 1H), 4.31 (s, 2H), 4.14 (s, 2H), 3.77 (s, 3H), 2.62 (q, *J* = 15.2, 7.6 Hz, 2H), 2.35 (s, 3H), 1.21 (t, *J* = 7.6 Hz, 3H); <sup>13</sup>C NMR (101 MHz, CDCl<sub>3</sub>) δ 166.2, 144.9, 143.6, 136.0, 134.9, 131.5, 129.6, 127.8, 127.7, 119.2, 86.1, 80.9, 52.0, 46.9, 37.8, 28.8, 21.4, 15.3. HRMS (ESI): *m/z* calcd for C<sub>23</sub>H<sub>26</sub>NO<sub>4</sub>S [M+H]<sup>+</sup> 412.1577, found 412.1580.

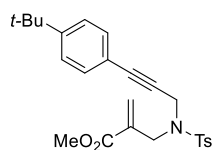

**Methyl 2-(((N-(3-(4-tert-butylphenyl)prop-2-yn-1-yl)-4-methylphenyl)sulfonamido)methyl)acrylate (3g)**



White solid (326 mg, 79% on 0.9 mmol scale). mp 46–47 °C. <sup>1</sup>H NMR (400 MHz, CDCl<sub>3</sub>) δ 7.81 (d, *J* = 8.4 Hz, 2H), 7.29–7.26 (m, 4H), 7.04–7.01 (m, 2H), 6.44 (d, *J* = 0.8 Hz, 1H), 6.01 (d, *J* = 1.2 Hz, 1H), 4.33 (s, 2H), 4.16 (s, 2H), 3.78 (s, 3H), 2.35 (s, 3H), 1.31 (s, 9H); <sup>13</sup>C NMR (101 MHz, CDCl<sub>3</sub>) δ 166.1, 151.7, 143.5, 135.9, 134.9, 131.2, 129.5, 127.7, 127.6, 125.0, 119.0, 86.0, 80.8, 52.0, 46.8, 37.8, 34.7, 31.0, 21.4. HRMS (ESI): *m/z* calcd for C<sub>25</sub>H<sub>30</sub>NO<sub>4</sub>S [M+H]<sup>+</sup> 440.1890, found 440.1897.

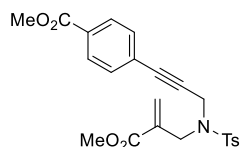

**Methyl 4-(3-((*N*-(2-(methoxycarbonyl)allyl)-4-methylphenyl)sulfonamido)prop-1-yn-1-yl)benzoate (3h)**

Gray solid (438 mg, 74% on 1.3 mmol scale). mp 87–88 °C. <sup>1</sup>H NMR (400 MHz, CDCl<sub>3</sub>) δ 7.92–7.90 (m, 2H), 7.79 (d, *J* = 8.4 Hz, 2H), 7.26 (d, *J* = 8.0 Hz, 2H), 7.12–7.10 (m, 2H), 6.43 (d, *J* = 0.8 Hz, 1H), 6.00 (d, *J* = 0.8 Hz, 1H), 4.33 (s, 2H), 4.15 (s, 2H), 3.91 (s, 3H), 3.77 (s, 3H), 2.34 (s, 3H); <sup>13</sup>C NMR (101 MHz, CDCl<sub>3</sub>) δ 166.3, 166.2, 143.8, 135.9, 134.8, 131.4, 129.8, 129.6, 129.3, 127.8, 127.75, 126.6, 85.1, 84.8, 52.3, 52.1, 47.1, 37.8, 21.5. HRMS (ESI): *m/z* calcd for C<sub>23</sub>H<sub>24</sub>NO<sub>6</sub>S [M+H]<sup>+</sup> 442.1319, found 442.1325.

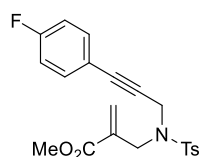

**Methyl 2-(((*N*-(3-(4-fluorophenyl)prop-2-yn-1-yl)-4-methylphenyl)sulfonamido)methyl)acrylate (3i)**

White solid (342 mg, 74% on 1.2 mmol scale). mp 99–100 °C. <sup>1</sup>H NMR (400 MHz, CDCl<sub>3</sub>) δ 7.79 (d, *J* = 8.4 Hz, 2H), 7.26 (d, *J* = 8.0 Hz, 2H), 7.07–7.03 (m, 2H), 6.95–6.91 (m, 2H), 6.42 (s, 1H), 5.99 (s, 1H), 4.29 (s, 2H), 4.14 (s, 2H), 3.76 (d, *J* = 1.6 Hz, 3H), 2.35 (s, 3H); <sup>13</sup>C NMR (100 MHz, CDCl<sub>3</sub>) δ 166.2, 162.5 (d, *J*<sub>C-F</sub> = 248.6 Hz), 143.6, 136.0, 134.9, 133.4 (d, *J*<sub>C-F</sub> = 8.4 Hz), 129.5, 127.8, 127.6, 118.1 (d, *J*<sub>C-F</sub> = 3.4 Hz), 115.4 (d, *J*<sub>C-F</sub> = 21.9 Hz), 84.8, 81.5, 52.0, 47.0, 37.7, 21.4; <sup>19</sup>F NMR (376 MHz, CDCl<sub>3</sub>) δ -110.4. HRMS (ESI): *m/z* calcd for C<sub>21</sub>H<sub>21</sub>FNO<sub>4</sub>S [M+H]<sup>+</sup> 402.1170, found 402.1176.

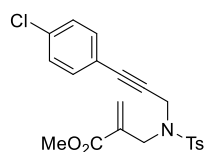

**Methyl 2-(((*N*-(3-(4-chlorophenyl)prop-2-yn-1-yl)-4-methylphenyl)sulfonamido)methyl)acrylate (3j)**

White solid (351 mg, 77% on 1.1 mmol scale). mp 125–126 °C. <sup>1</sup>H NMR (400 MHz, CDCl<sub>3</sub>) δ 7.79 (d, *J* = 8.4 Hz, 2H), 7.26 (d, *J* = 8.0 Hz, 2H), 7.23–7.20 (m, 2H), 7.00–6.98 (m, 2H), 6.42 (d, *J* = 1.2 Hz, 1H), 6.00 (d, *J* = 0.8 Hz, 1H), 4.30 (s, 2H), 4.14 (s, 2H), 3.77 (s, 3H), 2.35 (s, 3H); <sup>13</sup>C NMR (101 MHz, CDCl<sub>3</sub>) δ 166.2, 143.7, 136.0, 134.8, 134.6, 132.7, 129.6, 128.5, 127.8, 127.7, 120.5, 84.7, 82.8, 52.1, 47.0, 37.7, 21.5. HRMS (ESI): *m/z* calcd for C<sub>21</sub>H<sub>21</sub>ClNO<sub>4</sub>S [M+H]<sup>+</sup> 418.0874, found 418.0878.

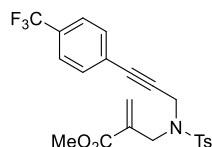

**Methyl 2-(((4-methyl-N-(3-(4-(trifluoromethyl)phenyl)prop-2-yn-1-yl)phenyl)sulfonamido)methyl)acrylate (3k)**

White solid (349 mg, 78% on 1.0 mmol scale). mp 105–106 °C. <sup>1</sup>H NMR (400 MHz, CDCl<sub>3</sub>) δ 7.79 (d, *J* = 8.4 Hz, 2H), 7.50 (d, *J* = 8.4 Hz, 2H), 7.26 (d, *J* = 8.0 Hz, 2H), 7.17 (d, *J* = 8.0 Hz, 2H), 6.43 (d, *J* = 0.8 Hz, 1H), 6.00 (d, *J* = 1.2 Hz, 1H), 4.33 (s, 2H), 4.15 (s, 2H), 3.77 (s, 3H), 2.34 (s, 3H); <sup>13</sup>C NMR (101 MHz, CDCl<sub>3</sub>) δ 166.2, 143.7, 135.9, 134.8, 131.7, 130.2 (q, *J*<sub>C-F</sub> = 32.7 Hz), 129.6, 127.8, 127.7, 125.8, 125.81, 123.7 (q, *J*<sub>C-F</sub> = 271 Hz), 125.0 (q, *J*<sub>C-F</sub> = 3.8 Hz), 84.44, 52.1, 47.1, 37.7, 21.4; <sup>19</sup>F NMR (376 MHz, CDCl<sub>3</sub>) δ -62.9. HRMS (ESI): *m/z* calcd for C<sub>22</sub>H<sub>21</sub>F<sub>3</sub>NO<sub>4</sub>S [M+H]<sup>+</sup> 452.1138, found 452.1144.

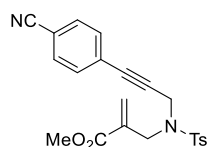

**Methyl 2-(((N-(3-(4-cyanophenyl)prop-2-yn-1-yl)-4-methylphenyl)sulfonamido)methyl)acrylate (3l)**

White solid (337 mg, 73% on 1.1 mmol scale). mp 167–168 °C. <sup>1</sup>H NMR (400 MHz, CDCl<sub>3</sub>) δ 7.78 (d, *J* = 8.0 Hz, 2H), 7.54–7.52 (m, 2H), 7.26 (d, *J* = 8.0 Hz, 2H), 7.16–7.14 (m, 2H), 6.42 (d, *J* = 0.8 Hz, 1H), 5.99 (d, *J* = 1.2 Hz, 1H), 4.33 (s, 2H), 4.14 (s, 2H), 3.76 (s, 3H), 2.34 (s, 3H); <sup>13</sup>C NMR (100 MHz, CDCl<sub>3</sub>) δ 166.2, 143.8, 135.9, 134.7, 132.0, 131.8, 129.6, 127.8, 126.9, 118.2, 111.9, 86.5, 84.1, 52.1, 47.1, 37.7, 21.4. HRMS (ESI): *m/z* calcd for C<sub>22</sub>H<sub>21</sub>N<sub>2</sub>O<sub>4</sub>S [M+H]<sup>+</sup> 409.1217, found 409.1222.

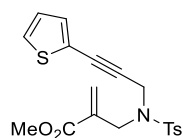

**Methyl 2-(((4-methyl-N-(3-(thiophen-2-yl)prop-2-yn-1-yl)phenyl)sulfonamido)methyl)acrylate (3m)**

White solid (355 mg, 76% on 1.2 mmol scale). mp 78–79 °C. <sup>1</sup>H NMR (400 MHz, CDCl<sub>3</sub>) δ 7.79–7.77 (m, 2H), 7.29 (d, *J* = 8.0 Hz, 2H), 7.20 (dd, *J* = 5.2, 1.2 Hz, 1H),

6.94–6.89 (m, 2H), 6.42 (d,  $J = 1.2$  Hz, 1H), 5.98 (d,  $J = 1.2$  Hz, 1H), 4.33 (s, 2H), 4.12 (s, 2H), 3.77 (s, 3H), 2.38 (s, 3H);  $^{13}\text{C}$  NMR (101 MHz,  $\text{CDCl}_3$ )  $\delta$  166.2, 143.7, 135.8, 134.9, 132.3, 129.7, 127.7, 127.3, 126.7, 121.9, 85.7, 79.1, 52.0, 47.0, 37.9, 21.5. HRMS (ESI):  $m/z$  calcd for  $\text{C}_{19}\text{H}_{20}\text{NO}_4\text{S}_2$   $[\text{M}+\text{H}]^+$  390.0828, found 390.0830.

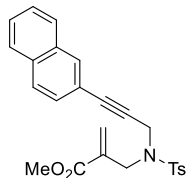

**Methyl 2-(((4-methyl-N-(3-(naphthalen-2-yl)prop-2-yn-1-yl)phenyl)sulfonamido)methyl)acrylate (3n)**

White solid (312 mg, 72% on 1.0 mmol scale). mp 97–98 °C.  $^1\text{H}$  NMR (400 MHz,  $\text{CDCl}_3$ )  $\delta$  7.85–7.83 (m, 2H), 7.80–7.69 (m, 3H), 7.58 (s, 1H), 7.51–7.47 (m, 2H), 7.28 (d,  $J = 8.0$  Hz, 2H), 7.10 (dd,  $J = 8.4, 1.6$  Hz, 1H), 6.45 (d,  $J = 0.8$  Hz, 1H), 6.04 (d,  $J = 1.2$  Hz, 1H), 4.37 (s, 2H), 4.20 (s, 2H), 3.78 (s, 3H), 2.31 (s, 3H);  $^{13}\text{C}$  NMR (101 MHz,  $\text{CDCl}_3$ )  $\delta$  166.3, 143.7, 136.0, 134.9, 132.8, 132.7, 131.5, 129.6, 128.0, 127.9, 127.8, 127.7, 127.5, 126.8, 126.6, 119.3, 86.2, 82.0, 52.1, 47.0, 37.9, 21.5. HRMS (ESI):  $m/z$  calcd for  $\text{C}_{25}\text{H}_{24}\text{NO}_4\text{S}$   $[\text{M}+\text{H}]^+$  434.1421, found 434.1426.

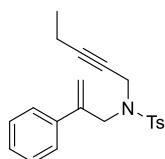

**4-Methyl-N-(pent-2-yn-1-yl)-N-(2-phenylallyl)benzenesulfonamide (3p)**

White solid (697 mg, 67% on 3.0 mmol scale). mp 89–90 °C.  $^1\text{H}$  NMR (400 MHz,  $\text{CDCl}_3$ )  $\delta$  7.76 (d,  $J = 8.4$  Hz, 2H), 7.54 (d,  $J = 7.2$  Hz, 2H), 7.37–7.28 (m, 5H), 5.57 (s, 1H), 5.34 (s, 1H), 4.24 (s, 2H), 3.96 (t,  $J = 2.0$  Hz, 2H), 2.43 (s, 3H), 1.92–1.85 (m, 2H), 0.88 (t,  $J = 7.6$  Hz, 3H);  $^{13}\text{C}$  NMR (101 MHz,  $\text{CDCl}_3$ )  $\delta$  143.3, 141.5, 137.8, 135.8, 129.2, 128.4, 128.04, 128.0, 126.4, 116.9, 87.9, 71.4, 49.9, 36.0, 21.4, 13.5, 12.0. HRMS (ESI):  $m/z$  calcd for  $\text{C}_{21}\text{H}_{24}\text{NO}_2\text{S}$   $[\text{M}+\text{H}]^+$  354.1522, found 354.1527.

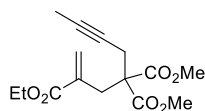

**2-Ethyl 4,4-dimethyl oct-1-en-6-yne-2,4,4-tricarboxylate (3u)**

Colorless oil (531 mg, 75% on 2.4 mmol scale).  $^1\text{H}$  NMR (400 MHz,  $\text{CDCl}_3$ )  $\delta$  6.26 (d,  $J = 1.6$  Hz, 1H), 5.78 (d,  $J = 1.6$  Hz, 1H), 4.10 (q,  $J = 14.4, 7.2$  Hz, 2H), 3.67 (s, 6H), 3.05 (s, 2H), 2.65 (q,  $J = 5.2, 2.4$  Hz, 2H), 1.72 (t,  $J = 2.8$  Hz, 3H), 1.23 (t,  $J = 6.8$  Hz, 3H);  $^{13}\text{C}$  NMR (101 MHz,  $\text{CDCl}_3$ )  $\delta$  170.4, 166.5, 135.5, 129.4, 79.2, 73.4, 60.7, 56.6, 52.5, 33.4, 23.0, 14.0, 3.3. HRMS (ESI):  $m/z$  calcd for  $\text{C}_{15}\text{H}_{21}\text{O}_6$   $[\text{M}+\text{H}]^+$  297.1333, found 297.1339.

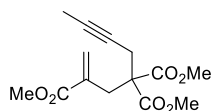

### Trimethyl oct-1-en-6-yne-2,4,4-tricarboxylate (**3v**)

White solid (546 mg, 81% on 2.4 mmol scale). mp 59–60 °C.  $^1\text{H}$  NMR (400 MHz,  $\text{CDCl}_3$ )  $\delta$  6.28–6.27 (m, 1H), 5.80 (s, 1H), 3.68–3.66 (m, 9H), 3.06 (d,  $J = 3.2$  Hz, 2H), 2.67–2.64 (m, 2H), 1.74–1.72 (m, 3H);  $^{13}\text{C}$  NMR (101 MHz,  $\text{CDCl}_3$ )  $\delta$  170.4, 167.0, 135.2, 129.9, 79.3, 73.3, 56.5, 52.6, 51.8, 33.5, 23.0, 3.3. HRMS (ESI):  $m/z$  calcd for  $\text{C}_{14}\text{H}_{19}\text{O}_6$   $[\text{M}+\text{H}]^+$  283.1176, found 283.1180.

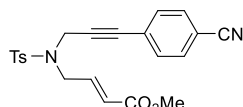

### Methyl (*E*)-4-((*N*-(3-(4-cyanophenyl)prop-2-yn-1-yl)-4-methylphenyl)sulfonamido)but-2-enoate (**3w**)

White solid (129 mg, 72% on 0.5 mmol scale). mp 141–142 °C.  $^1\text{H}$  NMR (400 MHz,  $\text{CDCl}_3$ )  $\delta$  7.78–7.75 (m, 2H), 7.56–7.54 (m, 2H), 7.29–7.27 (m, 2H), 7.19–7.17 (m, 2H), 6.90–6.83 (m, 1H), 6.09–6.05 (m, 1H), 4.32 (s, 2H), 4.04 (dd,  $J = 6.0, 1.6$  Hz, 2H), 3.74 (s, 3H), 2.36 (s, 3H);  $^{13}\text{C}$  NMR (101 MHz,  $\text{CDCl}_3$ )  $\delta$  165.9, 144.0, 141.5, 135.6, 132.0, 131.8, 129.7, 127.8, 126.7, 124.3, 118.1, 112.0, 86.0, 84.4, 51.8, 47.7, 37.5, 21.5. HRMS (ESI):  $m/z$  calcd for  $\text{C}_{22}\text{H}_{21}\text{N}_2\text{O}_4\text{S}$   $[\text{M}+\text{H}]^+$  409.1217, found 409.1214.

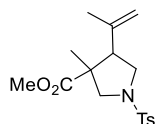

### Methyl 3-methyl-4-(prop-1-en-2-yl)-1-tosylpyrrolidine-3-carboxylate (**2a**)

Prepared with protocol A. **2a** was obtained as a colorless oil after flash chromatography (PE/EA = 10/1) (0.2 mmol, 96%, dr = 1/1).  $^1\text{H}$  NMR (400 MHz,  $\text{CDCl}_3$ )  $\delta$  7.74–7.69 (m, 4H), 7.33–7.31 (m, 4H), 4.87 (s, 1H), 4.76 (s, 1H), 4.63 (s, 1H), 4.57 (s, 1H), 3.73 (d,  $J = 10.4$  Hz, 1H), 3.66 (d,  $J = 9.6$  Hz, 1H), 3.62–3.57 (m, 4H), 3.49 (dd,  $J = 10.0, 8.0$  Hz, 1H), 3.39 (s, 3H), 3.32 (t,  $J = 8.8$  Hz, 2H), 3.25 (dd,  $J = 9.6, 2.4$  Hz, 2H), 3.13 (t,  $J = 8.4$  Hz, 1H), 2.62 (t,  $J = 7.6$  Hz, 1H), 2.42 (s, 6H), 1.57 (d,  $J = 5.6$  Hz, 6H), 1.25 (s, 3H), 0.92 (s, 3H);  $^{13}\text{C}$  NMR (101 MHz,  $\text{CDCl}_3$ )  $\delta$  174.9, 173.6, 143.5, 143.4, 141.5, 140.6, 134.0, 133.8, 129.6, 129.5, 127.5, 127.4, 113.8, 113.76, 58.3, 56.5, 54.5, 52.4, 52.3, 51.6, 51.0, 50.8, 50.6, 49.7, 23.6, 22.7, 22.0, 21.5, 21.4, 16.5. HRMS (ESI):  $m/z$  calcd for  $\text{C}_{17}\text{H}_{24}\text{NO}_4\text{S}$   $[\text{M}+\text{H}]^+$  338.1421, found 338.1418.

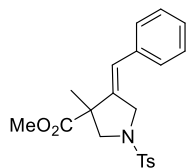

### Methyl (Z)-4-benzylidene-3-methyl-1-tosylpyrrolidine-3-carboxylate (**2b**)

Prepared with protocol A. **2b** was obtained as a colorless oil after flash chromatography (PE/EA = 10/1) (0.2 mmol, 96%). <sup>1</sup>H NMR (400 MHz, CDCl<sub>3</sub>) δ 7.74 (d, *J* = 8.0 Hz, 2H), 7.37–7.32 (m, 4H), 7.28–7.24 (m, 1H), 7.15 (d, *J* = 7.2 Hz, 2H), 6.43 (t, *J* = 2.8 Hz, 1H), 4.26 (dd, *J* = 14.0, 2.0 Hz, 1H), 4.14 (dd, *J* = 14.4, 2.8 Hz, 1H), 3.82 (d, *J* = 9.6 Hz, 1H), 3.62 (s, 3H), 3.15 (d, *J* = 9.6 Hz, 1H), 2.42 (s, 3H), 1.49 (s, 3H); <sup>13</sup>C NMR (101 MHz, CDCl<sub>3</sub>) δ 173.6, 143.7, 139.3, 135.8, 132.9, 129.7, 128.5, 128.3, 127.8, 127.5, 124.5, 56.4, 53.2, 52.6, 50.8, 22.8, 21.5. HRMS (ESI): *m/z* calcd for C<sub>21</sub>H<sub>24</sub>NO<sub>4</sub>S [M+H]<sup>+</sup> 386.1421, found 386.1426.

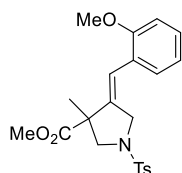

### Methyl (Z)-4-(2-methoxybenzylidene)-3-methyl-1-tosylpyrrolidine-3-carboxylate (**2c**)

Prepared with protocol A. **2c** was obtained as a yellow oily liquid after flash chromatography (PE/EA = 8/1) (0.2 mmol, 89%). <sup>1</sup>H NMR (400 MHz, CDCl<sub>3</sub>) δ 7.72 (d, *J* = 8.4 Hz, 2H), 7.32 (d, *J* = 7.6 Hz, 2H), 7.27–7.23 (m, 1H), 7.04 (dd, *J* = 7.6, 2.0 Hz, 1H), 6.96–6.92 (m, 1H), 6.87–6.85 (m, 1H), 6.69 (t, *J* = 2.4 Hz, 1H), 4.17 (dd, *J* = 14.0, 2.0 Hz, 1H), 4.08 (dd, *J* = 14.0, 2.8 Hz, 1H), 3.83–3.80 (m, 4H), 3.61 (s, 3H), 3.15 (d, *J* = 9.6 Hz, 1H), 2.43 (s, 4H), 1.51 (s, 3H); <sup>13</sup>C NMR (101 MHz, CDCl<sub>3</sub>) δ 173.8, 156.8, 143.6, 139.0, 133.1, 129.7, 129.0, 128.7, 127.8, 124.9, 120.4, 119.6, 110.6, 56.6, 55.5, 53.1, 52.6, 50.8, 22.7, 21.5. HRMS (ESI): *m/z* calcd for C<sub>22</sub>H<sub>26</sub>NO<sub>5</sub>S [M+H]<sup>+</sup> 416.1526, found 416.1531.

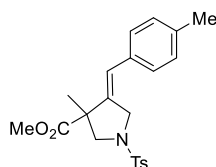

### Methyl (Z)-3-methyl-4-(4-methylbenzylidene)-1-tosylpyrrolidine-3-carboxylate (**2d**)

Prepared with protocol A. **2d** was obtained as a colorless oil after flash chromatography (PE/EA = 8/1) (0.2 mmol, 83%). <sup>1</sup>H NMR (400 MHz, CDCl<sub>3</sub>) δ 7.74 (d, *J* = 8.4 Hz, 2H), 7.33 (d, *J* = 8.0 Hz, 2H), 7.16 (d, *J* = 8.0 Hz, 2H), 7.05 (d, *J* = 8.0

Hz, 2H), 6.39 (t,  $J = 2.4$  Hz, 1H), 4.25 (dd,  $J = 14.4, 2.4$  Hz, 1H), 4.13 (dd,  $J = 14.0, 2.4$  Hz, 1H), 3.81 (d,  $J = 9.6$  Hz, 1H), 3.61 (s, 3H), 3.13 (d,  $J = 9.6$  Hz, 1H), 2.42 (s, 3H), 2.35 (s, 3H), 1.48 (s, 3H);  $^{13}\text{C}$  NMR (101 MHz,  $\text{CDCl}_3$ )  $\delta$  173.7, 143.7, 138.2, 137.4, 133.0, 132.9, 129.7, 129.2, 128.2, 127.8, 124.3, 56.4, 53.1, 52.6, 50.8, 22.8, 21.5, 21.1. HRMS (ESI):  $m/z$  calcd for  $\text{C}_{22}\text{H}_{26}\text{NO}_4\text{S}$   $[\text{M}+\text{H}]^+$  400.1577, found 400.1580.

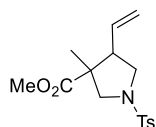

### Methyl 3-methyl-1-tosyl-4-vinylpyrrolidine-3-carboxylate (2e)

Prepared with protocol A. **2e** was obtained as a colorless oil after flash chromatography (PE/EA = 10/1) (0.2 mmol, 85%, dr = 1/0.86).  $^1\text{H}$  NMR (400 MHz,  $\text{CDCl}_3$ )  $\delta$  7.74–7.70 (m, 3.72H), 7.33 (d,  $J = 8.0$  Hz, 3.72H), 5.63–5.54 (m, 0.86H), 5.46–5.37 (m, 1H), 5.12–5.01 (m, 3.72H), 3.68 (d,  $J = 10.4$  Hz, 1H), 3.64–3.57 (m, 4.86H), 3.48 (dd,  $J = 9.6, 7.6$  Hz, 0.86H), 3.40 (s, 2.58H), 3.28–3.09 (m, 3.72H), 3.04 (dd,  $J = 16.0, 7.6$  Hz, 0.86H), 2.58 (dd,  $J = 15.6, 7.8$  Hz, 1H), 2.43 (s, 5.58H), 1.20 (s, 3H), 1.00 (s, 2.58H);  $^{13}\text{C}$  NMR (101 MHz,  $\text{CDCl}_3$ )  $\delta$  174.3, 173.5, 143.6, 143.4, 134.1, 133.8, 133.3, 133.2, 129.7, 129.6, 127.5, 127.4, 118.7, 118.6, 57.0, 56.0, 52.4, 52.3, 52.2, 51.7, 51.4, 51.3, 50.3, 48.4, 21.7, 21.5, 21.48, 17.2. HRMS (ESI):  $m/z$  calcd for  $\text{C}_{16}\text{H}_{22}\text{NO}_4\text{S}$   $[\text{M}+\text{H}]^+$  324.1264, found 324.1270.

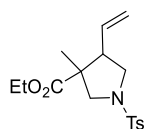

### Ethyl 3-methyl-1-tosyl-4-vinylpyrrolidine-3-carboxylate (2f)

Prepared with protocol A. **2f** was obtained as a colorless oil after flash chromatography (PE/EA = 10/1) (0.2 mmol, 87%, dr = 1/0.72).  $^1\text{H}$  NMR (400 MHz,  $\text{CDCl}_3$ )  $\delta$  7.72–7.69 (m, 3.44H), 7.31 (d,  $J = 8.4$  Hz, 3.44H), 5.62–5.53 (m, 0.72H), 5.48–5.39 (m, 1H), 5.10–4.99 (m, 3.44H), 4.09–3.83 (m, 3.44H), 3.73–3.57 (m, 2.72H), 3.48 (dd,  $J = 10.0, 8.0$  Hz, 0.72H), 3.27–3.08 (m, 3.44H), 3.03 (dd,  $J = 16.0, 7.6$  Hz, 0.72H), 2.55 (dd,  $J = 15.6, 7.6$  Hz, 1H), 2.41 (s, 5.16H), 1.19–1.14 (m, 5.16H), 1.05 (t,  $J = 7.2$  Hz, 3H), 0.97 (s, 2.16H);  $^{13}\text{C}$  NMR (101 MHz,  $\text{CDCl}_3$ )  $\delta$  173.7, 172.9, 143.5, 143.4, 134.1, 133.8, 133.3, 133.2, 129.6, 129.5, 127.4, 127.36, 118.5, 118.47, 61.1, 60.7, 57.0, 55.9, 52.3, 52.0, 51.4, 51.2, 50.3, 48.3, 21.8, 21.4, 21.42, 17.1, 14.0, 13.95. HRMS (ESI):  $m/z$  calcd for  $\text{C}_{17}\text{H}_{24}\text{NO}_4\text{S}$   $[\text{M}+\text{H}]^+$  338.1421, found 338.1423.

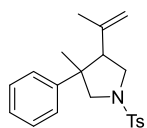

### 3-Methyl-3-phenyl-4-(prop-1-en-2-yl)-1-tosylpyrrolidine (2g)

Prepared with protocol A. **2g** was obtained as a colorless oil after flash chromatography (PE/EA = 10/1) (0.2 mmol, 96%, dr = 1/0.55). <sup>1</sup>H NMR (400 MHz, CDCl<sub>3</sub>) δ 7.81–7.76 (m, 3.1H), 7.36 (d, *J* = 8.0 Hz, 3.1H), 7.28–7.26 (m, 4H), 7.23–7.17 (m, 2.75H), 7.14–7.12 (m, 1H), 4.79 (s, 1H), 4.66 (t, *J* = 1.6 Hz, 0.55H), 4.54 (s, 1.55H), 3.89 (d, *J* = 9.6 Hz, 0.55H), 3.66–3.60 (m, 2.55H), 3.46 (t, *J* = 10.0 Hz, 1H), 3.41–3.30 (m, 2.1H), 2.98 (t, *J* = 8.8 Hz, 1H), 2.66 (t, *J* = 7.6 Hz, 0.55H), 2.46–2.45 (m, 4.65H), 1.31 (s, 1.65H), 1.23 (s, 3H), 1.09 (s, 3H), 0.97 (s, 1.65H); <sup>13</sup>C NMR (101 MHz, CDCl<sub>3</sub>) δ 144.3, 143.4, 142.8, 142.5, 141.2, 134.2, 134.1, 129.7, 129.66, 128.3, 127.9, 127.3, 127.31, 126.6, 126.56, 126.4, 126.0, 115.0, 112.9, 62.3, 59.0, 55.8, 54.7, 50.7, 50.1, 48.6, 47.2, 28.0, 26.8, 23.6, 21.5, 21.48, 20.4, 19.1. HRMS (ESI): *m/z* calcd for C<sub>21</sub>H<sub>26</sub>NO<sub>2</sub>S [M+H]<sup>+</sup> 356.1679, found 356.1685.

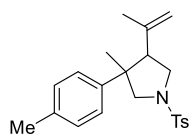

### 3-Methyl-4-(prop-1-en-2-yl)-3-(p-tolyl)-1-tosylpyrrolidine (**2h**)

Prepared with protocol A. **2h** was obtained as a colorless oil after flash chromatography (PE/EA = 20/1) (0.2 mmol, 99%, dr = 1/0.52). <sup>1</sup>H NMR (400 MHz, CDCl<sub>3</sub>) δ 7.81–7.76 (m, 3.04H), 7.36 (d, *J* = 8.0 Hz, 3.04H), 7.15 (d, *J* = 8.4 Hz, 2H), 7.08 (d, *J* = 8.0 Hz, 2H), 7.02 (s, 2.08H), 4.79 (s, 1H), 4.67 (t, *J* = 1.6 Hz, 0.52H), 4.54 (s, 1.52H), 3.87 (d, *J* = 9.6 Hz, 0.52H), 3.65–3.59 (m, 2.52H), 3.46 (t, *J* = 10.0 Hz, 1H), 3.39–3.30 (m, 2.04H), 2.96 (t, *J* = 8.8 Hz, 1H), 2.63 (t, *J* = 7.6 Hz, 0.52H), 2.46 (s, 3H), 2.45 (s, 1.56H), 2.30 (s, 3H), 2.29 (s, 1.56H), 1.29 (s, 1.56H), 1.25 (s, 3H), 1.07 (s, 3H), 1.00 (s, 1.56H); <sup>13</sup>C NMR (101 MHz, CDCl<sub>3</sub>) δ 143.4, 142.6, 141.3, 141.2, 139.7, 136.1, 135.9, 134.3, 134.2, 129.7, 129.6, 129.0, 128.6, 127.34, 127.3, 126.5, 125.9, 114.8, 112.7, 62.3, 59.1, 55.8, 54.6, 50.7, 50.1, 48.3, 46.9, 28.0, 23.6, 21.5, 20.8, 20.75, 20.5, 19.1. HRMS (ESI): *m/z* calcd for C<sub>22</sub>H<sub>28</sub>NO<sub>2</sub>S [M+H]<sup>+</sup> 370.1835, found 370.1839.

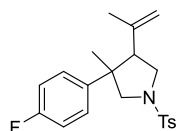

### 3-(4-Fluorophenyl)-3-methyl-4-(prop-1-en-2-yl)-1-tosylpyrrolidine (**2i**)

Prepared with protocol A. **2i** was obtained as a colorless oil after flash chromatography (PE/EA = 20/1) (0.2 mmol, 98%, dr = 1/0.58). <sup>1</sup>H NMR (400 MHz, CDCl<sub>3</sub>) δ 7.80–7.75 (m, 3.16H), 7.36 (d, *J* = 8.0 Hz, 3.16H), 7.27–7.22 (m, 2H), 7.14–7.10 (m, 1.16H), 6.98 – 6.88 (m, 3.16H), 4.80 (s, 1H), 4.69 (t, *J* = 1.2 Hz, 0.58H), 4.53 (s, 1.58H), 3.85 (d, *J* = 9.6 Hz, 0.58H), 3.64–3.58 (m, 2.58H), 3.44 (t, *J* = 10.0 Hz, 1H), 3.37–3.34 (m, 1.58H), 3.30 (dd, *J* = 10.4, 8.0 Hz, 0.58H), 2.93 (t, *J* =

8.8 Hz, 1H), 2.62 (t,  $J = 8.0$  Hz, 0.58H), 2.46 (s, 3H), 2.45 (s, 1.74H), 1.30 (s, 1.74H), 1.25 (s, 3H), 1.07 (s, 3H), 1.01 (s, 1.74H);  $^{13}\text{C}$  NMR (101 MHz,  $\text{CDCl}_3$ )  $\delta$  161.3 (d,  $J_{\text{C-F}} = 244.4$  Hz), 143.5, 143.51, 142.1, 141.0, 140.1 (d,  $J_{\text{C-F}} = 3.2$  Hz), 138.5 (d,  $J_{\text{C-F}} = 3.3$  Hz), 134.1, 134.06, 129.7, 129.69, 128.2 (d,  $J_{\text{C-F}} = 7.7$  Hz), 127.7 (d,  $J_{\text{C-F}} = 7.9$  Hz), 127.3, 127.31, 115.2, 115.1 (d,  $J_{\text{C-F}} = 20.8$  Hz) 114.7 (d,  $J_{\text{C-F}} = 21$  Hz), 113.1, 62.2, 59.2, 55.8, 54.9, 50.5, 50.1, 48.2, 46.9, 29.6, 27.9, 23.6, 21.5, 20.6, 19.3;  $^{19}\text{F}$  NMR (376 MHz,  $\text{CDCl}_3$ )  $\delta$  -116.3. HRMS (ESI):  $m/z$  calcd for  $\text{C}_{21}\text{H}_{25}\text{FNO}_2\text{S}$   $[\text{M}+\text{H}]^+$  374.1585, found 374.1588.

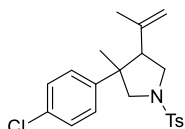

### 3-(4-Chlorophenyl)-3-methyl-4-(prop-1-en-2-yl)-1-tosylpyrrolidine (2j)

Prepared with protocol A. **2j** was obtained as a white solid after flash chromatography (PE/EA = 20/1) (0.2 mmol, 99%, dr = 1/0.55). mp 150–151 °C.  $^1\text{H}$  NMR (400 MHz,  $\text{CDCl}_3$ )  $\delta$  7.80–7.75 (m, 3.1H), 7.36 (d,  $J = 8.0$  Hz, 3.1H), 7.27–7.17 (m, 5.1H), 7.09–7.07 (m, 1.1H), 4.81 (s, 1H), 4.69 (t,  $J = 1.2$  Hz, 0.55H), 4.54 (s, 1.55H), 3.83 (d,  $J = 9.6$  Hz, 0.55H), 3.65–3.57 (m, 2.55H), 3.44 (t,  $J = 10.0$  Hz, 1H), 3.38–3.28 (m, 2.1H), 2.93 (t,  $J = 8.8$  Hz, 1H), 2.64 (t,  $J = 7.6$  Hz, 0.55H), 2.46 (s, 3H), 2.45 (s, 1.65H), 1.29 (s, 1.65H), 1.26 (s, 3H), 1.07 (s, 3H), 1.02 (s, 1.65H);  $^{13}\text{C}$  NMR (101 MHz,  $\text{CDCl}_3$ )  $\delta$  143.5, 143.1, 142.0, 141.3, 140.9, 134.1, 134.0, 132.4, 132.3, 129.7, 129.69, 128.4, 128.1, 128.0, 127.5, 127.33, 127.3, 115.3, 113.2, 62.1, 59.0, 55.7, 54.8, 50.5, 50.1, 48.3, 47.0, 27.9, 23.6, 21.5, 20.6, 19.2. HRMS (ESI):  $m/z$  calcd for  $\text{C}_{21}\text{H}_{25}\text{ClNO}_2\text{S}$   $[\text{M}+\text{H}]^+$  390.1289, found 390.1294.

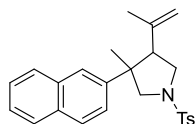

### 3-Methyl-3-(naphthalen-2-yl)-4-(prop-1-en-2-yl)-1-tosylpyrrolidine (2k)

Prepared with protocol A. **2k** was obtained as a colorless oil after flash chromatography (PE/EA = 20/1) (0.2 mmol, 95%, dr = 1/0.32).  $^1\text{H}$  NMR (400 MHz,  $\text{CDCl}_3$ )  $\delta$  7.85–7.65 (m, 7.6H), 7.53 (d,  $J = 1.6$  Hz, 0.32H), 7.47–7.34 (m, 6.28H), 7.29 (dd,  $J = 8.4, 2.0$  Hz, 0.32H), 4.80 (s, 1H), 4.64 (t,  $J = 1.6$  Hz, 0.32H), 4.59 (s, 0.32H), 4.58 (s, 1H), 4.03 (d,  $J = 10.0$  Hz, 0.32H), 3.75 (d,  $J = 10.4$  Hz, 1H), 3.72–3.65 (m, 1.32H), 3.54–3.49 (m, 1.32H), 3.43–3.36 (m, 1.32H), 3.12 (t,  $J = 8.4$  Hz, 1H), 2.79 (t,  $J = 7.2$  Hz, 0.32H), 2.45 (s, 3H), 2.44 (s, 0.96H), 1.37 (s, 0.96H), 1.23 (s, 3H), 1.19 (s, 3H), 1.00 (s, 0.96H);  $^{13}\text{C}$  NMR (101 MHz,  $\text{CDCl}_3$ )  $\delta$  143.5, 142.7, 141.7, 141.3, 140.5, 134.4, 134.1, 133.0, 132.9, 132.0, 131.9, 129.7, 129.68, 128.1, 127.9, 127.4, 127.3, 127.28, 126.1, 125.9, 125.7, 125.5, 124.9, 124.7, 124.2, 115.1, 112.9,



62.0, 58.9, 55.8, 54.3, 50.9, 50.2, 48.9, 47.5, 28.5, 23.7, 21.5, 21.47, 20.6, 19.4. HRMS (ESI):  $m/z$  calcd for  $C_{25}H_{28}NO_2S$   $[M+H]^+$  406.1832, found 406.1839.

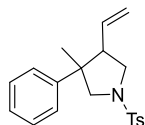

### 3-Methyl-3-phenyl-1-tosyl-4-vinylpyrrolidine (2l)

Prepared with protocol A. **2l** was obtained as a colorless oil after flash chromatography (PE/EA = 20/1) (0.2 mmol, 89%, dr = 1/0.5).  $^1H$  NMR (400 MHz,  $CDCl_3$ )  $\delta$  7.79 (d,  $J$  = 8.4 Hz, 1H), 7.76 (d,  $J$  = 8.0 Hz, 2H), 7.37–7.33 (m, 3H), 7.30–7.18 (m, 6.5H), 7.11–7.09 (m, 1H), 5.66–5.57 (m, 1H), 5.10–5.06 (m, 1H), 5.01 (t,  $J$  = 1.2 Hz, 0.5H), 4.96 (t,  $J$  = 1.2, 0.5 Hz, 1H), 4.95–4.92 (m, 1H), 4.89–4.85 (m, 0.5H), 3.83 (d,  $J$  = 9.6 Hz, 0.5H), 3.64–3.54 (m, 1.5H), 3.51 (s, 2H), 3.38 (d,  $J$  = 9.6 Hz, 0.5H), 3.30 (t,  $J$  = 9.6 Hz, 1H), 3.19 (dd,  $J$  = 10.0, 7.2 Hz, 0.5H), 2.94 (dd,  $J$  = 17.2, 8.0 Hz, 1H), 2.57–2.51 (m, 0.5H), 2.45 (s, 1.5H), 2.44 (s, 3H), 1.28 (s, 1.5H), 1.13 (s, 3H);  $^{13}C$  NMR (101 MHz,  $CDCl_3$ )  $\delta$  144.4, 143.4, 142.4, 135.1, 134.3, 134.0, 133.9, 129.7, 129.66, 128.4, 128.0, 127.3, 127.31, 126.85, 126.6, 126.4, 125.7, 118.3, 117.5, 60.6, 58.6, 53.1, 51.5, 51.4, 50.9, 48.6, 47.7, 26.3, 21.5, 20.9. HRMS (ESI):  $m/z$  calcd for  $C_{20}H_{24}NO_2S$   $[M+H]^+$  342.1522, found 342.1530.

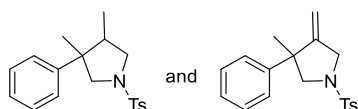

### 3,4-Dimethyl-3-phenyl-1-tosylpyrrolidine (2m) and 3-Methyl-4-methylene-3-phenyl-1-tosylpyrrolidine (2m')

Prepared with protocol A. **2m** and **2m'** mixture were obtained as a colorless oil after flash chromatography (PE/EA = 10/1) (0.2 mmol, 35%, **2m/2m'** = 1/1).  $^1H$  NMR (400 MHz,  $CDCl_3$ )  $\delta$  7.72 (d,  $J$  = 8.0 Hz, 2H), 7.60 (d,  $J$  = 8.4 Hz, 2H), 7.33–7.17 (m, 14H), 5.08 (t,  $J$  = 2.0 Hz, 1H), 4.88 (t,  $J$  = 2.4 Hz, 1H), 3.99–3.90 (m, 2H), 3.74 (d,  $J$  = 9.6 Hz, 1H), 3.57 (dd,  $J$  = 10.0, 8.0 Hz, 1H), 3.42 (s, 2H), 3.21 (d,  $J$  = 9.6 Hz, 1H), 3.03 (t,  $J$  = 10.0 Hz, 1H), 2.43–2.40 (m, 7H), 1.42 (s, 3H), 1.08 (s, 3H), 0.82 (d,  $J$  = 6.8 Hz, 3H);  $^{13}C$  NMR (101 MHz,  $CDCl_3$ )  $\delta$  151.7, 144.2, 144.1, 143.4, 143.3, 134.3, 133.1, 129.6, 129.58, 128.4, 128.37, 127.6, 127.4, 126.6, 126.5, 126.3, 125.8, 108.4, 61.3, 61.27, 53.4, 52.3, 50.2, 47.3, 42.0, 25.5, 21.52, 21.50, 19.2, 11.8. HRMS (ESI):  $m/z$  calcd for  $C_{19}H_{24}NO_2S$   $[M+H]^+$  330.1522, found 330.1525 (**2m**). HRMS (ESI):  $m/z$  calcd for  $C_{19}H_{22}NO_2S$   $[M+H]^+$  328.1366, found 328.1369 (**2m'**).

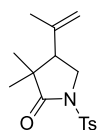

### 3,3-Dimethyl-4-(prop-1-en-2-yl)-1-tosylpyrrolidin-2-one (2n)

Prepared with protocol A. **2n** was obtained as a colorless oil after flash chromatography (PE/EA = 10/1) (0.2 mmol, 75%). <sup>1</sup>H NMR (400 MHz, CDCl<sub>3</sub>) δ 7.92–7.89 (m, 2H), 7.31 (d, *J* = 8.0 Hz, 2H), 4.93 (t, *J* = 1.6 Hz, 1H), 4.73 (d, *J* = 0.8 Hz, 1H), 3.93 (dd, *J* = 10.0, 7.2 Hz, 1H), 3.67 (dd, *J* = 10.0, 8.0 Hz, 1H), 2.60 (t, *J* = 7.6 Hz, 1H), 2.41 (s, 3H), 1.66 (s, 3H), 1.16 (s, 3H), 0.80 (s, 3H); <sup>13</sup>C NMR (101 MHz, CDCl<sub>3</sub>) δ 177.5, 145.1, 140.8, 134.9, 129.6, 127.9, 114.3, 49.4, 47.1, 45.1, 24.4, 22.5, 21.6, 18.5. HRMS (ESI): *m/z* calcd for C<sub>16</sub>H<sub>22</sub>NO<sub>3</sub>S [M+H]<sup>+</sup> 308.1315, found 308.1316.

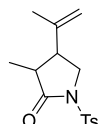

### 3-Methyl-4-(prop-1-en-2-yl)-1-tosylpyrrolidin-2-one (**2o**)

Prepared with protocol A. **2o** was obtained as a white solid after flash chromatography (PE/EA = 10/1) (0.2 mmol, 29%). mp 108–109 °C. <sup>1</sup>H NMR (400 MHz, CDCl<sub>3</sub>) δ 7.94–7.91 (m, 2H), 7.35–7.32 (m, 2H), 4.93–4.91 (m, 1H), 4.83 (d, *J* = 1.2 Hz, 1H), 4.03 (dd, *J* = 9.6, 7.6 Hz, 1H), 3.44 (t, *J* = 10.0 Hz, 1H), 2.60–2.53 (m, 1H), 2.45–2.37 (m, 4H), 1.72 (s, 3H), 1.10 (d, *J* = 6.8 Hz, 3H); <sup>13</sup>C NMR (101 MHz, CDCl<sub>3</sub>) δ 174.8, 145.1, 140.9, 135.2, 129.7, 128.0, 113.8, 49.3, 47.8, 41.7, 21.7, 19.7, 13.3. HRMS (ESI): *m/z* calcd for C<sub>15</sub>H<sub>20</sub>NO<sub>3</sub>S [M+H]<sup>+</sup> 294.1158, found 294.1162.

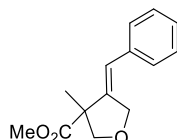

### Methyl (*Z*)-4-benzylidene-3-methyltetrahydrofuran-3-carboxylate (**2p**)

Prepared with protocol A. **2p** was obtained as a colorless oil after flash chromatography (PE/EA = 20/1) (0.2 mmol, 37%). <sup>1</sup>H NMR (400 MHz, CDCl<sub>3</sub>) δ 7.38–7.34 (m, 2H), 7.25–7.22 (m, 1H), 7.16 (d, *J* = 7.2 Hz, 2H), 6.46 (t, *J* = 2.4 Hz, 1H), 4.79–4.69 (m, 2H), 4.41 (d, *J* = 8.8 Hz, 1H), 3.74 (s, 3H), 3.66 (d, *J* = 8.4 Hz, 1H), 1.51 (s, 3H); <sup>13</sup>C NMR (101 MHz, CDCl<sub>3</sub>) δ 174.5, 144.2, 136.7, 128.6, 128.2, 127.1, 122.3, 76.8, 70.7, 53.9, 52.6, 22.3. HRMS (ESI): *m/z* calcd for C<sub>14</sub>H<sub>17</sub>O<sub>3</sub> [M+H]<sup>+</sup> 233.1172, found 233.1178.

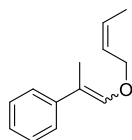

### 4-Ethylidene-3-methyl-3-phenyltetrahydrofuran (**2q**)

Prepared with protocol A. **2q** was obtained as a colorless oil after flash chromatography (PE/EA = 40/1) (0.2 mmol, 95%). <sup>1</sup>H NMR (400 MHz, CDCl<sub>3</sub>) δ 7.61 (d, *J* = 8.0 Hz, 0.54H), 7.30–7.21 (m, 4.54H), 7.15–7.12 (m, 1.27H), 6.46 (d, *J* =

1.2 Hz, 1H), 6.16 (s, 0.27H), 5.80–5.68 (m, 1.27H), 5.66–5.57 (m, 1.27H), 4.40 (dd,  $J = 14.8, 6.4$  Hz, 0.54H), 4.25 (dd,  $J = 15.2, 6.4$  Hz, 2H), 1.97 (d,  $J = 0.8$  Hz, 3H), 1.88 (d,  $J = 0.8$  Hz, 0.81H), 1.70 (d,  $J = 6.4$  Hz, 4.81H);  $^{13}\text{C}$  NMR (101 MHz,  $\text{CDCl}_3$ )  $\delta$  143.4, 142.9, 140.8, 138.4, 130.23, 129.98, 128.3, 127.8, 127.4, 126.89, 126.86, 125.85, 125.76, 125.0, 114.7, 114.3, 73.2, 72.9, 18.4, 17.8, 13.3, 12.7. HRMS (ESI):  $m/z$  calcd for  $\text{C}_{13}\text{H}_{17}\text{O}$   $[\text{M} + \text{H}]^+$  189.1274, found 189.1276.

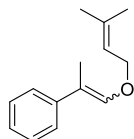

**(1-((3-Methylbut-2-en-1-yl)oxy)prop-1-en-2-yl)benzene (2r)**

Prepared with protocol A. **2r** was obtained as a colorless oil after flash chromatography (PE/EA = 40/1) (0.2 mmol, 77%).  $^1\text{H}$  NMR (400 MHz,  $\text{CDCl}_3$ )  $\delta$  7.66–7.63 (m, 0.94H), 7.33–7.26 (m, 4.94H), 7.19–7.15 (m, 1.47H), 6.51 (dd,  $J = 2.4, 1.2$  Hz, 1H), 6.20 (d,  $J = 2.8, 1.6$  Hz, 0.47H), 5.44–5.40 (m, 1.47H), 4.38 (d,  $J = 6.8$  Hz, 2H), 4.34 (d,  $J = 6.8$  Hz, 0.94H), 2.00 (d,  $J = 1.2$  Hz, 3H), 1.92 (d,  $J = 1.6$  Hz, 1.41H), 1.78–1.77 (m, 4.41H), 1.73–1.71 (m, 4.41H);  $^{13}\text{C}$  NMR (101 MHz,  $\text{CDCl}_3$ )  $\delta$  143.6, 143.1, 140.9, 138.5, 137.9, 137.6, 128.3, 127.8, 127.4, 125.8, 125.7, 124.9, 120.5, 120.4, 114.4, 110.5, 69.1, 68.8, 25.8, 25.79, 18.4, 18.2, 12.7. HRMS (ESI):  $m/z$  calcd for  $\text{C}_{14}\text{H}_{19}\text{O}$   $[\text{M} + \text{H}]^+$  203.1430, found 203.1426.

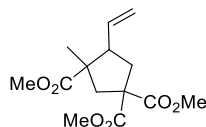

**Trimethyl 3-methyl-4-vinylcyclopentane-1,1,3-tricarboxylate (2s)**

Prepared with protocol A. **2s** was obtained as a colorless oil after flash chromatography (PE/EA = 12/1) (0.2 mmol, 92%, dr = 1/0.8).  $^1\text{H}$  NMR (400 MHz,  $\text{CDCl}_3$ )  $\delta$  5.77–5.68 (m, 0.8H), 5.65–5.56 (m, 1H), 5.08–5.02 (m, 3.6H), 3.73–3.71 (m, 10.8H), 3.66 (s, 2.4H), 3.58 (s, 3H), 3.08–3.01 (m, 0.8H), 2.91 (d,  $J = 14.4$  Hz, 1H), 2.82 (d,  $J = 14.0$  Hz, 0.8H), 2.56–2.46 (m, 2.8H), 2.39–2.31 (m, 1.8H), 2.25–2.14 (m, 1.8H), 1.26 (s, 3H), 1.07 (s, 2.4H);  $^{13}\text{C}$  NMR (101 MHz,  $\text{CDCl}_3$ )  $\delta$  176.5, 175.6, 173.4, 172.4, 172.0, 135.9, 135.7, 117.0, 116.8, 58.6, 57.8, 54.6, 52.9, 52.93, 52.87, 52.85, 52.7, 52.0, 51.9, 51.5, 49.7, 44.8, 44.7, 38.8, 37.4, 22.7, 18.9. HRMS (ESI):  $m/z$  calcd for  $\text{C}_{14}\text{H}_{21}\text{O}_6$   $[\text{M} + \text{H}]^+$  285.1333, found 285.1336.

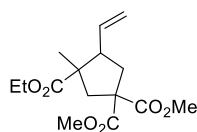

**3-Ethyl 1,1-dimethyl 3-methyl-4-vinylcyclopentane-1,1,3-tricarboxylate (2t)**

Prepared with protocol A. **2t** was obtained as a colorless oil after flash chromatography (PE/EA = 12/1) (0.2 mmol, 84%, dr = 1/0.5).  $^1\text{H}$  NMR (400 MHz,  $\text{CDCl}_3$ )  $\delta$  5.77–5.59 (m, 1.5H), 5.08–5.02 (m, 3H), 4.14–4.01 (m, 3H), 3.73–3.71 (m, 9H), 3.08–3.01 (m, 0.5H), 2.92 (d,  $J = 14.4$  Hz, 1H), 2.83 (d,  $J = 14.4$  Hz, 0.5H), 2.58–2.47 (m, 2.5H), 2.36–2.31 (m, 1.5H), 2.25–2.14 (m, 1.5H), 1.26 (s, 3H), 1.24–1.17 (m, 4.5H), 1.07 (s, 1.5H);  $^{13}\text{C}$  NMR (101 MHz,  $\text{CDCl}_3$ )  $\delta$  176.0, 175.1, 173.5, 172.5, 172.4, 172.0, 136.0, 135.7, 117.0, 116.7, 60.7, 60.5, 58.7, 57.8, 54.5, 52.9, 52.86, 52.8, 52.76, 52.7, 51.8, 49.6, 44.7, 44.67, 38.9, 37.5, 29.6, 22.8, 18.9, 14.1. HRMS (ESI):  $m/z$  calcd for  $\text{C}_{15}\text{H}_{23}\text{O}_6$   $[\text{M}+\text{H}]^+$  299.1489, found 299.1491.

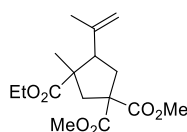

### 3-Ethyl 1,1-dimethyl 3-methyl-4-(prop-1-en-2-yl)cyclopentane-1,1,3-tricarboxylate (**2u**)

Prepared with protocol A. **2u** was obtained as a colorless oil after flash chromatography (PE/EA = 10/1) (0.2 mmol, 98%, dr = 1/0.5).  $^1\text{H}$  NMR (400 MHz,  $\text{CDCl}_3$ )  $\delta$  4.85 (s, 0.5H), 4.82 (s, 1H), 4.74 (s, 1H), 4.69 (s, 0.5H), 4.13 (q,  $J = 14.4$ , 7.2 Hz, 1H), 4.01 (q,  $J = 14.4$ , 7.2 Hz, 2H), 3.74–3.71 (m, 9H), 3.16 (dd,  $J = 13.2$ , 6.0 Hz, 0.5H), 2.92 (d,  $J = 14.4$  Hz, 1H), 2.81 (d,  $J = 14.0$  Hz, 0.5H), 2.72 (t,  $J = 13.2$  Hz, 1H), 2.55–2.47 (m, 1.5H), 2.35–2.23 (m, 3H), 1.69 (s, 3H), 1.59 (s, 1.5H), 1.36 (s, 3H), 1.24 (t,  $J = 7.2$  Hz, 1.5H), 1.18 (t,  $J = 7.2$  Hz, 3H), 1.01 (s, 1.5H);  $^{13}\text{C}$  NMR (101 MHz,  $\text{CDCl}_3$ )  $\delta$  176.9, 175.5, 173.5, 172.4, 172.3, 172.0, 142.7, 142.3, 112.7, 112.3, 60.8, 60.5, 58.1, 57.6, 56.4, 52.9, 52.8, 52.81, 52.6, 52.3, 52.1, 50.3, 46.5, 45.2, 38.3, 36.8, 24.3, 23.0, 22.4, 18.5, 14.0, 13.96. HRMS (ESI):  $m/z$  calcd for  $\text{C}_{16}\text{H}_{25}\text{O}_6$   $[\text{M}+\text{H}]^+$  313.1646, found 313.1647.

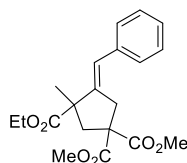

### 3-Ethyl 1,1-dimethyl (*E*)-4-Benzylidene-3-methylcyclopentane-1,1,3-tricarboxylate (**2v**)

Prepared with protocol A. **2v** was obtained as a colorless oil after flash chromatography (PE/EA = 15/1) (0.2 mmol, 26%).  $^1\text{H}$  NMR (400 MHz,  $\text{CDCl}_3$ )  $\delta$  7.36–7.28 (m, 4H), 7.24–7.21 (m, 1H), 6.44 (t,  $J = 2.4$  Hz, 1H), 4.12 (q,  $J = 14.0$ , 7.2 Hz, 2H), 3.75 (s, 3H), 3.70 (s, 3H), 3.49 (dd,  $J = 17.2$ , 2.8 Hz, 1H), 3.23 (dd,  $J = 17.2$ , 2.0 Hz, 1H), 3.10 (d,  $J = 14.0$  Hz, 1H), 2.41 (d,  $J = 14.0$  Hz, 1H), 1.48 (s, 3H), 1.23 (t,  $J = 7.2$  Hz, 3H);  $^{13}\text{C}$  NMR (101 MHz,  $\text{CDCl}_3$ )  $\delta$  175.1, 172.2, 171.7, 144.4, 137.2,

128.6, 128.3, 126.8, 124.4, 61.2, 58.9, 53.6, 53.0, 52.9, 43.7, 38.8, 24.8, 14.0. HRMS (ESI):  $m/z$  calcd for  $C_{20}H_{25}O_6$   $[M + H]^+$  361.1646, found 356.1654.

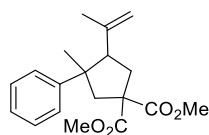

**Dimethyl 3-methyl-3-phenyl-4-(prop-1-en-2-yl)cyclopentane-1,1-dicarboxylate (2w)**

Prepared with protocol A. **2w** was obtained as a colorless oil after flash chromatography (PE/EA = 10/1) (0.2 mmol, 99%, dr = 1/0.64).  $^1H$  NMR (400 MHz,  $CDCl_3$ )  $\delta$  7.48–7.45 (m, 1.28H), 7.33–7.29 (m, 1.28H), 7.26–7.16 (m, 5.64H), 4.77 (s, 0.64H), 4.68 (t,  $J$  = 1.6 Hz, 1H), 4.62 (s, 1.64H), 3.79–3.76 (m, 9.84H), 3.06–2.99 (m, 1.64H), 2.87 (d,  $J$  = 14.8 Hz, 0.64H), 2.72–2.65 (m, 2.64H), 2.50–2.42 (m, 3.28H), 1.53 (s, 3H), 1.23 (s, 1.92H), 1.17 (s, 1.92H), 1.06 (s, 3H);  $^{13}C$  NMR (101 MHz,  $CDCl_3$ )  $\delta$  173.6, 173.3, 173.0, 172.6, 148.0, 145.9, 144.0, 143.4, 128.1, 127.6, 127.1, 126.3, 125.9, 125.8, 113.3, 111.7, 58.3, 57.3, 57.0, 56.4, 52.9, 52.8, 52.76, 51.3, 49.0, 47.8, 47.6, 38.0, 37.6, 29.8, 23.6, 20.9, 20.4. HRMS (ESI):  $m/z$  calcd for  $C_{21}H_{26}NO_2S$   $[M+H]^+$  356.1679, found 356.1684.

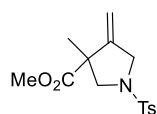

**Methyl 3-methyl-4-methylene-1-tosylpyrrolidine-3-carboxylate (4a)**

Prepared with protocol B. **4a** was obtained as a colorless oil after flash chromatography (PE/EA = 10/1) (0.2 mmol, 67%).  $^1H$  NMR (400 MHz,  $CDCl_3$ )  $\delta$  7.71 (d,  $J$  = 8.4 Hz, 2H), 7.34 (d,  $J$  = 8.0 Hz, 2H), 5.11 (t,  $J$  = 2.0 Hz, 1H), 5.05 (t,  $J$  = 2.0 Hz, 1H), 3.96 (dt,  $J$  = 13.6, 2.0 Hz, 1H), 3.83 (dt,  $J$  = 13.6, 2.4 Hz, 1H), 3.75 (d,  $J$  = 10 Hz, 1H), 3.59 (s, 3H), 3.16 (d,  $J$  = 9.6 Hz, 1H), 2.44 (s, 3H), 1.38 (s, 3H);  $^{13}C$  NMR (101 MHz,  $CDCl_3$ )  $\delta$  173.4, 147.2, 143.8, 132.7, 129.7, 127.9, 109.0, 57.4, 52.6, 52.1, 52.08, 22.8, 21.5. HRMS (ESI):  $m/z$  calcd for  $C_{15}H_{20}NO_4S$   $[M+H]^+$  310.1108, found 310.1105.

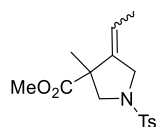

**Methyl 4-ethylidene-3-methyl-1-tosylpyrrolidine-3-carboxylate (4b)**

Prepared with protocol B. **4b** was obtained as a colorless oil after flash chromatography (PE/EA = 10/1) (0.2 mmol, 83%,  $E/Z$  = 1/0.5).  $^1H$  NMR (400 MHz,  $CDCl_3$ )  $\delta$  7.72–7.66 (m, 3H), 7.34–7.32 (m, 3H), 5.50–5.44 (m, 0.5H), 5.41–5.34 (m, 1H), 3.97–3.93 (m, 1.5H), 3.75–3.71 (m, 1H), 3.65–3.61 (m, 4H), 3.57 (s, 1.5H), 3.35 (d,  $J$  = 9.6 Hz, 1H), 3.29 (d,  $J$  = 9.2 Hz, 1H), 3.10 (d,  $J$  = 9.6 Hz, 0.5H), 2.43 (s, 4.5H),

1.56–1.54 (m, 1.5H), 1.52–1.49 (m, 3H), 1.42 (s, 3H), 1.34 (s, 1.5H); <sup>13</sup>C NMR (101 MHz, CDCl<sub>3</sub>) δ 174.2, 173.8, 143.8, 143.7, 138.8, 138.7, 132.7, 131.9, 129.6, 129.63, 128.0, 127.8, 119.4, 119.2, 56.0, 57.4, 53.3, 52.4, 52.41, 51.8, 50.8, 49.5, 23.0, 21.8, 21.5, 14.6, 13.4. HRMS (ESI): *m/z* calcd for C<sub>16</sub>H<sub>22</sub>NO<sub>4</sub>S [M+H]<sup>+</sup> 324.1264, found 324.1271.

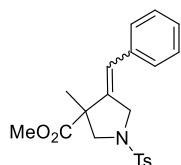

#### Methyl 4-benzylidene-3-methyl-1-tosylpyrrolidine-3-carboxylate (**4c**)

Prepared with protocol B. **4c** was obtained as a white solid after flash chromatography (PE/EA = 10/1) (0.2 mmol, 62%, *E/Z* = 1/0.1). mp 68–69 °C. <sup>1</sup>H NMR (400 MHz, CDCl<sub>3</sub>) δ 7.77–7.73 (m, 2.2H), 7.38–7.34 (m, 2.2H), 7.30–7.20 (m, 3.3H), 7.17 (d, *J* = 7.6 Hz, 0.2H), 7.07 (d, *J* = 7.2 Hz, 2H), 6.49 (s, 1H), 6.44 (t, *J* = 2.4 Hz, 0.1H), 4.27 (dd, *J* = 14.4, 2.4 Hz, 0.1H), 4.20–4.13 (m, 1.1H), 4.03 (dd, *J* = 13.6, 2.0 Hz, 1H), 3.83 (d, *J* = 9.6 Hz, 0.1H), 3.63 (s, 0.3H), 3.52 (d, *J* = 9.2 Hz, 1H), 3.33–3.31 (m, 4H), 3.16 (d, *J* = 9.6 Hz, 0.1H), 2.47 (s, 3H), 2.44 (s, 0.3H), 1.51 (s, 0.3H), 1.34 (s, 3H); <sup>13</sup>C NMR (101 MHz, CDCl<sub>3</sub>) δ 173.6, 173.4, 143.8, 143.75, 140.0, 139.3, 135.8, 135.6, 132.9, 132.8, 129.7, 128.5, 128.3, 128.26, 128.0, 127.8, 127.78, 127.5, 127.3, 124.7, 124.5, 60.4, 56.4, 54.1, 53.2, 52.6, 52.2, 51.4, 50.8, 29.6, 22.9, 21.5. HRMS (ESI): *m/z* calcd for C<sub>21</sub>H<sub>24</sub>NO<sub>4</sub>S [M+H]<sup>+</sup> 386.1421, found 386.1423.

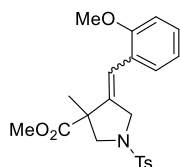

#### Methyl 4-(2-methoxybenzylidene)-3-methyl-1-tosylpyrrolidine-3-carboxylate (**4d**)

Prepared with protocol B. **4d** was obtained as a white solid after flash chromatography (PE/EA = 6/1) (0.2 mmol, 56%, *E/Z* = 1/0.12). mp 168–169 °C. <sup>1</sup>H NMR (400 MHz, CDCl<sub>3</sub>) δ 7.72 (d, *J* = 8.4 Hz, 2.24H), 7.36–7.31 (m, 2.24H), 7.23–7.19 (m, 1.12H), 7.04 (dd, *J* = 7.6, 1.2 Hz, 0.12H), 6.97 (dd, *J* = 7.6, 1.2 Hz, 1H), 6.85 (d, *J* = 8.0 Hz, 1H), 6.82–6.79 (m, 1.24H), 6.69 (t, *J* = 3.2 Hz, 0.12H), 6.47 (s, 1H), 4.19–4.09 (m, 2.24H), 3.81 (d, *J* = 9.6 Hz, 0.12H), 3.79 (s, 0.36H), 3.76 (s, 3H), 3.60 (d, *J* = 3.6 Hz, 1H), 3.57 (s, 0.36H), 3.33 (s, 3H), 3.25 (d, *J* = 9.6 Hz, 1H), 3.15 (d, *J* = 9.6 Hz, 0.12H), 2.45 (s, 3H), 2.42 (s, 0.36H), 1.25 (s, 0.36H), 1.23 (s, 3H); <sup>13</sup>C NMR (101 MHz, CDCl<sub>3</sub>) δ 173.6, 156.8, 143.7, 139.8, 133.3, 129.7, 129.65, 129.0, 127.7, 124.6, 120.8, 119.9, 110.1, 60.3, 55.3, 54.1, 52.1, 51.4, 21.5, 20.9. HRMS (ESI): *m/z* calcd for C<sub>22</sub>H<sub>26</sub>NO<sub>5</sub>S [M+H]<sup>+</sup> 416.1526, found 416.1531.

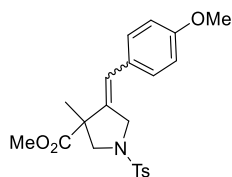

**Methyl 4-(4-methoxybenzylidene)-3-methyl-1-tosylpyrrolidine-3-carboxylate (4e)**

Prepared with protocol B. **4e** was obtained as a white solid after flash chromatography (PE/EA = 5/1) (0.2 mmol, 67%, *E/Z* = 1/0.18). mp 136–138 °C. <sup>1</sup>H NMR (400 MHz, CDCl<sub>3</sub>) δ 7.75–7.71 (m, 2.36H), 7.36–7.32 (m, 2.36H), 7.09 (d, *J* = 8.4 Hz, 0.36H), 6.98 (d, *J* = 8.4 Hz, 2H), 6.88 (d, *J* = 8.8 Hz, 0.36H), 6.81–6.77 (m, 2H), 6.39 (s, 1H), 6.35 (t, *J* = 2.4 Hz, 0.18H), 4.23 (dd, *J* = 14.0, 2.0 Hz, 0.18H), 4.15–4.09 (m, 1.18H), 3.99 (dd, *J* = 13.6, 2.0 Hz, 1H), 3.81–3.79 (m, 0.72H), 3.76 (s, 3H), 3.60 (s, 0.54H), 3.49 (d, *J* = 9.2 Hz, 1H), 3.35 (s, 3H), 3.29 (d, *J* = 9.6 Hz, 1H), 3.12 (d, *J* = 9.6 Hz, 0.18H), 2.44 (s, 3H), 2.42 (s, 0.54H), 1.47 (s, 0.54H), 1.33 (s, 3H); <sup>13</sup>C NMR (101 MHz, CDCl<sub>3</sub>) δ 173.7, 173.6, 158.9, 158.7, 143.8, 143.7, 138.5, 136.9, 132.9, 132.7, 129.7, 129.67, 129.6, 128.6, 128.0, 127.8, 127.75, 124.3, 123.8, 114.0, 113.4, 60.5, 56.4, 55.2, 55.1, 54.2, 53.1, 52.6, 52.3, 51.3, 50.8, 22.8, 21.5, 21.3. HRMS (ESI): *m/z* calcd for C<sub>22</sub>H<sub>26</sub>NO<sub>5</sub>S [M+H]<sup>+</sup> 416.1526, found 416.1529.

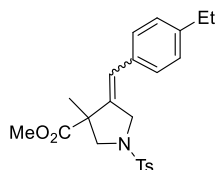

**Methyl 4-(4-ethylbenzylidene)-3-methyl-1-tosylpyrrolidine-3-carboxylate (4f)**

Prepared with protocol B. **4f** was obtained as a white solid after flash chromatography (PE/EA = 8/1) (0.2 mmol, 62%, *E/Z* = 47/4). mp 106–108 °C. <sup>1</sup>H NMR (400 MHz, CDCl<sub>3</sub>) δ 7.73 (d, *J* = 8.4 Hz, 2H), 7.35 (d, *J* = 8.0 Hz, 2H), 7.09 (d, *J* = 8.0 Hz, 2H), 6.96 (d, *J* = 8.0 Hz, 2H), 6.44 (s, 1H), 4.18–4.14 (m, 1H), 4.02–3.99 (m, 1H), 3.49 (d, *J* = 9.6 Hz, 1H), 3.32–3.30 (m, 4H), 2.60 (q, *J* = 15.2, 7.6 Hz, 2H), 2.45 (s, 3H), 1.33 (s, 3H), 1.19 (t, *J* = 7.6 Hz, 3H); <sup>13</sup>C NMR (101 MHz, CDCl<sub>3</sub>) δ 173.5, 143.8, 143.5, 139.3, 132.9, 132.85, 129.7, 128.3, 127.8, 127.5, 124.7, 60.5, 54.2, 52.2, 51.4, 28.5, 21.5, 21.48, 15.4. HRMS (ESI): *m/z* calcd for C<sub>23</sub>H<sub>28</sub>NO<sub>4</sub>S [M+H]<sup>+</sup> 414.1734, found 414.1739.

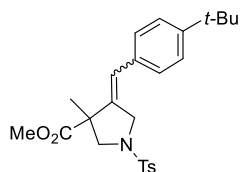

**Methyl 4-(4-(*tert*-butyl)benzylidene)-3-methyl-1-tosylpyrrolidine-3-carboxylate (4g)**

Prepared with protocol B. **4g** was obtained as a colorless oil after flash chromatography (PE/EA = 7/1) (0.2 mmol, 44%, *E/Z* = 7.7/1). <sup>1</sup>H NMR (400 MHz, CDCl<sub>3</sub>) δ 7.73 (d, *J* = 8.0 Hz, 2H), 7.36 (d, *J* = 8.0 Hz, 2H), 7.28 (d, *J* = 8.4 Hz, 2H), 6.98 (d, *J* = 8.0 Hz, 2H), 6.43 (s, 1H), 4.17 (dd, *J* = 13.6, 2.0 Hz, 1H), 4.00 (dd, *J* = 13.6, 2.0 Hz, 1H), 3.48 (d, *J* = 9.2 Hz, 1H), 3.32 (d, *J* = 9.6 Hz, 1H), 3.28 (s, 3H), 2.45 (s, 3H), 1.35 (s, 3H), 1.28 (s, 9H); <sup>13</sup>C NMR (101 MHz, CDCl<sub>3</sub>) δ 173.5, 150.4, 143.8, 139.4, 132.9, 132.6, 129.7, 128.0, 127.8, 124.9, 124.6, 60.5, 54.2, 52.2, 51.4, 34.5, 31.2, 21.6. HRMS (ESI): *m/z* calcd for C<sub>25</sub>H<sub>32</sub>NO<sub>4</sub>S [M+H]<sup>+</sup> 442.2047, found 442.2051.

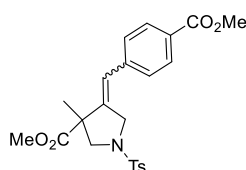

#### Methyl 4-(4-(methoxycarbonyl)benzylidene)-3-methyl-1-tosylpyrrolidine-3-carboxylate (**4h**)

Prepared with protocol B. **4h** was obtained as a white solid after flash chromatography (PE/EA = 5/1) (0.2 mmol, 66%, *E/Z* = 1/0.13). mp 130–131 °C. <sup>1</sup>H NMR (400 MHz, CDCl<sub>3</sub>) δ 7.94 (d, *J* = 8.4 Hz, 2H), 7.72 (d, *J* = 8.4 Hz, 2H), 7.36 (d, *J* = 8.0 Hz, 2H), 7.13 (d, *J* = 8.0 Hz, 2H), 6.48 (s, 1H), 4.17 (dd, *J* = 14.0, 2.0 Hz, 1H), 4.03 (dd, *J* = 14.0, 2.0 Hz, 1H), 3.89 (s, 3H), 3.51 (d, *J* = 9.2 Hz, 1H), 3.33 (s, 3H), 3.30 (d, *J* = 9.6 Hz, 1H), 2.45 (s, 3H), 1.31 (s, 3H); <sup>13</sup>C NMR (101 MHz, CDCl<sub>3</sub>) δ 173.1, 166.6, 144.0, 141.9, 140.3, 132.7, 129.8, 129.4, 129.0, 128.3, 127.8, 123.8, 60.4, 54.2, 52.4, 52.1, 51.6, 21.6, 21.5. HRMS (ESI): *m/z* calcd for C<sub>23</sub>H<sub>26</sub>NO<sub>6</sub>S [M+H]<sup>+</sup> 444.1475, found 444.1480.

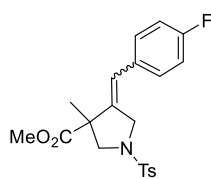

#### Methyl 4-(4-fluorobenzylidene)-3-methyl-1-tosylpyrrolidine-3-carboxylate (**4i**)

Prepared with protocol B. **4i** was obtained as a white solid after flash chromatography (PE/EA = 7/1) (0.2 mmol, 70%, *E/Z* = 56/5). mp 139–141 °C. <sup>1</sup>H NMR (400 MHz, CDCl<sub>3</sub>) δ 7.72 (d, *J* = 8.4 Hz, 2H), 7.35 (d, *J* = 8.0 Hz, 2H), 7.04–7.01 (m, 2H), 6.97–6.92 (m, 2H), 6.41 (s, 1H), 4.16–4.12 (m, 1H), 4.02–3.98 (m, 1H), 3.51 (d, *J* = 9.2 Hz, 1H), 3.34 (s, 3H), 3.28 (d, *J* = 9.2 Hz, 1H), 2.44 (s, 3H), 1.29 (s, 3H); <sup>13</sup>C NMR (101 MHz, CDCl<sub>3</sub>) δ 173.3, 161.9 (d, *J*<sub>C-F</sub> = 245.8 Hz), 143.9, 140.3, 132.7, 131.6, (d, *J*<sub>C-F</sub> = 3.5 Hz), 130.0 (d, *J*<sub>C-F</sub> = 8.0 Hz), 129.7, 127.8, 123.7, 115.0 (d, *J*<sub>C-F</sub> = 21.3 Hz), 60.4, 54.1, 52.3, 51.4, 21.5, 21.4; <sup>19</sup>F NMR (376 MHz, CDCl<sub>3</sub>) δ -114.2. HRMS (ESI): *m/z* calcd for C<sub>21</sub>H<sub>23</sub>FNO<sub>4</sub>S [M+H]<sup>+</sup> 404.1326, found 404.1330.



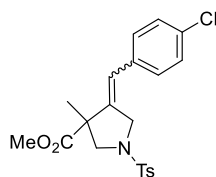

#### Methyl 4-(4-chlorobenzylidene)-3-methyl-1-tosylpyrrolidine-3-carboxylate (**4j**)

Prepared with protocol B. **4j** was obtained as a white solid after flash chromatography (PE/EA = 7/1) (0.2 mmol, 69%, *E/Z* = 43/15). mp 137–138 °C. <sup>1</sup>H NMR (400 MHz, CDCl<sub>3</sub>) δ 7.73–7.70 (m, 2H), 7.35 (d, *J* = 8.0 Hz, 2H), 7.25–7.21 (m, 2H), 6.99 (d, *J* = 8.4 Hz, 2H), 6.40 (s, 1H), 4.16–4.12 (m, 1H), 4.02–3.98 (m, 1H), 3.51 (d, *J* = 9.2 Hz, 1H), 3.35 (s, 3H), 3.28 (d, *J* = 9.2 Hz, 1H), 2.44 (s, 3H), 1.29 (s, 3H); <sup>13</sup>C NMR (101 MHz, CDCl<sub>3</sub>) δ 173.2, 143.9, 140.8, 134.0, 133.2, 132.7, 129.7, 129.65, 128.2, 127.8, 123.5, 60.4, 54.1, 52.3, 51.5, 21.5, 21.4. HRMS (ESI): *m/z* calcd for C<sub>21</sub>H<sub>23</sub>ClNO<sub>4</sub>S [M+H]<sup>+</sup> 420.1031, found 420.1034.

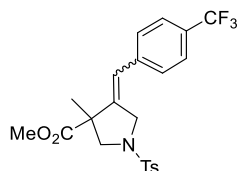

#### Methyl 3-methyl-1-tosyl-4-(4-(trifluoromethyl)benzylidene)pyrrolidine-3-carboxylate (**4k**)

Prepared with protocol B. **4k** was obtained as a white solid after flash chromatography (PE/EA = 7/1) (0.2 mmol, 71%, *E/Z* = 55/9). mp 126–127 °C. <sup>1</sup>H NMR (400 MHz, CDCl<sub>3</sub>) δ 7.72 (d, *J* = 8.4 Hz, 2H), 7.52 (d, *J* = 8.0 Hz, 2H), 7.36 (d, *J* = 8.0 Hz, 2H), 7.18 (d, *J* = 8.4 Hz, 2H), 6.48 (s, 1H), 4.19–4.15 (m, 1H), 4.05–4.01 (m, 1H), 3.53 (d, *J* = 9.6 Hz, 1H), 3.33 (s, 3H), 3.29 (d, *J* = 9.2 Hz, 1H), 2.45 (s, 3H), 1.29 (s, 3H); <sup>13</sup>C NMR (101 MHz, CDCl<sub>3</sub>) δ 173.1, 144.0, 142.1, 139.2, 132.7, 129.8, 129.4 (q, *J*<sub>C-F</sub> = 32.3 Hz), 128.7, 127.8, 125.0 (q, *J*<sub>C-F</sub> = 3.8 Hz), 123.9 (q, *J*<sub>C-F</sub> = 270.4 Hz), 123.4, 60.3, 54.1, 52.3, 51.6, 21.5, 21.48; <sup>19</sup>F NMR (376 MHz, CDCl<sub>3</sub>) δ -62.6. HRMS (ESI): *m/z* calcd for C<sub>22</sub>H<sub>23</sub>F<sub>3</sub>NO<sub>4</sub>S [M+H]<sup>+</sup> 454.1294, found 454.1302.

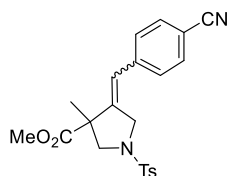

#### Methyl 4-(4-cyanobenzylidene)-3-methyl-1-tosylpyrrolidine-3-carboxylate (**4l**)

Prepared with protocol B. **4l** was obtained as a white solid after flash chromatography (PE/EA = 5/1) (0.2 mmol, 56%, *E/Z* = 40/6). mp 161–163 °C. <sup>1</sup>H NMR (400 MHz, CDCl<sub>3</sub>) δ 7.73–7.70 (m, 2H), 7.57–7.55 (m, 2H), 7.36 (d, *J* = 8.0 Hz, 2H), 7.18 (d, *J* = 8.0 Hz, 2H), 6.45 (s, 1H), 4.18–4.14 (m, 1H), 4.05–4.01 (m, 1H), 3.53 (d, *J* = 9.6 Hz,

1H), 3.36 (s, 3H), 3.28 (d,  $J = 9.6$  Hz, 1H), 2.45 (s, 3H), 1.29 (s, 3H);  $^{13}\text{C}$  NMR (101 MHz,  $\text{CDCl}_3$ )  $\delta$  173.0, 144.0, 143.0, 140.3, 132.6, 131.8, 129.8, 129.0, 127.8, 123.1, 118.5, 111.0, 60.3, 54.2, 52.4, 51.7, 21.5, 21.4. HRMS (ESI):  $m/z$  calcd for  $\text{C}_{22}\text{H}_{23}\text{N}_2\text{O}_4\text{S}$   $[\text{M}+\text{H}]^+$  411.1373, found 411.1378.

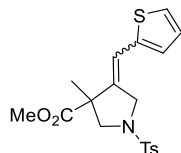

**Methyl 3-methyl-4-(thiophen-2-ylmethylene)-1-tosylpyrrolidine-3-carboxylate (4m)**

Prepared with protocol B. **4m** was obtained as a colorless oil after flash chromatography (PE/EA = 7/1) (0.2 mmol, 47%,  $E/Z = 1/0.26$ ).  $^1\text{H}$  NMR (400 MHz,  $\text{CDCl}_3$ )  $\delta$  7.76 (d,  $J = 8.0$  Hz, 0.52 H), 7.71 (d,  $J = 8.4$  Hz, 2H), 7.36–7.33 (m, 2.78H), 7.23 (dd,  $J = 4.8, 0.8$  Hz, 1H), 7.05–7.03 (m, 0.26H), 6.95–6.93 (m, 1.26H), 6.80 (d,  $J = 3.2$  Hz, 1H), 6.63 (t,  $J = 2.4$  Hz, 0.26 H), 6.46 (s, 1H), 4.25–4.21 (m, 0.26 H), 4.18–4.14 (m, 1H), 4.08–4.04 (m, 0.26 H), 3.94–3.90 (m, 1H), 3.83 (d,  $J = 9.6$  Hz, 0.26H), 3.64 (s, 0.78 H), 3.48 (s, 3H), 3.40–3.35 (m, 2H), 3.14 (d,  $J = 9.6$  Hz, 0.26 H), 2.45 (s, 3H), 2.43 (s, 0.78 H), 1.49 (s, 3H), 1.47 (s, 0.78H);  $^{13}\text{C}$  NMR (101 MHz,  $\text{CDCl}_3$ )  $\delta$  173.2, 144.0, 139.9, 137.6, 132.2, 129.8, 127.9, 127.4, 127.2, 126.0, 116.8, 60.7, 54.5, 52.5, 51.6, 21.5, 20.9. HRMS (ESI):  $m/z$  calcd for  $\text{C}_{19}\text{H}_{22}\text{NO}_4\text{S}_2$   $[\text{M}+\text{H}]^+$  392.0985, found 392.0988.

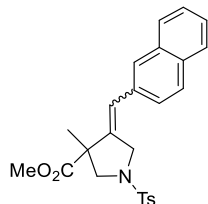

**Methyl 3-methyl-4-(naphthalen-2-ylmethylene)-1-tosylpyrrolidine-3-carboxylate (4n)**

Prepared with protocol B. **4n** was obtained as a colorless oil after flash chromatography (PE/EA = 7/1) (0.2 mmol, 53%,  $E/Z = 38/8$ ). mp 137–139 °C.  $^1\text{H}$  NMR (400 MHz,  $\text{CDCl}_3$ )  $\delta$  7.79–7.73 (m, 5H), 7.52 (s, 1H), 7.48–7.43 (m, 2H), 7.37 (d,  $J = 8.0$  Hz, 2H), 7.19 (dd,  $J = 8.4, 1.6$  Hz, 1H), 6.62 (s, 1H), 4.25–4.21 (m, 1H), 4.10–4.06 (m, 1H), 3.53 (d,  $J = 9.2$  Hz, 1H), 3.34 (d,  $J = 9.6$  Hz, 1H), 3.25 (s, 3H), 2.46 (s, 3H), 1.37 (s, 3H);  $^{13}\text{C}$  NMR (101 MHz,  $\text{CDCl}_3$ )  $\delta$  173.5, 143.9, 140.4, 133.1, 132.9, 132.8, 132.3, 129.8, 127.9, 127.8, 127.6, 127.5, 127.3, 126.3, 126.27, 126.2, 124.7, 60.5, 54.3, 52.2, 51.6, 21.6, 21.5. HRMS (ESI):  $m/z$  calcd for  $\text{C}_{25}\text{H}_{26}\text{NO}_4\text{S}$   $[\text{M}+\text{H}]^+$  436.1577, found 436.1581.

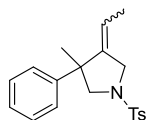

#### 4-Ethylidene-3-methyl-3-phenyl-1-tosylpyrrolidine (4o)

Prepared with protocol B. **4o** was obtained as a colorless oil after flash chromatography (PE/EA = 10/1) (0.2 mmol, 90%, *E/Z* = 1/0.68). <sup>1</sup>H NMR (400 MHz, CDCl<sub>3</sub>) δ 7.59–7.55 (m, 3.36H), 7.24–7.10 (m, 11.76H), 5.31 (dd, *J* = 14.4, 7.2 Hz, 1H), 5.18–5.13 (m, 0.68H), 4.00 (d, *J* = 12.8 Hz, 1H), 3.90 (d, *J* = 14.0 Hz, 0.68H), 3.79 (d, *J* = 14.0 Hz, 0.68H), 3.67 (d, *J* = 12.8 Hz, 1H), 3.62 (d, *J* = 9.2 Hz, 0.68H), 3.29 (d, *J* = 9.2 Hz, 1H), 3.09 (d, *J* = 9.2 Hz, 0.68H), 3.00 (d, *J* = 9.2 Hz, 1H), 2.35 (s, 3H), 2.34 (s, 2.04H), 1.54 (s, 3H), 1.52 (dd, *J* = 6.8, 1.2 Hz, 2.04H), 1.34 (s, 2.04H), 1.08 (d, *J* = 7.2 Hz, 3H); <sup>13</sup>C NMR (101 MHz, CDCl<sub>3</sub>) δ 145.0, 144.6, 143.6, 143.4, 143.2, 142.8, 133.0, 131.9, 129.6, 128.4, 128.2, 128.0, 127.6, 126.4, 126.3, 118.5, 118.3, 65.1, 61.5, 54.3, 49.8, 49.7, 48.7, 25.6, 23.8, 21.5, 21.48, 14.4, 13.9. HRMS (ESI): *m/z* calcd for C<sub>20</sub>H<sub>24</sub>NO<sub>2</sub>S [M+H]<sup>+</sup> 342.1522, found 342.1523.

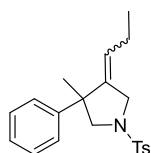

#### 3-Methyl-3-phenyl-4-propylidene-1-tosylpyrrolidine (4p)

Prepared with protocol B. **4p** was obtained as a colorless oil after flash chromatography (PE/EA = 10/1) (0.2 mmol, 89%, *E/Z* = 1/0.54). <sup>1</sup>H NMR (400 MHz, CDCl<sub>3</sub>) δ 7.67–7.62 (m, 3.08H), 7.31 (d, *J* = 7.6 Hz, 2H), 7.27–7.23 (m, 7.24H), 7.21–7.16 (m, 1.54H), 5.28–5.23 (m, 1H), 5.19–5.15 (m, 0.54H), 4.08 (dd, *J* = 12.8, 1.2 Hz, 1H), 4.00–3.96 (m, 0.54H), 3.88–3.83 (m, 0.54H), 3.78–3.73 (m, 1H), 3.69 (d, *J* = 9.2 Hz, 0.54H), 3.35 (d, *J* = 9.2 Hz, 1H), 3.17 (d, *J* = 9.6 Hz, 0.54H), 3.07 (d, *J* = 9.2 Hz, 1H), 2.43 (s, 3H), 2.41 (s, 1.62H), 2.00–1.93 (m, 1H), 1.61–1.51 (m, 4.08H), 1.50–1.44 (m, 1H), 1.42 (s, 1.62H), 0.94 (t, *J* = 7.6 Hz, 1.62H), 0.66 (t, *J* = 7.2 Hz, 3H); <sup>13</sup>C NMR (101 MHz, CDCl<sub>3</sub>) δ 145.0, 145.0, 143.6, 143.4, 141.6, 141.5, 133.1, 131.9, 129.6, 129.5, 128.3, 128.2, 128.0, 127.6, 126.4, 126.0, 125.8, 65.1, 61.4, 54.3, 49.7, 49.5, 48.9, 25.7, 24.4, 22.5, 21.6, 21.5, 21.47, 13.6, 13.3. HRMS (ESI): *m/z* calcd for C<sub>21</sub>H<sub>26</sub>NO<sub>2</sub>S [M+H]<sup>+</sup> 356.1679, found 356.1681.

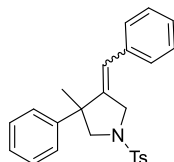

#### 4-Benzylidene-3-methyl-3-phenyl-1-tosylpyrrolidine (4q)

Prepared with protocol B. **4q** was obtained as a white solid after flash chromatography (PE/EA = 10/1) (0.2 mmol, 72%, *E/Z* = 1/0.73). mp 139–141 °C. <sup>1</sup>H NMR (400 MHz, CDCl<sub>3</sub>) δ 7.59–7.56 (m, 3.46H), 7.30–7.07 (m, 16.3H), 6.96–6.91

(m, 2.73H), 6.72–6.70 (m, 1.73H), 6.45 (s, 1H), 6.11 (t,  $J = 2.4$  Hz, 0.73H), 4.22 (dd,  $J = 14.8, 2.4$  Hz, 0.73H), 4.16 (dd,  $J = 14.8, 2.4$  Hz, 0.73H), 4.10 (d,  $J = 2.0$  Hz, 2H), 3.65 (d,  $J = 9.6$  Hz, 0.73H), 3.34 (d,  $J = 9.2$  Hz, 1H), 3.21 (d,  $J = 9.2$  Hz, 1H), 3.16 (d,  $J = 9.6$  Hz, 0.73H), 2.36 (s, 3H), 2.33 (s, 2.19H), 1.49 (s, 2.19H), 1.39 (s, 3H);  $^{13}\text{C}$  NMR (101 MHz,  $\text{CDCl}_3$ )  $\delta$  144.7, 144.6, 144.4, 143.7, 143.6, 143.5, 136.2, 135.5, 133.1, 132.5, 129.7, 129.6, 128.8, 128.6, 128.4, 128.39, 128.3, 127.8, 127.6, 127.5, 127.2, 126.7, 126.6, 126.5, 126.4, 124.4, 124.1, 65.4, 60.3, 55.5, 51.4, 50.9, 49.6, 25.7, 23.2, 21.54, 21.5. HRMS (ESI):  $m/z$  calcd for  $\text{C}_{25}\text{H}_{26}\text{NO}_2\text{S}$   $[\text{M}+\text{H}]^+$  404.1679, found 404.1680.

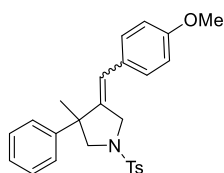

#### 4-(4-Methoxybenzylidene)-3-methyl-3-phenyl-1-tosylpyrrolidine (4r)

Prepared with protocol B. **4r** was obtained as a white solid after flash chromatography (PE/EA = 10/1) (0.2 mmol, 72%,  $E/Z = 1/0.23$ ). mp 133–134 °C.  $^1\text{H}$  NMR (400 MHz,  $\text{CDCl}_3$ )  $\delta$  7.67–7.64 (m, 2.46H), 7.31–7.17 (m, 8.61H), 7.10 (d,  $J = 8.8$  Hz, 0.46H), 6.90 (d,  $J = 8.8$  Hz, 0.46H), 6.74 (d,  $J = 8.8$  Hz, 2H), 6.56 (d,  $J = 8.8$  Hz, 2H), 6.47 (s, 1H), 6.14 (s, 0.23H), 4.30–4.21 (m, 0.46H), 4.16 (d,  $J = 1.6$  Hz, 2H), 3.82 (s, 0.69H), 3.74 (d,  $J = 9.2$  Hz, 0.23H), 3.68 (s, 3H), 3.40 (d,  $J = 9.6$  Hz, 1H), 3.29 (d,  $J = 9.6$  Hz, 1H), 3.22 (d,  $J = 9.6$  Hz, 0.23H), 2.43 (s, 3H), 2.41 (s, 0.69H), 1.56 (s, 0.69H), 1.49 (s, 3H);  $^{13}\text{C}$  NMR (101 MHz,  $\text{CDCl}_3$ )  $\delta$  158.7, 158.3, 144.8, 143.5, 143.46, 141.9, 141.7, 133.1, 132.4, 130.1, 129.6, 129.56, 129.54, 129.0, 128.4, 128.36, 128.0, 127.8, 127.5, 126.6, 126.5, 126.48, 126.3, 123.9, 123.4, 114.0, 113.0, 65.4, 60.3, 55.6, 55.3, 55.0, 51.2, 50.9, 49.5, 25.6, 23.0, 21.5, 21.45. HRMS (ESI):  $m/z$  calcd for  $\text{C}_{26}\text{H}_{28}\text{NO}_3\text{S}$   $[\text{M}+\text{H}]^+$  434.1784, found 434.1788.

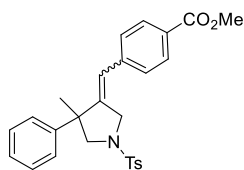

#### Methyl 4-((4-methyl-4-phenyl-1-tosylpyrrolidin-3-ylidene)methyl)benzoate (4s)

Prepared with protocol B. **4s** was obtained as a white solid after flash chromatography (PE/EA = 6/1) (0.2 mmol, 60%,  $E/Z = 1/0.18$ ). mp 124–125 °C.  $^1\text{H}$  NMR (400 MHz,  $\text{CDCl}_3$ )  $\delta$  8.09 (d,  $J = 8.4$  Hz, 0.36H), 7.76–7.73 (m, 4.36H), 7.40–7.34 (m, 4.36H), 7.29–7.23 (m, 4.26H), 6.90 (d,  $J = 8.0$  Hz, 2H), 6.60 (s, 1H), 6.29 (t,  $J = 2.8$  Hz, 0.18H), 4.36–4.23 (m, 2.36H), 4.01 (s, 0.54H), 3.92 (s, 3H), 3.81 (d,  $J = 9.2$  Hz, 0.18H), 3.46 (d,  $J = 9.6$  Hz, 1H), 3.39 (d,  $J = 9.6$  Hz, 1H), 3.34 (d,  $J = 9.2$  Hz, 0.18H), 2.53 (s, 3H), 2.49 (s, 0.54H), 1.67 (s, 0.54H), 1.57 (s, 3H).  $^{13}\text{C}$  NMR (101 MHz,

CDCl<sub>3</sub>)  $\delta$  166.7, 146.4, 144.2, 143.7, 140.2, 132.4, 129.7, 128.8, 128.7, 128.5, 128.2, 127.9, 126.8, 126.3, 123.3, 65.3, 55.6, 52.0, 49.7, 23.2, 21.6. HRMS (ESI):  $m/z$  calcd for C<sub>27</sub>H<sub>28</sub>NO<sub>4</sub>S [M+H]<sup>+</sup> 462.1734, found 462.1738.

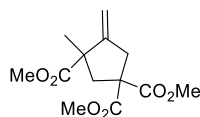

#### Trimethyl 3-methyl-4-methylenecyclopentane-1,1,3-tricarboxylate (4t)

Prepared with protocol B. **4t** was obtained as a colorless oil after flash chromatography (PE/EA = 10/1) (0.2 mmol, 79%). <sup>1</sup>H NMR (400 MHz, CDCl<sub>3</sub>)  $\delta$  5.07 (t,  $J$  = 2.0 Hz, 1H), 5.01 (t,  $J$  = 2.0 Hz, 1H), 3.73 (s, 3H), 3.71 (s, 3H), 3.63 (s, 3H), 3.21 (dt,  $J$  = 16.4, 2.4 Hz, 1H), 3.03 (d,  $J$  = 14.0 Hz, 1H), 2.91 (d,  $J$  = 16.4 Hz, 1H), 2.37 (d,  $J$  = 14.0 Hz, 1H), 1.36 (s, 3H); <sup>13</sup>C NMR (101 MHz, CDCl<sub>3</sub>)  $\delta$  175.5, 172.1, 171.6, 151.7, 109.2, 57.9, 52.9, 52.85, 52.4, 51.8, 44.6, 41.1, 24.7. HRMS (ESI):  $m/z$  calcd for C<sub>13</sub>H<sub>19</sub>O<sub>6</sub> [M+H]<sup>+</sup> 271.1176, found 271.1172.

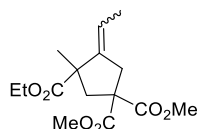

#### 3-Ethyl 1,1-dimethyl 4-ethylidene-3-methylcyclopentane-1,1,3-tricarboxylate (4u)

Prepared with protocol B. **4u** was obtained as a colorless oil after flash chromatography (PE/EA = 10/1) (0.2 mmol, 82%,  $E/Z$  = 1/0.73). <sup>1</sup>H NMR (400 MHz, CDCl<sub>3</sub>)  $\delta$  5.47–5.41 (m, 1.73H), 4.18–4.03 (m, 3.46H), 3.72–3.71 (m, 10.38H), 3.10–2.89 (m, 5.19H), 2.41 (d,  $J$  = 14 Hz, 1H), 2.31 (d,  $J$  = 14.0 Hz, 0.73H), 1.62 (d,  $J$  = 6.8 Hz, 2.19H), 1.52 (d,  $J$  = 7.2 Hz, 3H), 1.35 (s, 3H), 1.30 (s, 2.19H), 1.23–1.17 (m, 5.19H); <sup>13</sup>C NMR (101 MHz, CDCl<sub>3</sub>)  $\delta$  175.8, 175.4, 172.4, 172.0, 171.8, 171.3, 142.8, 142.6, 119.5, 118.9, 60.9, 58.6, 58.1, 52.8, 52.7, 52.69, 51.9, 50.0, 47.5, 44.5, 42.6, 37.0, 24.9, 23.4, 14.7, 14.1, 14.0, 13.8. HRMS (ESI):  $m/z$  calcd for C<sub>15</sub>H<sub>23</sub>O<sub>6</sub> [M+H]<sup>+</sup> 299.1489, found 299.1490.

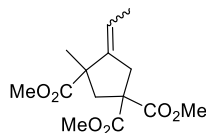

#### Trimethyl 4-ethylidene-3-methylcyclopentane-1,1,3-tricarboxylate (4v)

Prepared with protocol B. **4v** was obtained as a colorless oil after flash chromatography (PE/EA = 10/1) (0.2 mmol, 85%,  $E/Z$  = 1/0.72). <sup>1</sup>H NMR (400 MHz, CDCl<sub>3</sub>)  $\delta$  5.46–5.40 (m, 1.72H), 3.72–3.71 (m, 10.32H), 3.65 (s, 3H), 3.60 (s, 2.16H), 3.11–2.87 (m, 5.16H), 2.42 (dd,  $J$  = 13.6, 0.4 Hz, 1H), 2.31 (d,  $J$  = 14.0 Hz, 0.72H), 1.62 (dt,  $J$  = 6.8, 1.6 Hz, 2.16H), 1.51 (dt,  $J$  = 7.2, 2.0 Hz, 3H), 1.36 (s, 3H), 1.31 (s, 2.16H); <sup>13</sup>C NMR (101 MHz, CDCl<sub>3</sub>)  $\delta$  176.3, 175.9, 172.3, 171.9, 171.8, 171.3, 142.7, 142.5, 119.6, 119.1, 58.6, 58.1, 52.8, 52.76, 52.7, 52.2, 52.1, 51.9, 49.9, 47.5,

44.6, 42.5, 36.9, 24.9, 23.4, 14.7, 13.6. HRMS (ESI):  $m/z$  calcd for  $C_{14}H_{21}O_6$   $[M+H]^+$  285.1333, found 285.1335.

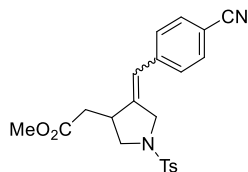

### Methyl 2-(4-(4-cyanobenzylidene)-1-tosylpyrrolidin-3-yl)acetate (**4w**)

Prepared with protocol B. **4w** was obtained as a white solid after flash chromatography (PE/EA = 3/1) (0.2 mmol, 60%,  $E/Z$  = 27/16). mp 157–158 °C.  $^1H$  NMR (400 MHz,  $CDCl_3$ )  $\delta$  7.73–7.70 (m, 2H), 7.64–7.61 (m, 2H), 7.34–7.32 (m, 2H), 7.22–7.19 (m, 2H), 6.32–6.30 (m, 1H), 4.18–4.13 (m, 1H), 4.02 (dd,  $J$  = 2.4 Hz,  $J$  = 15.2 Hz, 1H), 3.69 (s, 3H), 3.48–3.44 (m, 1H), 3.29–3.23 (m, 1H), 3.14–3.10 (m, 1H), 2.65–2.60 (m, 1H), 2.53–2.47 (m, 1H), 2.42 (s, 3H);  $^{13}C$  NMR (101 MHz,  $CDCl_3$ )  $\delta$  171.6, 144.0, 143.3, 140.5, 132.5, 132.4, 129.9, 128.6, 127.8, 122.3, 118.6, 110.7, 51.9, 50.5, 41.2, 37.6, 21.5. HRMS (ESI):  $m/z$  calcd for  $C_{22}H_{23}N_2O_4S$   $[M+H]^+$  411.1373, found 411.1370.

## 8. References

- (1) S. Žukauskaitė, G. Mangelinckx, C. Callebaut, A. Wybon, Šačkus and N. De Kimpe, Synthesis of 1,5-Diazaspiro[2.3]Hexanes, a Novel Diazaspirocyclic System, *Tetrahedron*, 2013, **69**, 3437–3443.
- (2) K. H. Kim, J. W. Lim, J. Lee, M. J. Go and J. N. Kim, Thermal Intramolecular [2+2] Cycloaddition: Synthesis of 3-Azabicyclo[3.1.1]Heptanes from Morita-Baylis-Hillman Adduct-Derived 4,4-Diaryl-1,3-Dienes, *Adv. Synth. Catal.*, 2014, **356**, 3363–3369.
- (3) Y. X. Tan, S. Li, L. Song, X. Zhang, Y. D. Wu and J. Sun, Ruthenium-Catalyzed Geminal Hydroborative Cyclization of Enynes, *Angew. Chem., Int. Ed.*, 2022, **61**, e202204319.
- (4) S. Gao, C. Wang, J. Yang and J. Zhang, Cobalt-Catalyzed Enantioselective Intramolecular Reductive Cyclization via Electrochemistry, *Nat. Commun.*, 2023, **14**, 1301.
- (5) P.-T. Li, R. Yang, Y.-P. Ma, J.-L. Zhao, S.-N. Liu, Z.-D. Qiu, Y.-T. Ding, Z.-F. Shi, Y. Miao, M. Zhao and X.-P. Cao, Anthracene-Triphenylamine Materials with High Luminance and Negligible Efficiency Roll-off for Organic Light-Emitting Diodes, *Dyes Pigm.*, 2024, **224**, 112041.
- (6) Z.-P. Wu, G.-J. Liu, C.-C. Zhu, Z.-M. Li, X.-C. Gao and Q.-Y. Cao, Violet-Blue- or Pure-Blue-Emitting Triphenylamine Derivatives: Synthesis and Properties, *Can. J. Chem.*, 2013, **91**, 1043–1047.

- (7) J. Xu, J. Cao, X. Wu, H. Wang, X. Yang, X. Tang, R. W. Toh, R. Zhou, E. K. L. Yeow and J. Wu, Unveiling Extreme Photoreduction Potentials of Donor–Acceptor Cyanoarenes to Access Aryl Radicals from Aryl Chlorides, *J. Am. Chem. Soc.*, 2021, **143**, 13266–13273.
- (8) D. Nicewicz, H. Roth and N. Romero, Experimental and Calculated Electrochemical Potentials of Common Organic Molecules for Applications to Single-Electron Redox Chemistry, *Synlett*, 2015, **27**, 714–723.
- (9) A. Suzuki, Y. Kamei, M. Yamashita, Y. Seino, Y. Yamaguchi, T. Yoshino, M. Kojima and S. Matsunaga, Photocatalytic Deuterium Atom Transfer Deuteration of Electron-Deficient Alkenes with High Functional Group Tolerance, *Angew. Chem., Int. Ed.*, 2022, **62**, e202214433.

## 9. Copies of $^1\text{H}$ NMR and $^{13}\text{C}$ NMR spectra

(1a)

$^1\text{H}$  NMR ( $\text{CDCl}_3$ , 400 MHz)

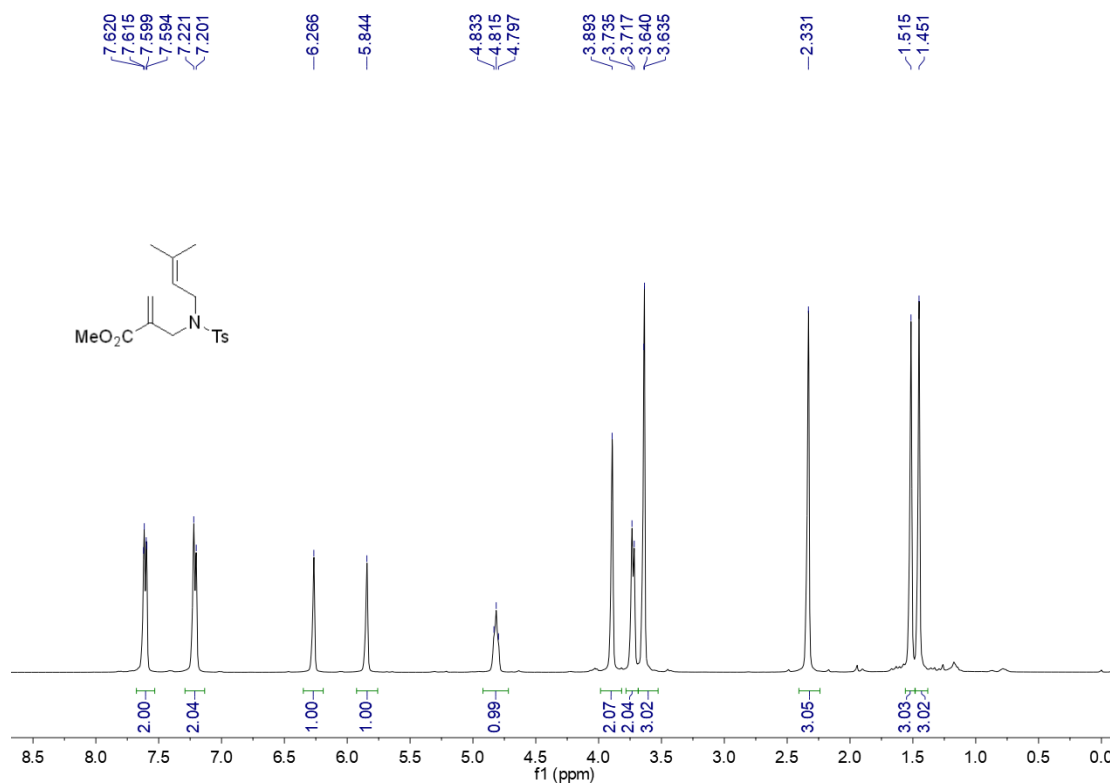

$^{13}\text{C}$  NMR ( $\text{CDCl}_3$ , 101 MHz)

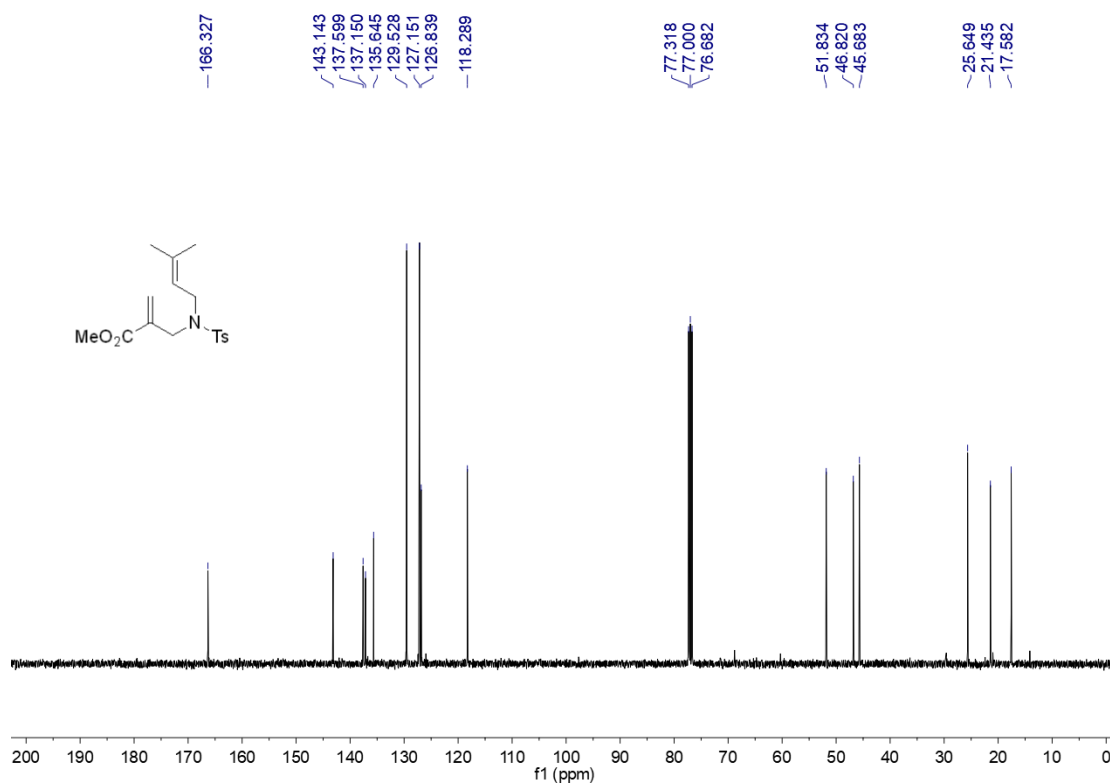



(1b)  
<sup>1</sup>H NMR (CDCl<sub>3</sub>, 400 MHz)

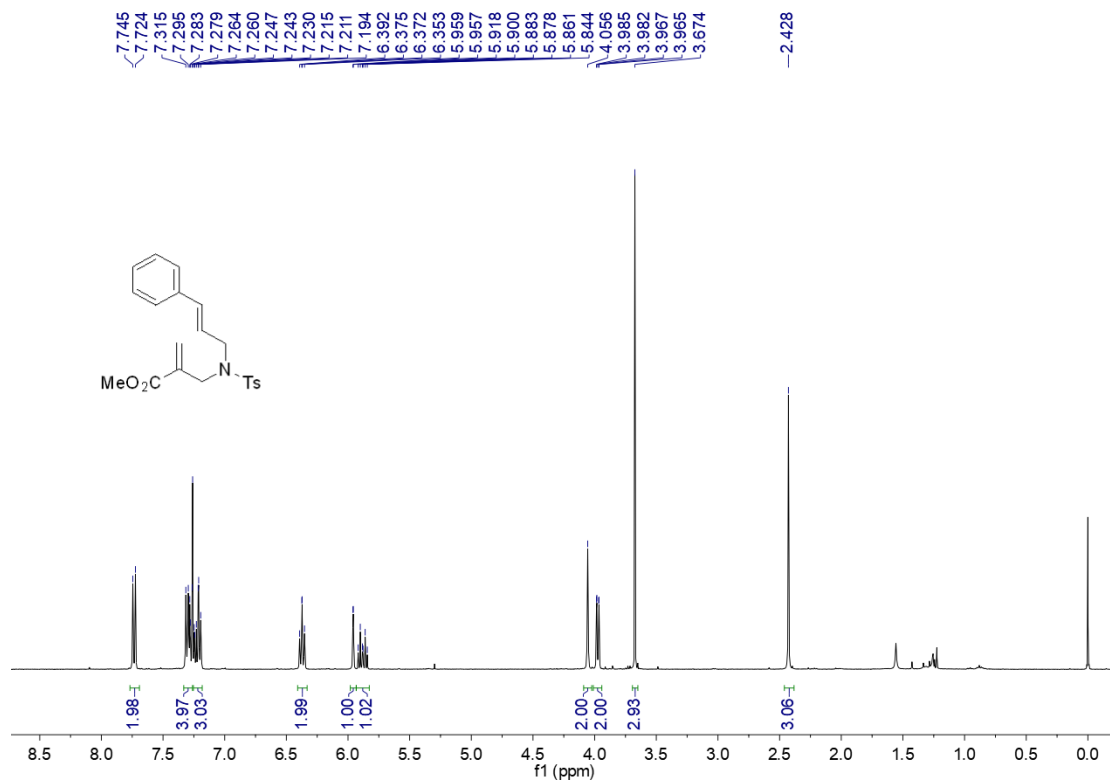

<sup>13</sup>C NMR (CDCl<sub>3</sub>, 101 MHz)

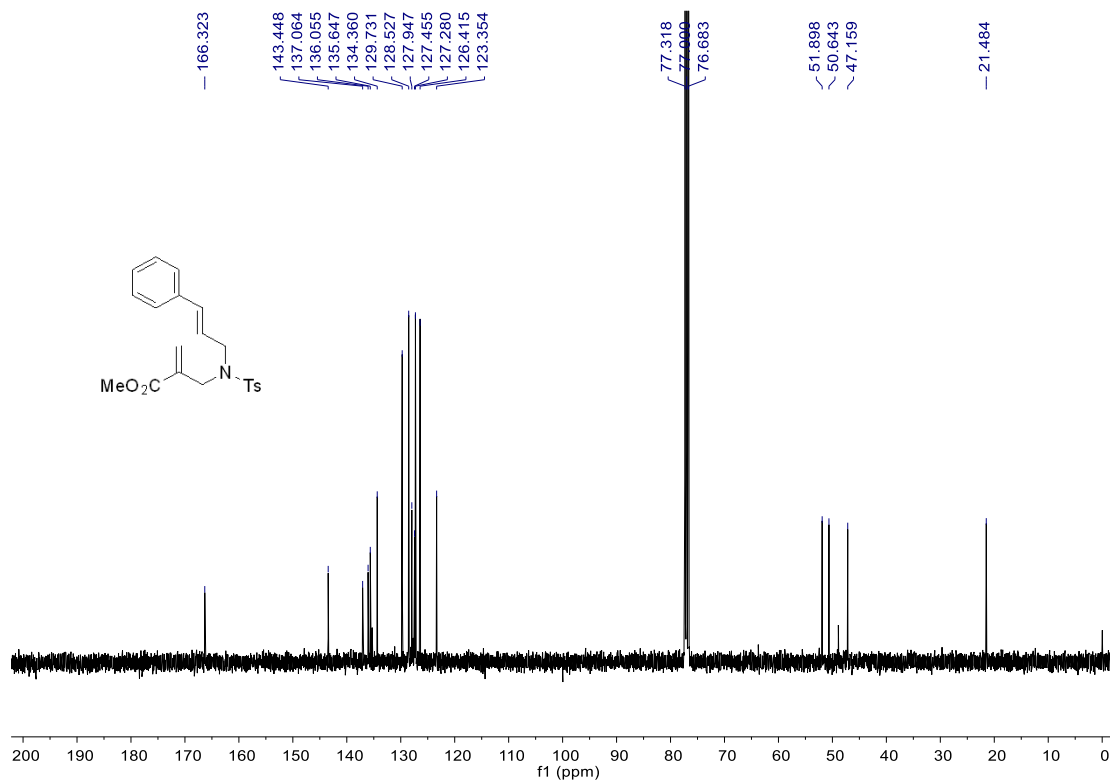

**(1c)**  
<sup>1</sup>H NMR (CDCl<sub>3</sub>, 400 MHz)

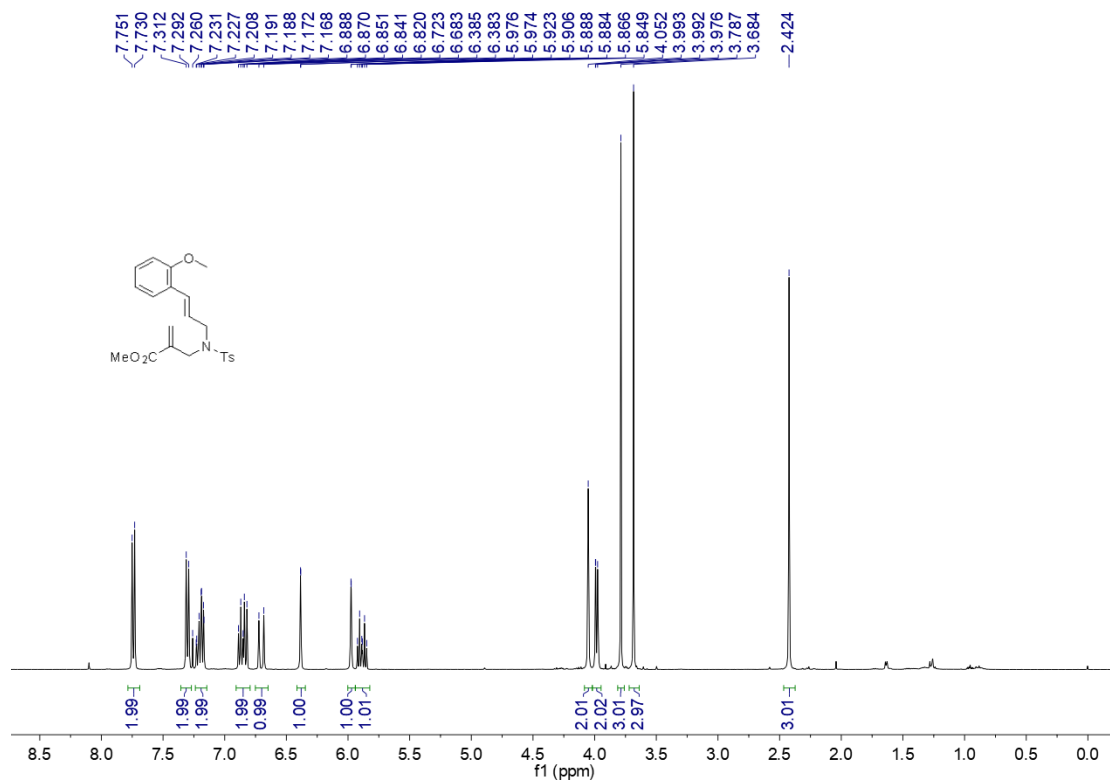

<sup>13</sup>C NMR (CDCl<sub>3</sub>, 101 MHz)

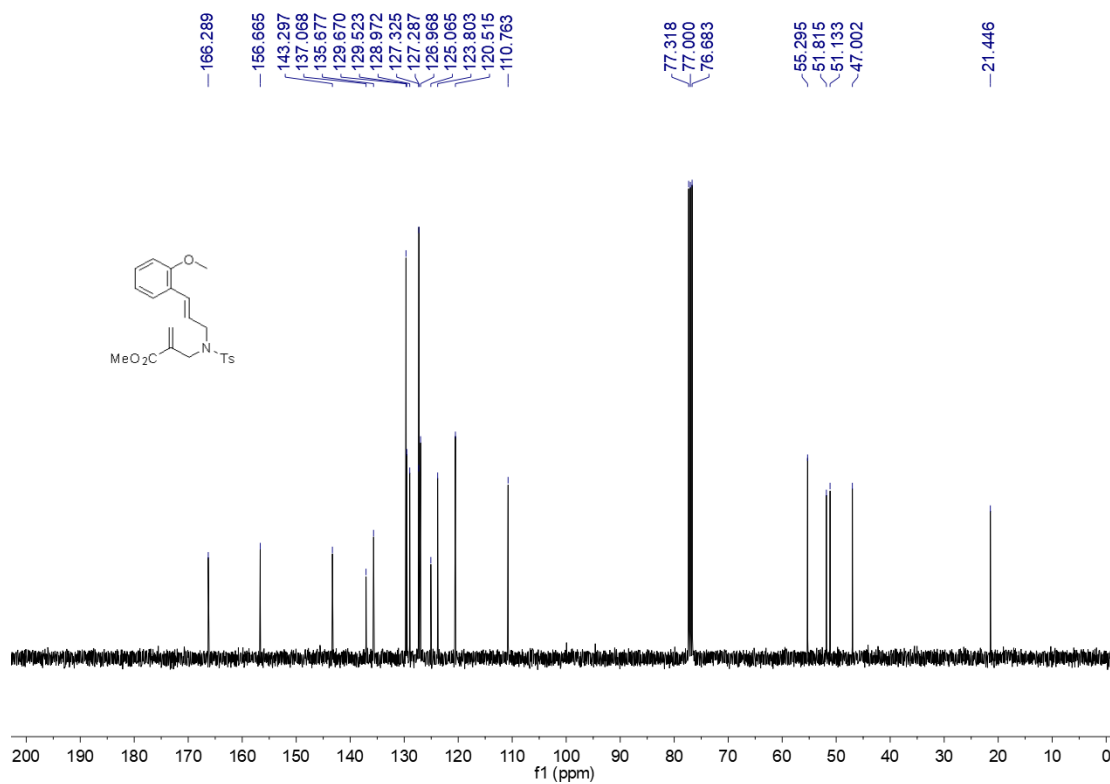

**(1d)**  
**<sup>1</sup>H NMR (CDCl<sub>3</sub>, 400 MHz)**

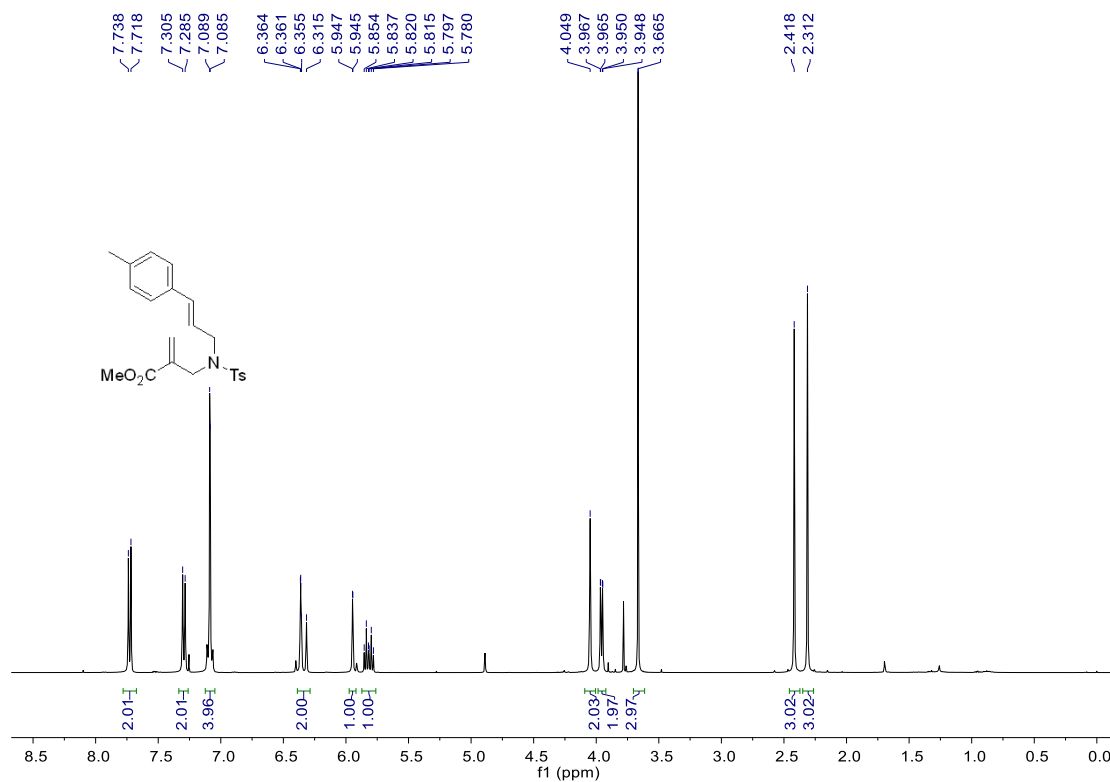

**<sup>13</sup>C NMR (CDCl<sub>3</sub>, 101 MHz)**

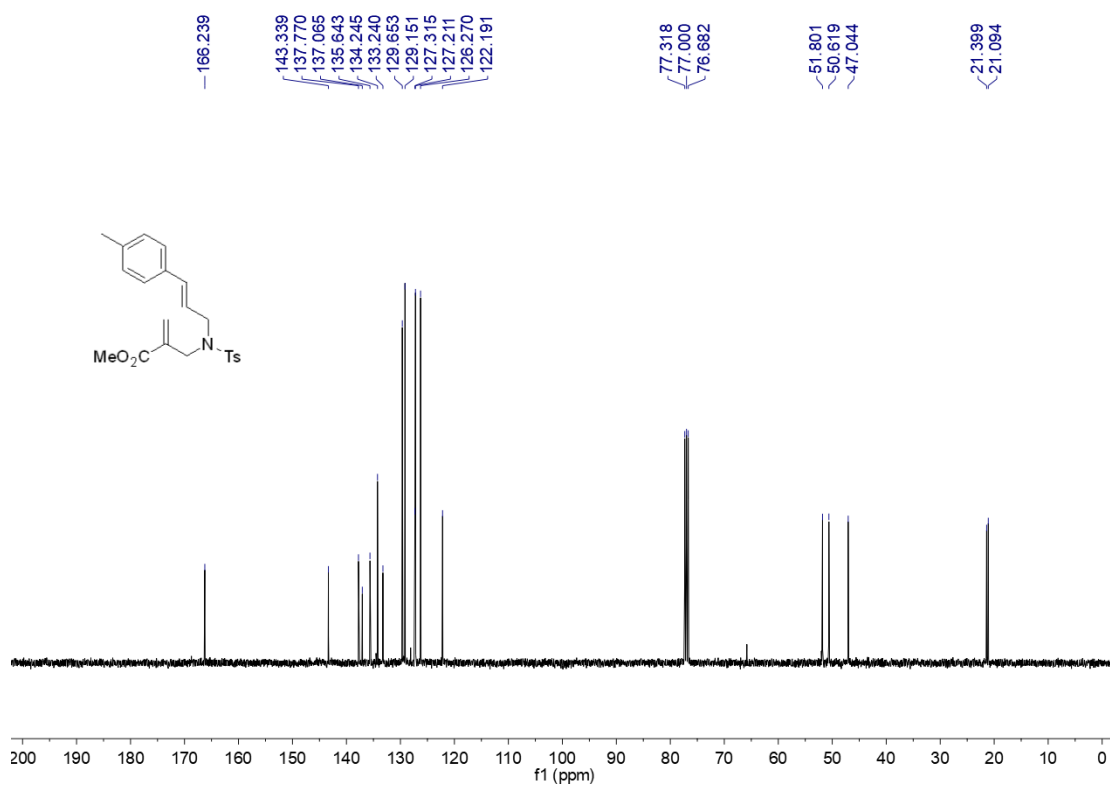

(1f)  
<sup>1</sup>H NMR (CDCl<sub>3</sub>, 400 MHz)

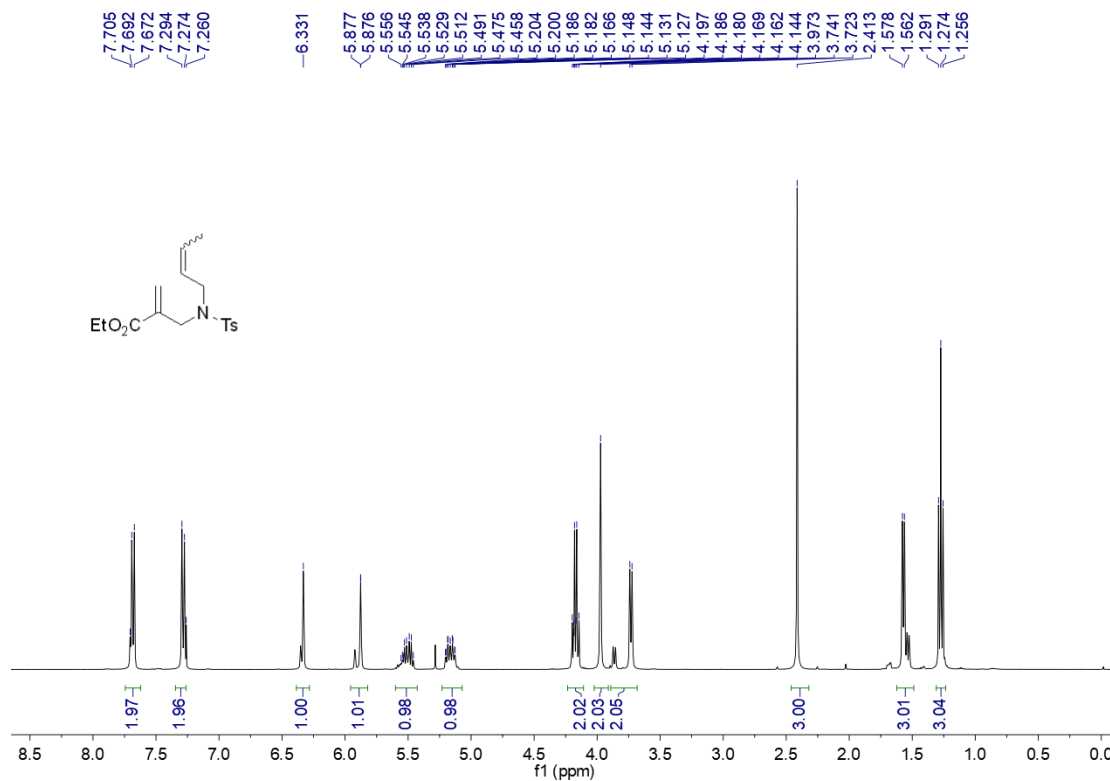

<sup>13</sup>C NMR (CDCl<sub>3</sub>, 101 MHz)

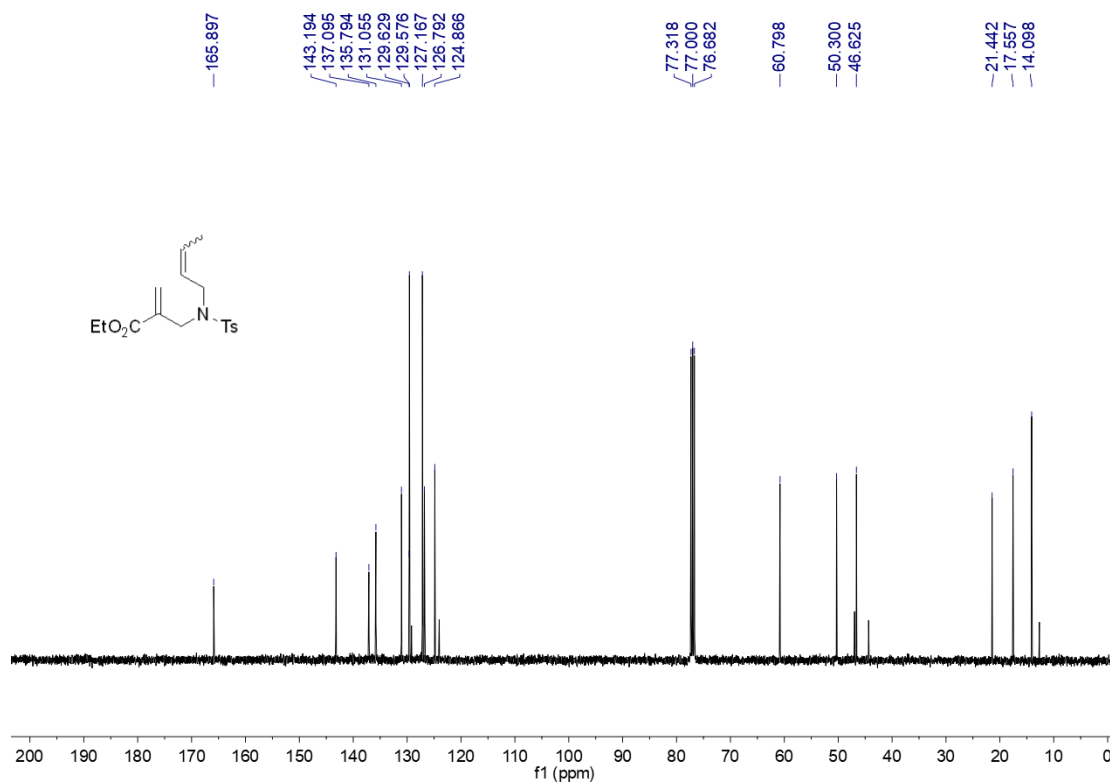

**(1g)**  
**<sup>1</sup>H NMR (CDCl<sub>3</sub>, 400 MHz)**

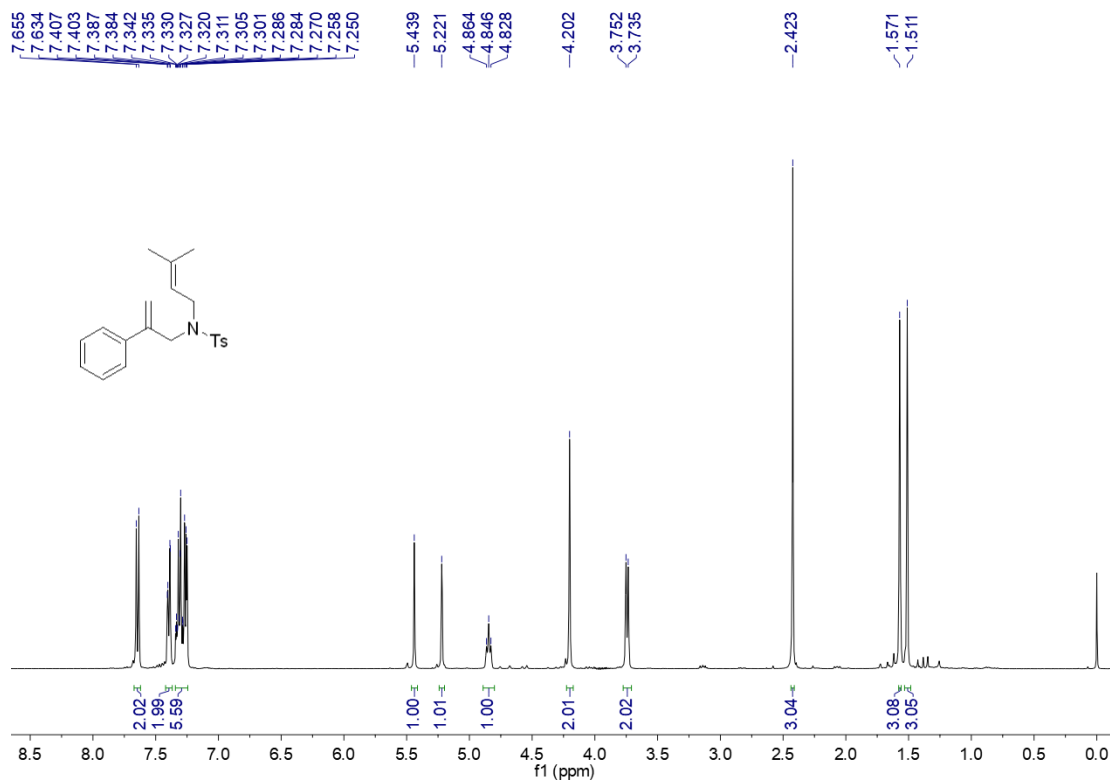

**<sup>13</sup>C NMR (CDCl<sub>3</sub>, 101 MHz)**

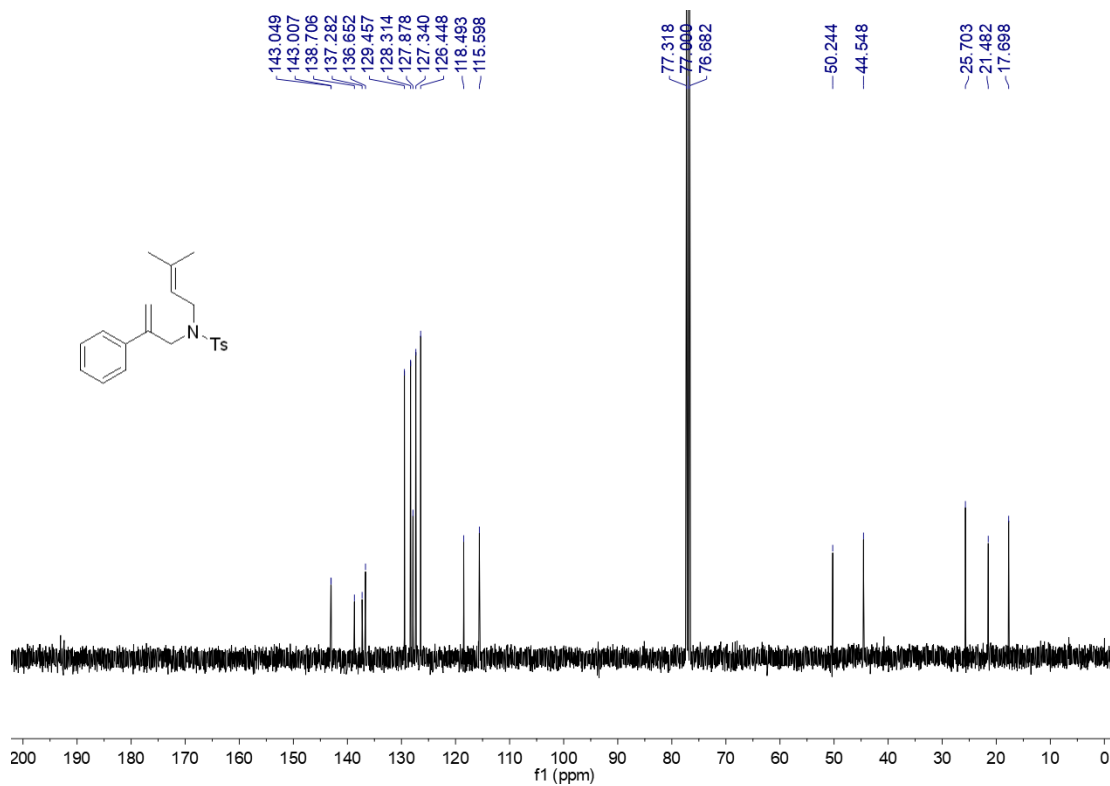

**(1h)**  
**<sup>1</sup>H NMR (CDCl<sub>3</sub>, 400 MHz)**

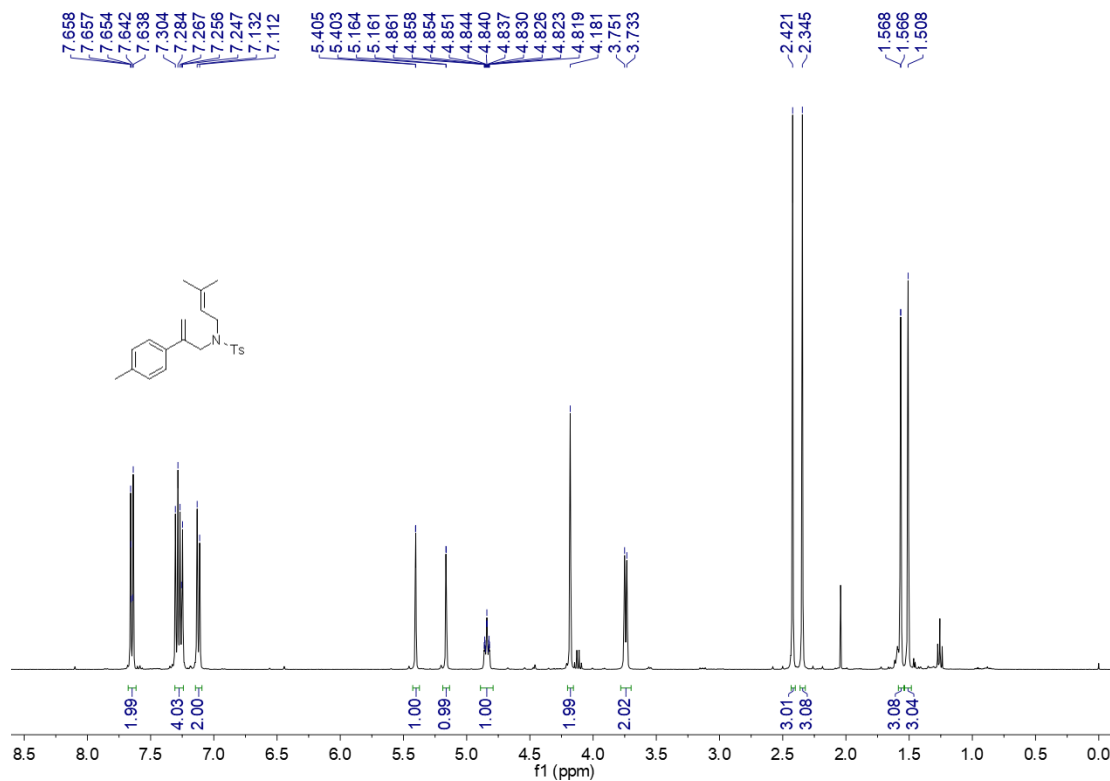

**<sup>13</sup>C NMR (CDCl<sub>3</sub>, 101 MHz)**

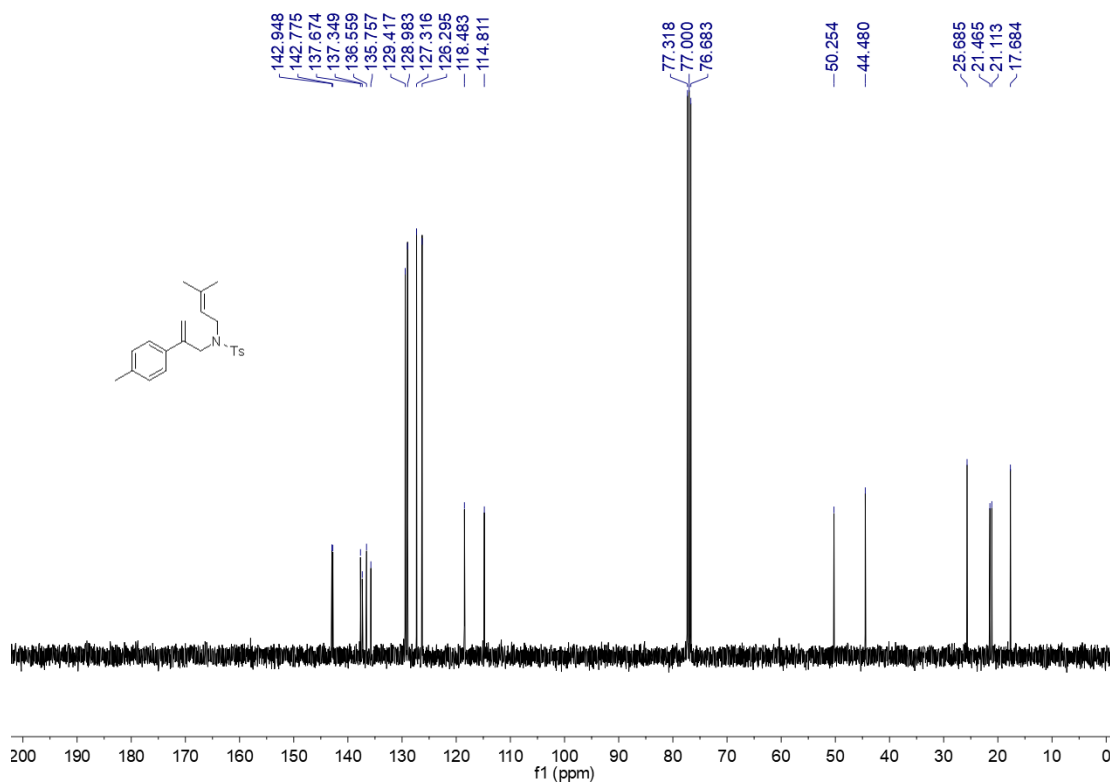

**(1i)**  
**<sup>1</sup>H NMR (CDCl<sub>3</sub>, 400 MHz)**

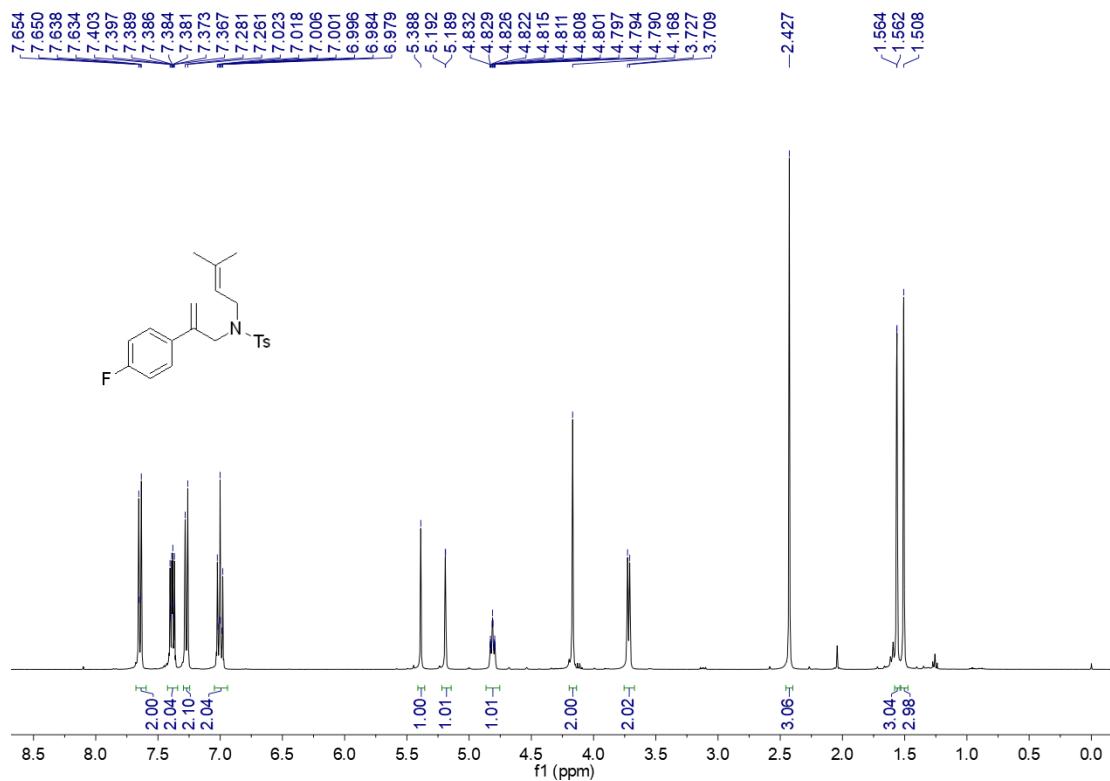

**<sup>13</sup>C NMR (CDCl<sub>3</sub>, 101 MHz)**

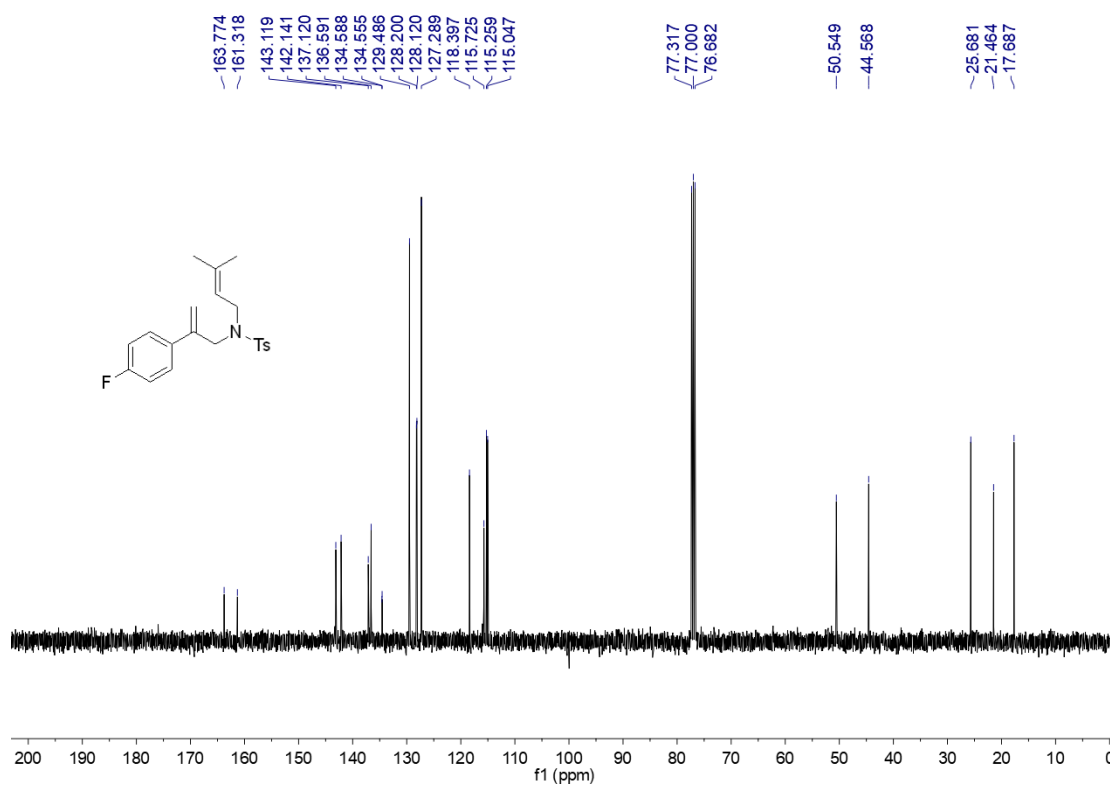

**$^{19}\text{F}$  NMR (CDCl<sub>3</sub>, 376 MHz)**

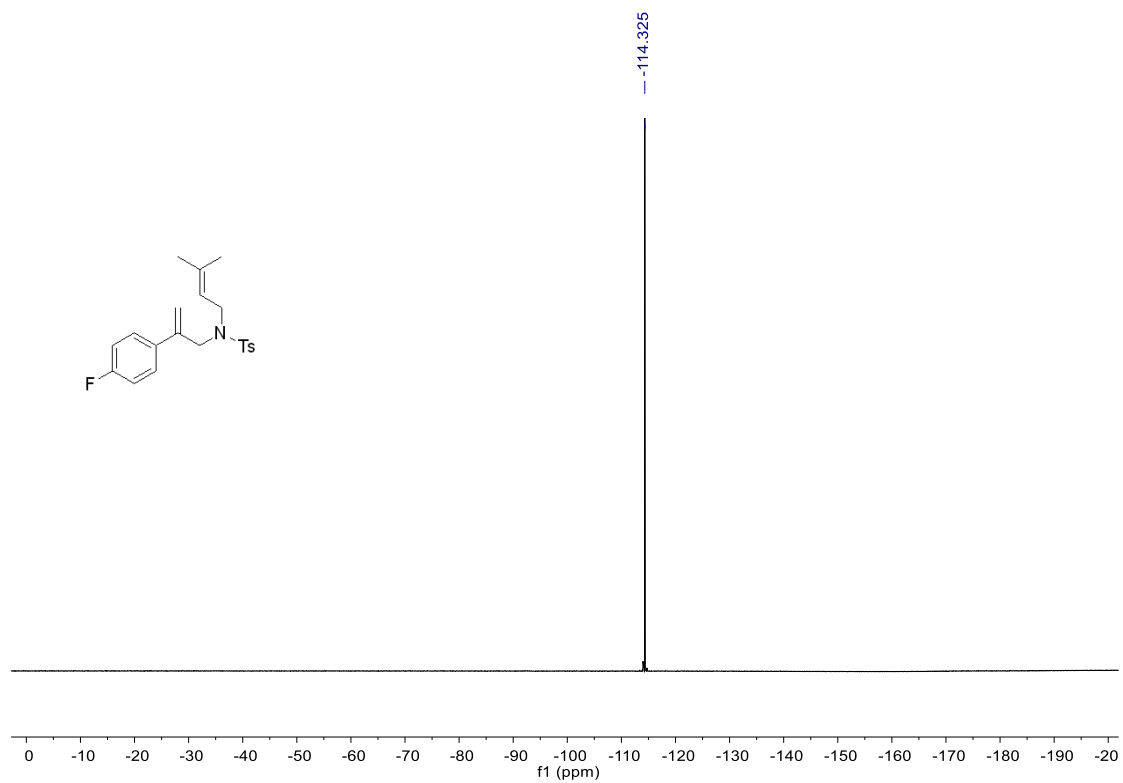



**(1j)**  
**<sup>1</sup>H NMR (CDCl<sub>3</sub>, 400 MHz)**

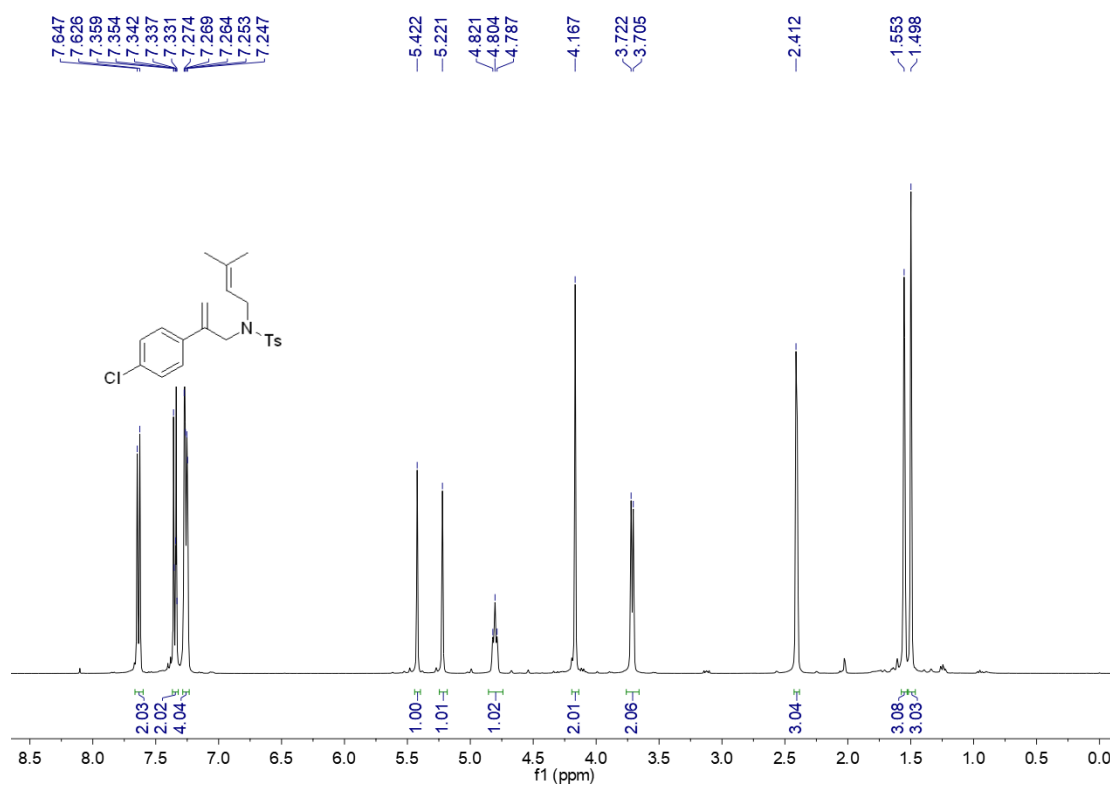

**<sup>13</sup>C NMR (CDCl<sub>3</sub>, 101 MHz)**

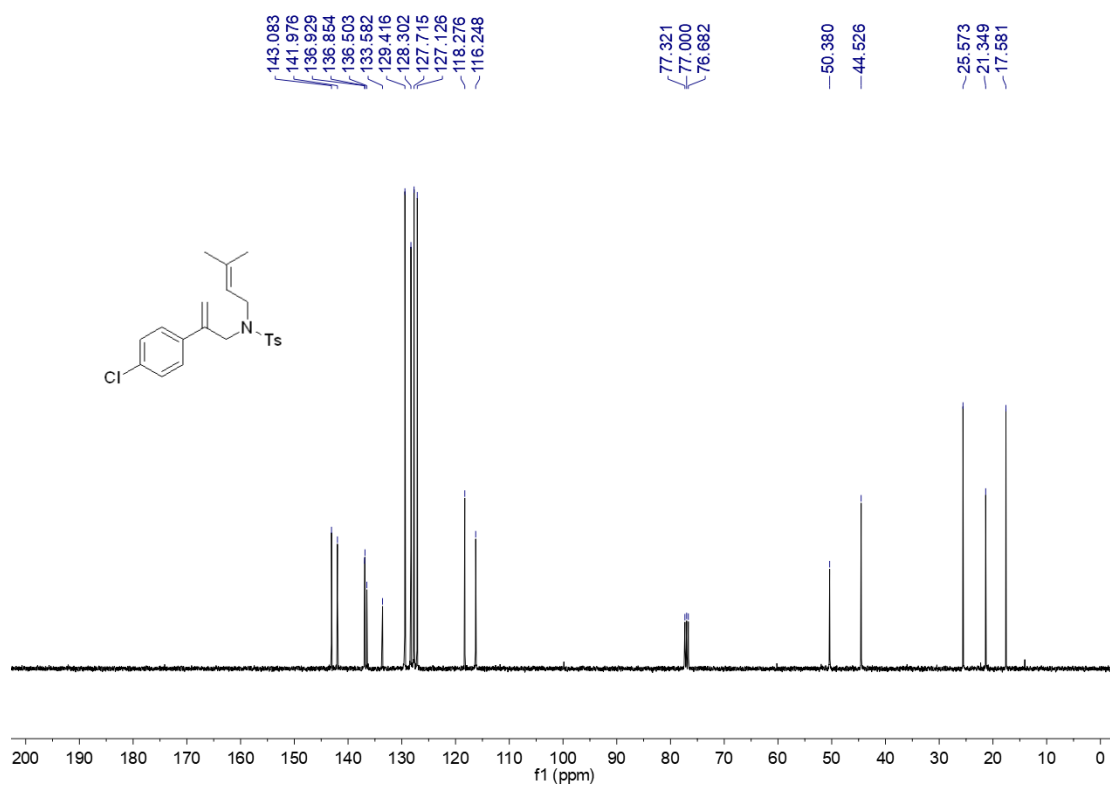

**(1k)**  
<sup>1</sup>H NMR (CDCl<sub>3</sub>, 400 MHz)

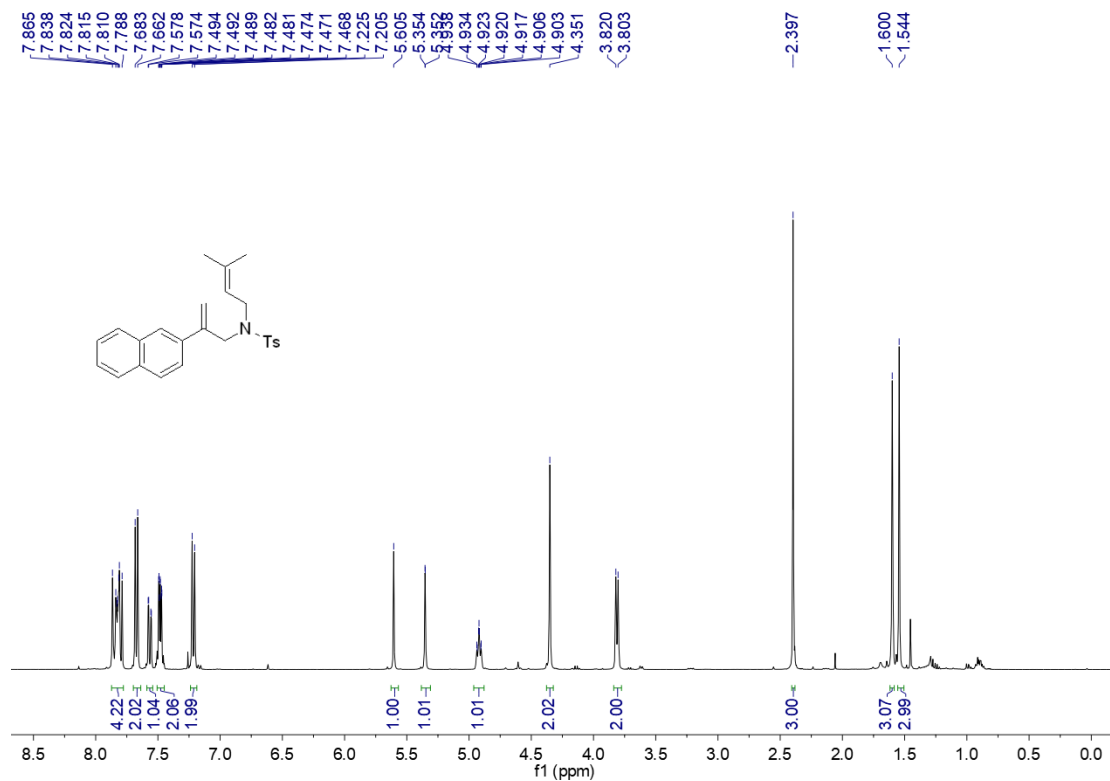

<sup>13</sup>C NMR (CDCl<sub>3</sub>, 101 MHz)

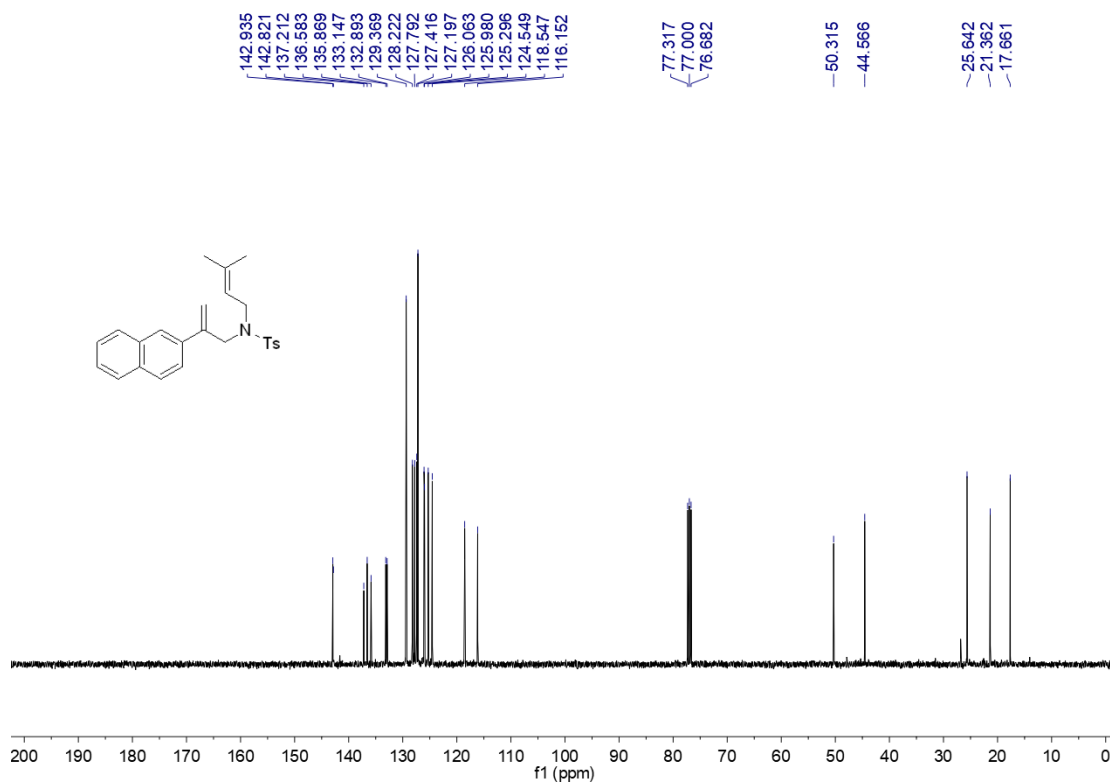

(11)

$^1\text{H}$  NMR ( $\text{CDCl}_3$ , 400 MHz)

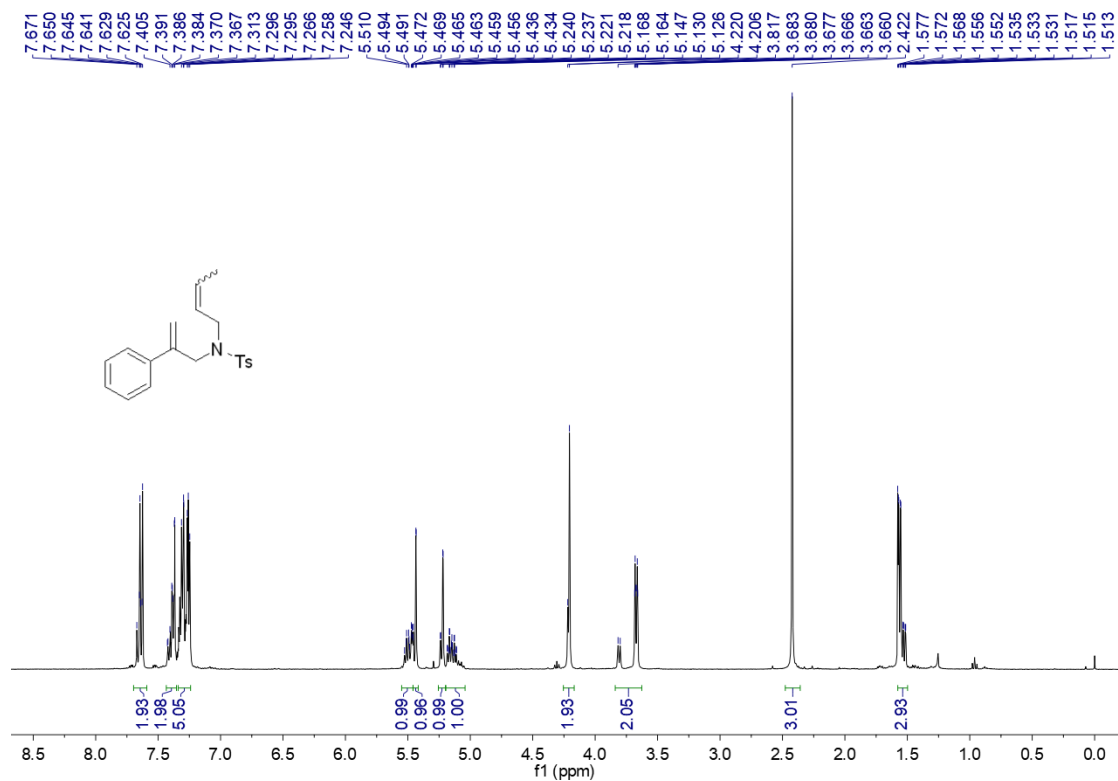

$^{13}\text{C}$  NMR ( $\text{CDCl}_3$ , 101 MHz)

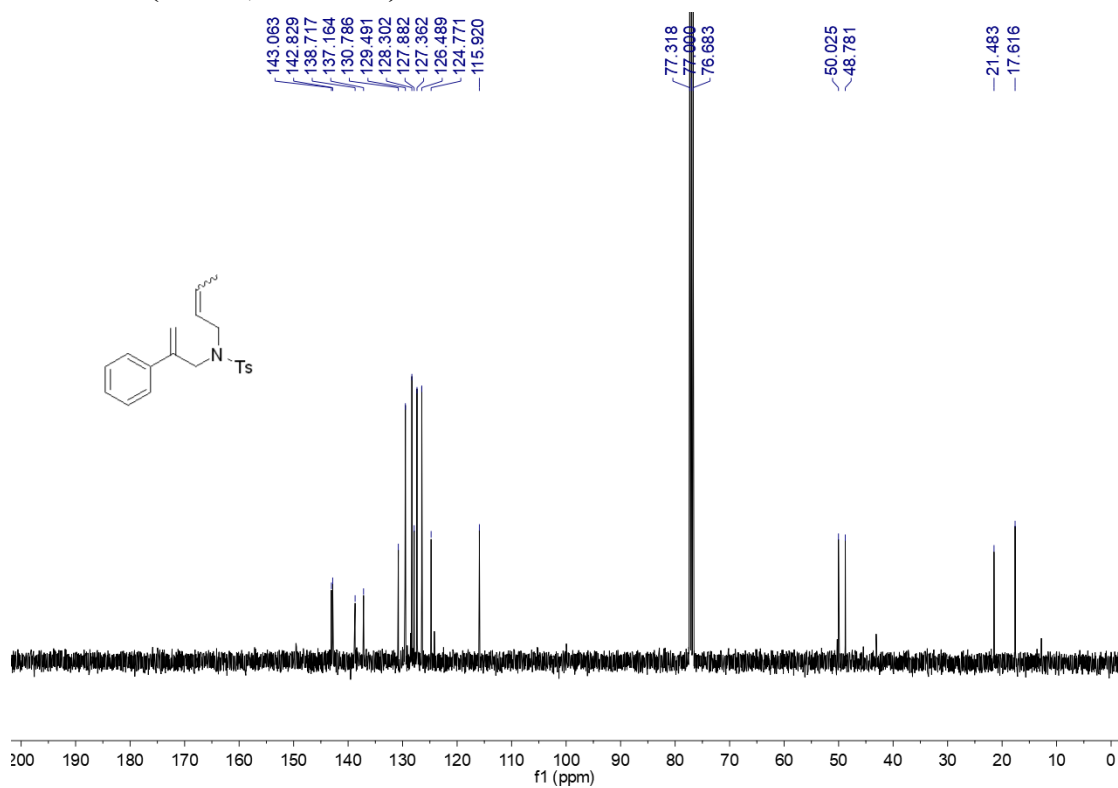

(1o)  
<sup>1</sup>H NMR (CDCl<sub>3</sub>, 400 MHz)

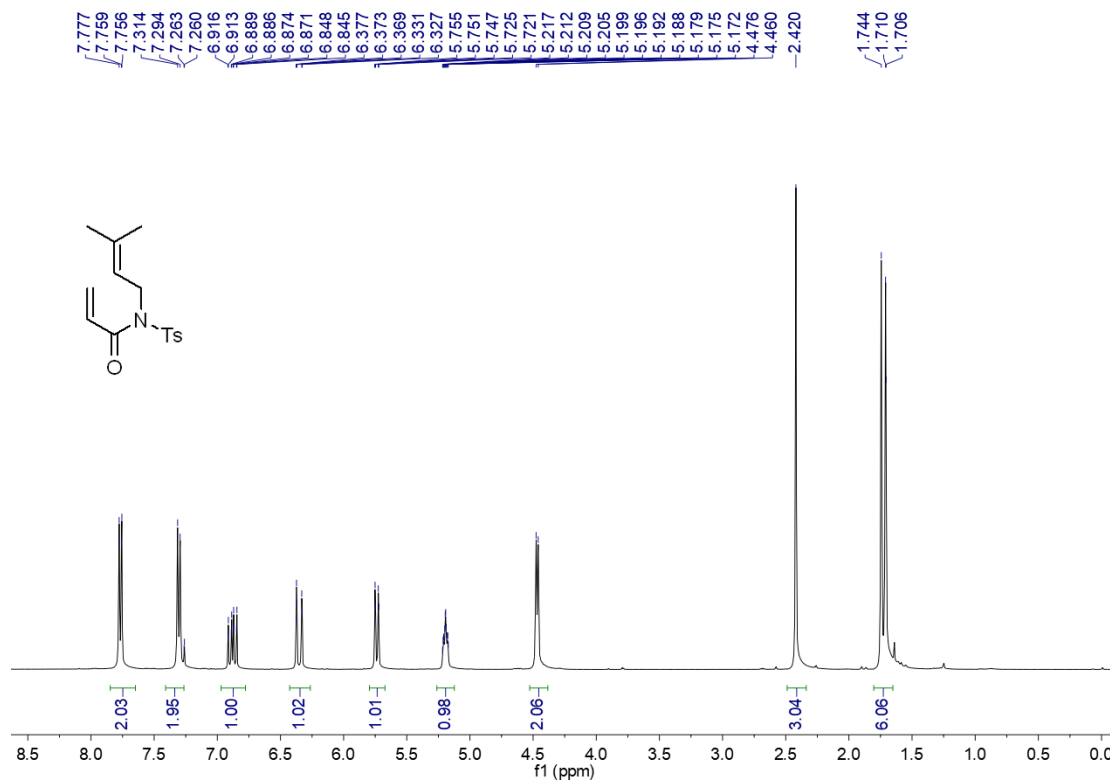

<sup>13</sup>C NMR (CDCl<sub>3</sub>, 101 MHz)

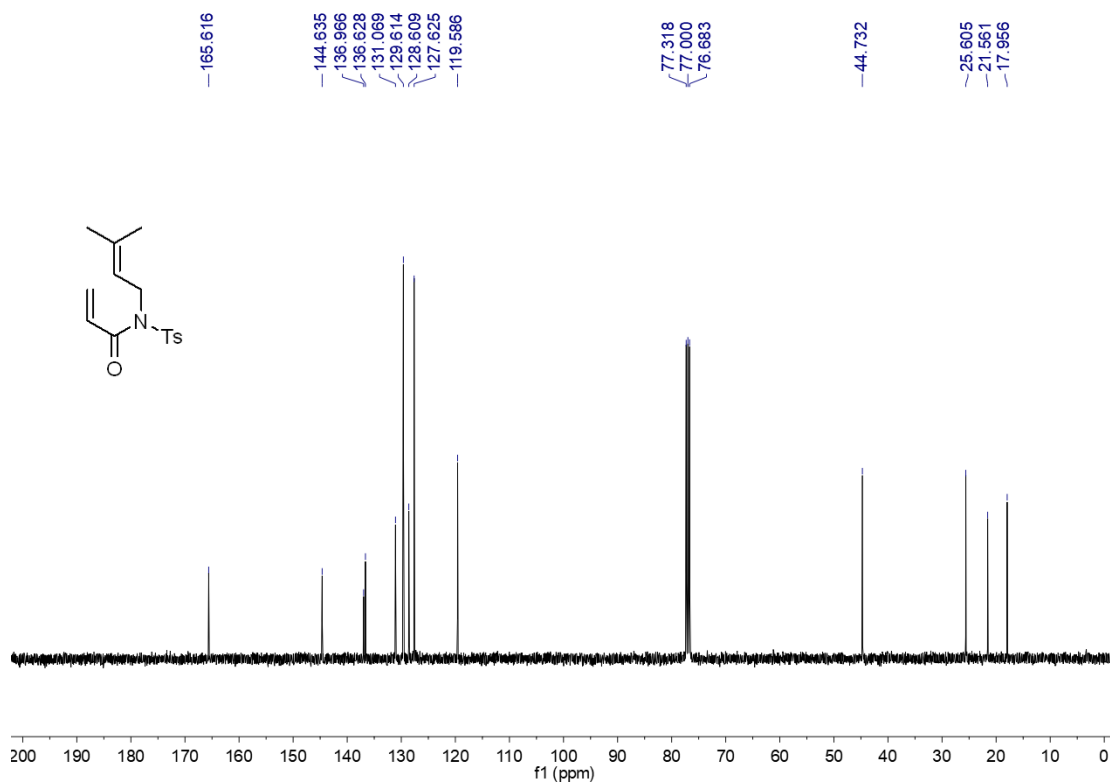

(1s)

$^1\text{H}$  NMR ( $\text{CDCl}_3$ , 400 MHz)

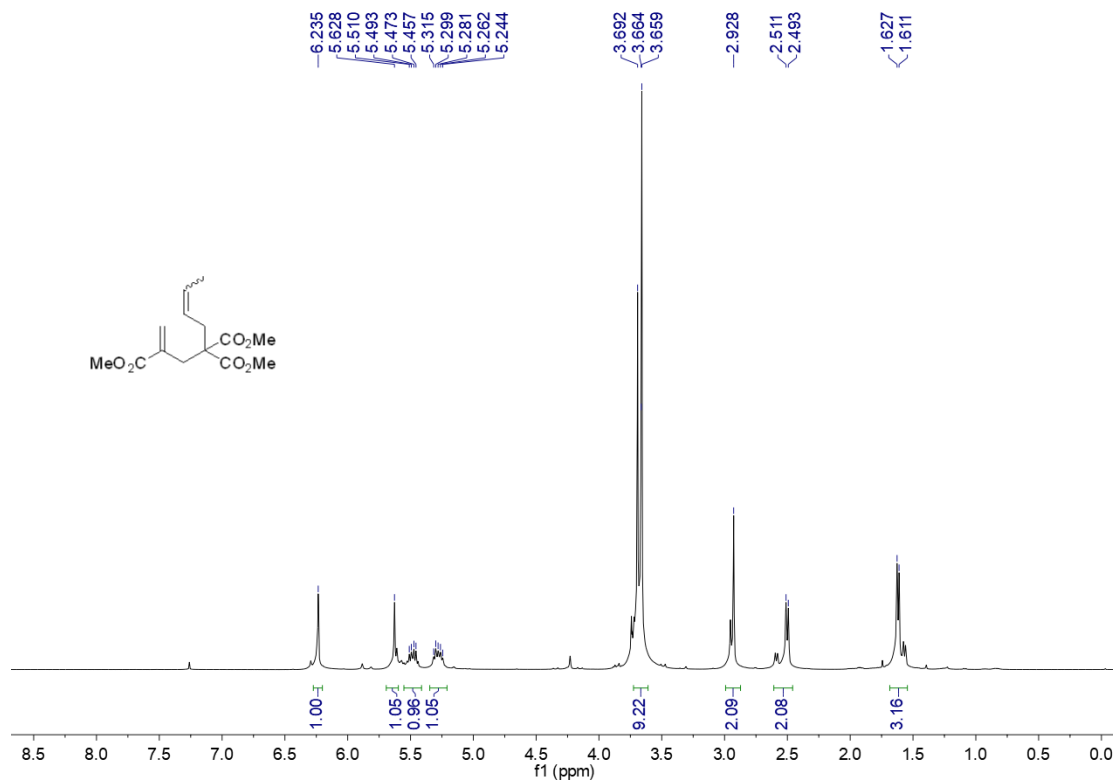

$^{13}\text{C}$  NMR ( $\text{CDCl}_3$ , 101 MHz)

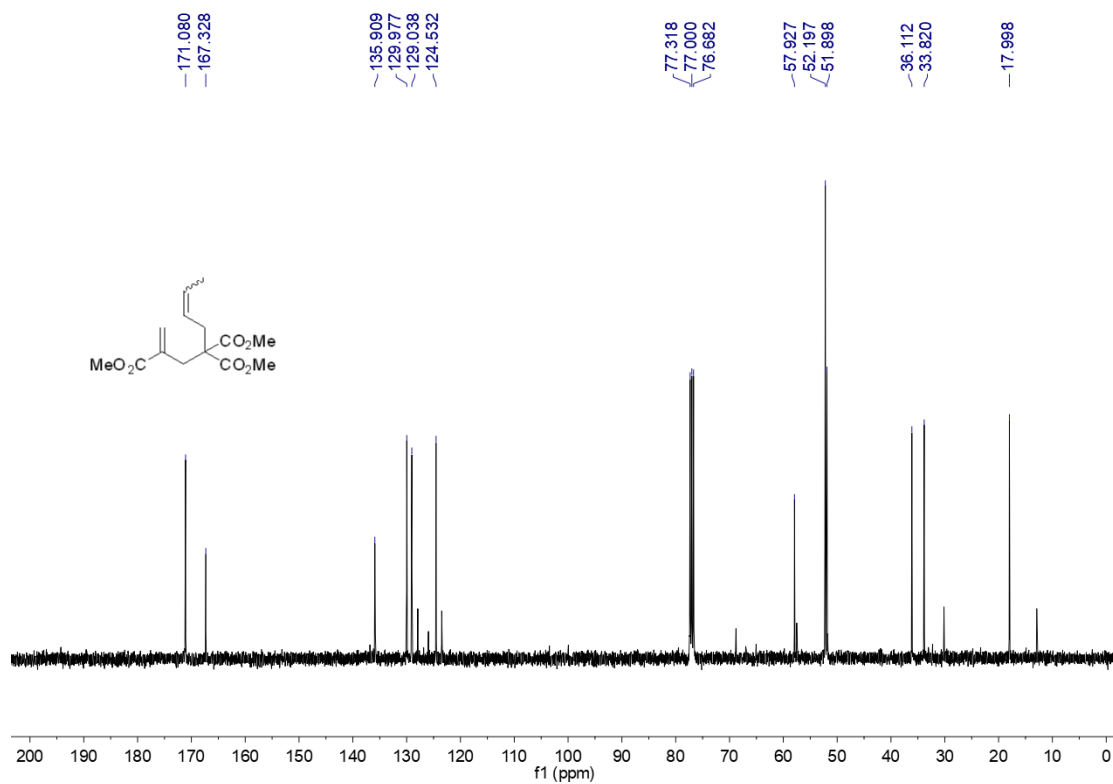

**(1t)**  
<sup>1</sup>H NMR (CDCl<sub>3</sub>, 400 MHz)

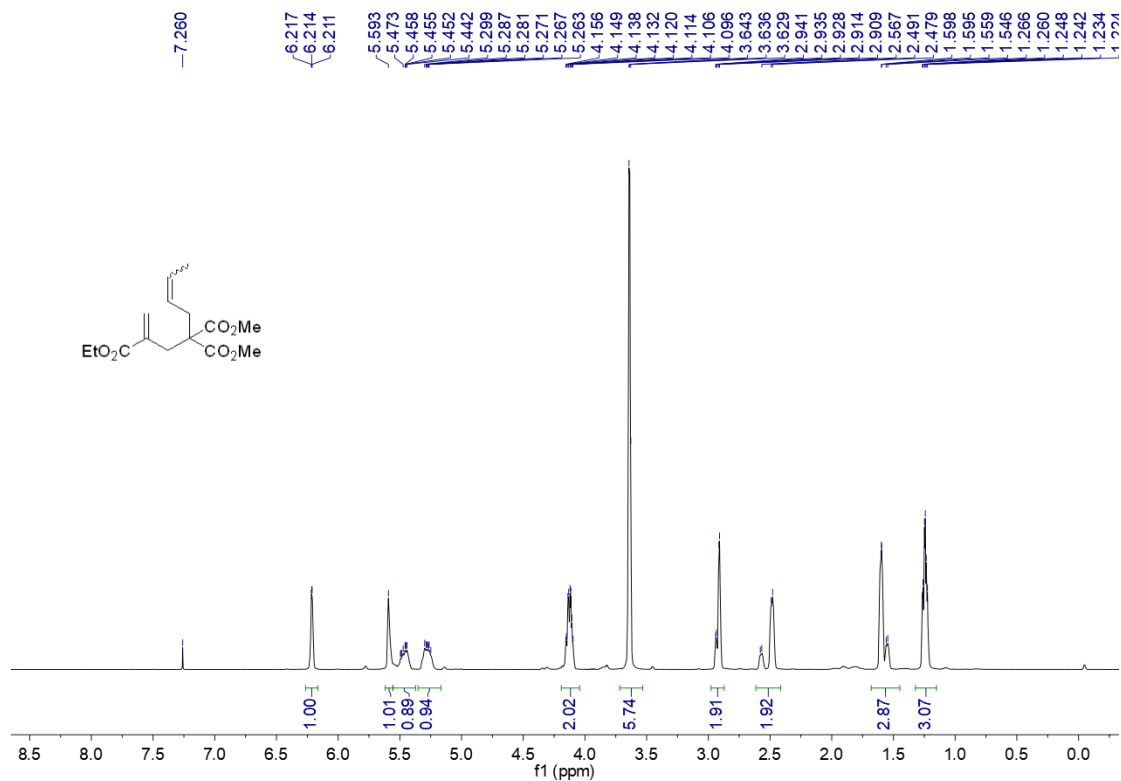

<sup>13</sup>C NMR (CDCl<sub>3</sub>, 101 MHz)

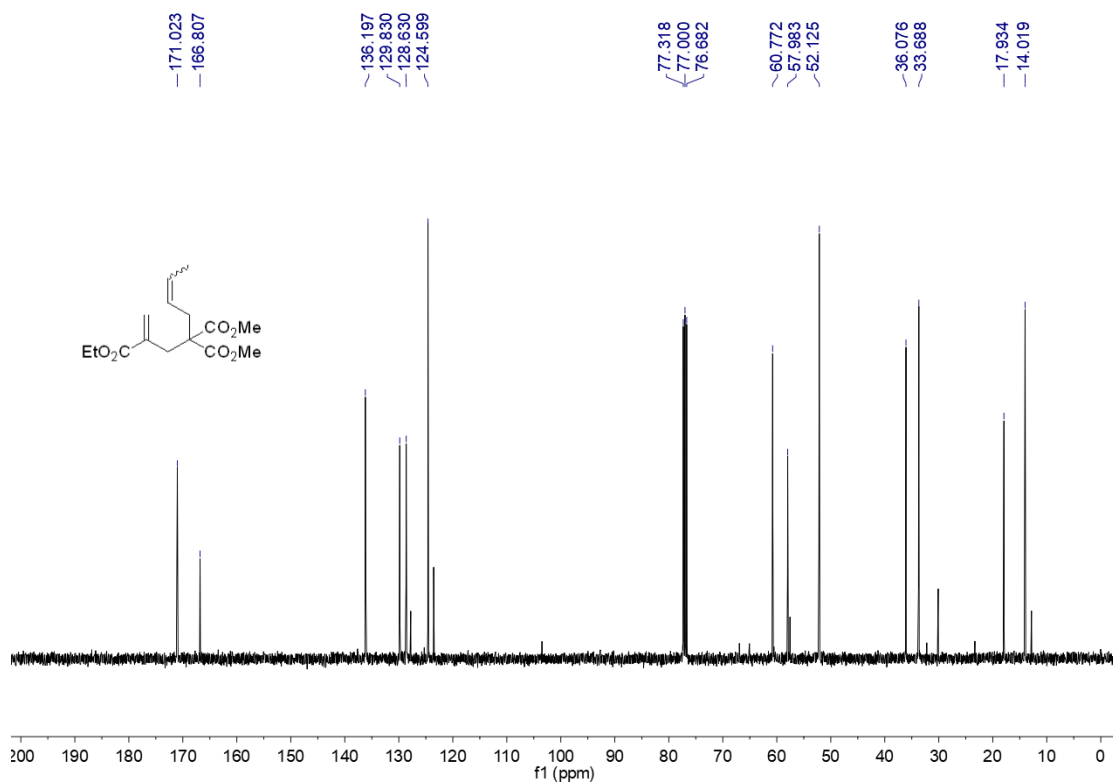

**(1u)**  
<sup>1</sup>H NMR (CDCl<sub>3</sub>, 400 MHz)

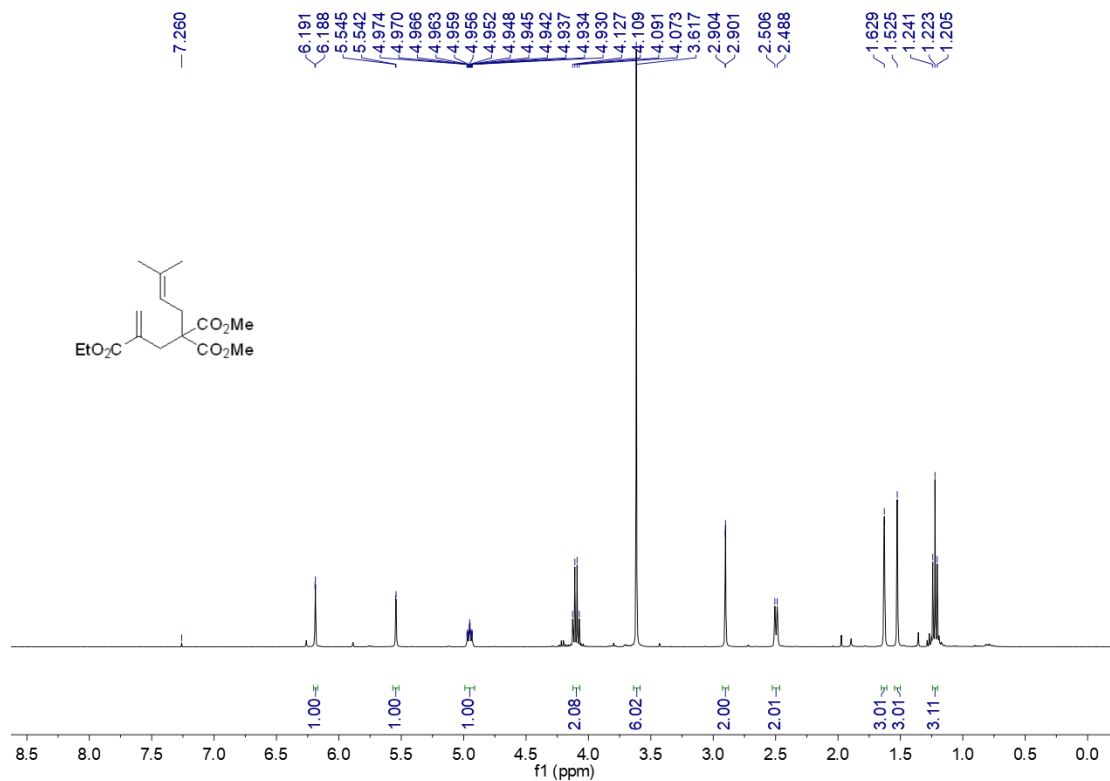

<sup>13</sup>C NMR (CDCl<sub>3</sub>, 101 MHz)

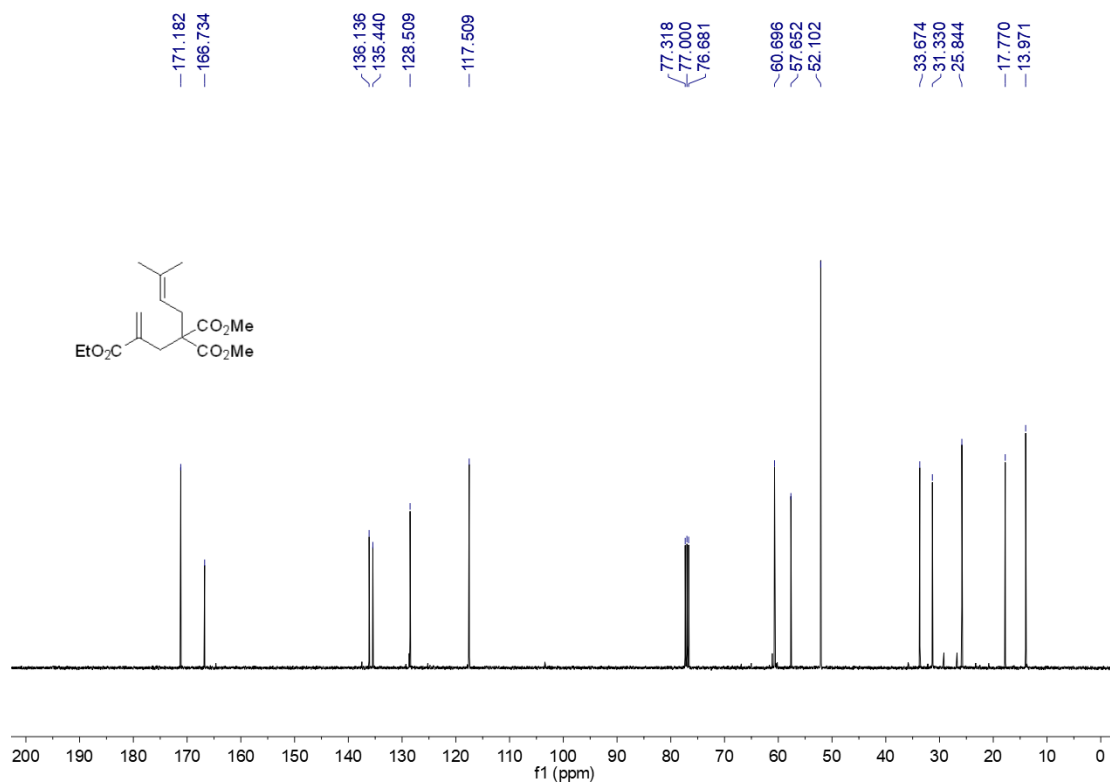

(1v)  
<sup>1</sup>H NMR (CDCl<sub>3</sub>, 400 MHz)

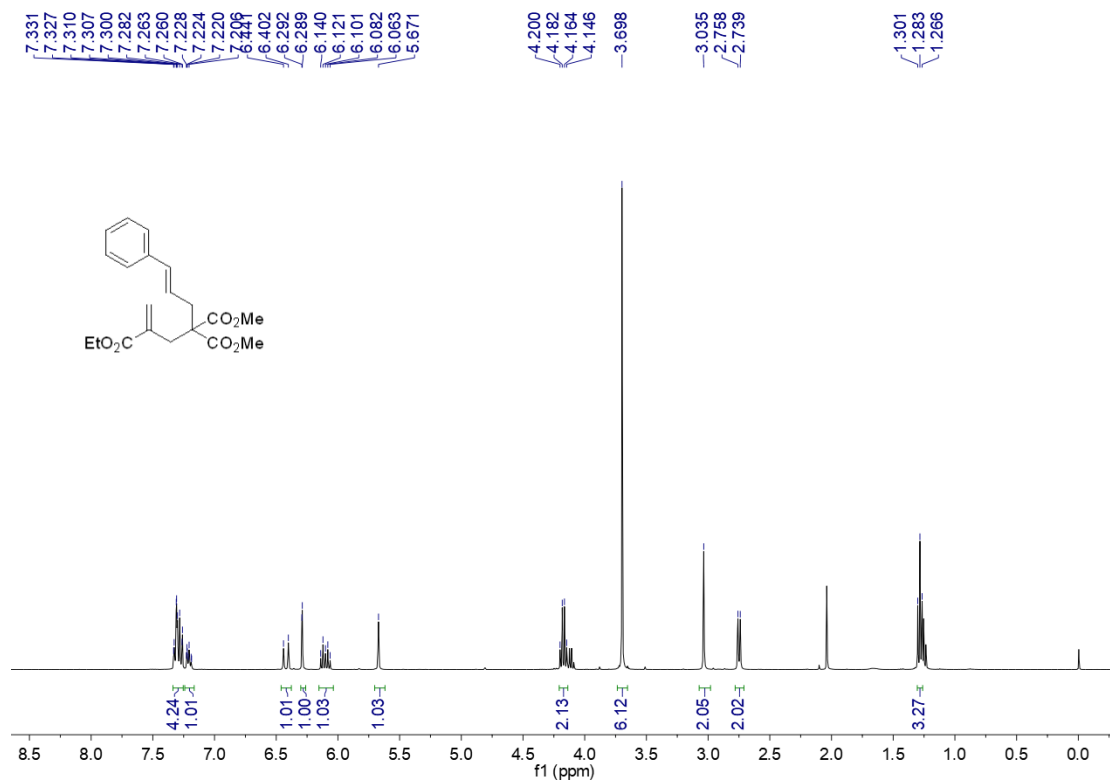

<sup>13</sup>C NMR (CDCl<sub>3</sub>, 101 MHz)

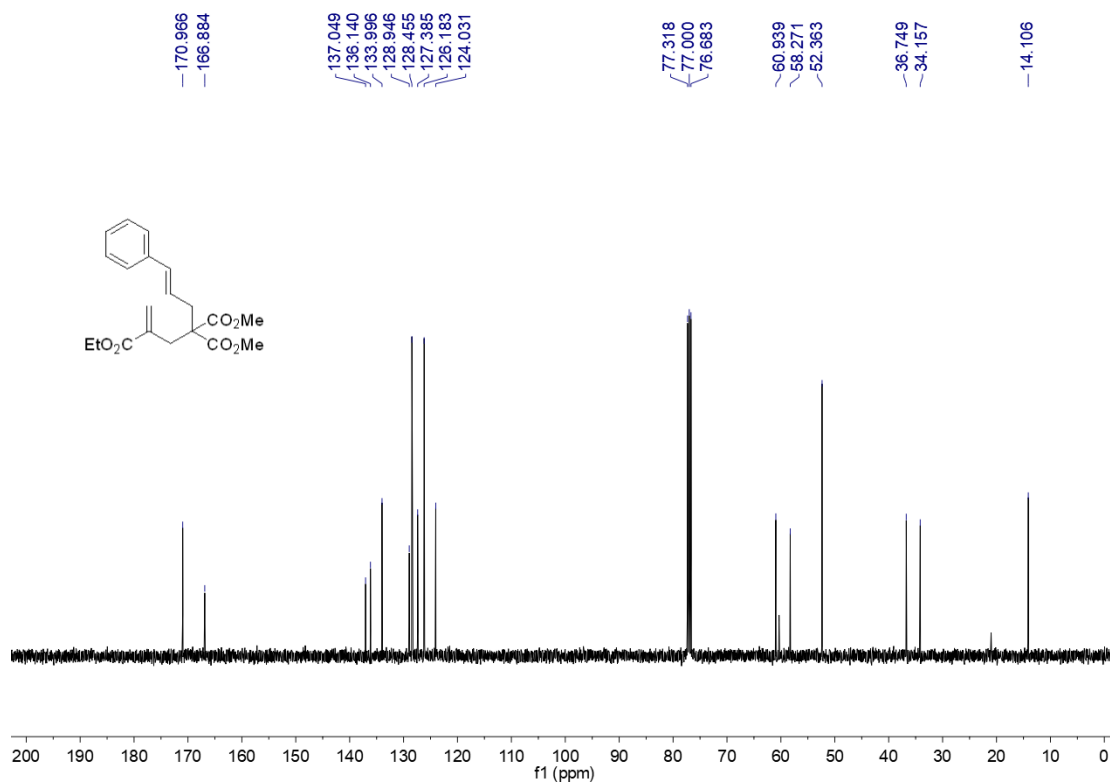



**(1w)**  
<sup>1</sup>H NMR (CDCl<sub>3</sub>, 400 MHz)

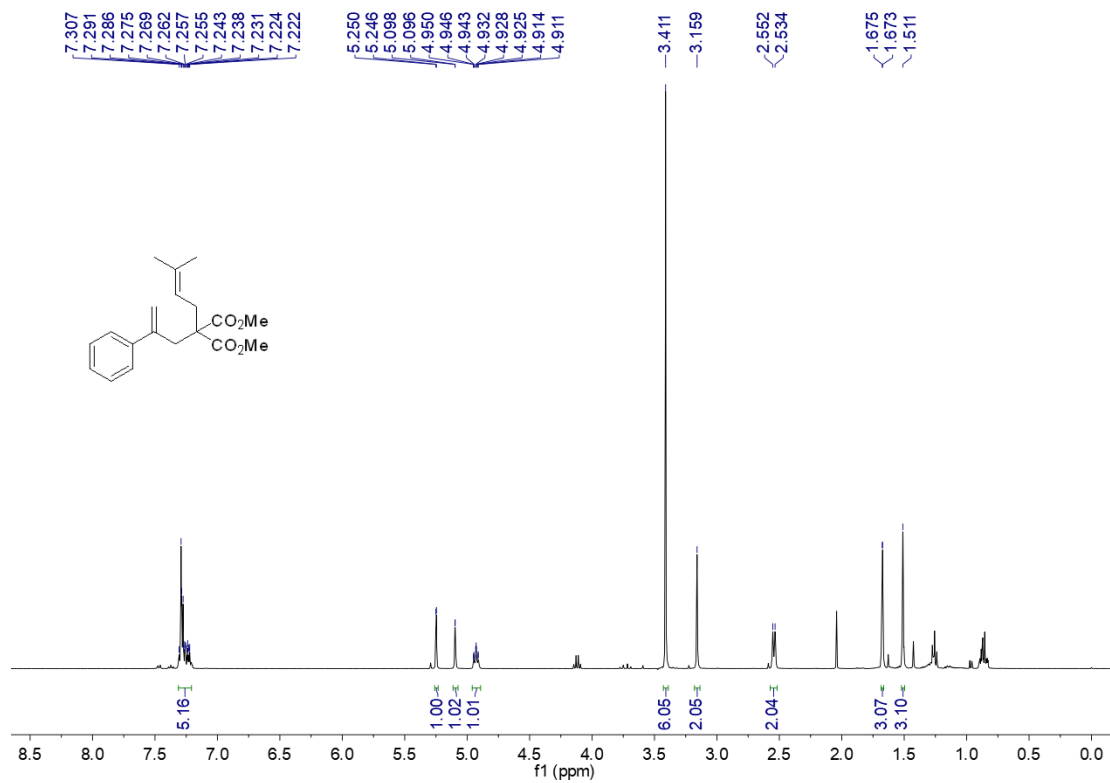

<sup>13</sup>C NMR (CDCl<sub>3</sub>, 101 MHz)

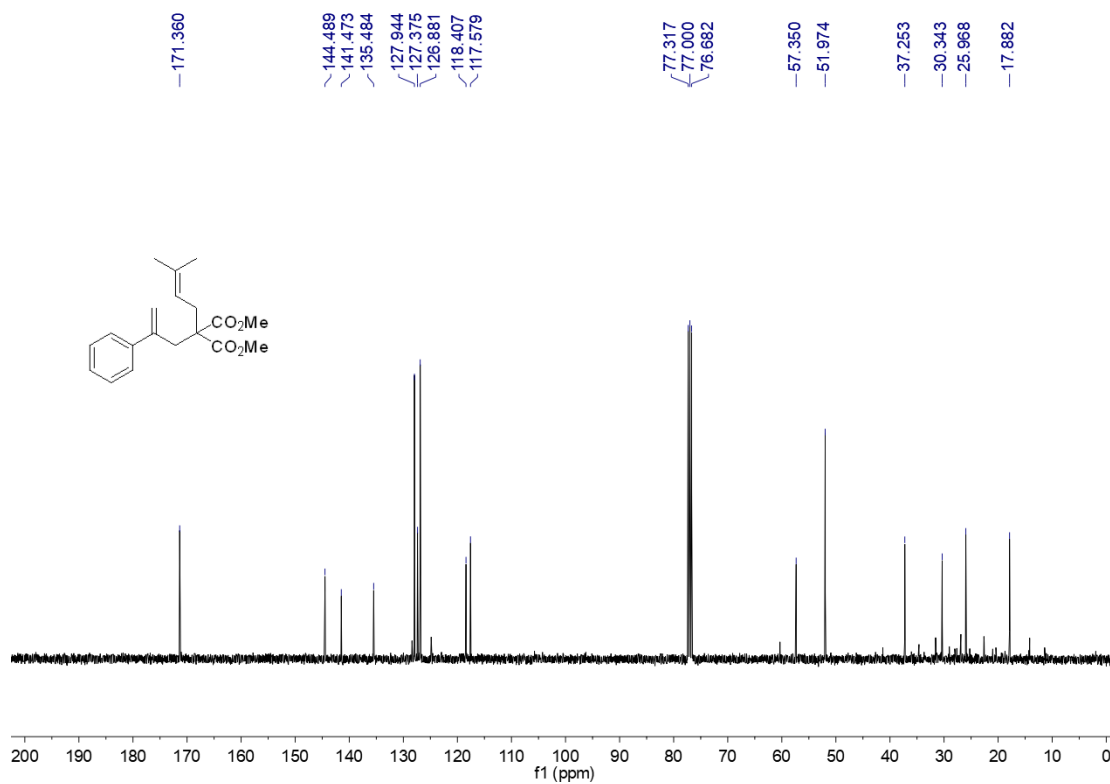

**(3b)**  
**<sup>1</sup>H NMR (CDCl<sub>3</sub>, 400 MHz)**

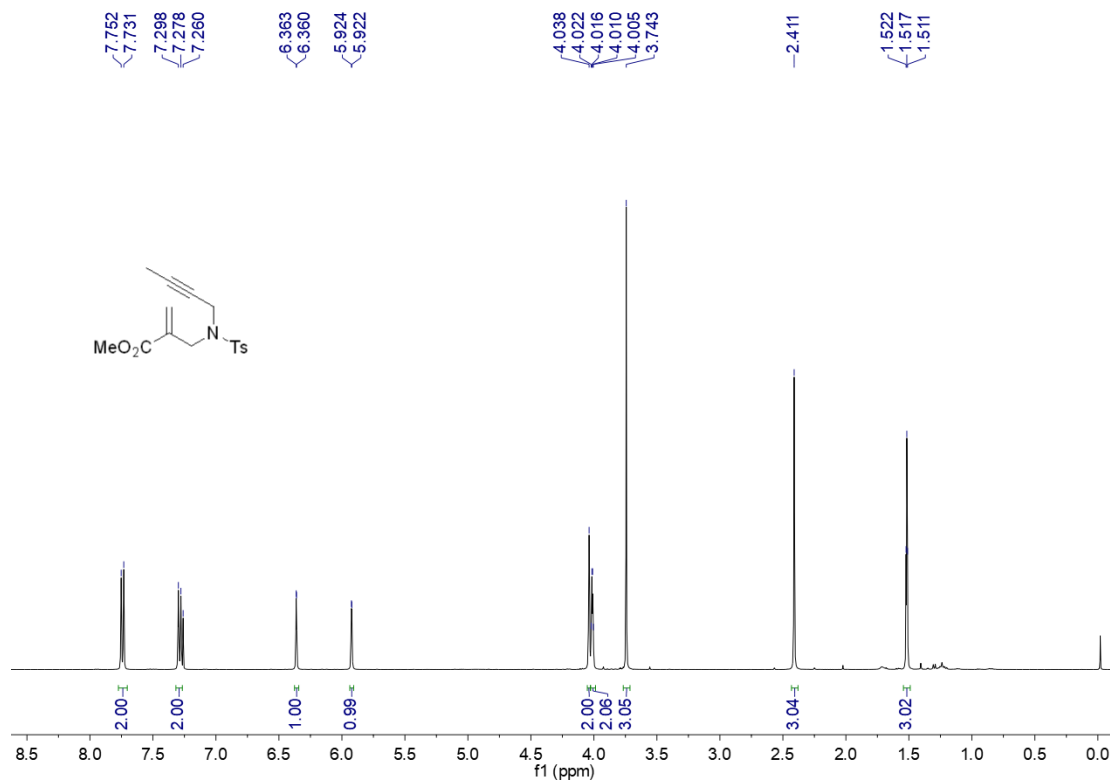

**<sup>13</sup>C NMR (CDCl<sub>3</sub>, 101 MHz)**

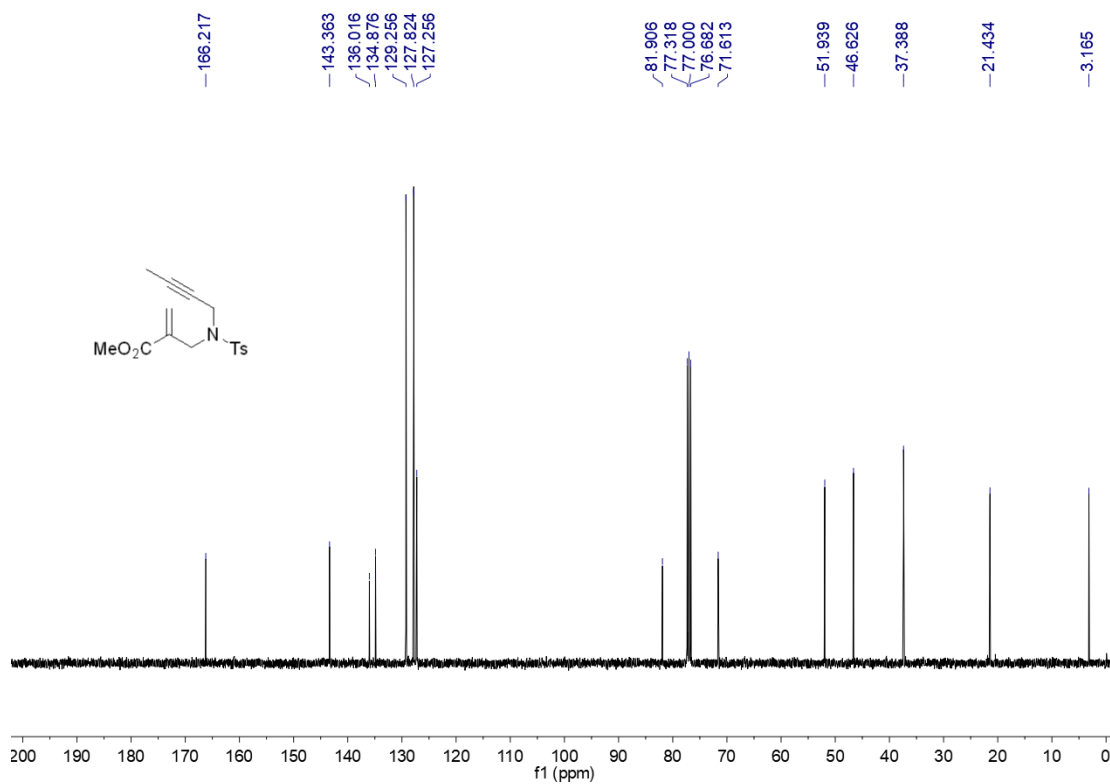

**(3d)**  
**<sup>1</sup>H NMR (CDCl<sub>3</sub>, 400 MHz)**

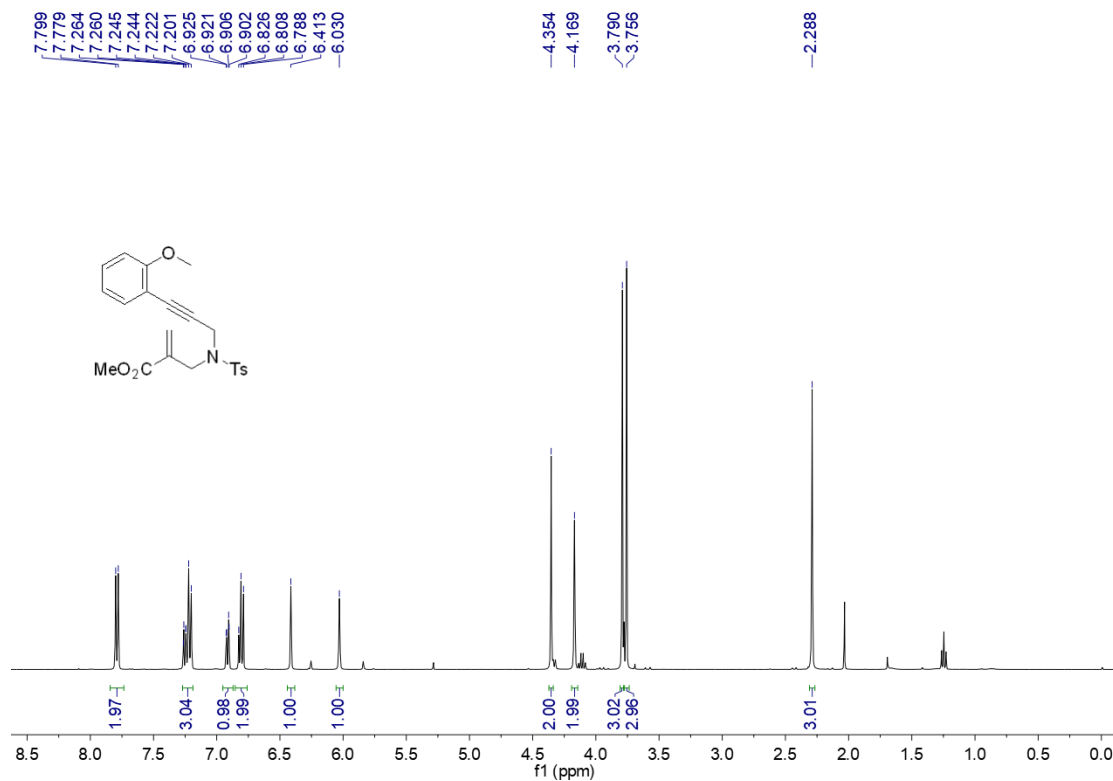

**<sup>13</sup>C NMR (CDCl<sub>3</sub>, 101 MHz)**

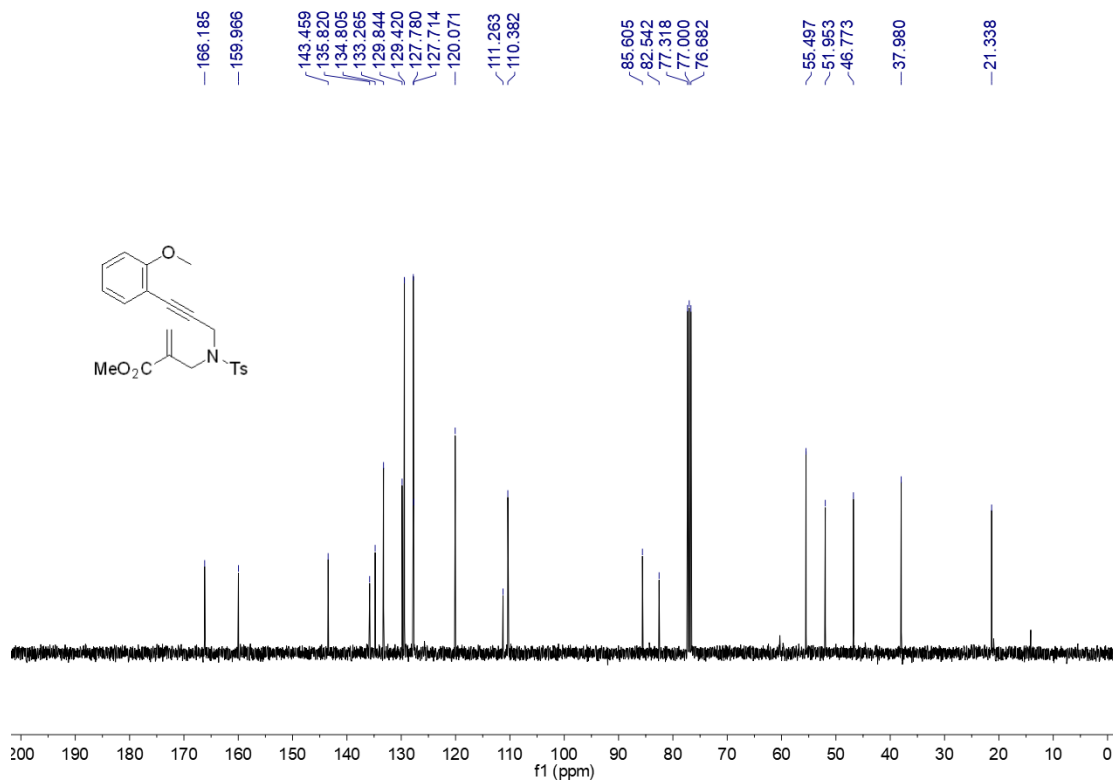

(3e)

$^1\text{H}$  NMR ( $\text{CDCl}_3$ , 400 MHz)

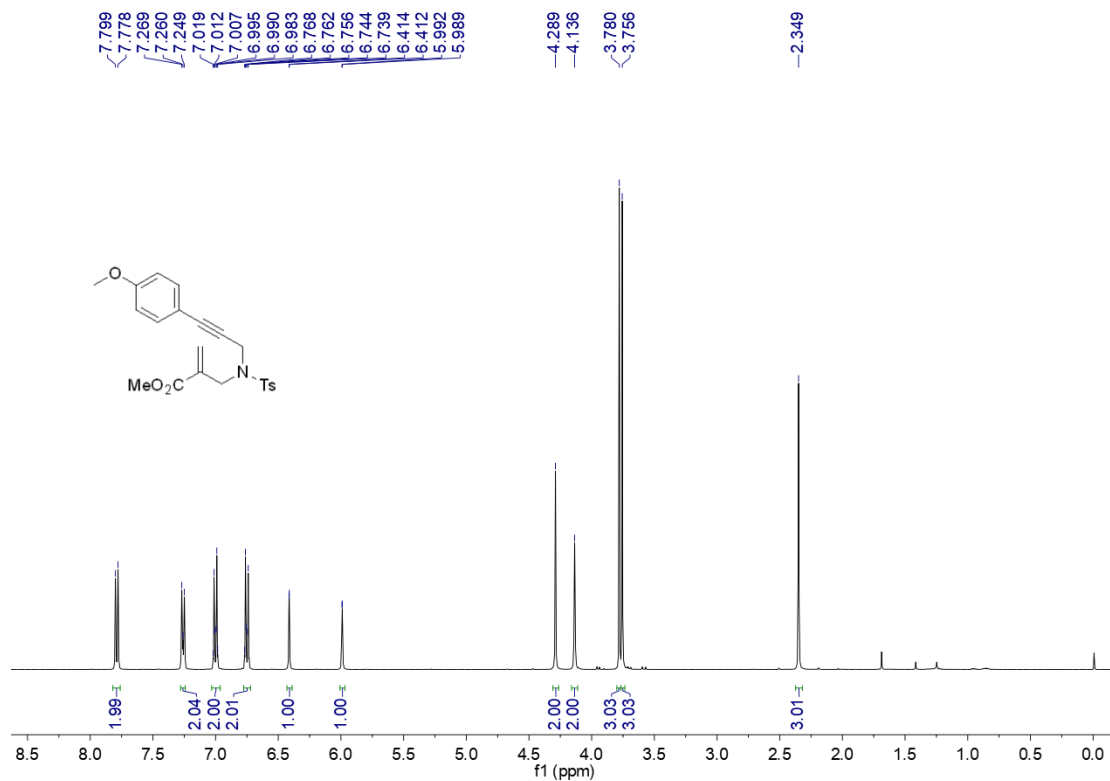

$^{13}\text{C}$  NMR ( $\text{CDCl}_3$ , 101 MHz)

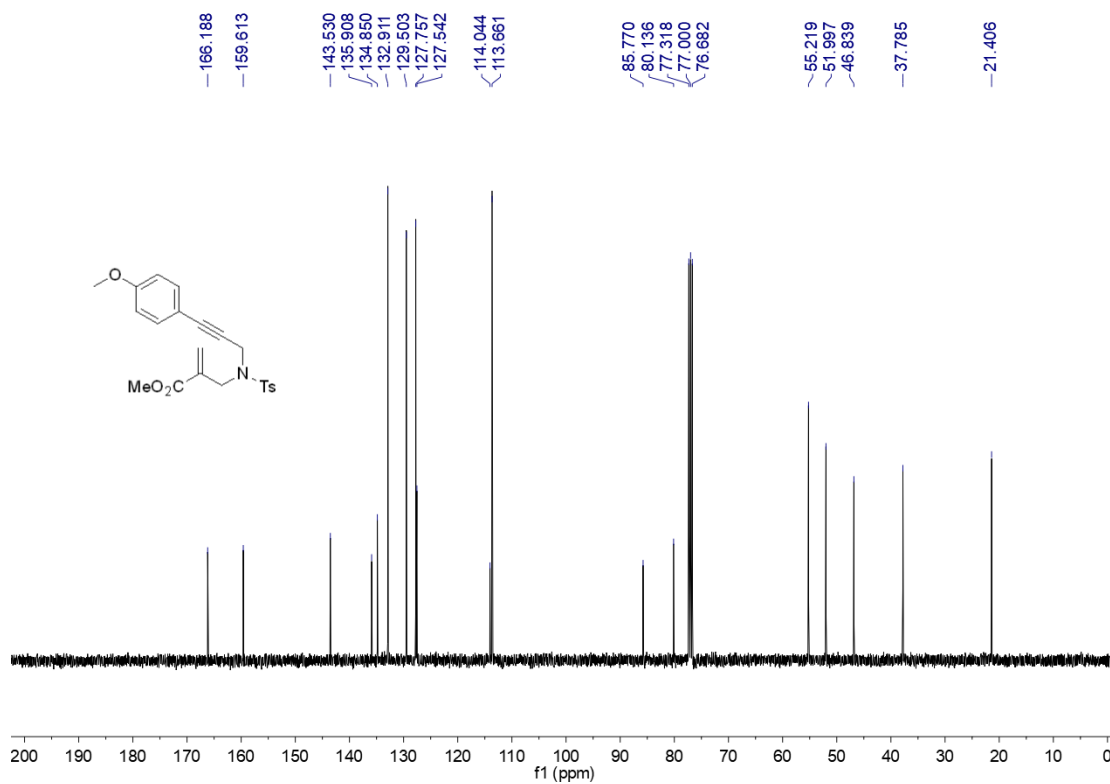

(3f)  
<sup>1</sup>H NMR (CDCl<sub>3</sub>, 400 MHz)

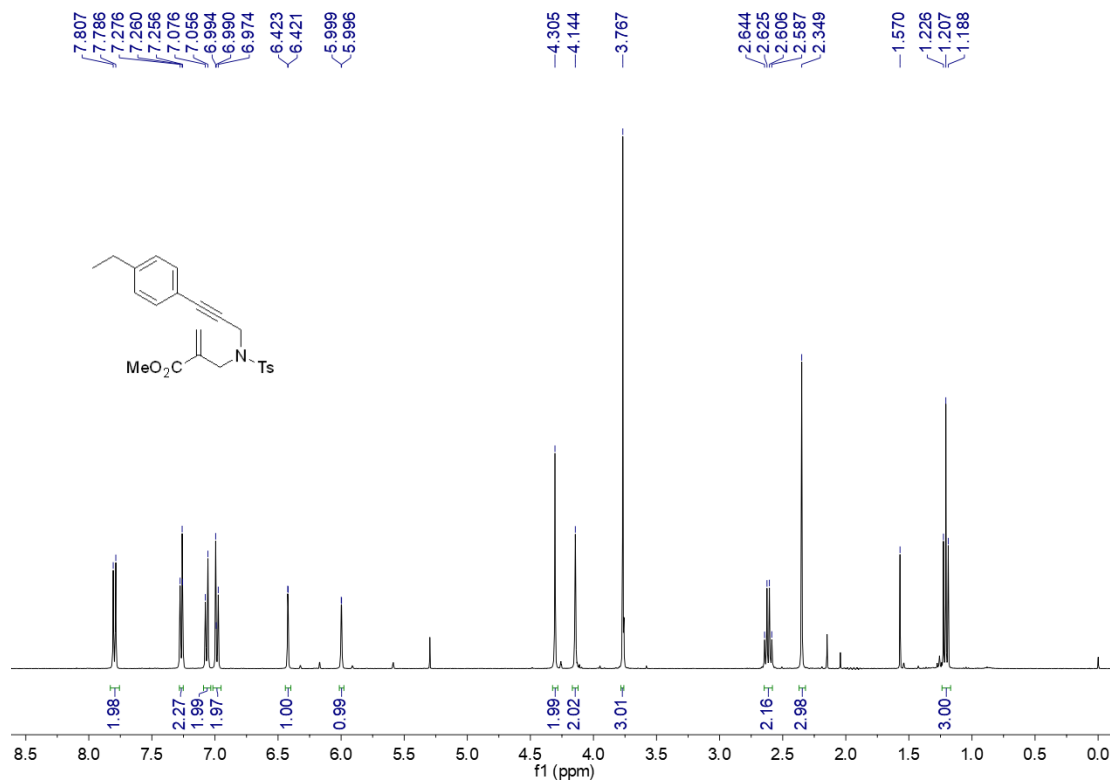

<sup>13</sup>C NMR (CDCl<sub>3</sub>, 101 MHz)

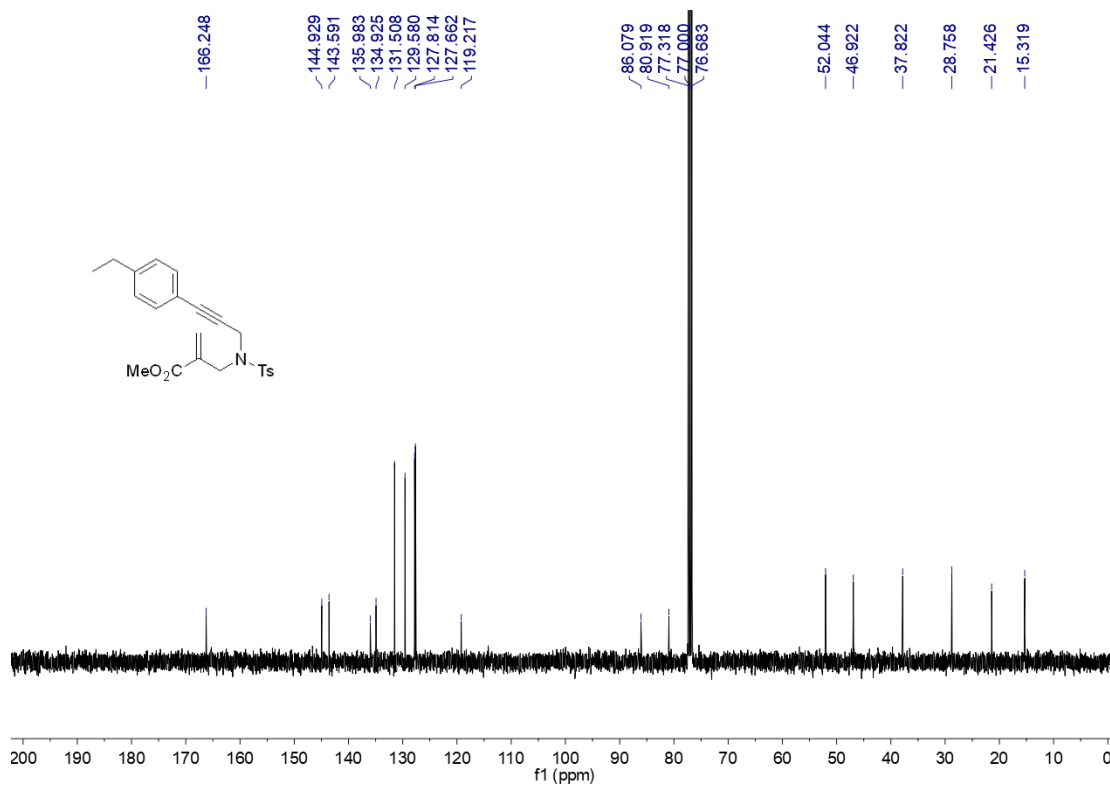

**(3g)**  
**<sup>1</sup>H NMR (CDCl<sub>3</sub>, 400 MHz)**

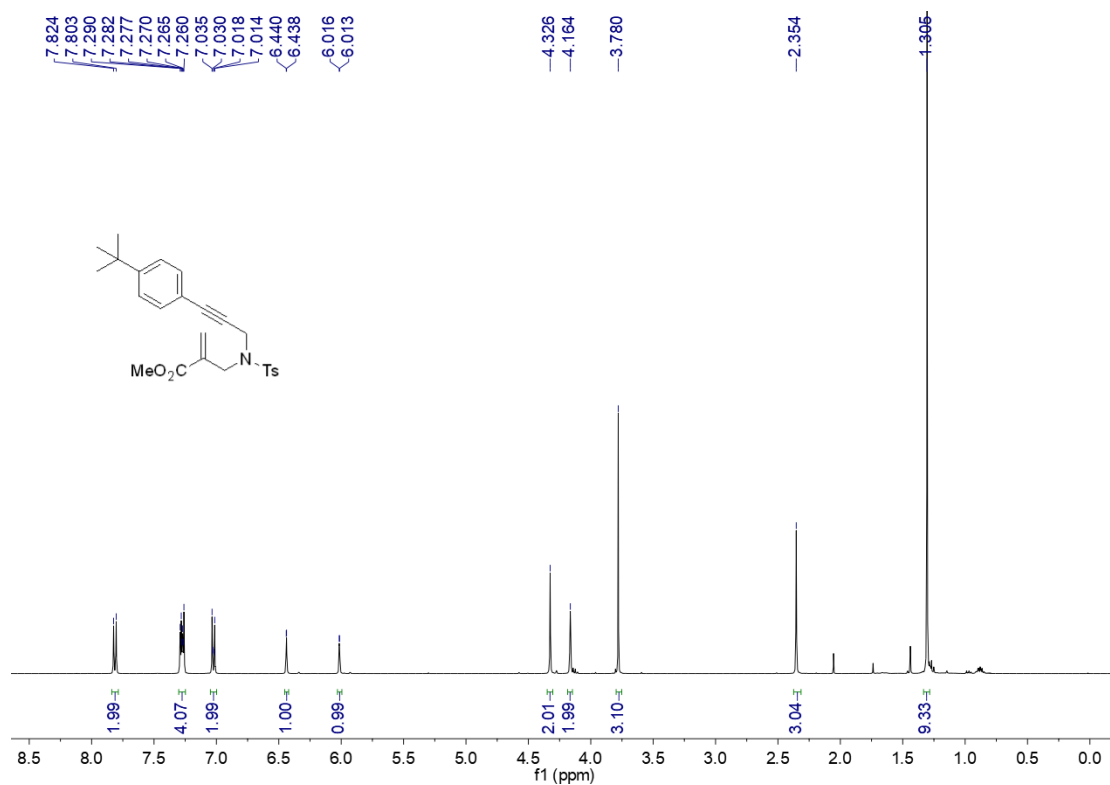

**<sup>13</sup>C NMR (CDCl<sub>3</sub>, 101 MHz)**

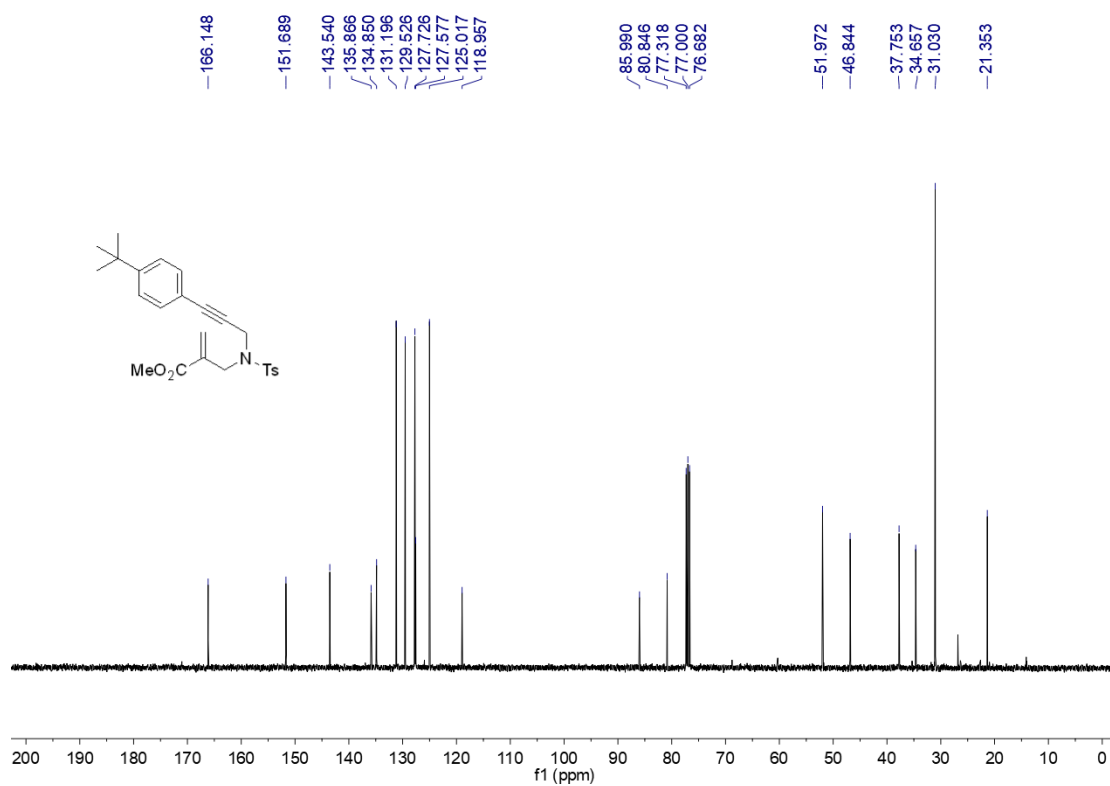

**(3h)**  
**<sup>1</sup>H NMR (CDCl<sub>3</sub>, 400 MHz)**

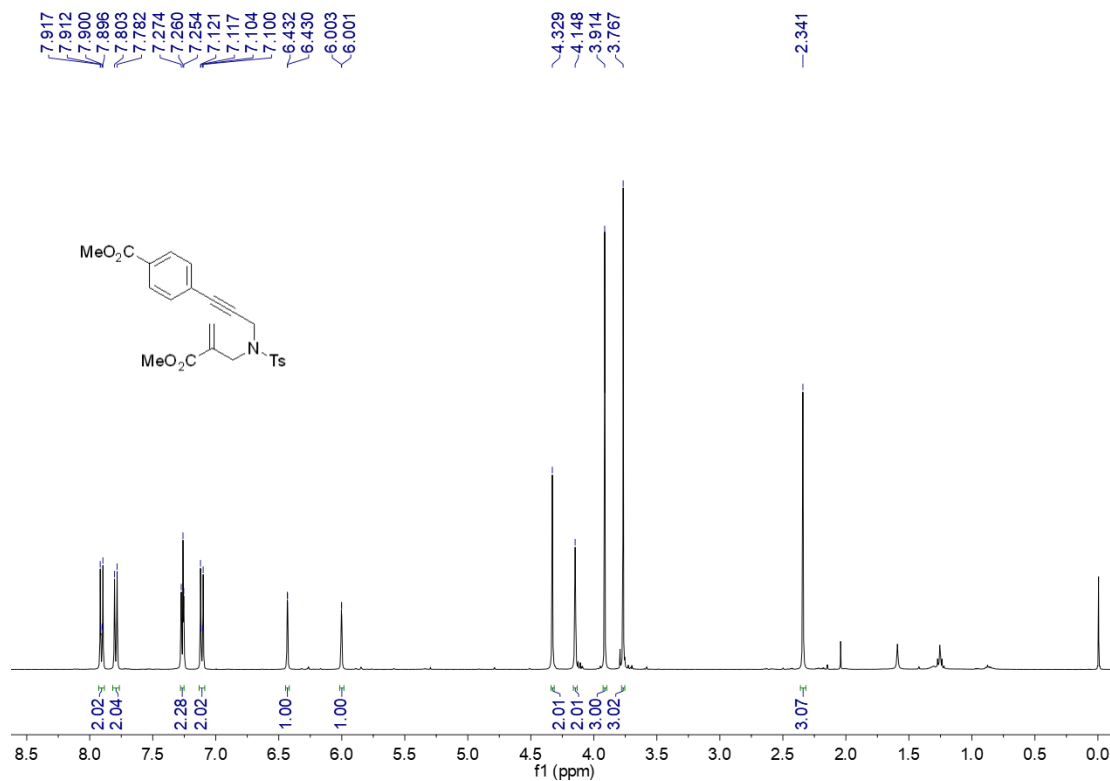

**<sup>13</sup>C NMR (CDCl<sub>3</sub>, 101 MHz)**

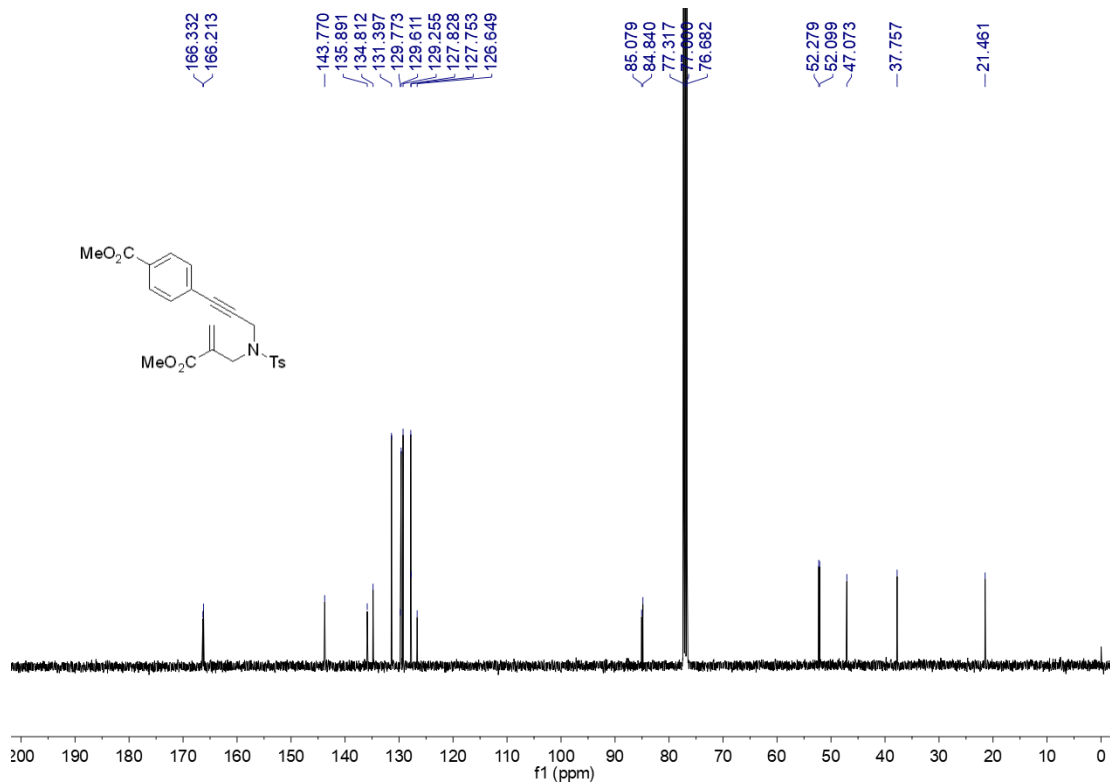

(3i)

<sup>1</sup>H NMR (CDCl<sub>3</sub>, 400 MHz)

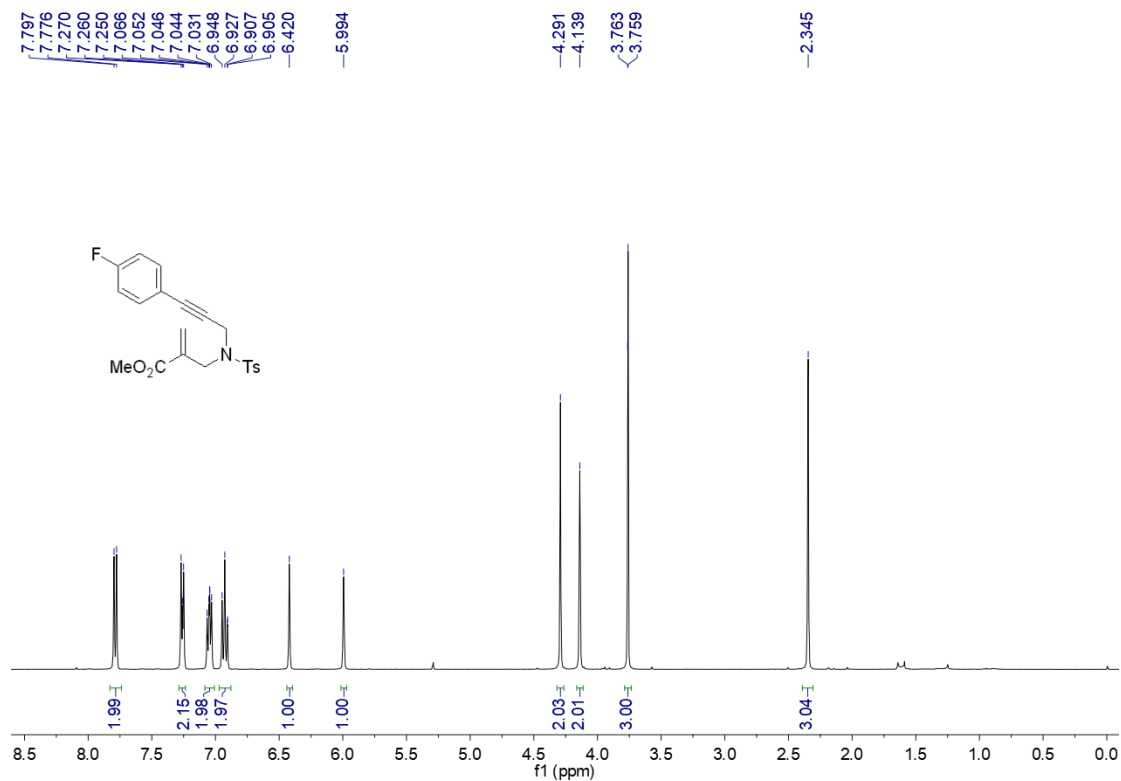

<sup>13</sup>C NMR (CDCl<sub>3</sub>, 101 MHz)

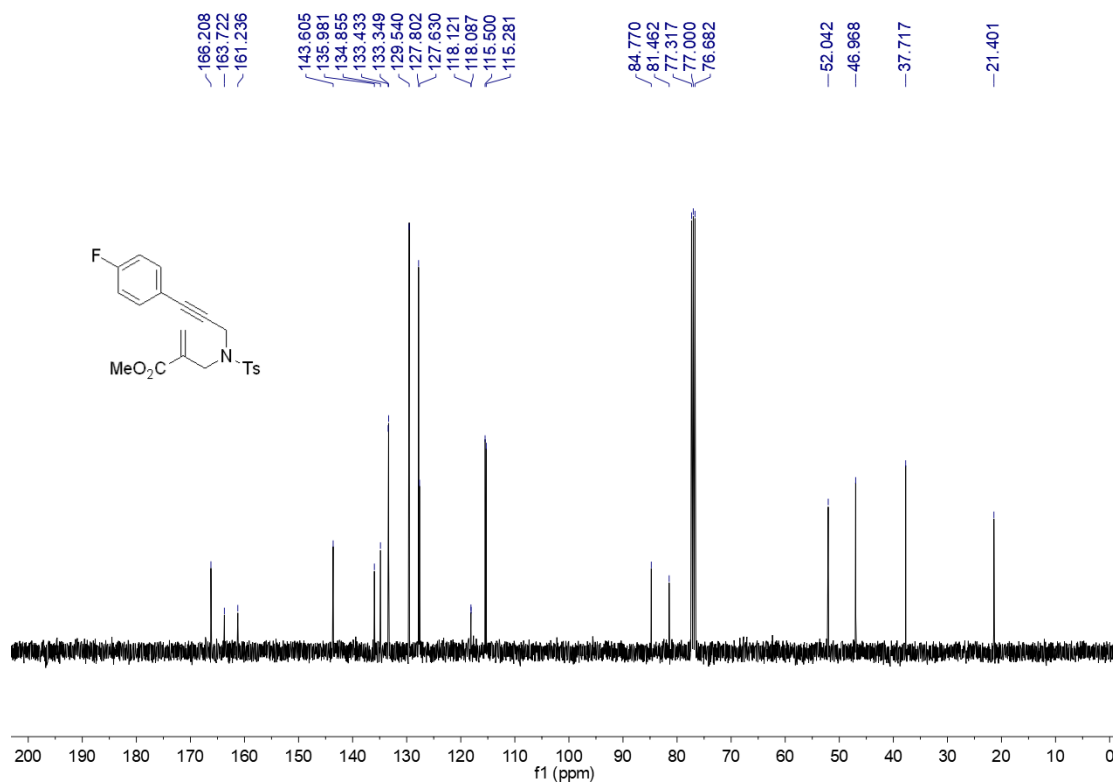



**$^{19}\text{F}$  NMR (CDCl<sub>3</sub>, 376 MHz)**

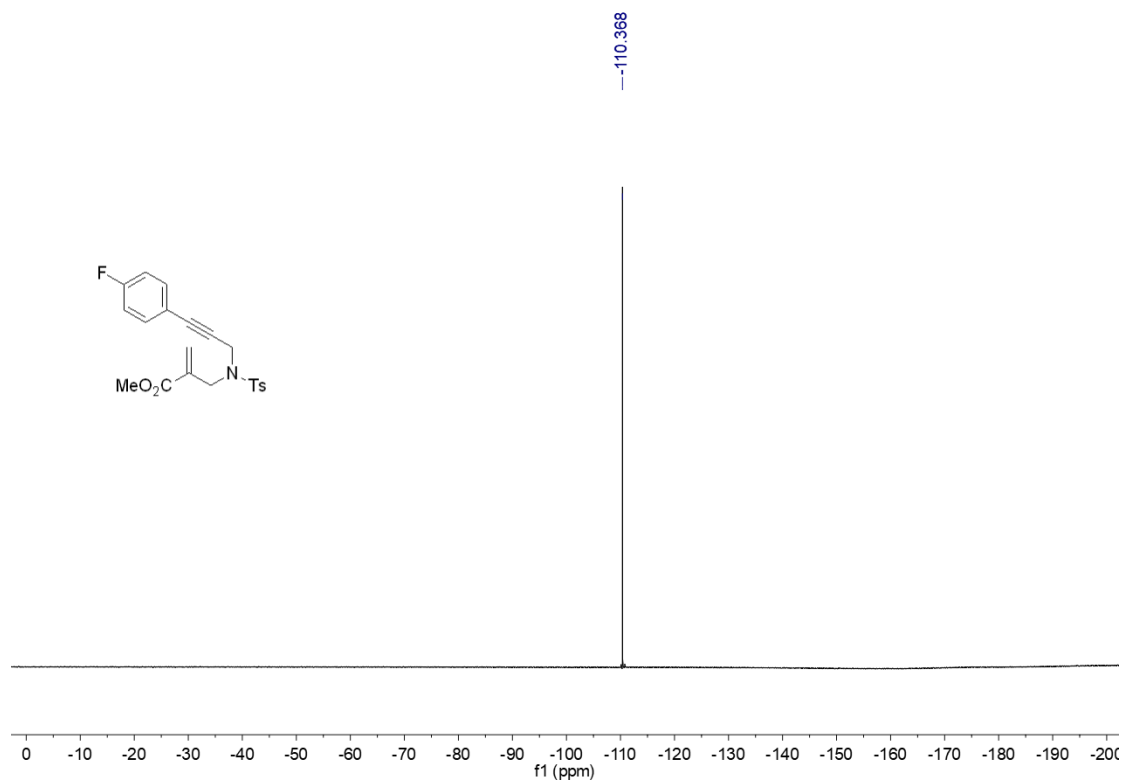

**(3j)**  
**<sup>1</sup>H NMR (CDCl<sub>3</sub>, 400 MHz)**

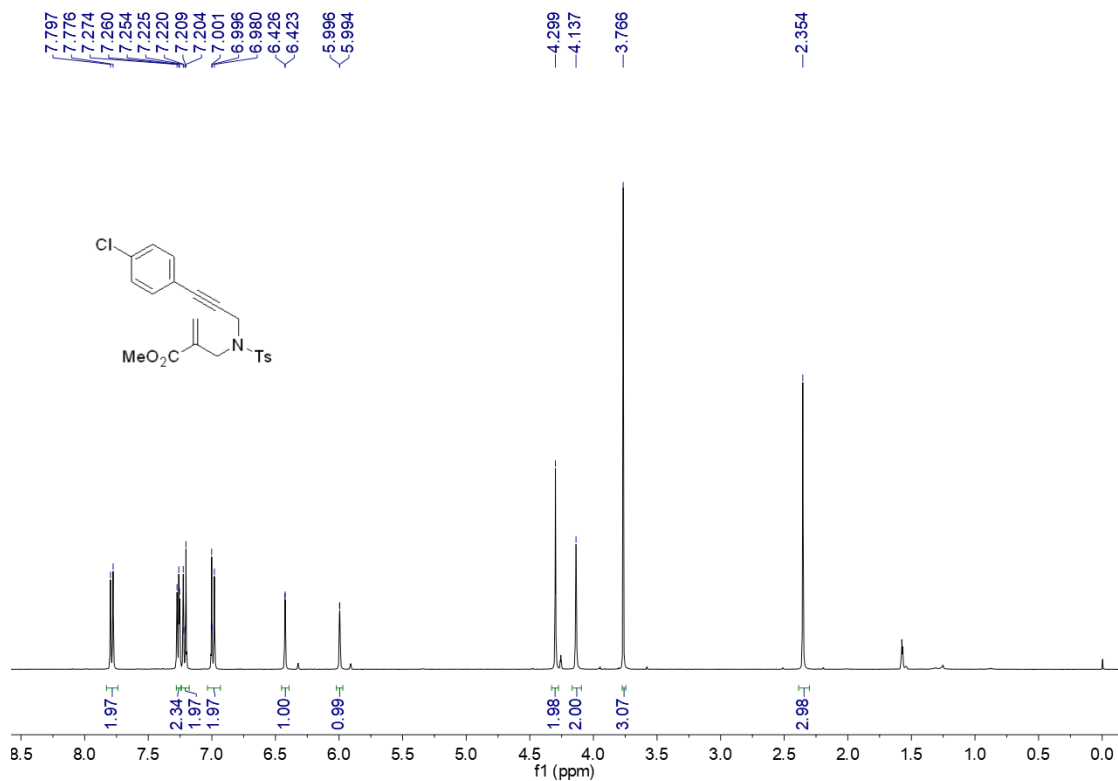

**<sup>13</sup>C NMR (CDCl<sub>3</sub>, 101 MHz)**

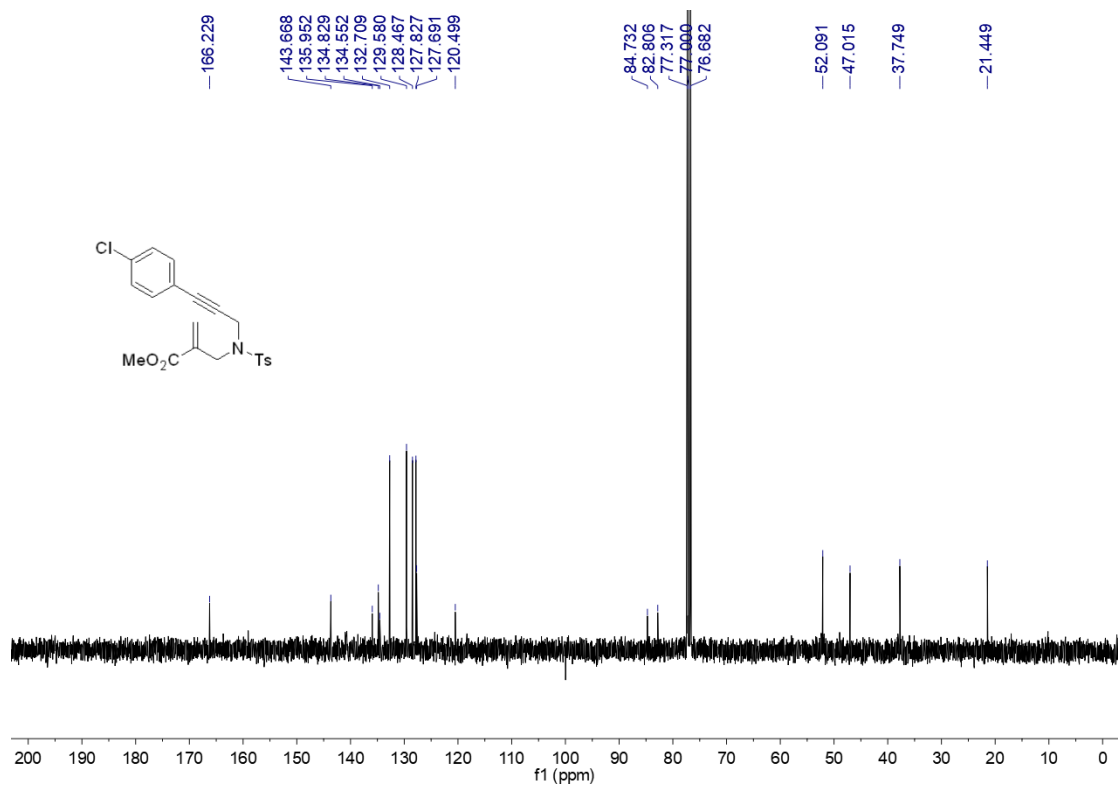

**(3k)**  
**<sup>1</sup>H NMR (CDCl<sub>3</sub>, 400 MHz)**

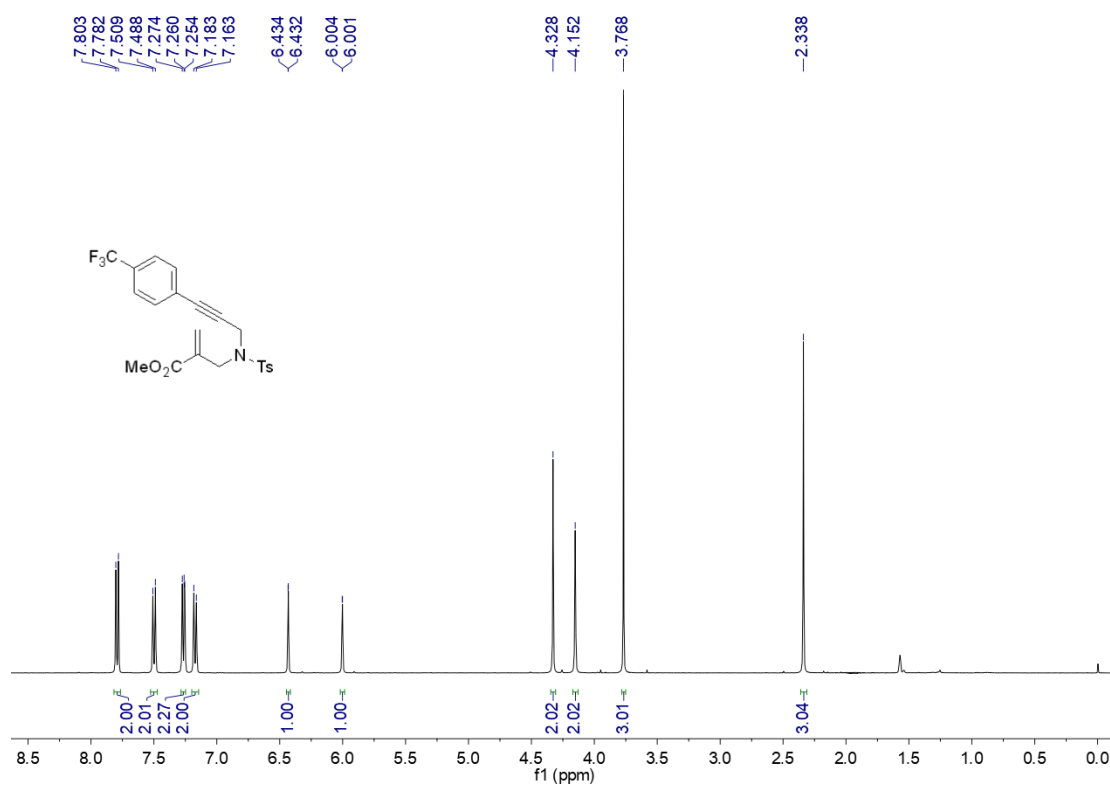

**<sup>13</sup>C NMR (CDCl<sub>3</sub>, 101 MHz)**

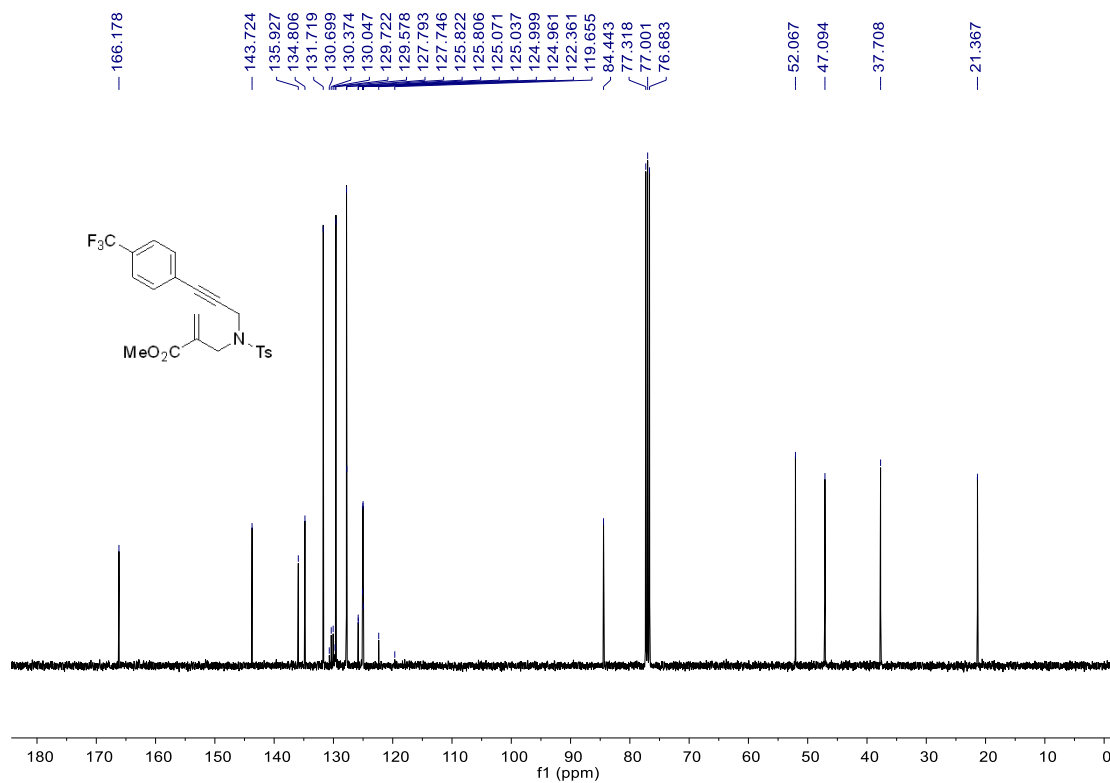

**<sup>19</sup>F NMR (CDCl<sub>3</sub>, 376 MHz)**

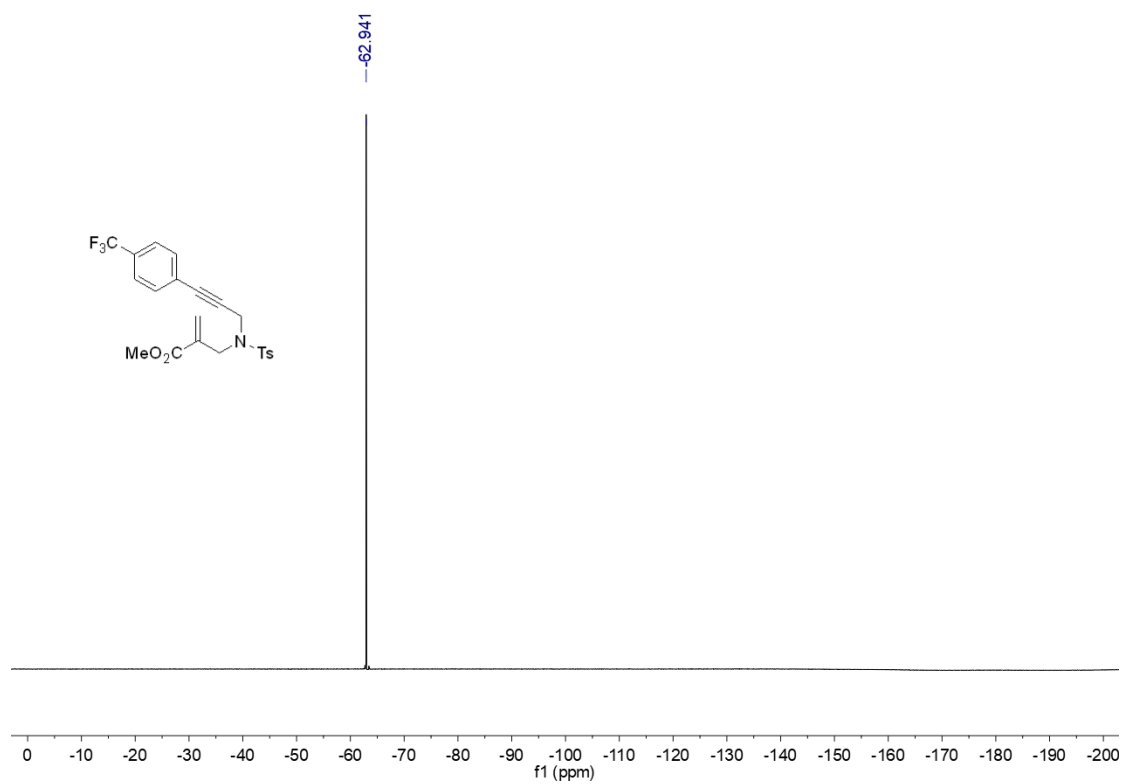

(31)  
<sup>1</sup>H NMR (CDCl<sub>3</sub>, 400 MHz)

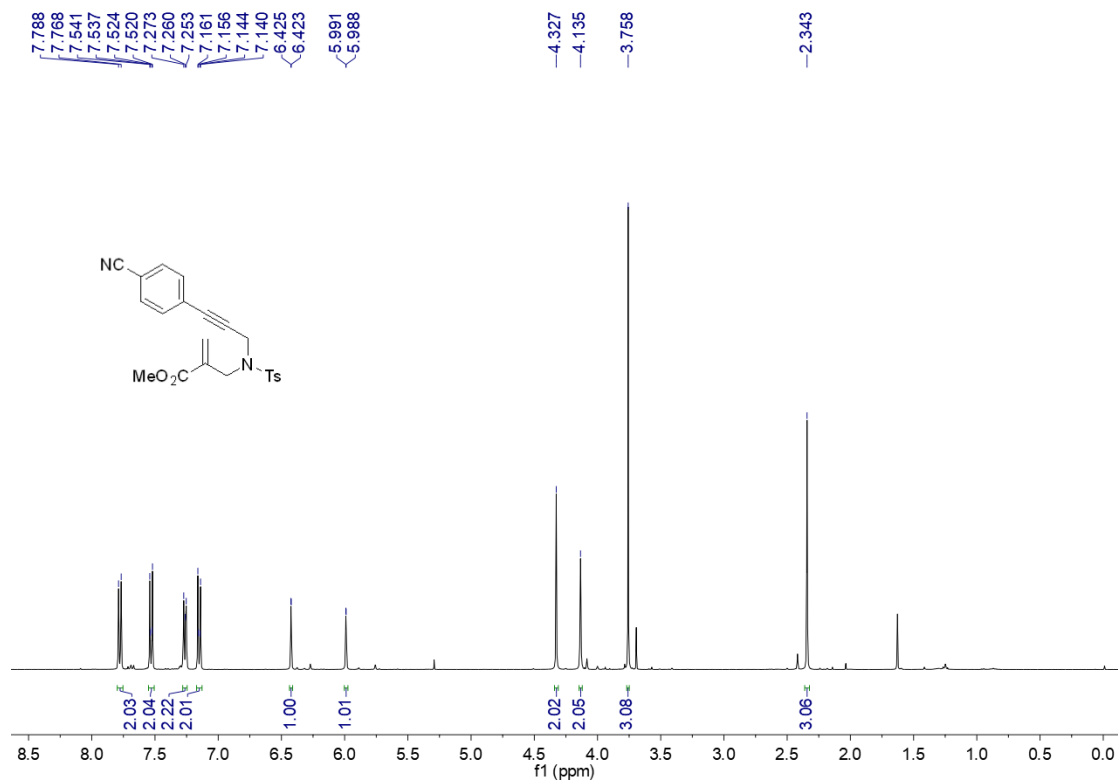

<sup>13</sup>C NMR (CDCl<sub>3</sub>, 101 MHz)

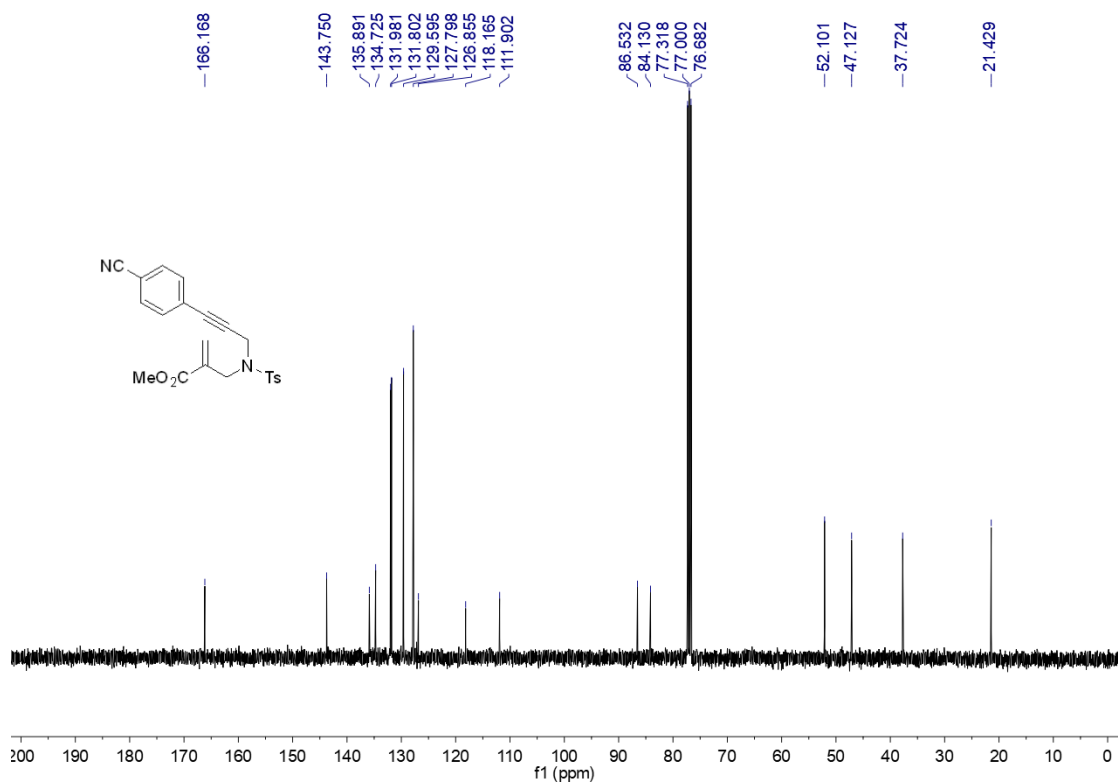

**(3m)**  
<sup>1</sup>H NMR (CDCl<sub>3</sub>, 400 MHz)

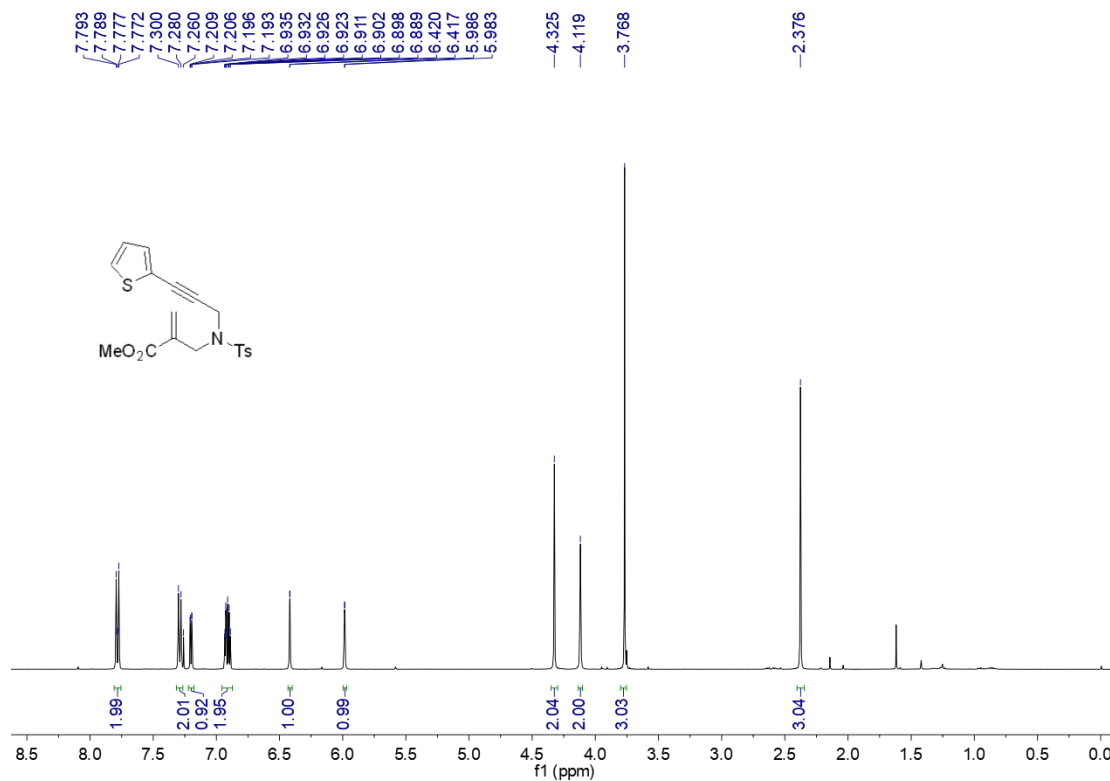

<sup>13</sup>C NMR (CDCl<sub>3</sub>, 101 MHz)

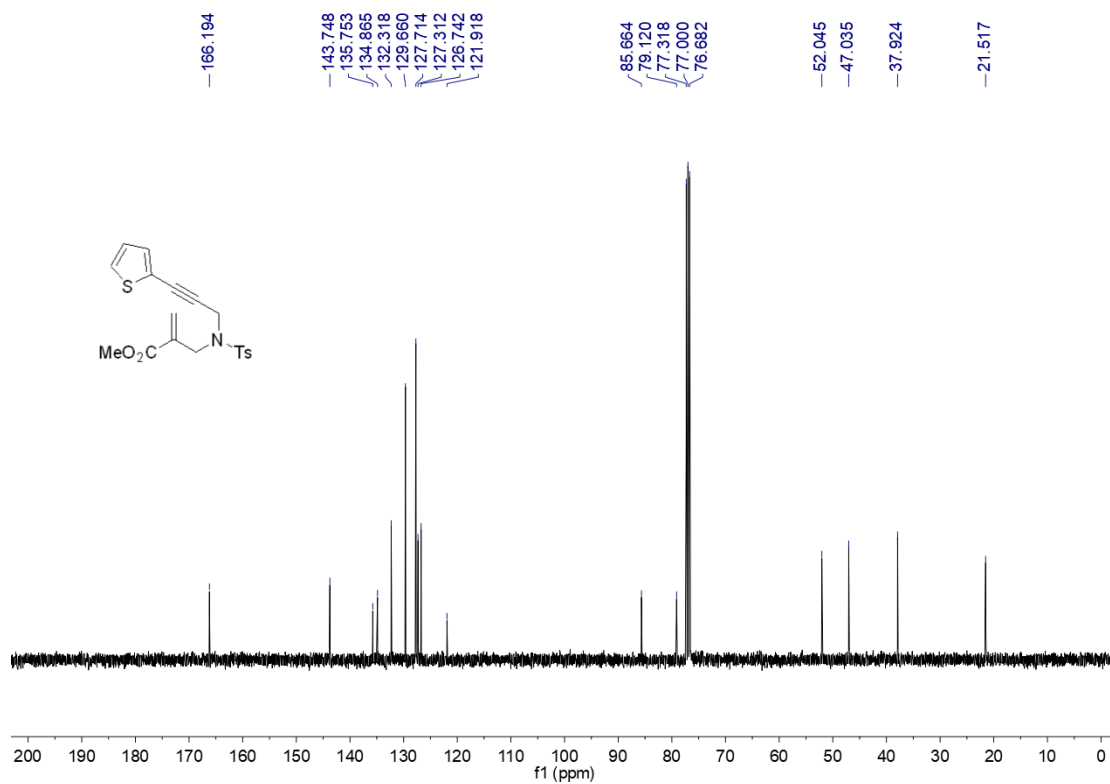

(3n)

$^1\text{H}$  NMR ( $\text{CDCl}_3$ , 400 MHz)

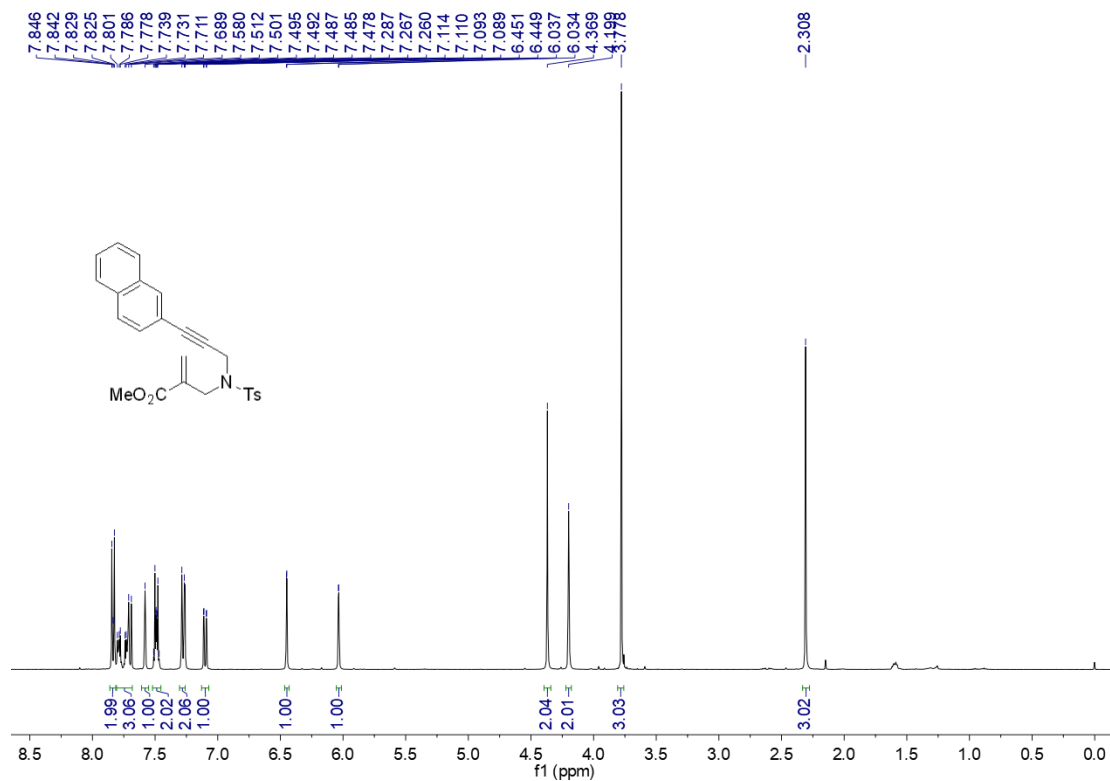

$^{13}\text{C}$  NMR ( $\text{CDCl}_3$ , 101 MHz)

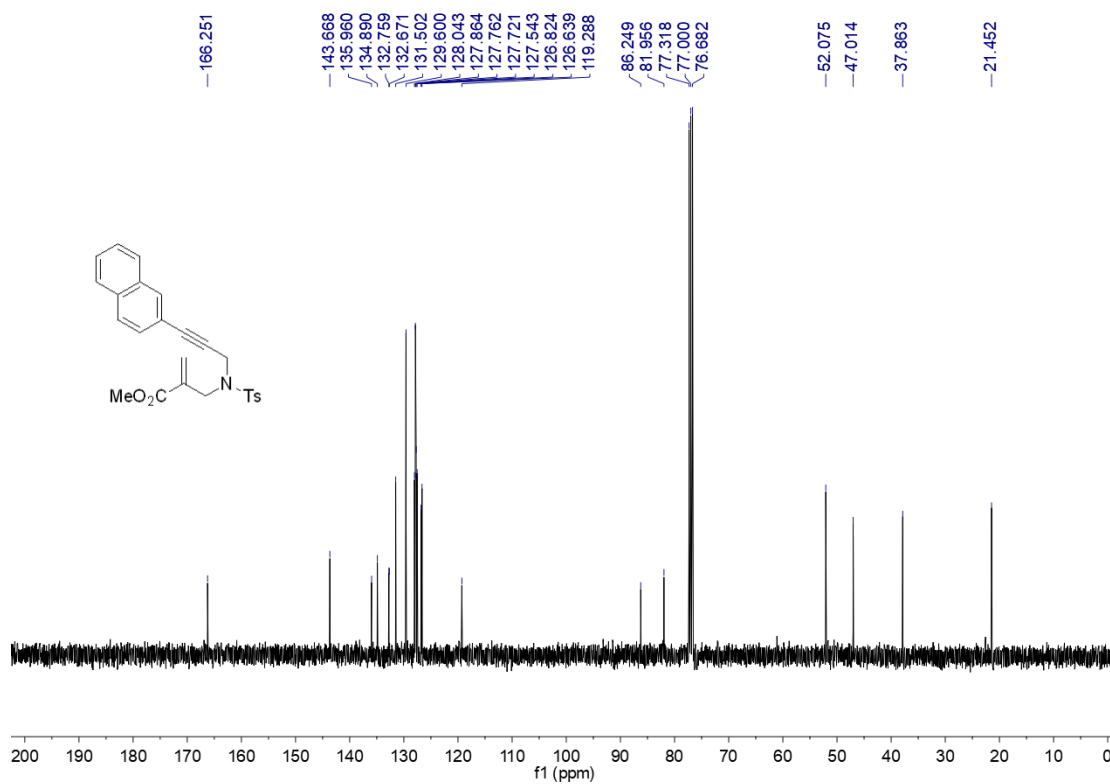

**(3p)**  
<sup>1</sup>H NMR (CDCl<sub>3</sub>, 400 MHz)

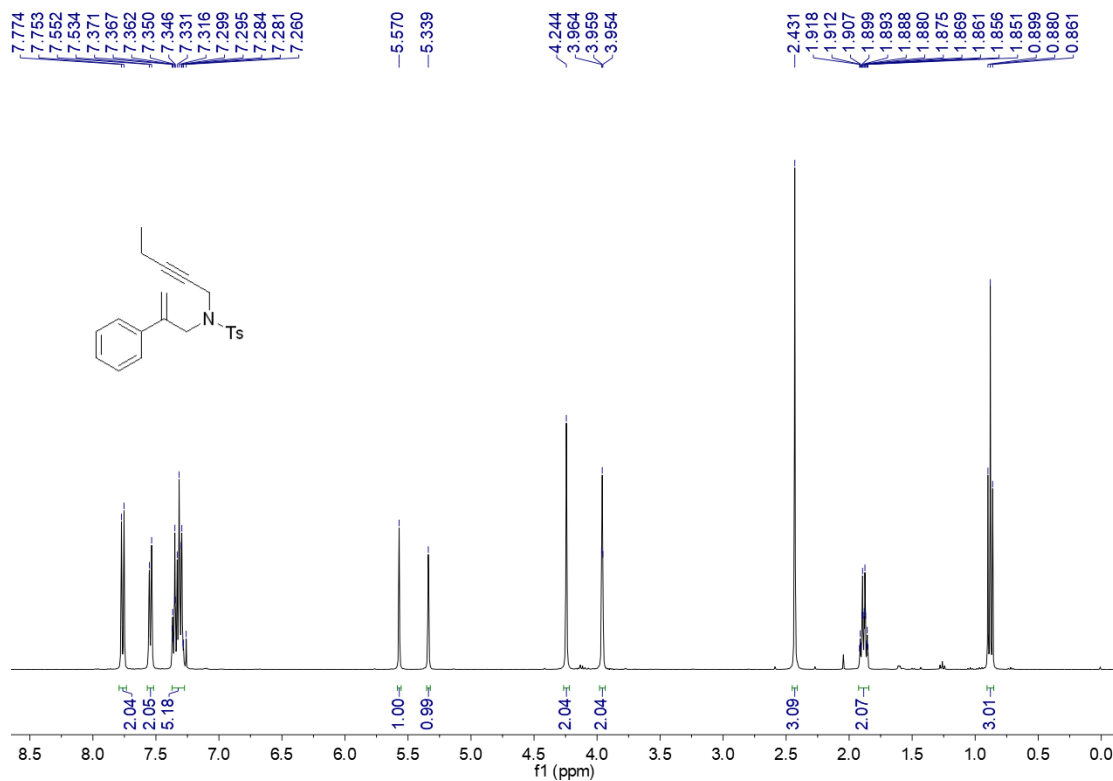

<sup>13</sup>C NMR (CDCl<sub>3</sub>, 101 MHz)

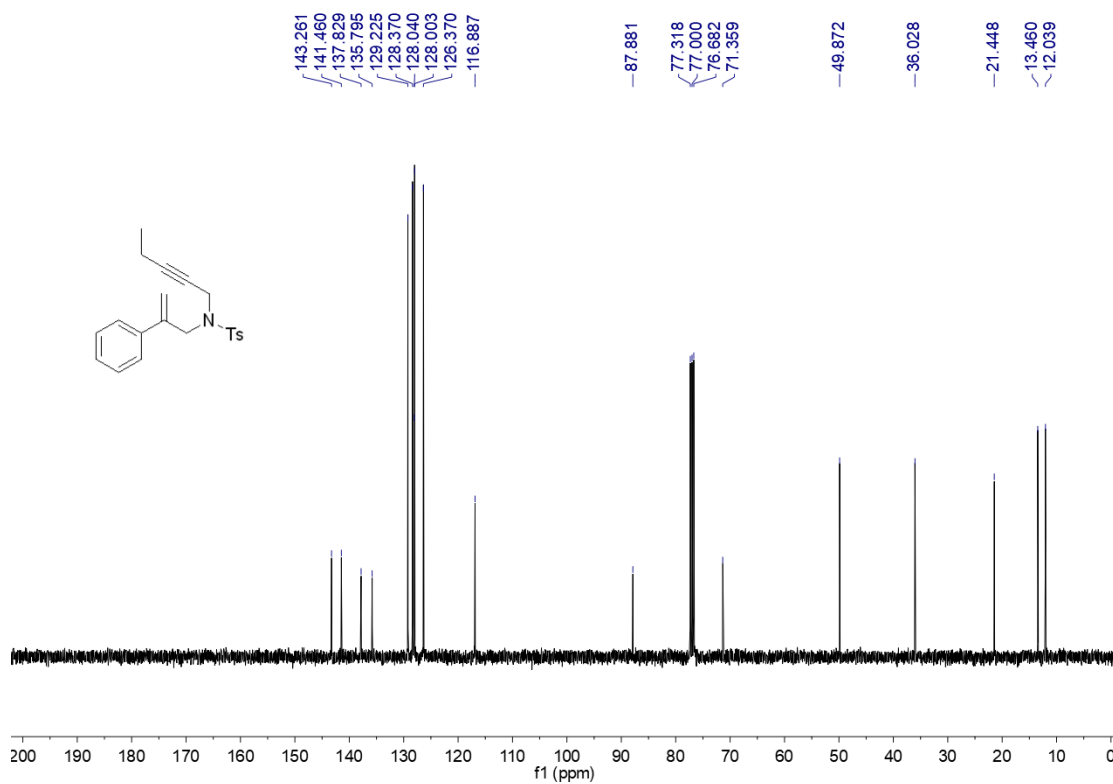



**(3u)**  
**<sup>1</sup>H NMR (CDCl<sub>3</sub>, 400 MHz)**

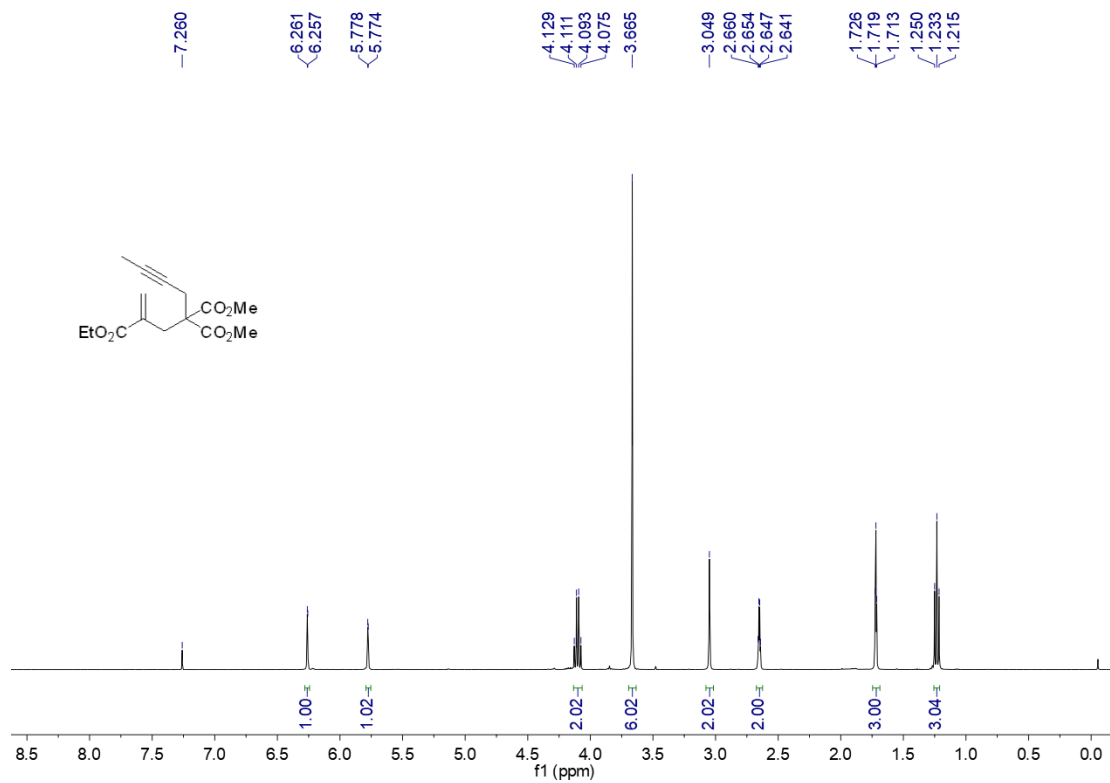

**<sup>13</sup>C NMR (CDCl<sub>3</sub>, 101 MHz)**

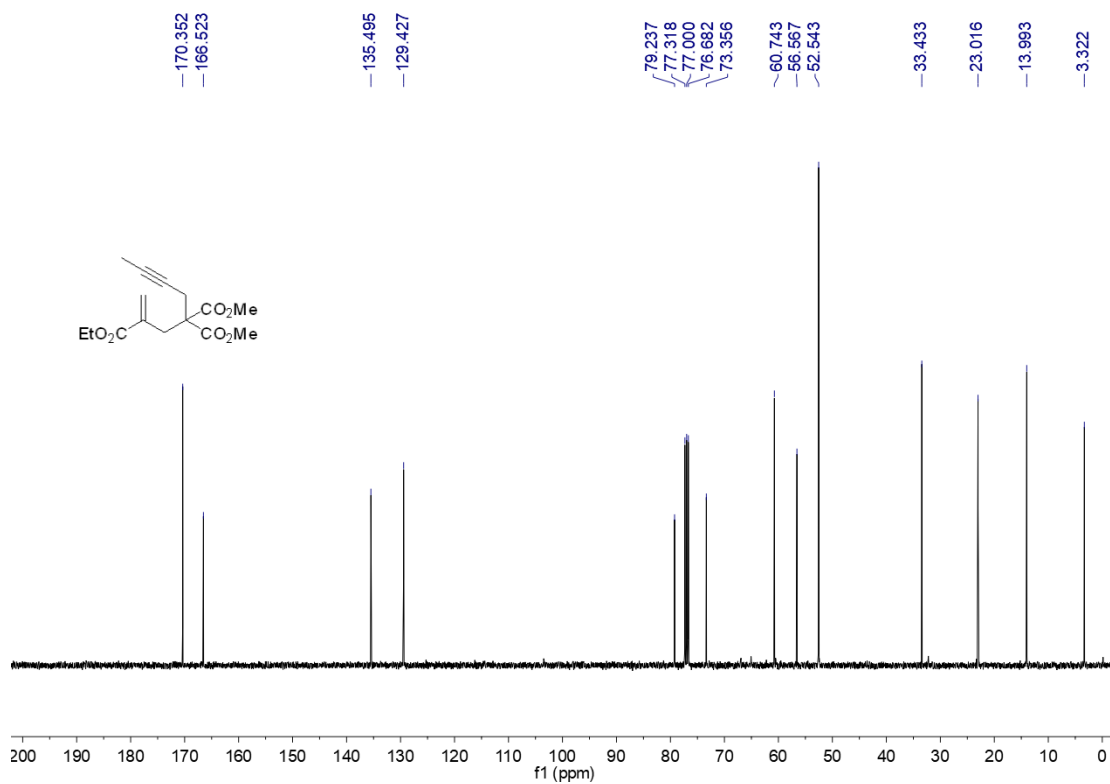

**(3v)**  
**<sup>1</sup>H NMR (CDCl<sub>3</sub>, 400 MHz)**

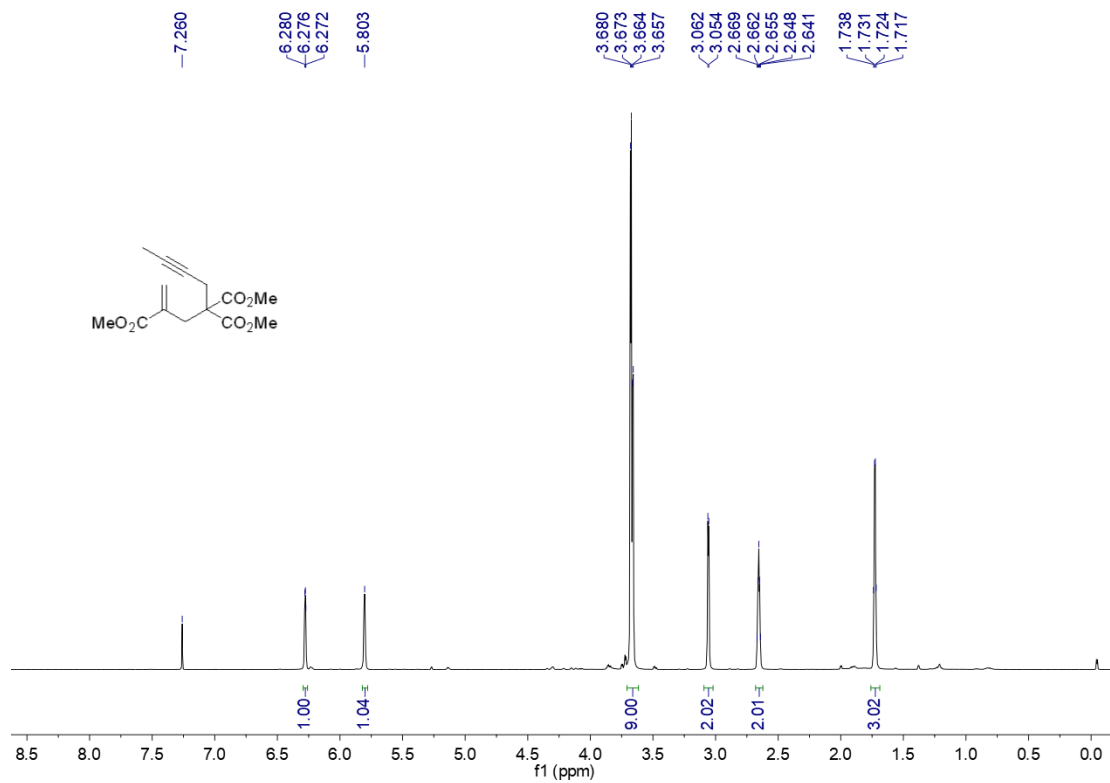

**<sup>13</sup>C NMR (CDCl<sub>3</sub>, 101 MHz)**

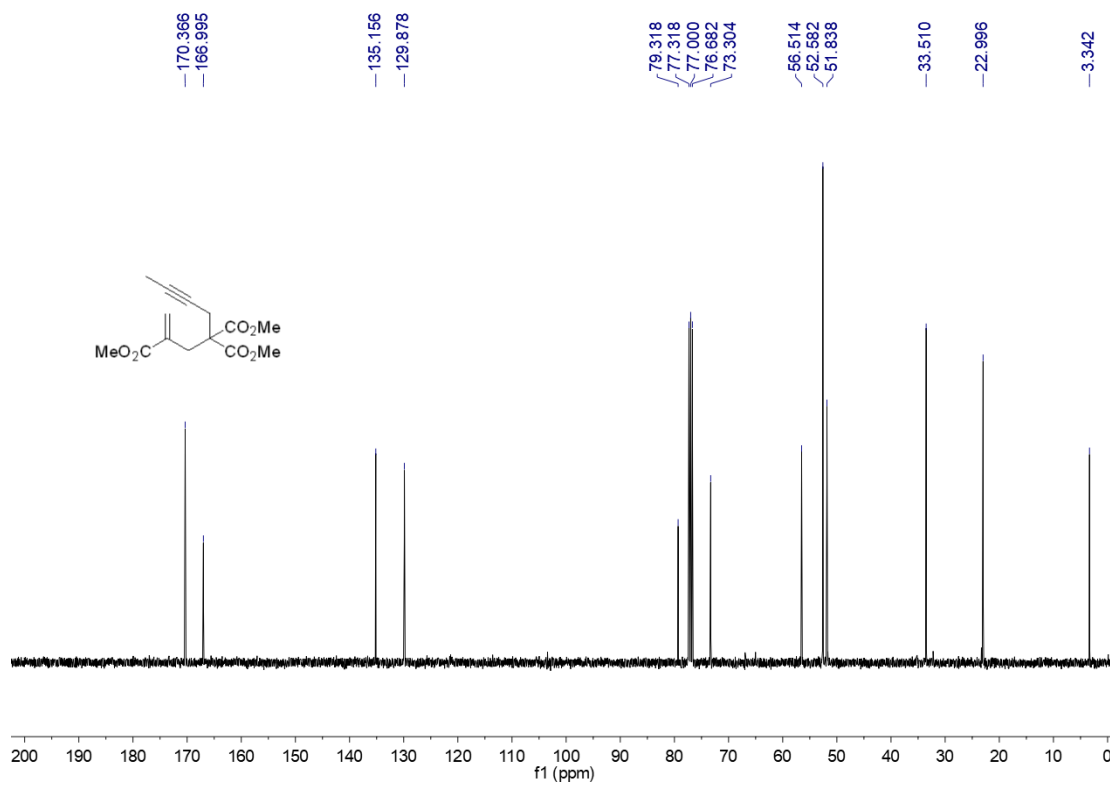

(3w)

<sup>1</sup>H NMR (CDCl<sub>3</sub>, 400 MHz)

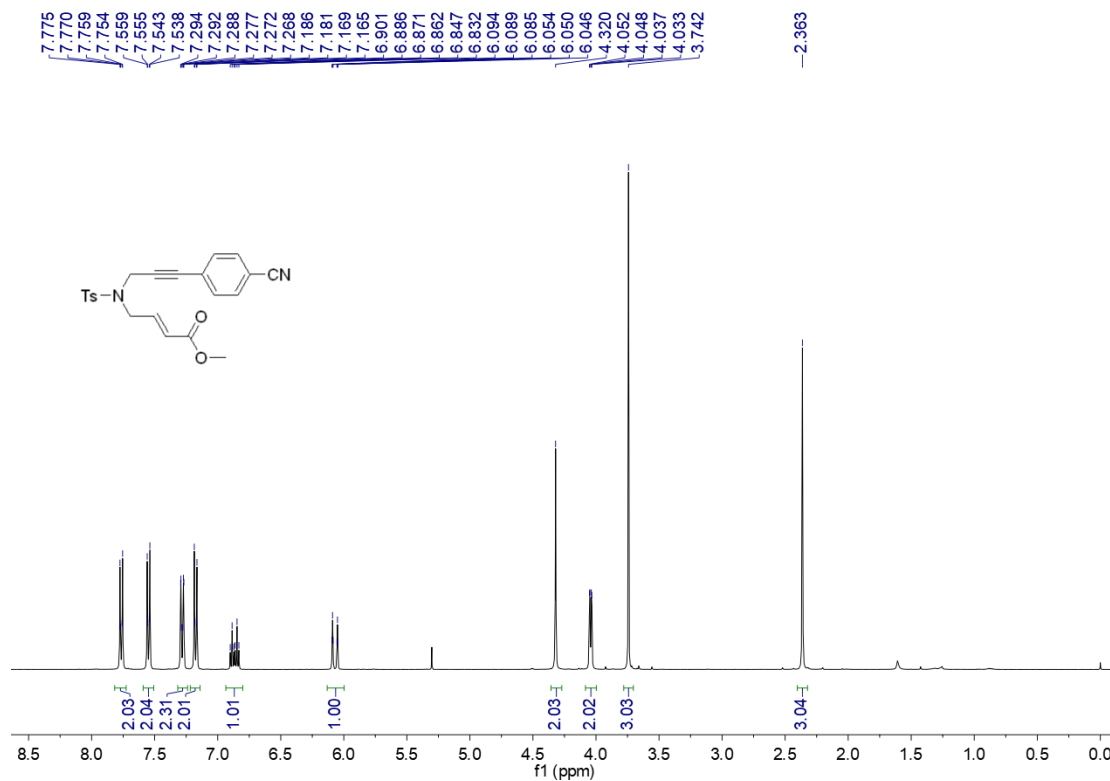

<sup>13</sup>C NMR (CDCl<sub>3</sub>, 101 MHz)

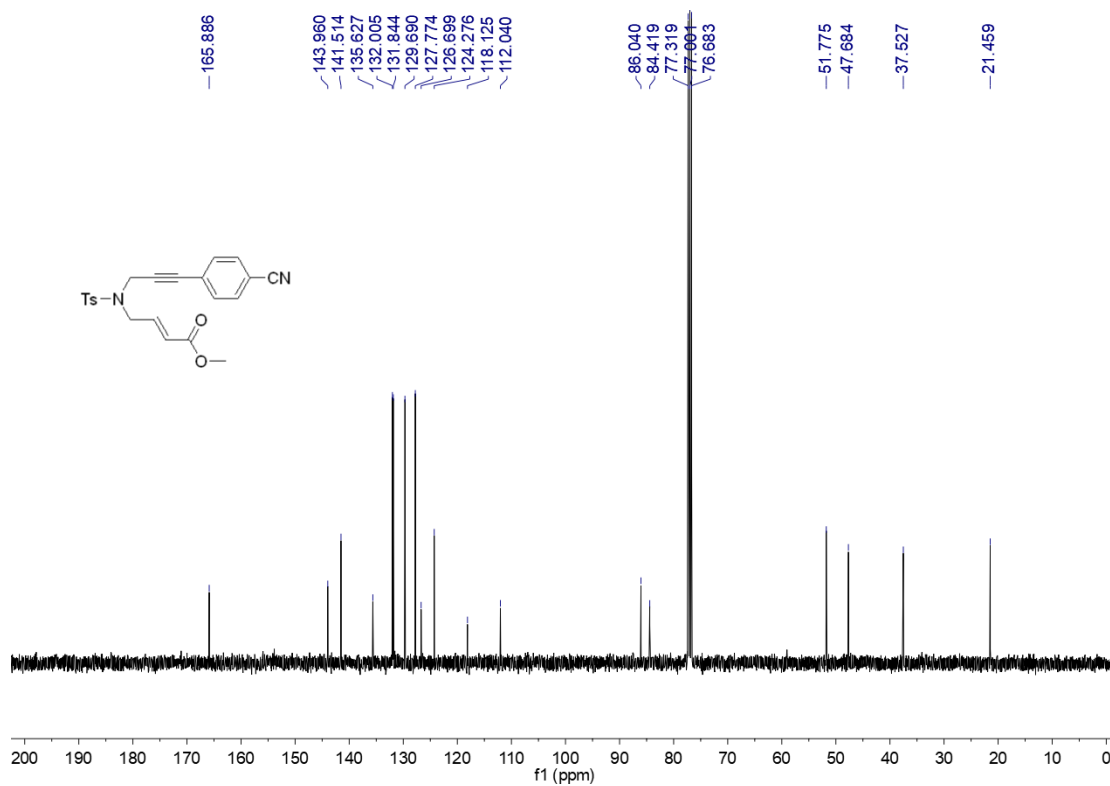

**PC2**  
**<sup>1</sup>H NMR (CDCl<sub>3</sub>, 400 MHz)**

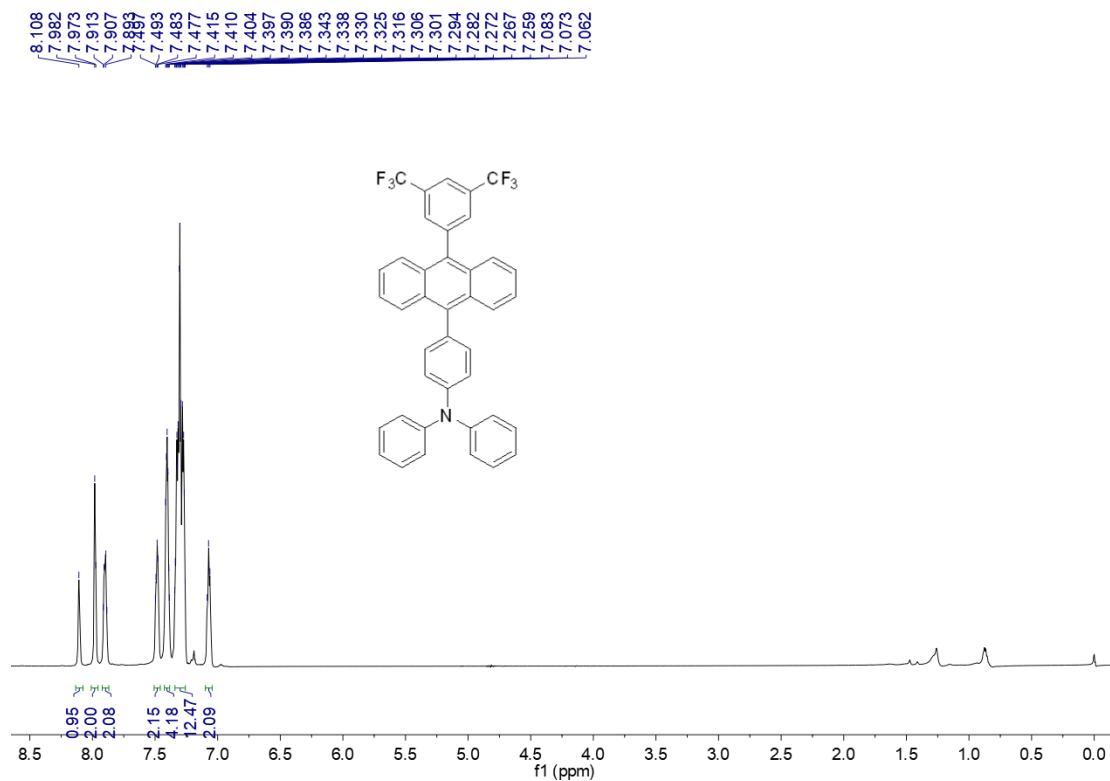

**<sup>13</sup>C NMR (CDCl<sub>3</sub>, 101 MHz)**

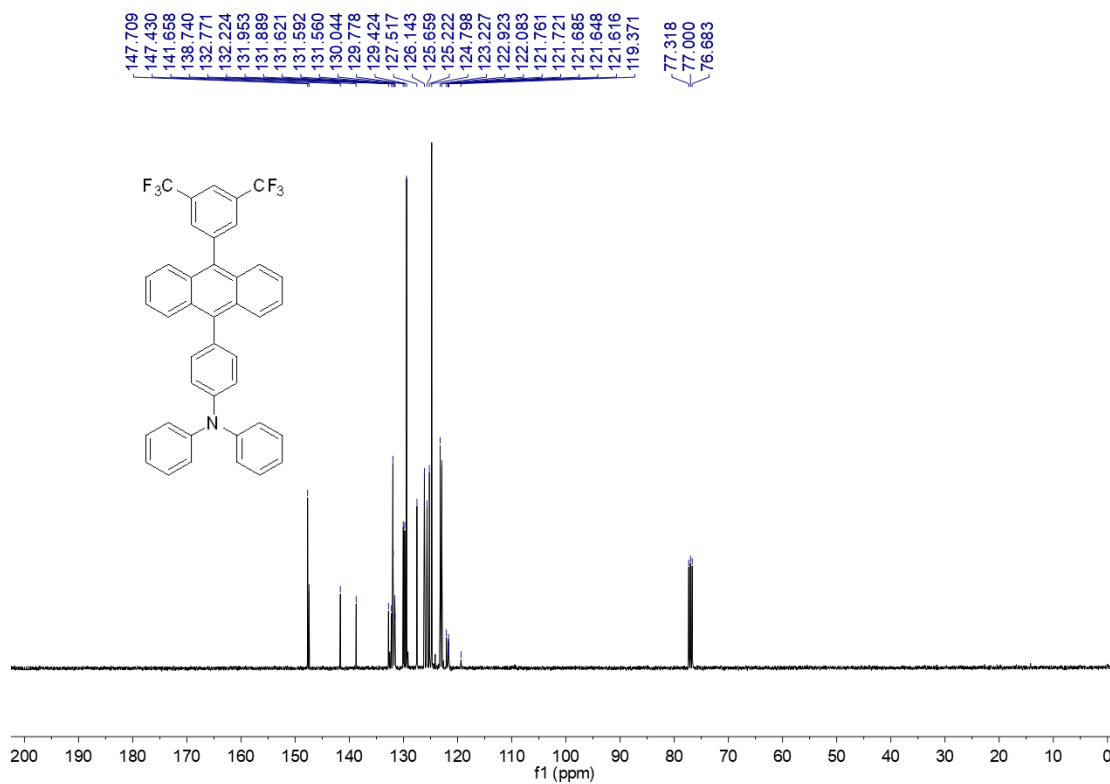

**$^{19}\text{F}$  NMR (CDCl<sub>3</sub>, 376 MHz)**

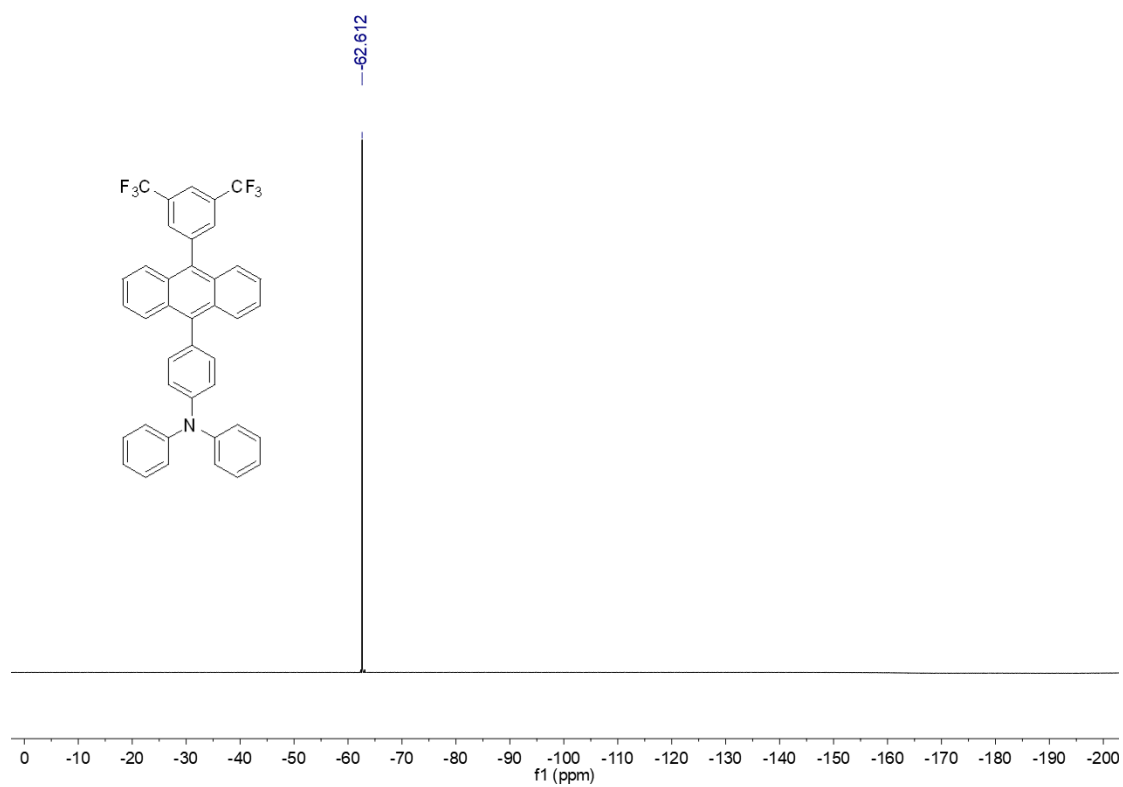

PC4  
<sup>1</sup>H NMR (CDCl<sub>3</sub>, 400 MHz)

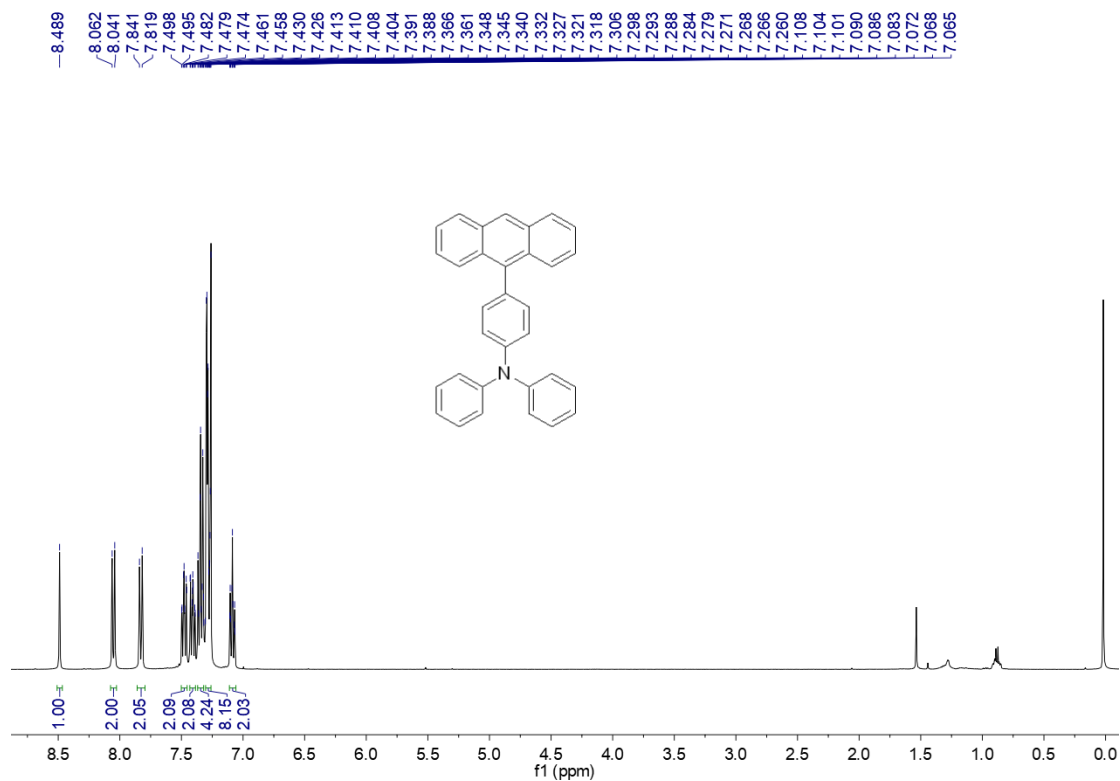

<sup>13</sup>C NMR (CDCl<sub>3</sub>, 101 MHz)

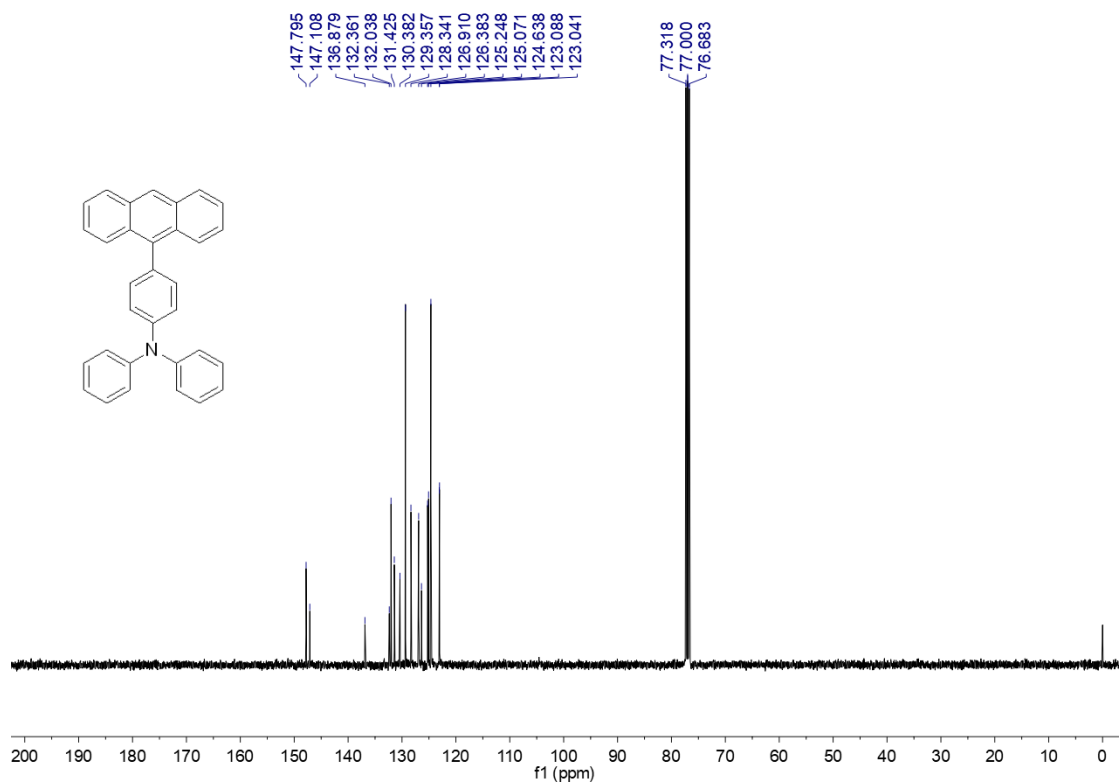

(2a)  
<sup>1</sup>H NMR (CDCl<sub>3</sub>, 400 MHz)

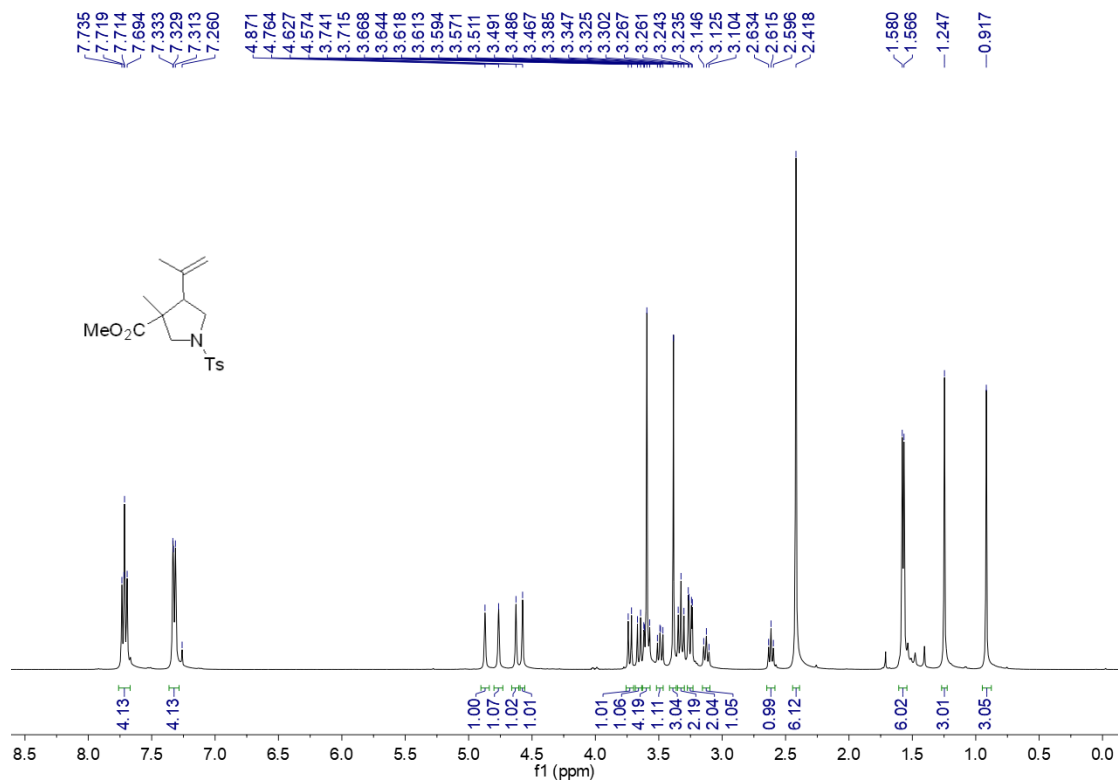

<sup>13</sup>C NMR (CDCl<sub>3</sub>, 101 MHz)

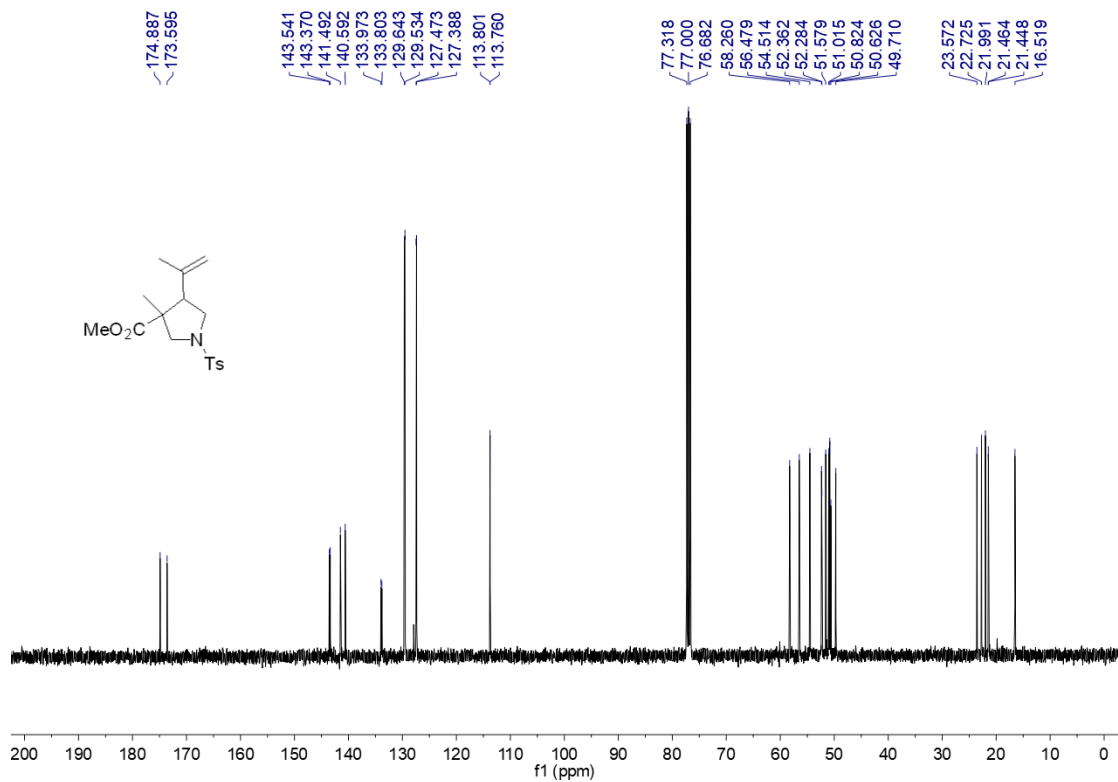

(2b)  
<sup>1</sup>H NMR (CDCl<sub>3</sub>, 400 MHz)

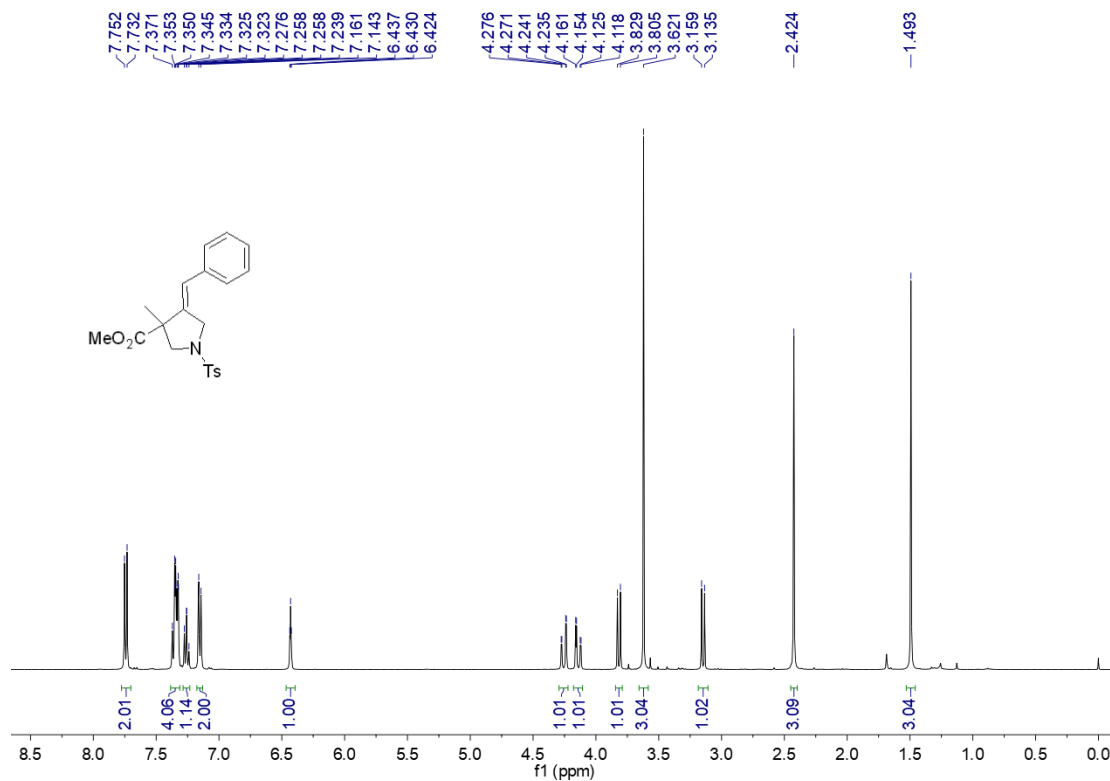

<sup>13</sup>C NMR (CDCl<sub>3</sub>, 101 MHz)

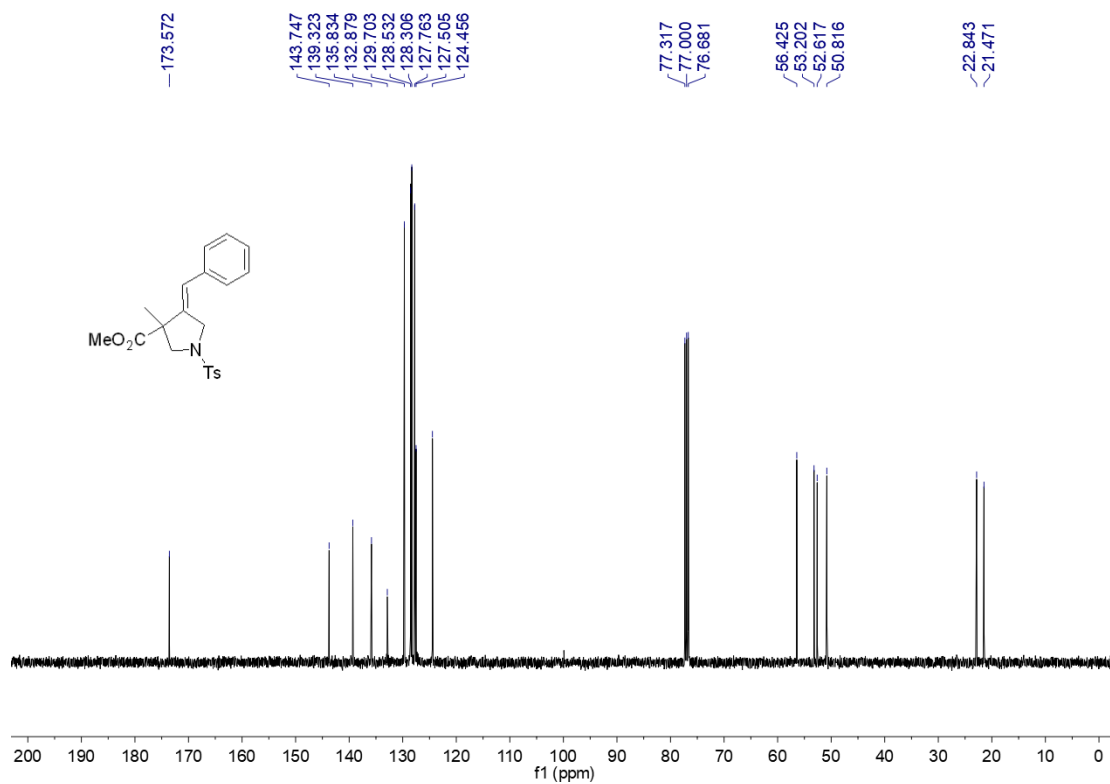



(2c)  
<sup>1</sup>H NMR (CDCl<sub>3</sub>, 400 MHz)

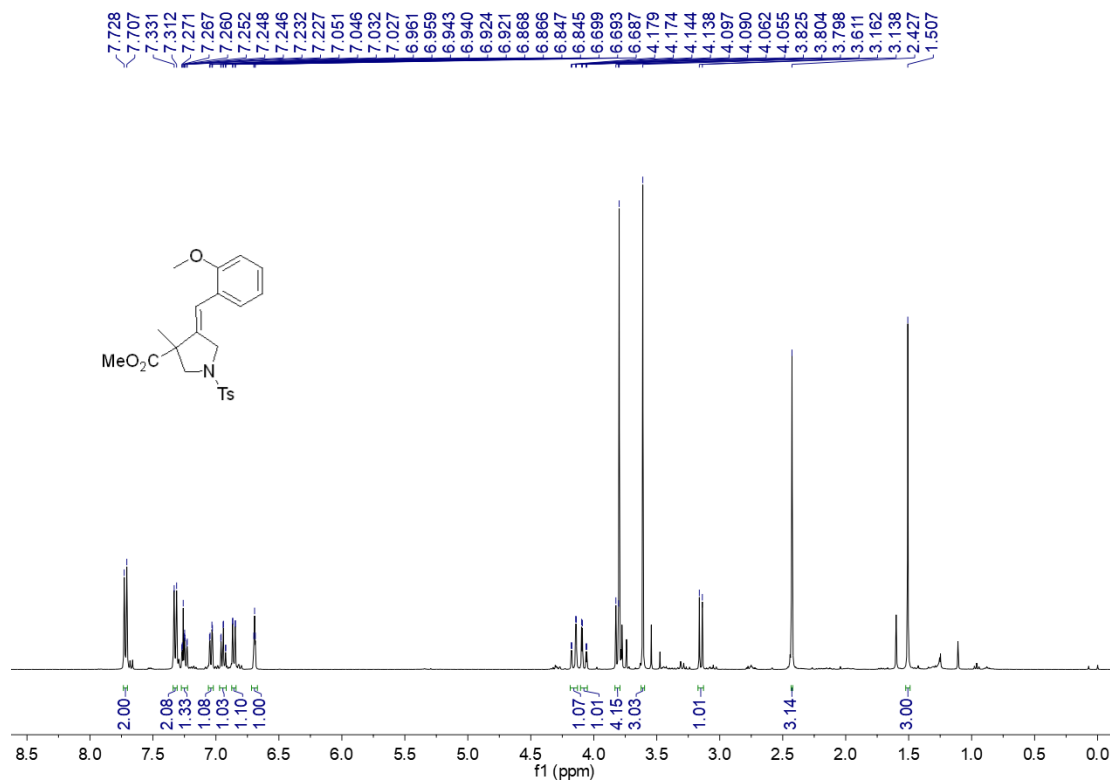

<sup>13</sup>C NMR (CDCl<sub>3</sub>, 101 MHz)

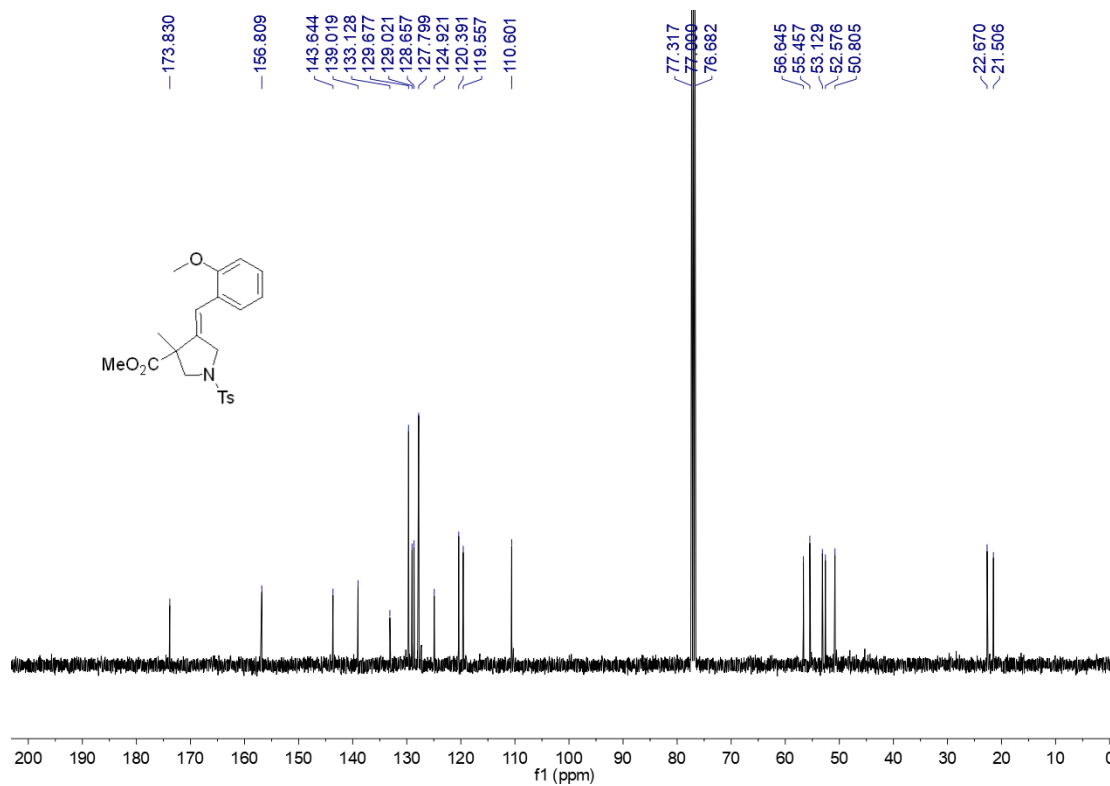

(2d)  
<sup>1</sup>H NMR (CDCl<sub>3</sub>, 400 MHz)

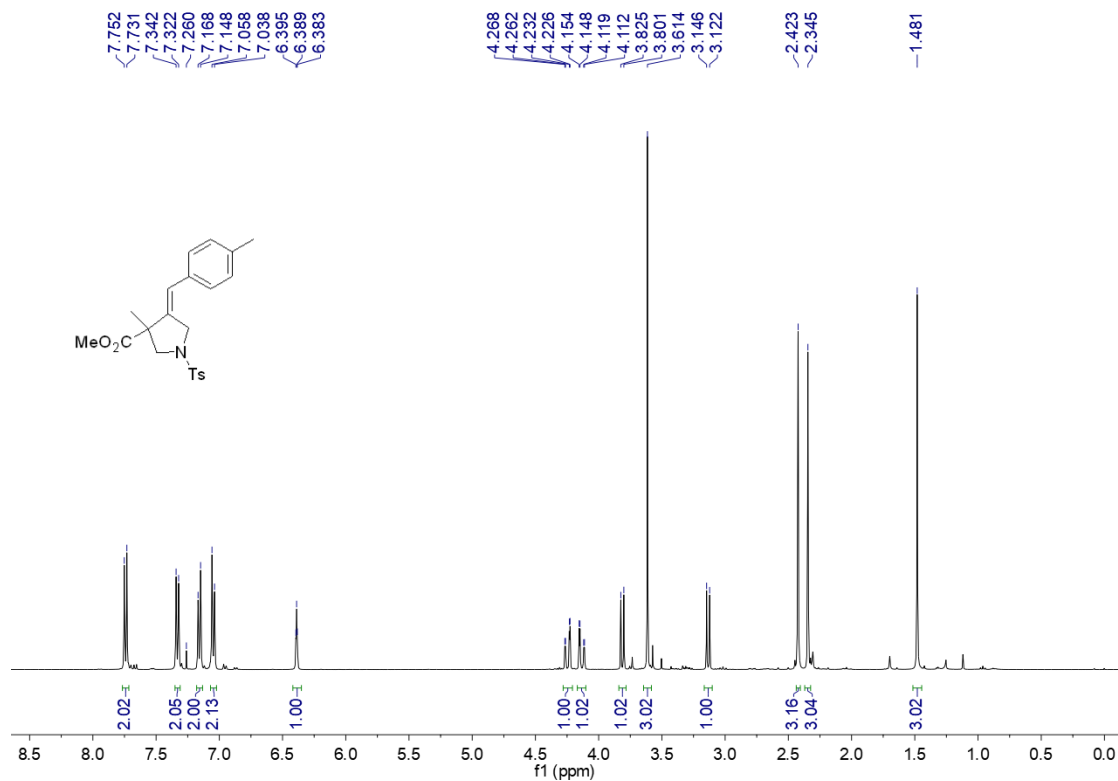

<sup>13</sup>C NMR (CDCl<sub>3</sub>, 101 MHz)

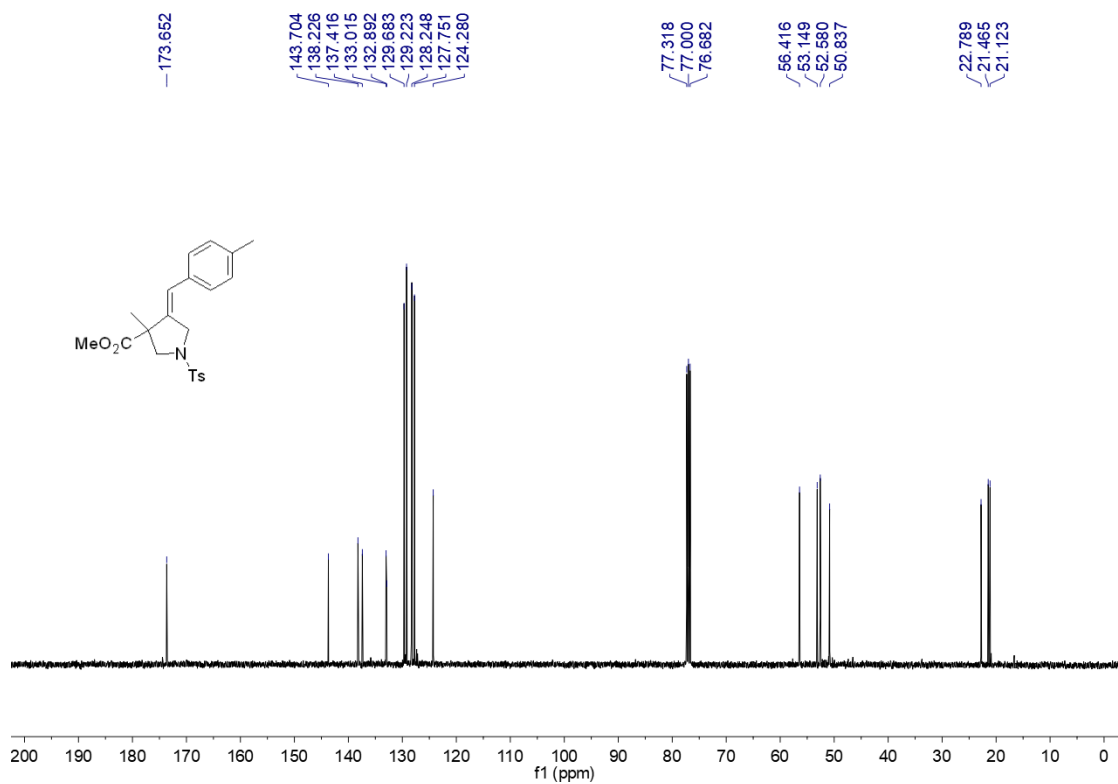

(2e)

$^1\text{H}$  NMR ( $\text{CDCl}_3$ , 400 MHz)

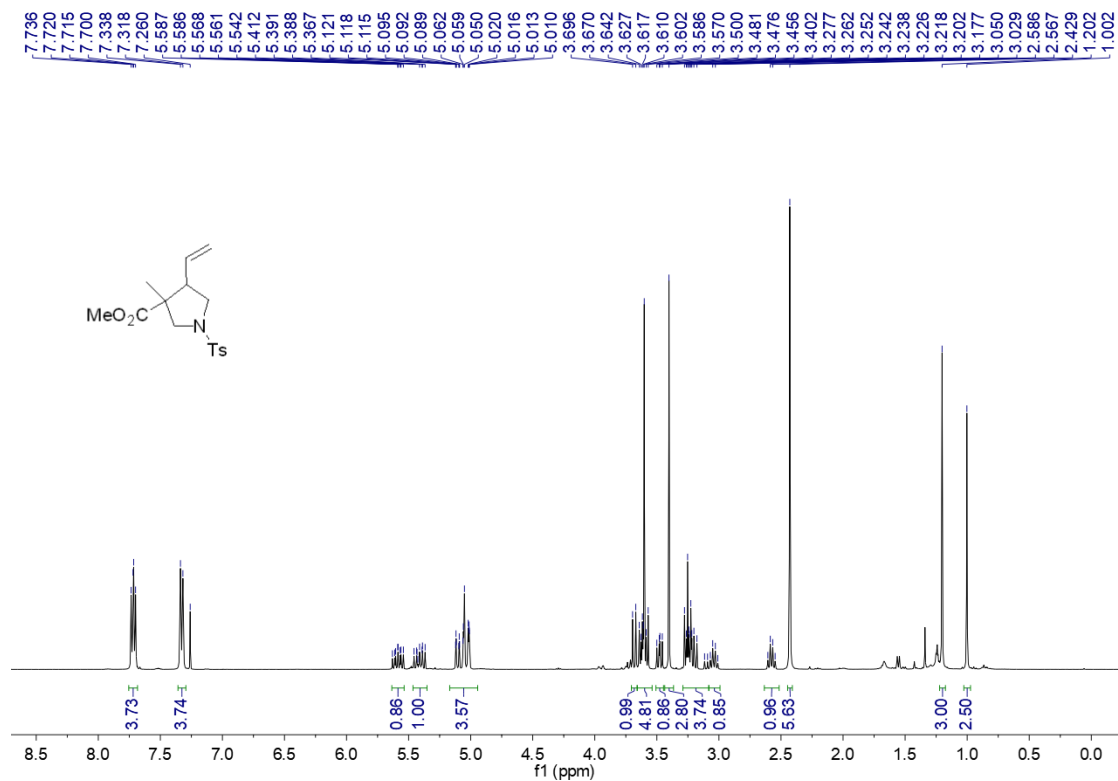

$^{13}\text{C}$  NMR ( $\text{CDCl}_3$ , 101 MHz)

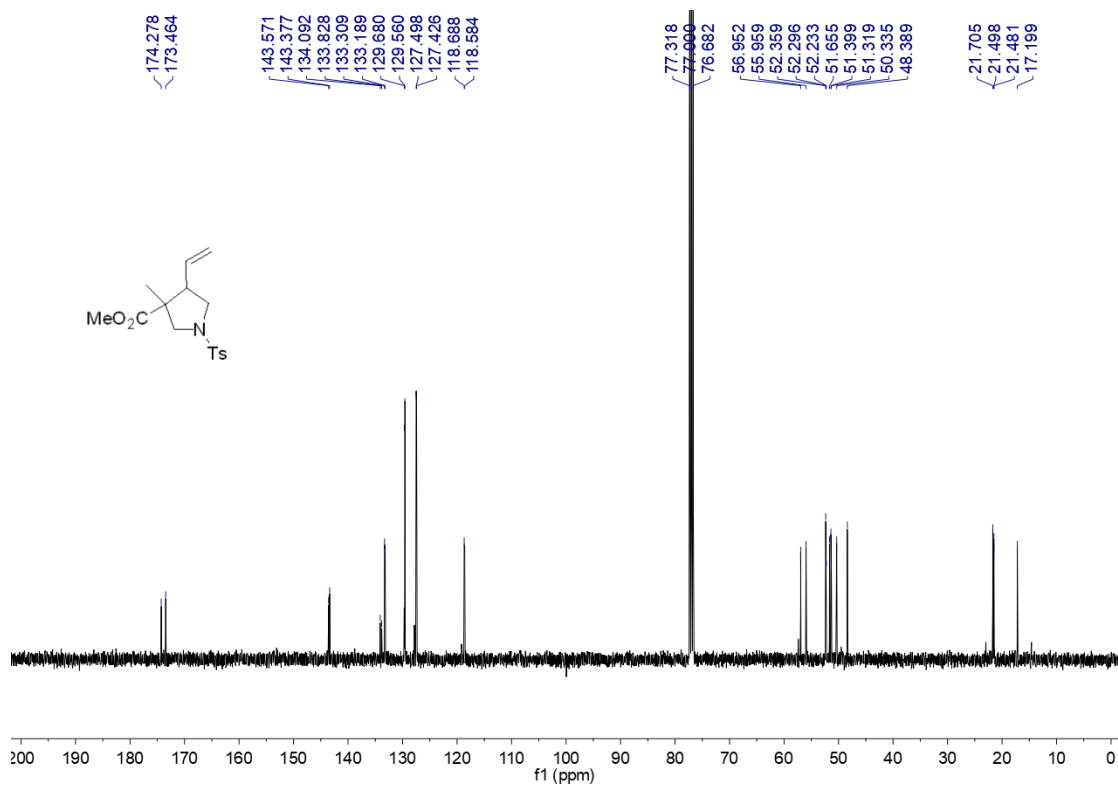

(2f)

<sup>1</sup>H NMR (CDCl<sub>3</sub>, 400 MHz)

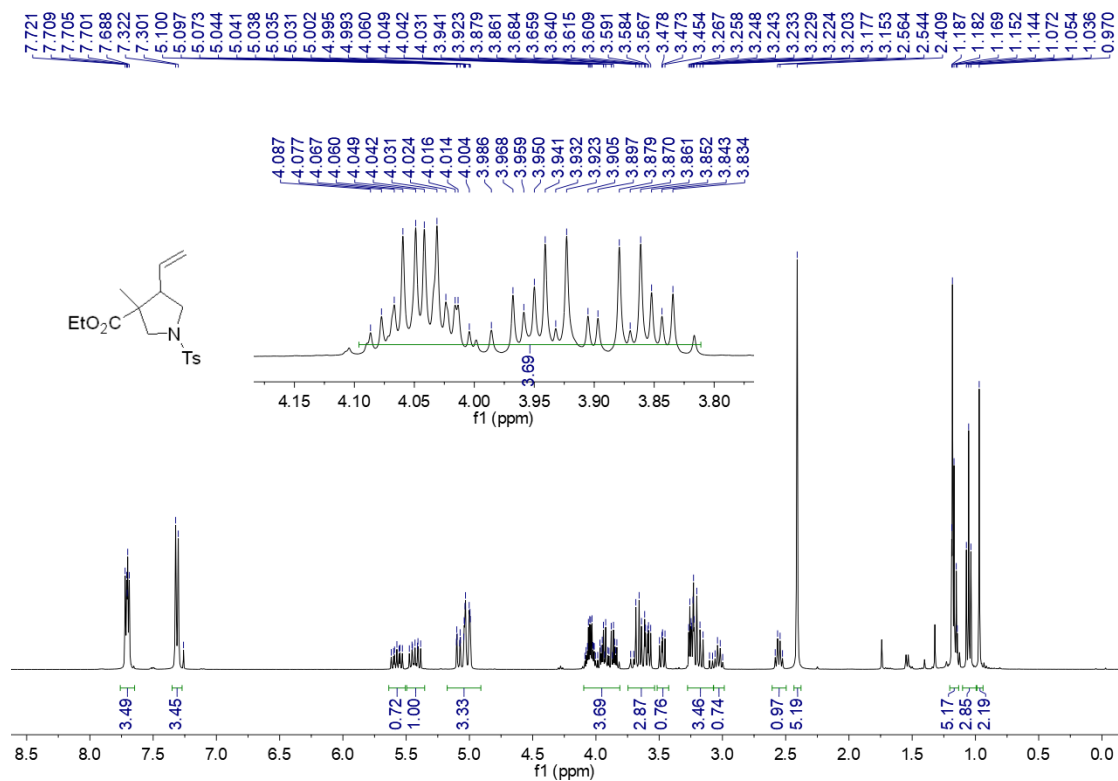

<sup>13</sup>C NMR (CDCl<sub>3</sub>, 101 MHz)

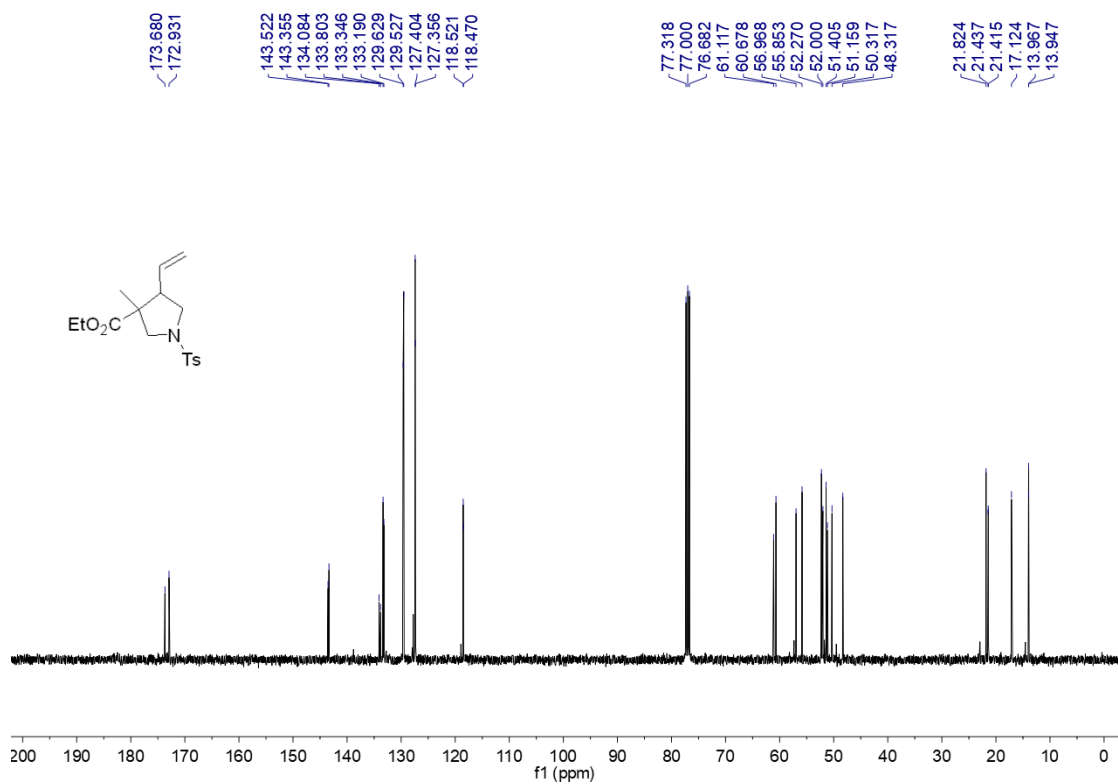

(2g)

<sup>1</sup>H NMR (CDCl<sub>3</sub>, 400 MHz)

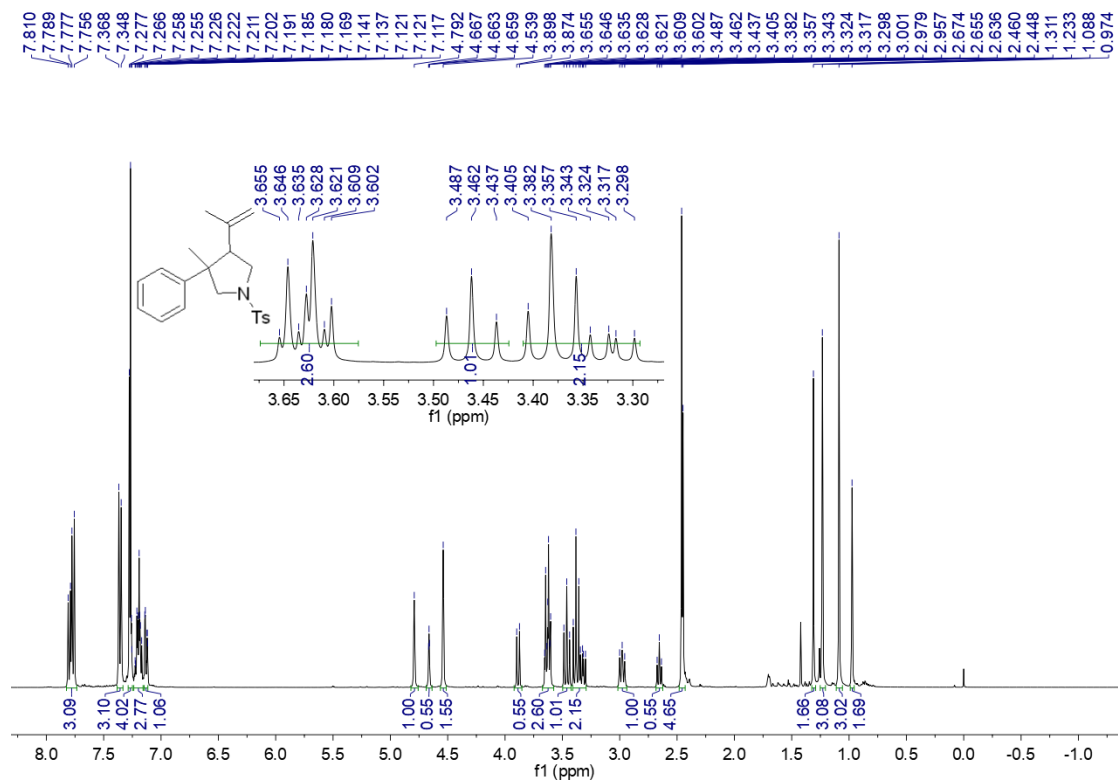

<sup>13</sup>C NMR (CDCl<sub>3</sub>, 101 MHz)

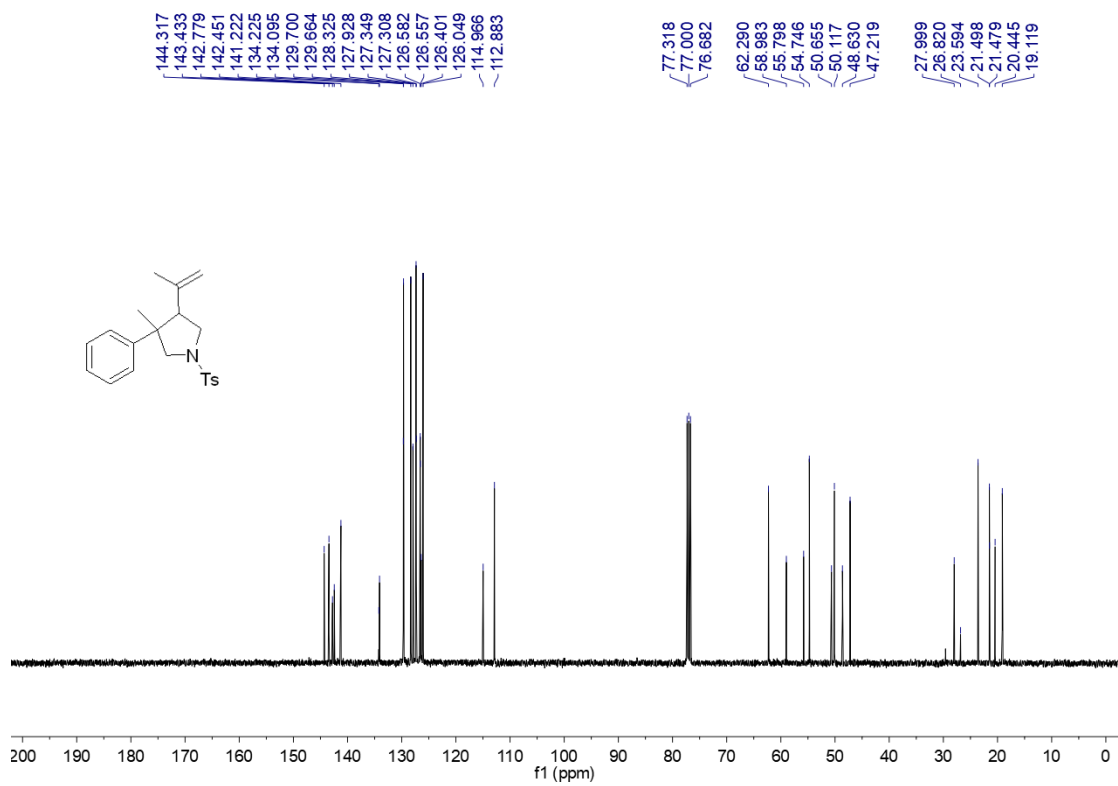

**(2h)**  
<sup>1</sup>H NMR (CDCl<sub>3</sub>, 400 MHz)

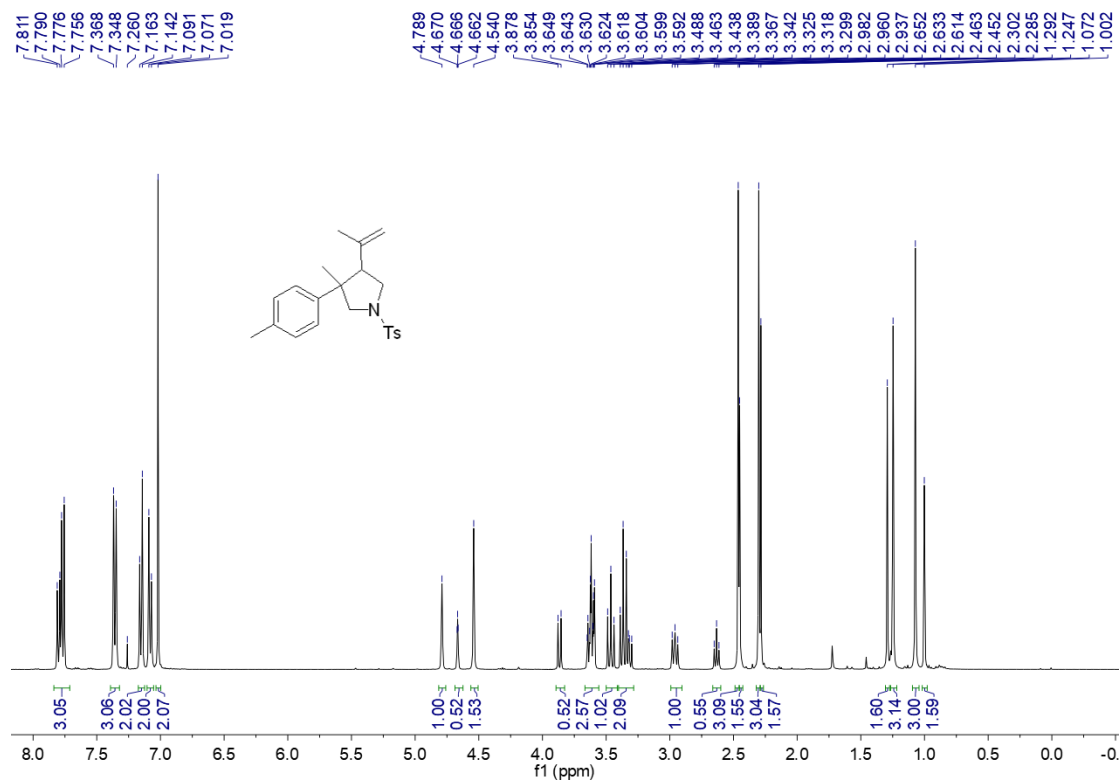

<sup>13</sup>C NMR (CDCl<sub>3</sub>, 101 MHz)

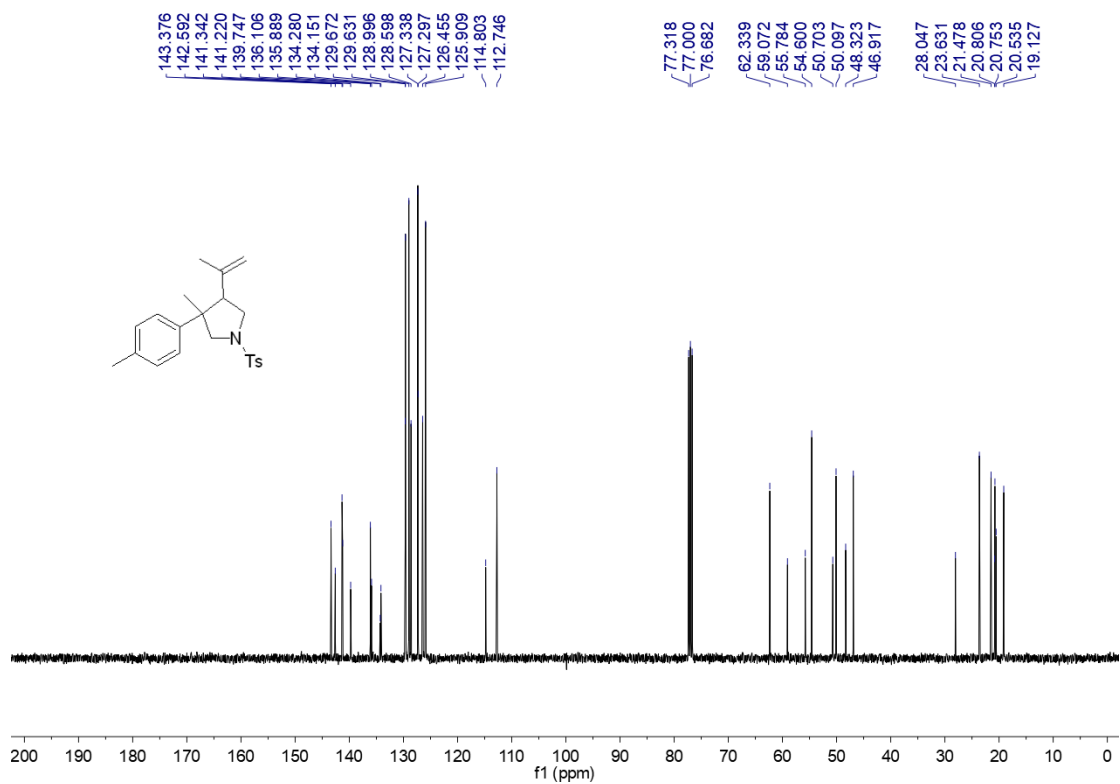

(2i)

<sup>1</sup>H NMR (CDCl<sub>3</sub>, 400 MHz)

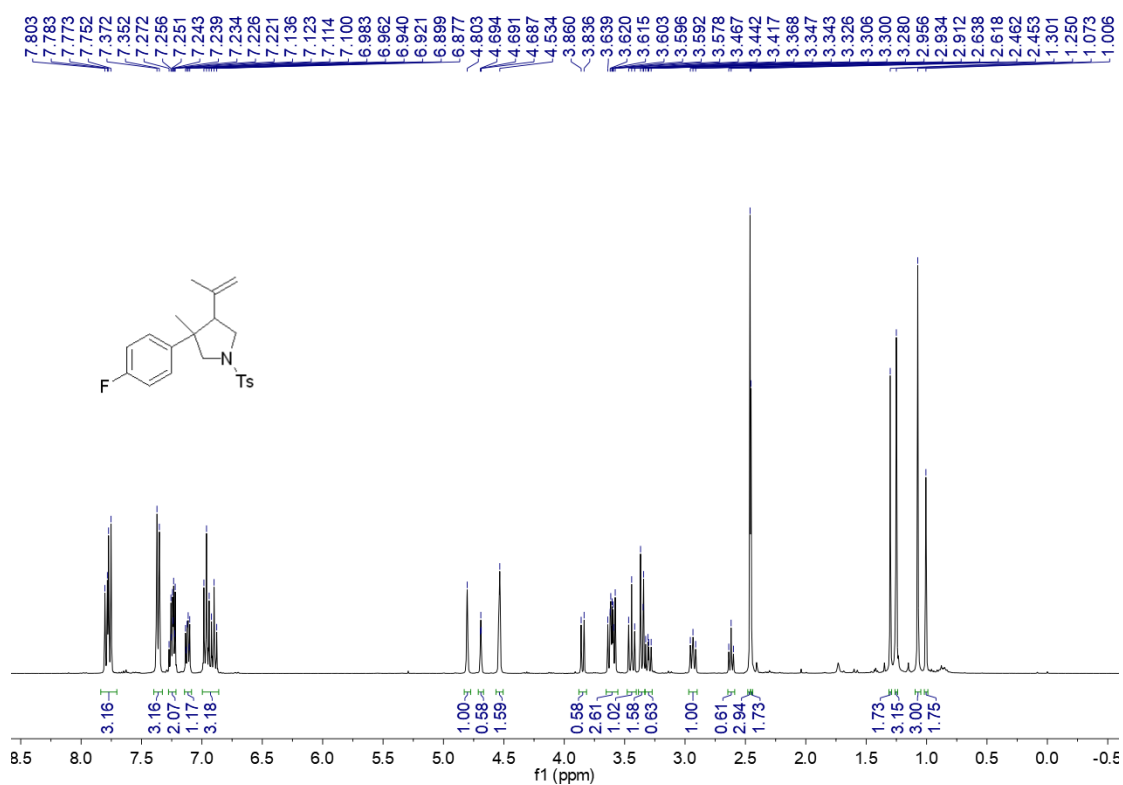

<sup>13</sup>C NMR (CDCl<sub>3</sub>, 101 MHz)

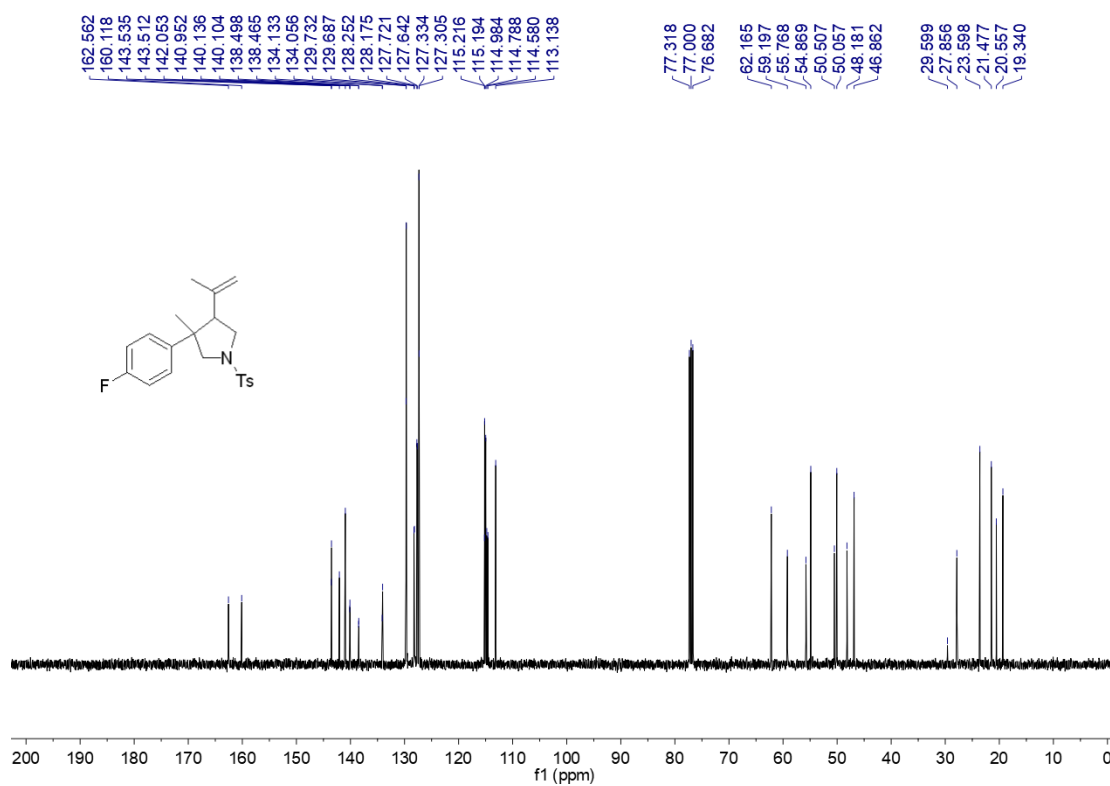

**$^{19}\text{F}$  NMR (CDCl<sub>3</sub>, 376 MHz)**

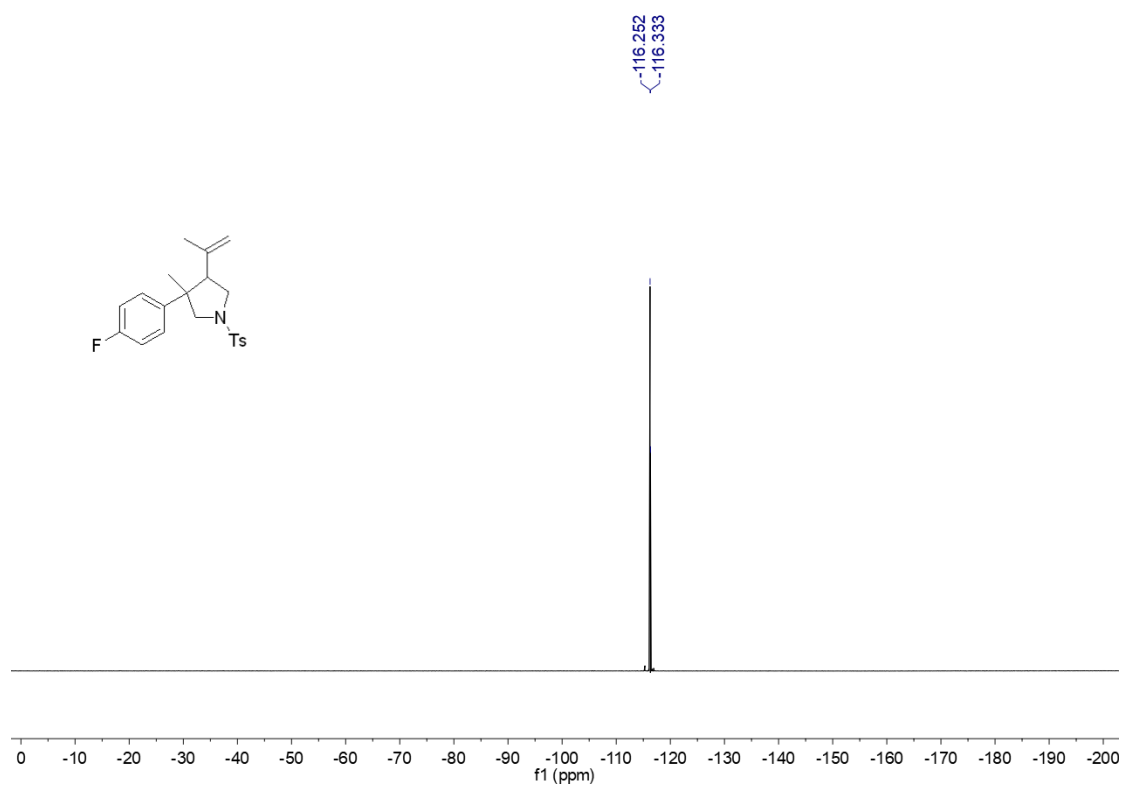



**(2j)**  
<sup>1</sup>H NMR (CDCl<sub>3</sub>, 400 MHz)

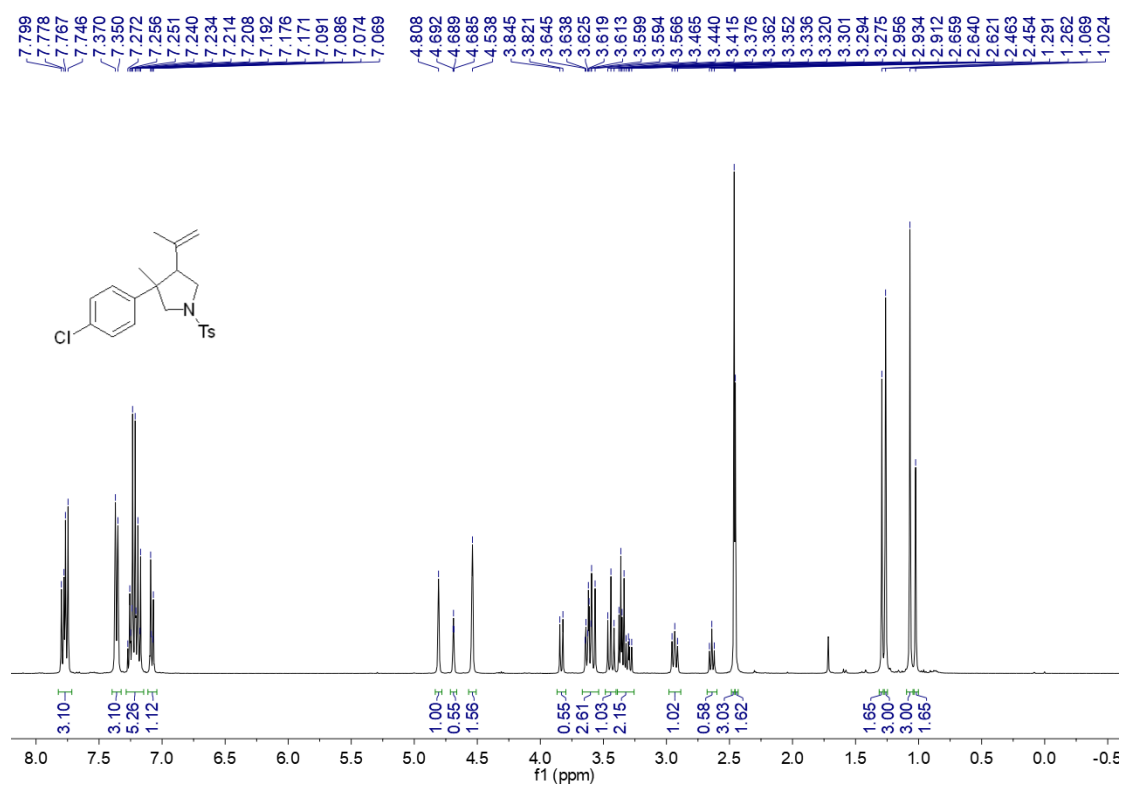

<sup>13</sup>C NMR (CDCl<sub>3</sub>, 101 MHz)

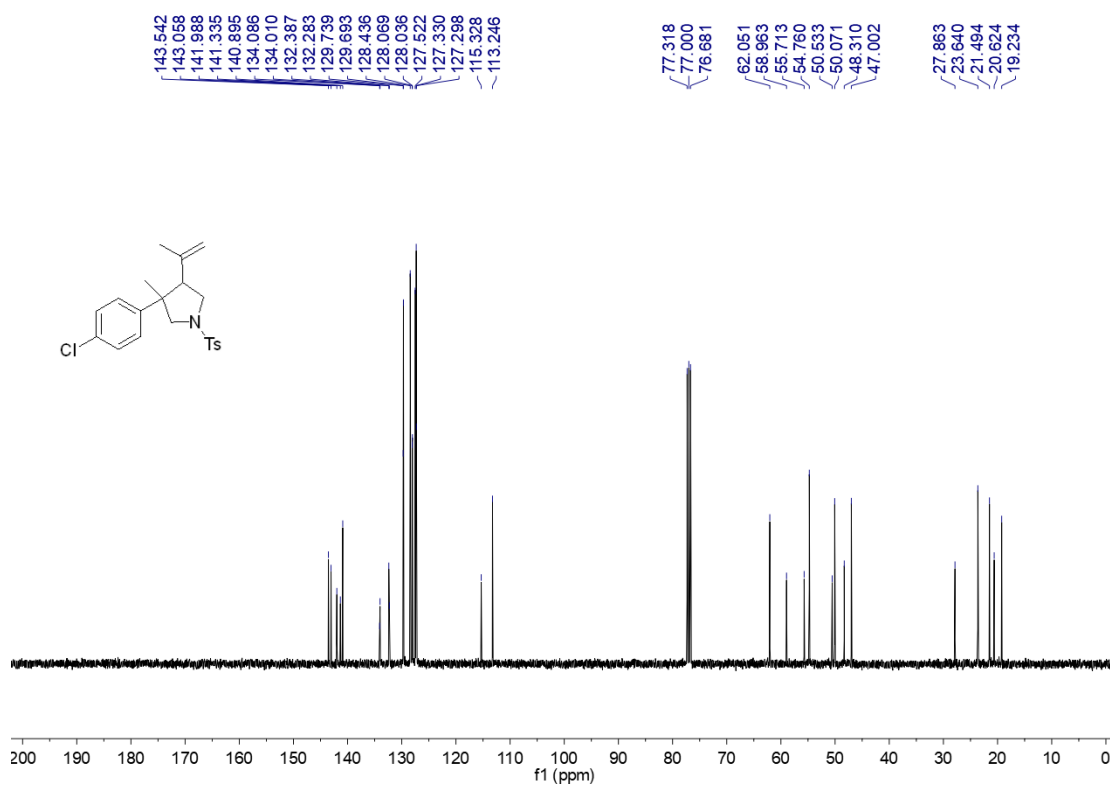

(2k)

<sup>1</sup>H NMR (CDCl<sub>3</sub>, 400 MHz)

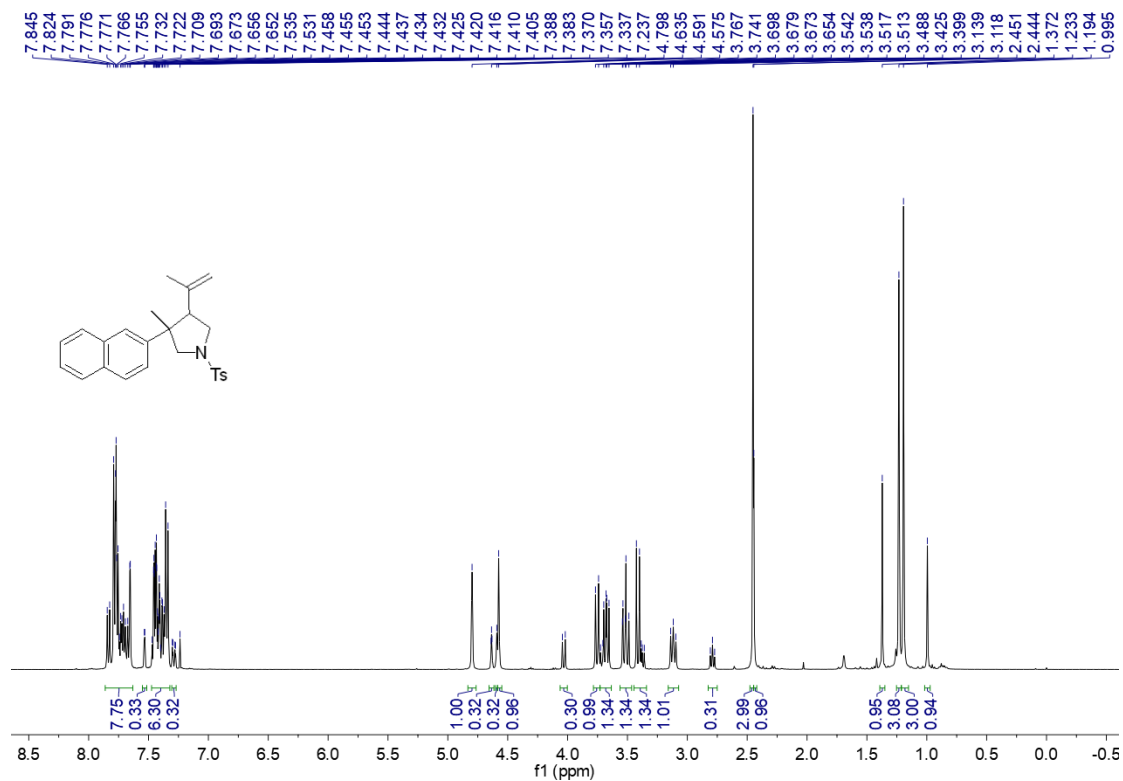

<sup>13</sup>C NMR (CDCl<sub>3</sub>, 101 MHz)

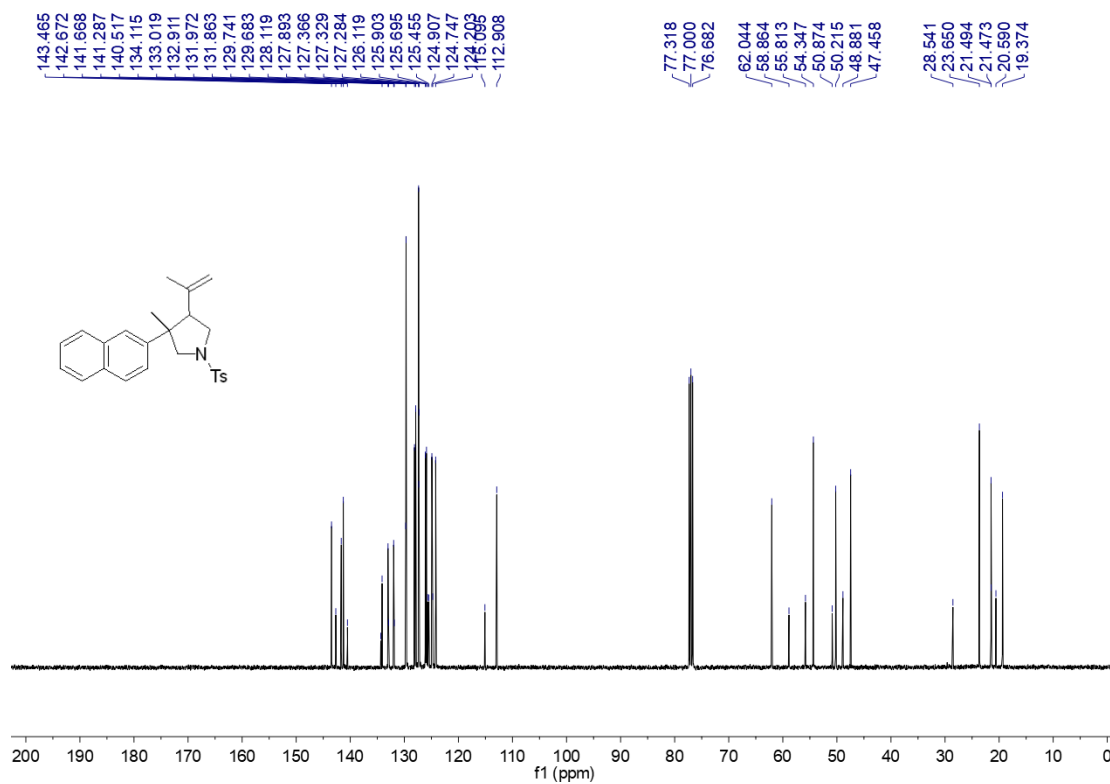

(21)

<sup>1</sup>H NMR (CDCl<sub>3</sub>, 400 MHz)

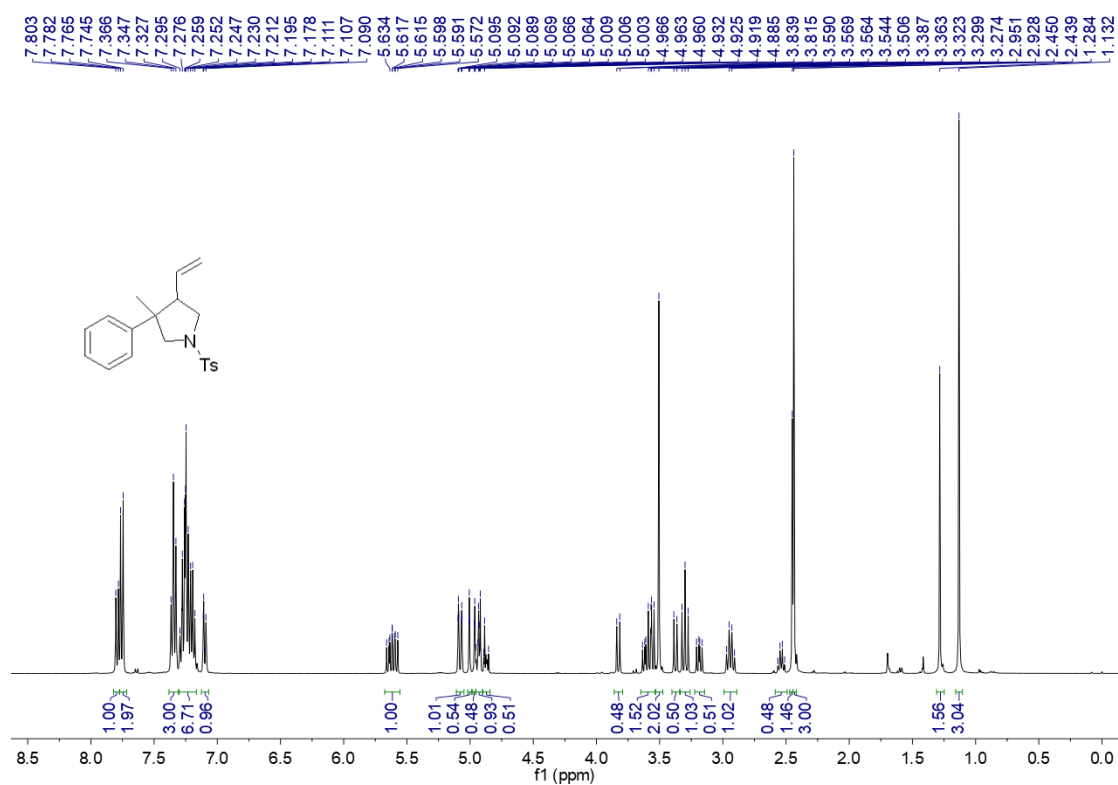

<sup>13</sup>C NMR (CDCl<sub>3</sub>, 101 MHz)

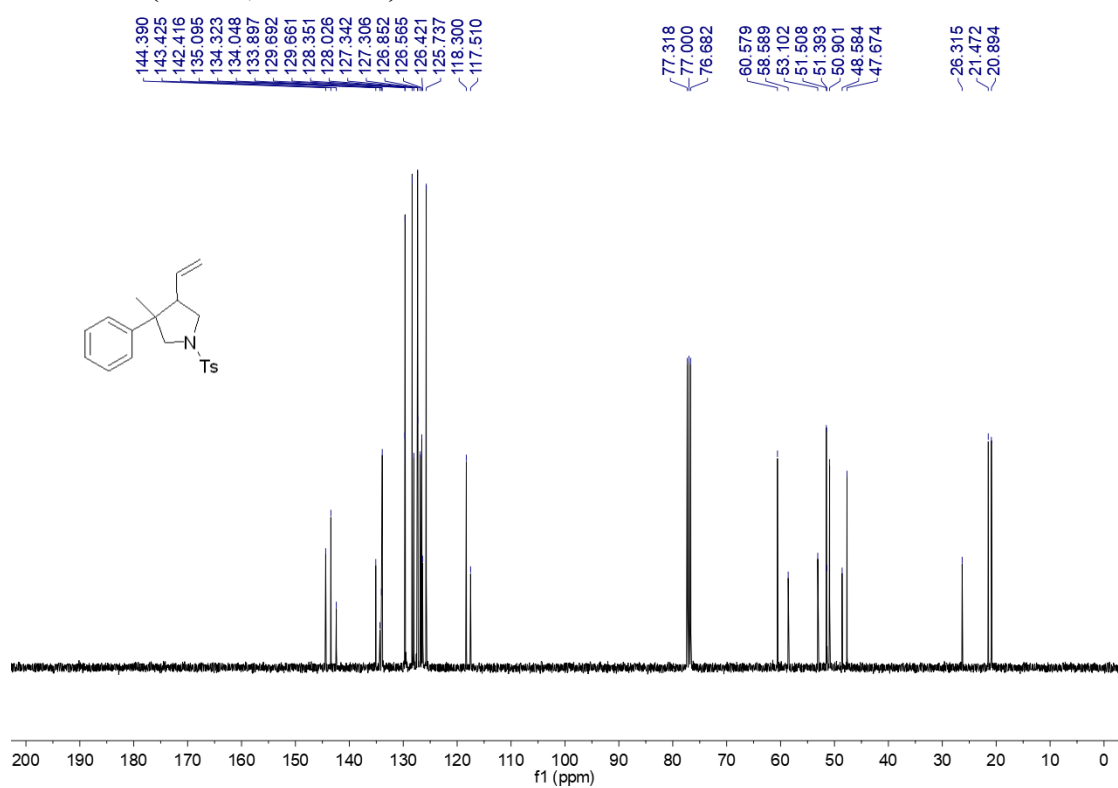

**(2m and 2m')**  
**<sup>1</sup>H NMR (CDCl<sub>3</sub>, 400 MHz)**

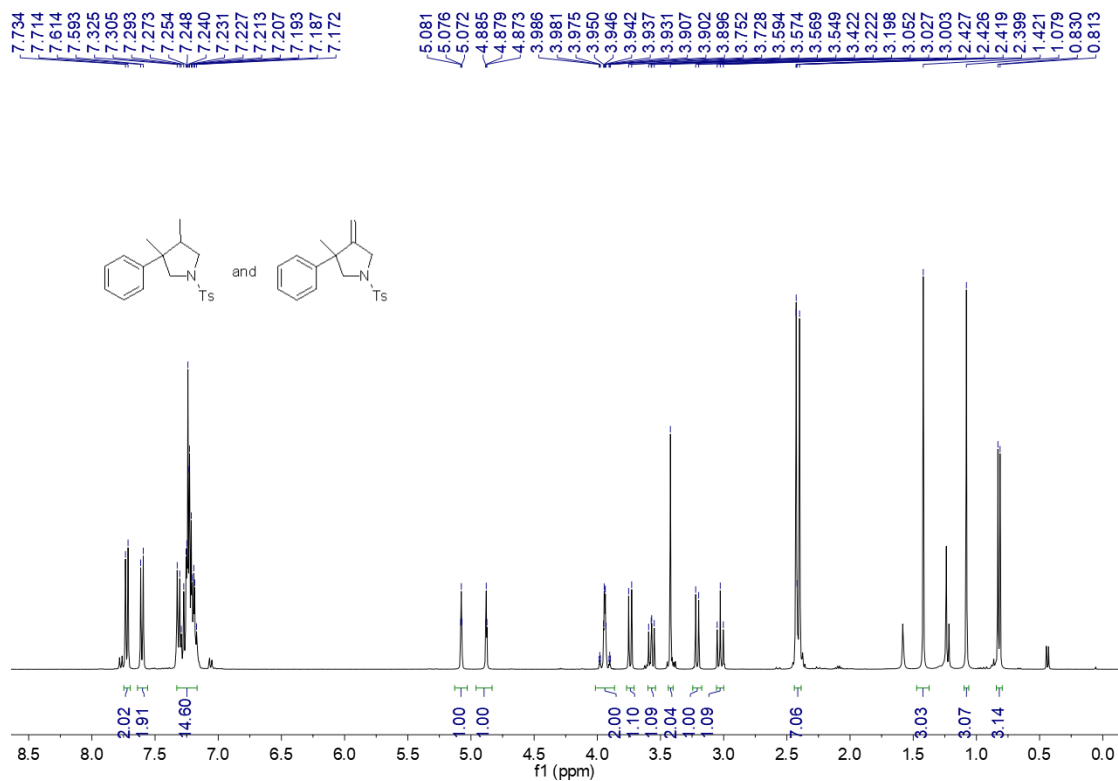

**<sup>13</sup>C NMR (CDCl<sub>3</sub>, 101 MHz)**

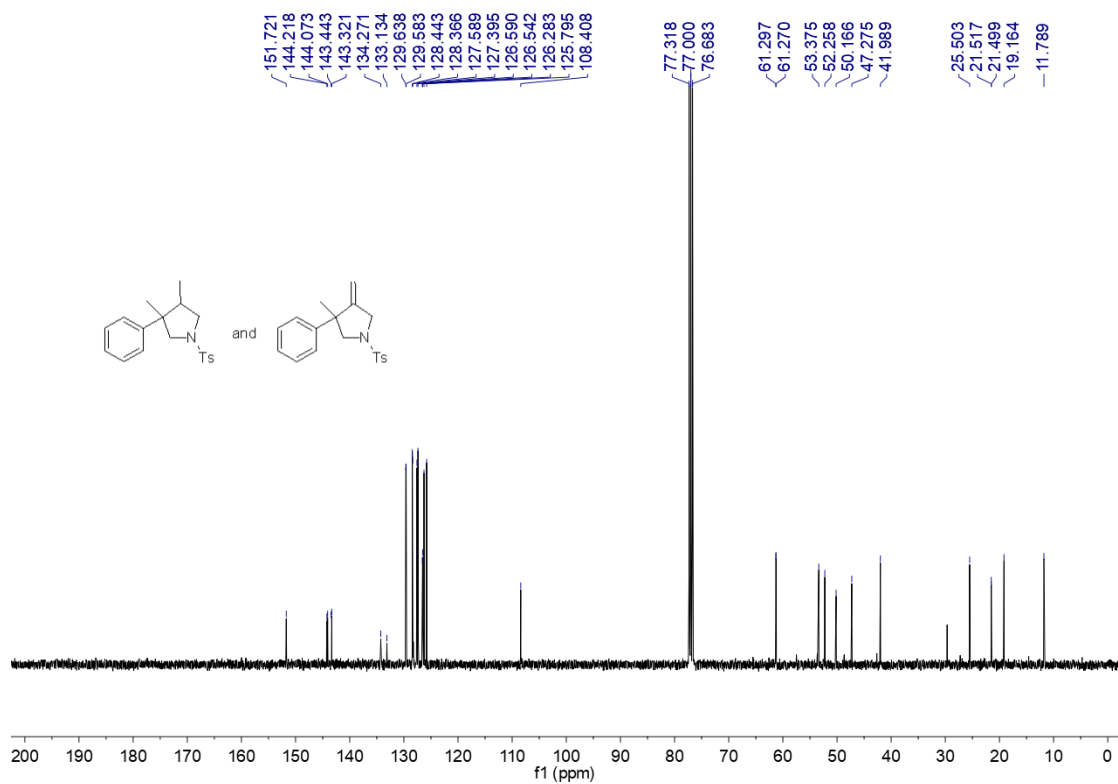

**(2n)**  
**<sup>1</sup>H NMR (CDCl<sub>3</sub>, 400 MHz)**

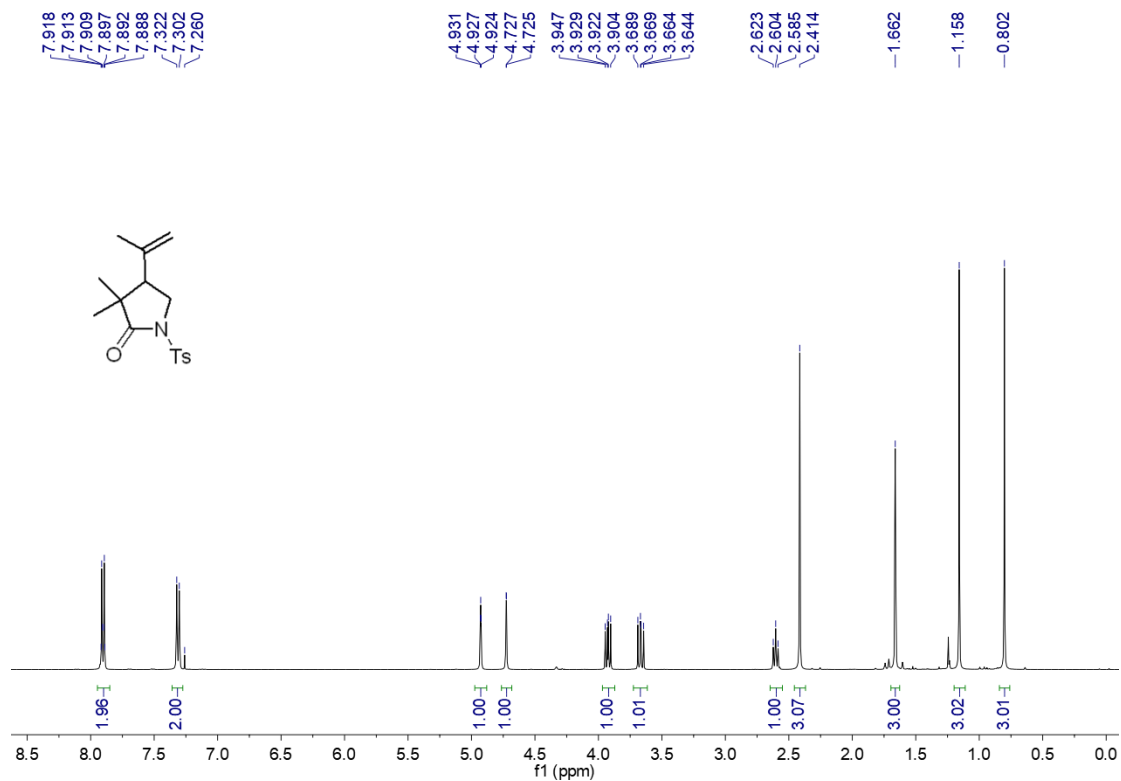

**<sup>13</sup>C NMR (CDCl<sub>3</sub>, 101 MHz)**

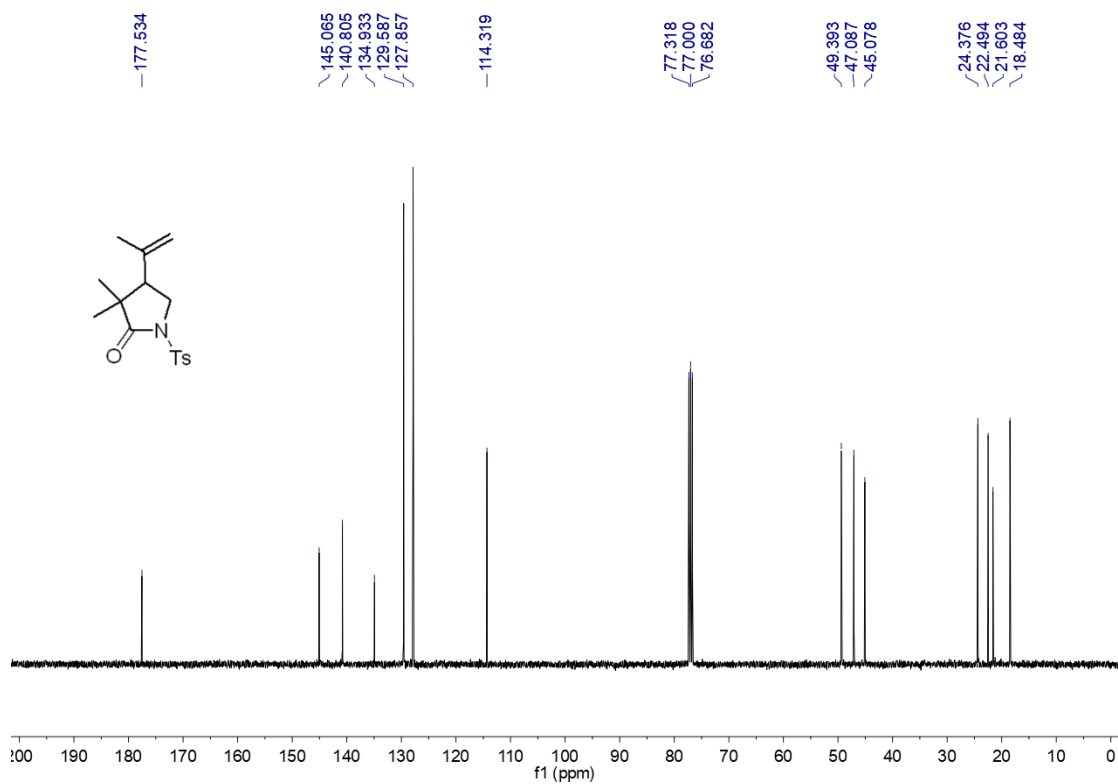

(2o)  
<sup>1</sup>H NMR (CDCl<sub>3</sub>, 400 MHz)

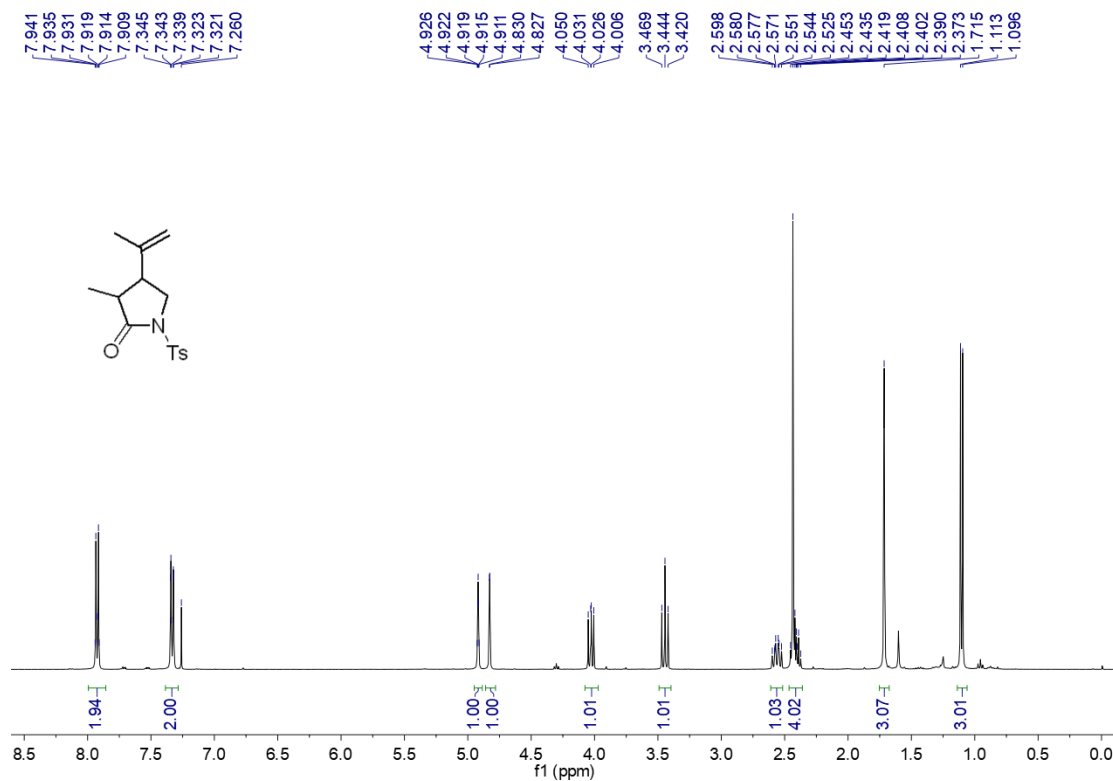

<sup>13</sup>C NMR (CDCl<sub>3</sub>, 101 MHz)

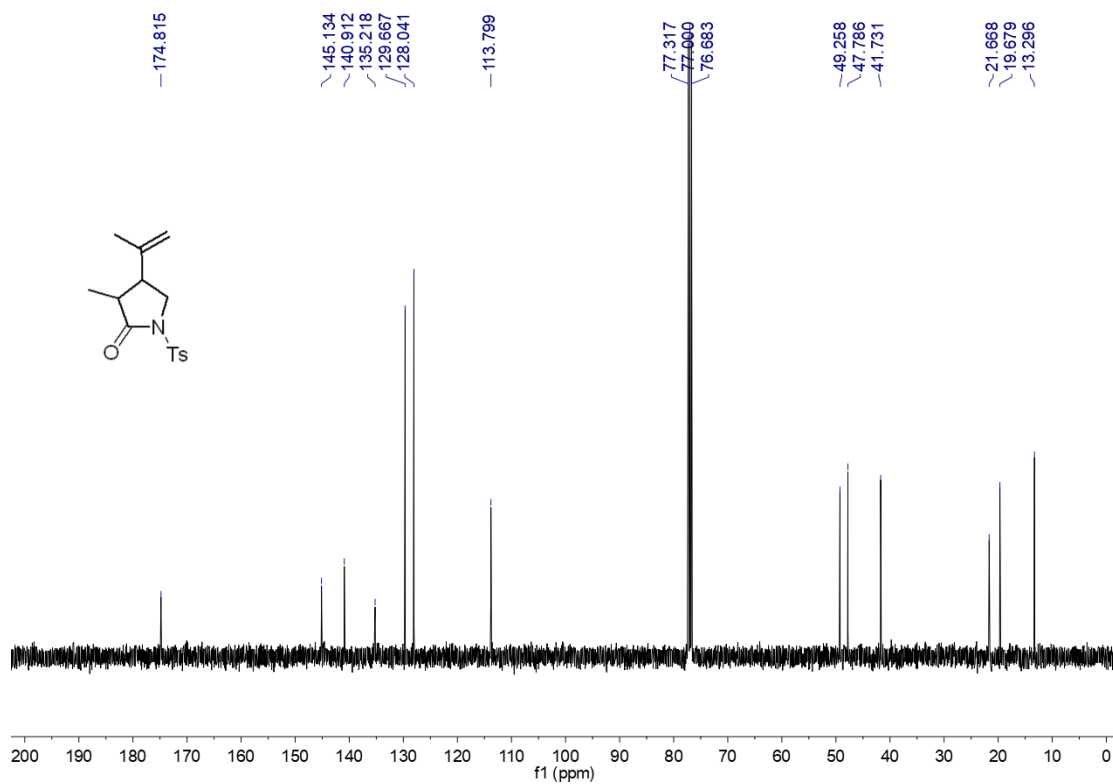

(2p)  
<sup>1</sup>H NMR (CDCl<sub>3</sub>, 400 MHz)

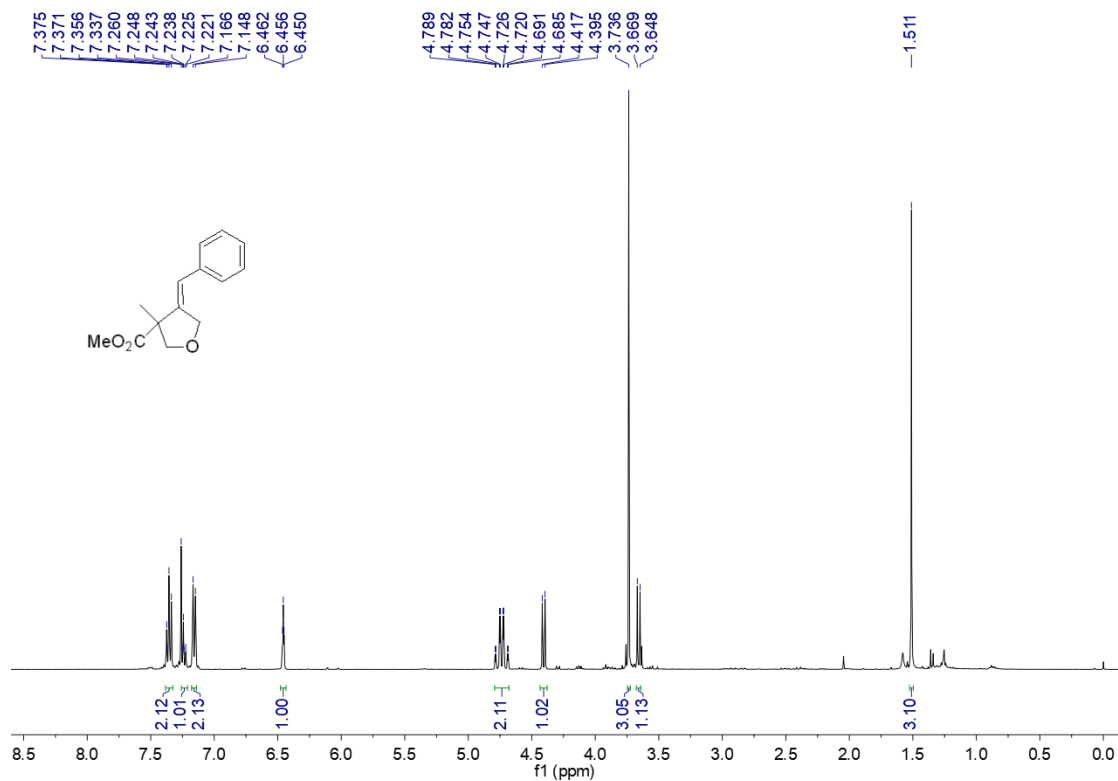

<sup>13</sup>C NMR (CDCl<sub>3</sub>, 101 MHz)

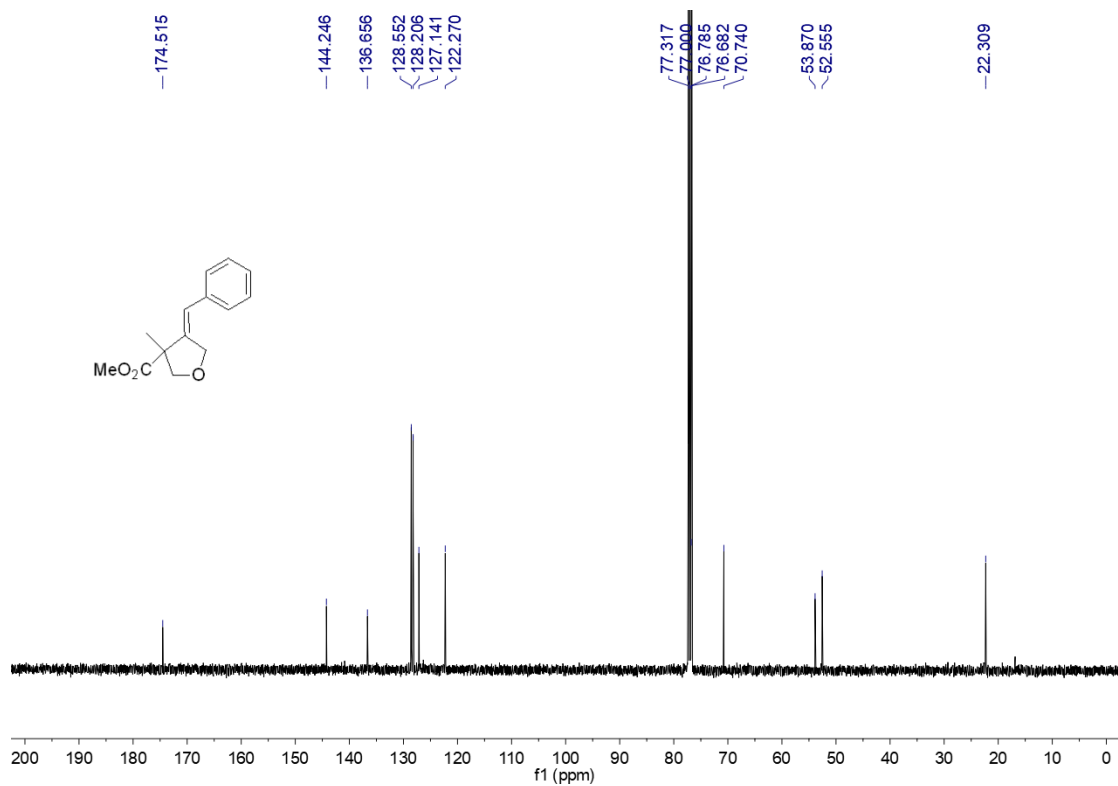

(2q)  
<sup>1</sup>H NMR (CDCl<sub>3</sub>, 400 MHz)

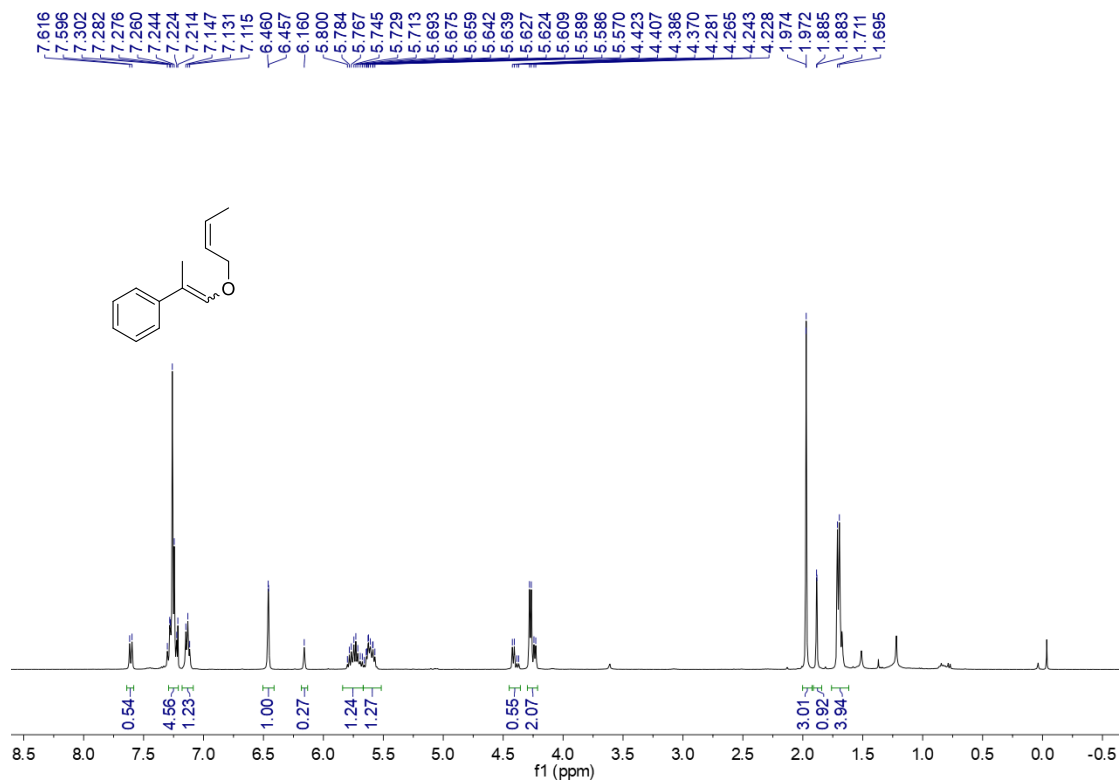

<sup>13</sup>C NMR (CDCl<sub>3</sub>, 101 MHz)

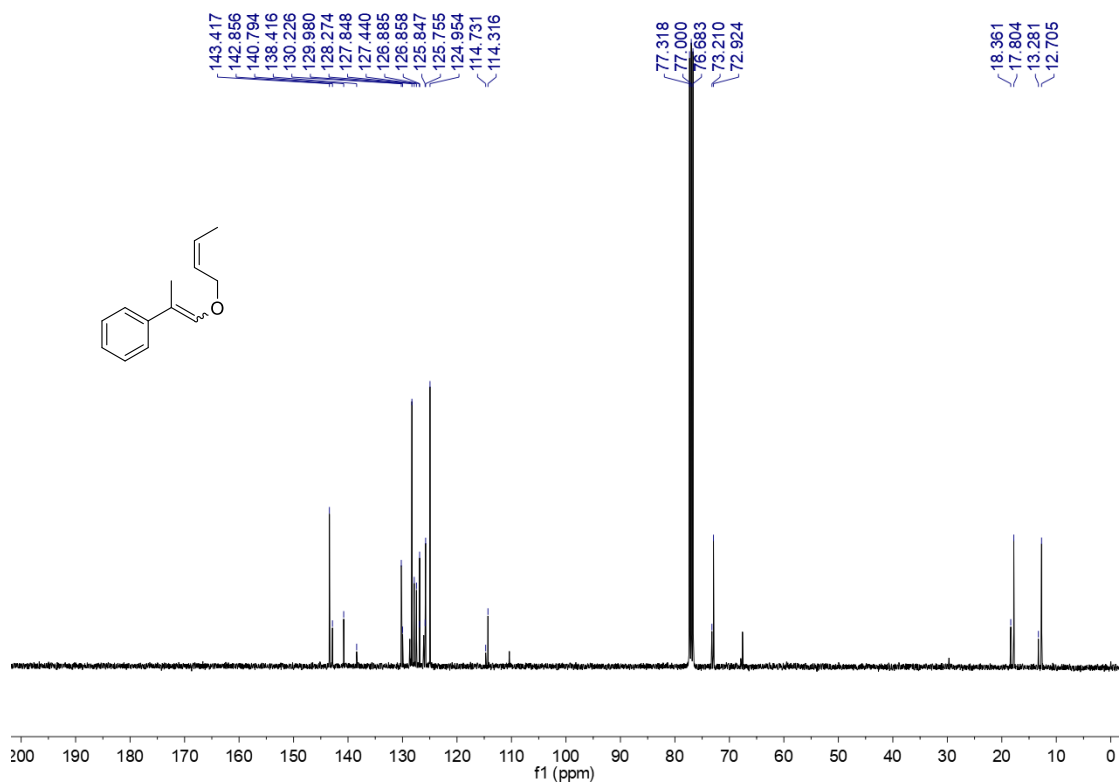



(2r)

<sup>1</sup>H NMR (CDCl<sub>3</sub>, 400 MHz)

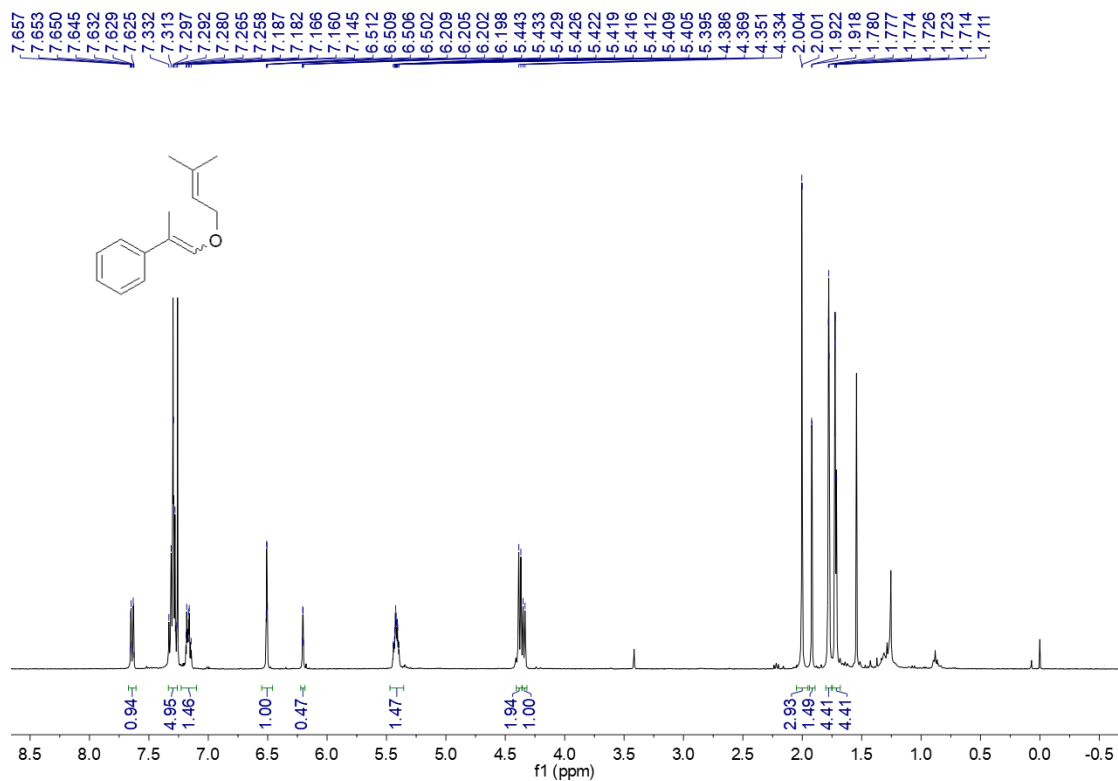

<sup>13</sup>C NMR (CDCl<sub>3</sub>, 101 MHz)

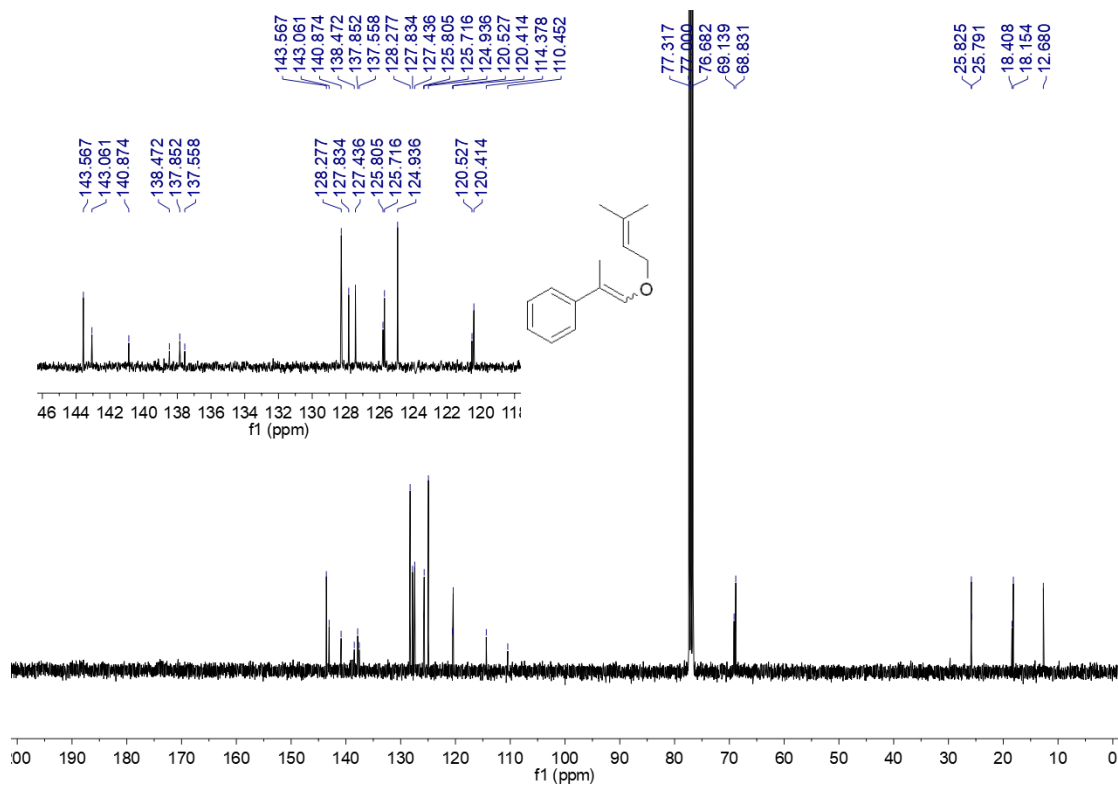

(2s)

$^1\text{H}$  NMR ( $\text{CDCl}_3$ , 400 MHz)

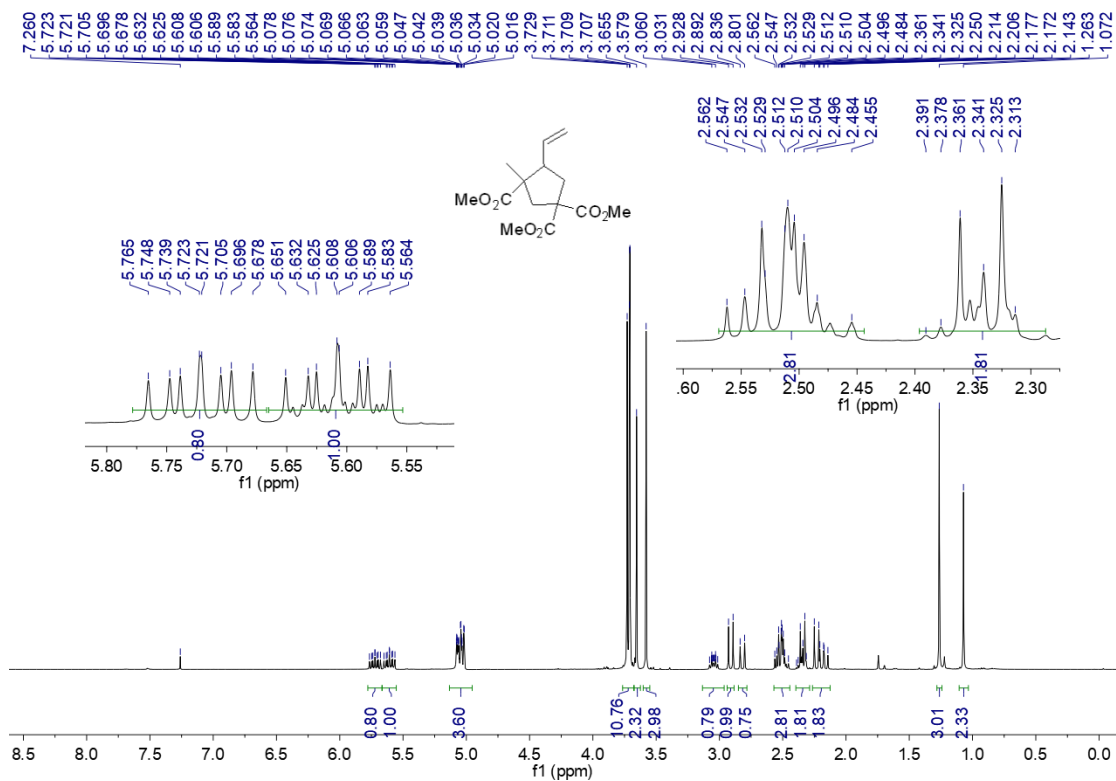

$^{13}\text{C}$  NMR ( $\text{CDCl}_3$ , 101 MHz)

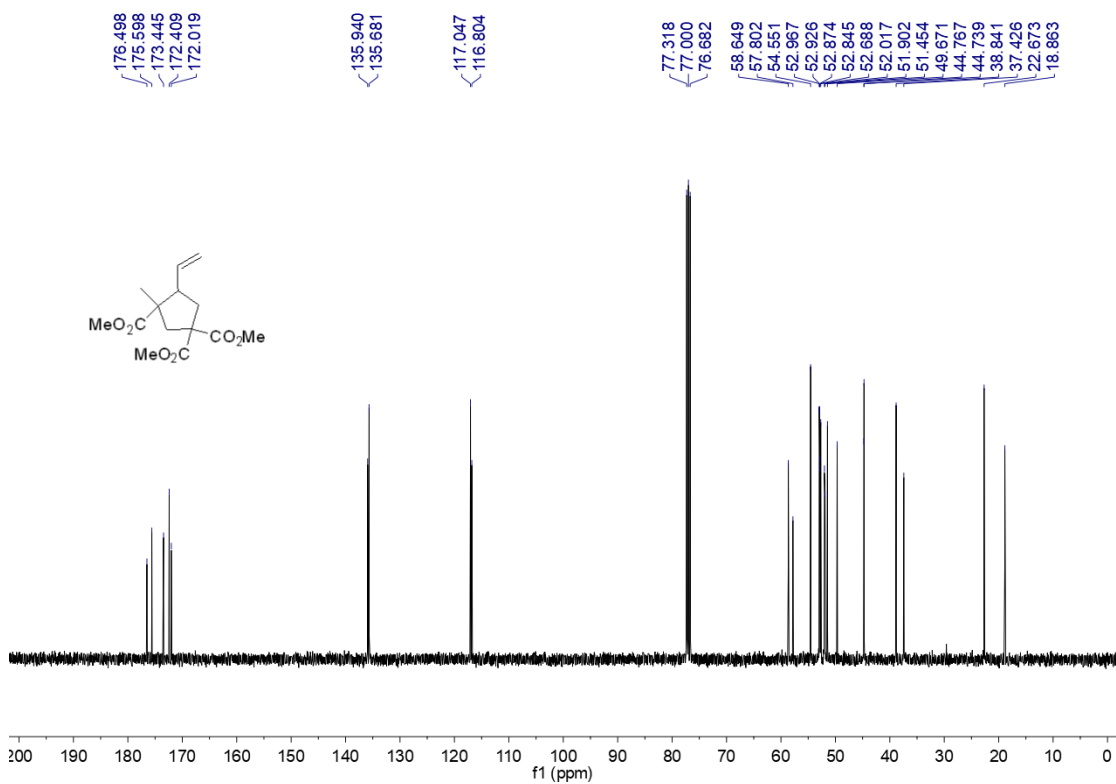

(2t)

<sup>1</sup>H NMR (CDCl<sub>3</sub>, 400 MHz)

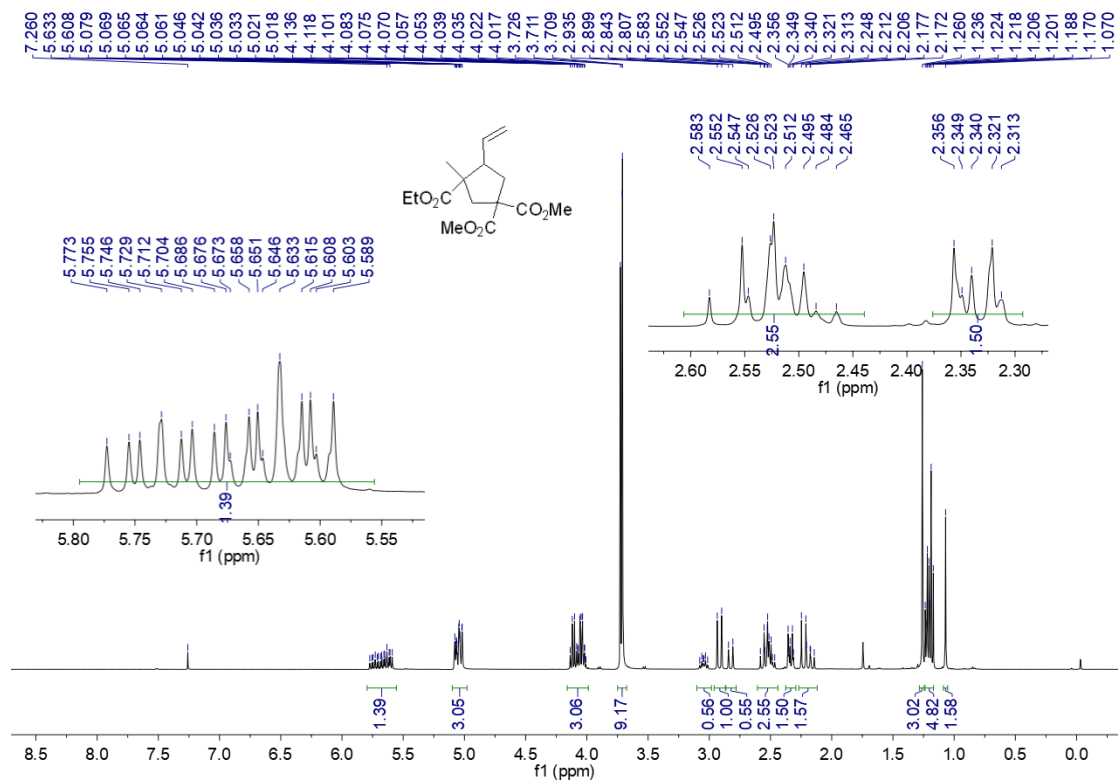

<sup>13</sup>C NMR (CDCl<sub>3</sub>, 101 MHz)

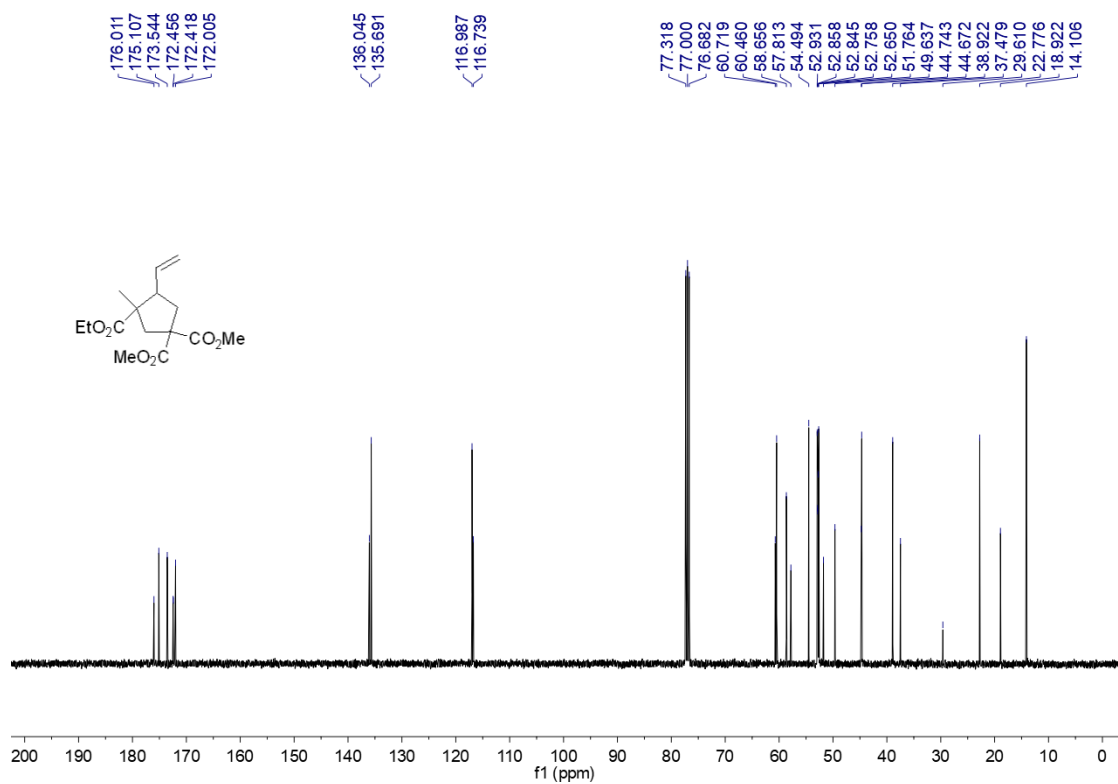

(2u)

<sup>1</sup>H NMR (CDCl<sub>3</sub>, 400 MHz)

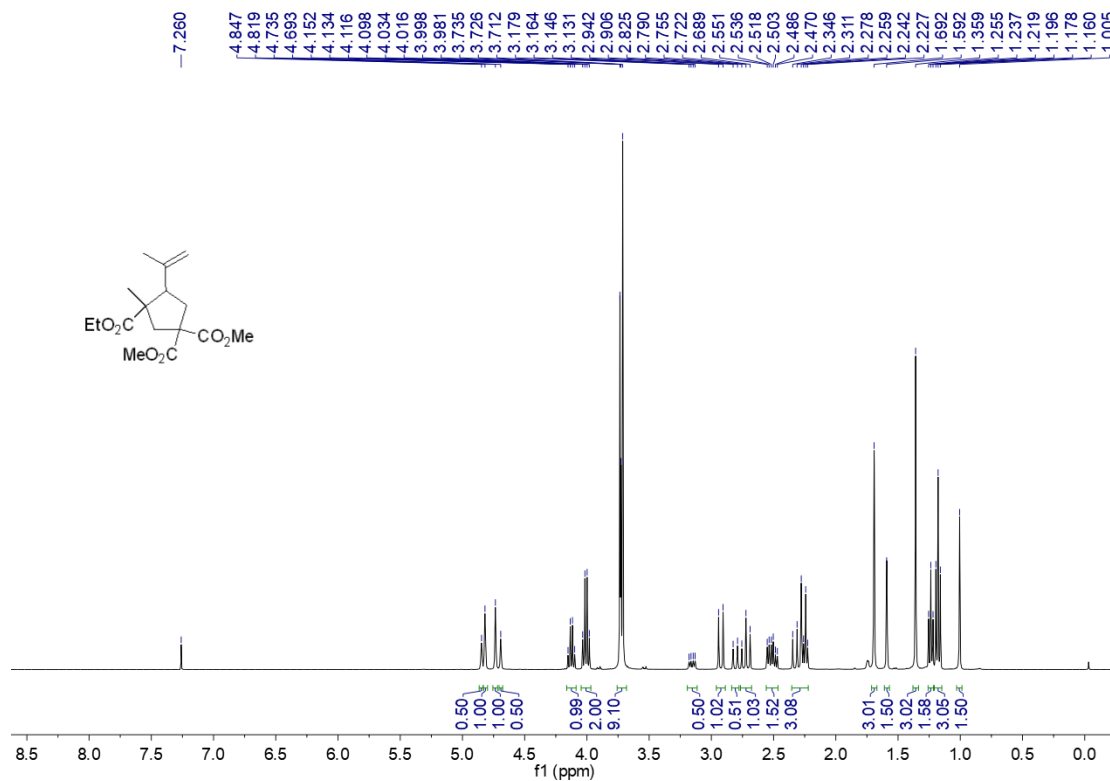

<sup>13</sup>C NMR (CDCl<sub>3</sub>, 101 MHz)

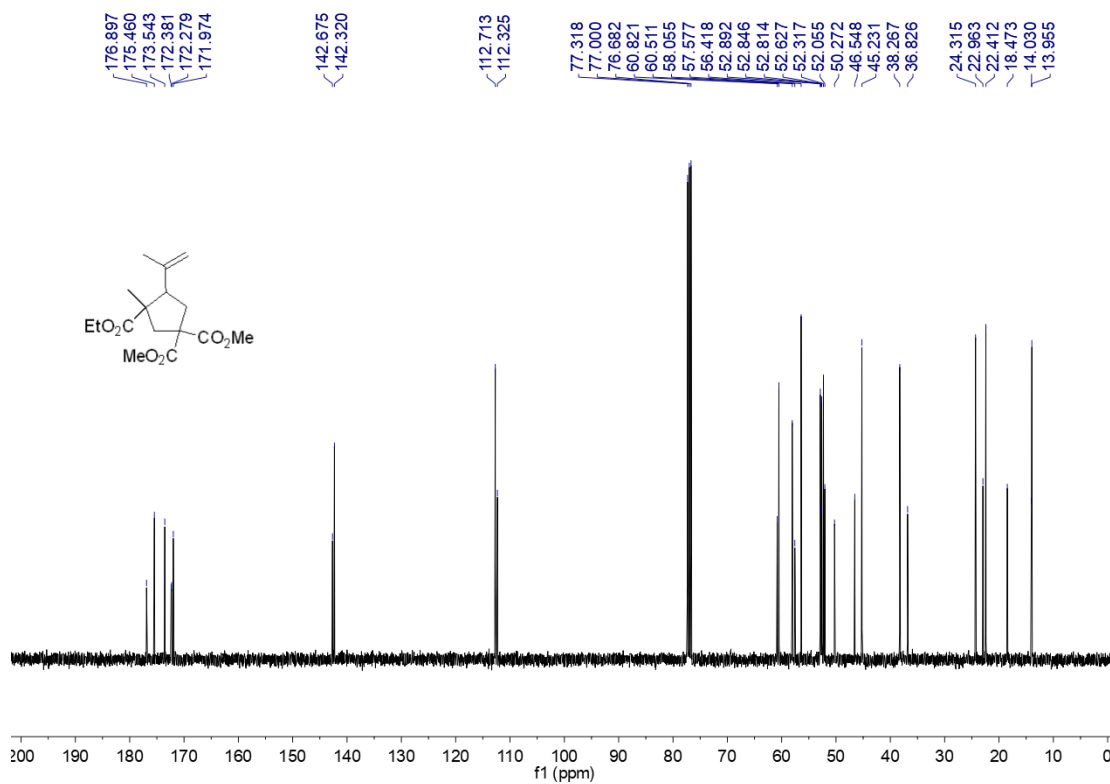

(2v)  
<sup>1</sup>H NMR (CDCl<sub>3</sub>, 400 MHz)

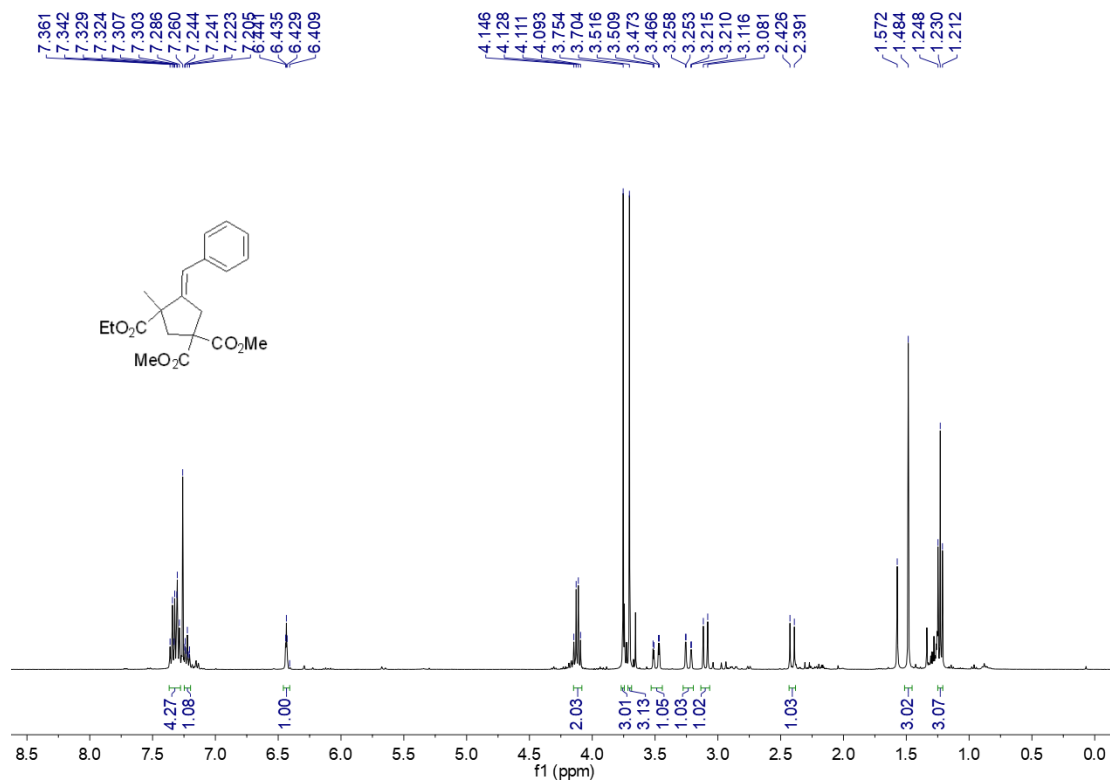

<sup>13</sup>C NMR (CDCl<sub>3</sub>, 101 MHz)

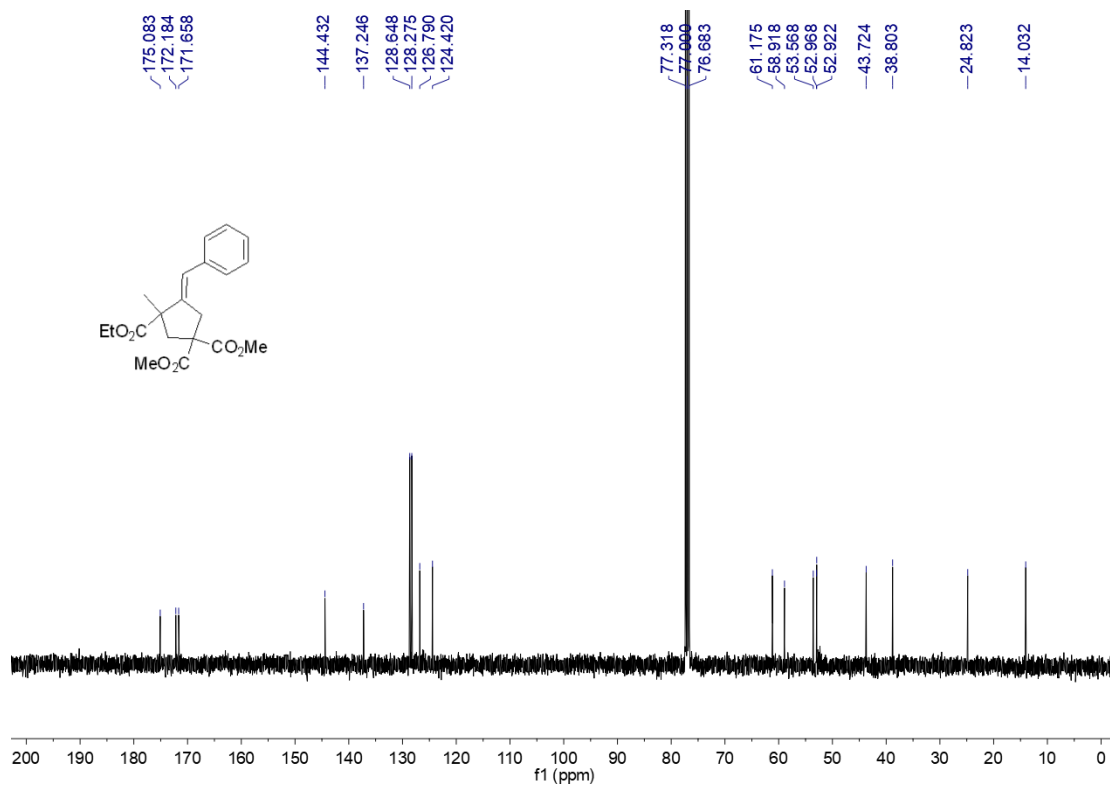

**(2w)**  
**<sup>1</sup>H NMR (CDCl<sub>3</sub>, 400 MHz)**

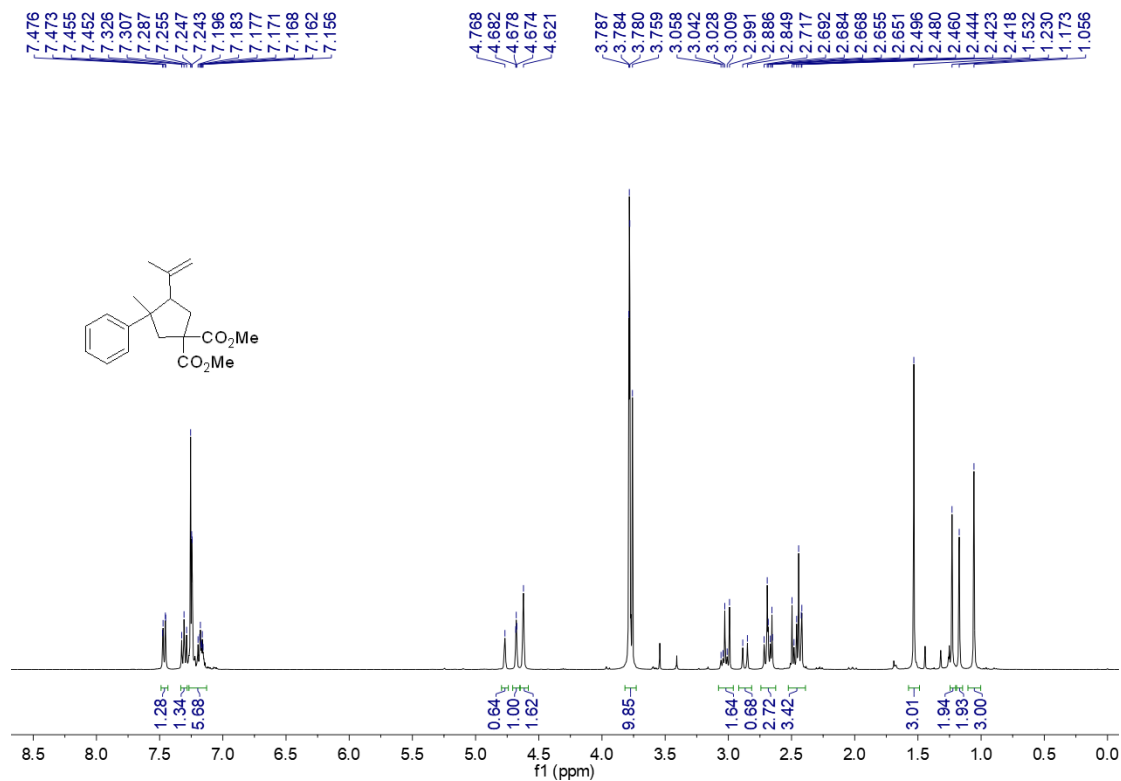

**<sup>13</sup>C NMR (CDCl<sub>3</sub>, 101 MHz)**

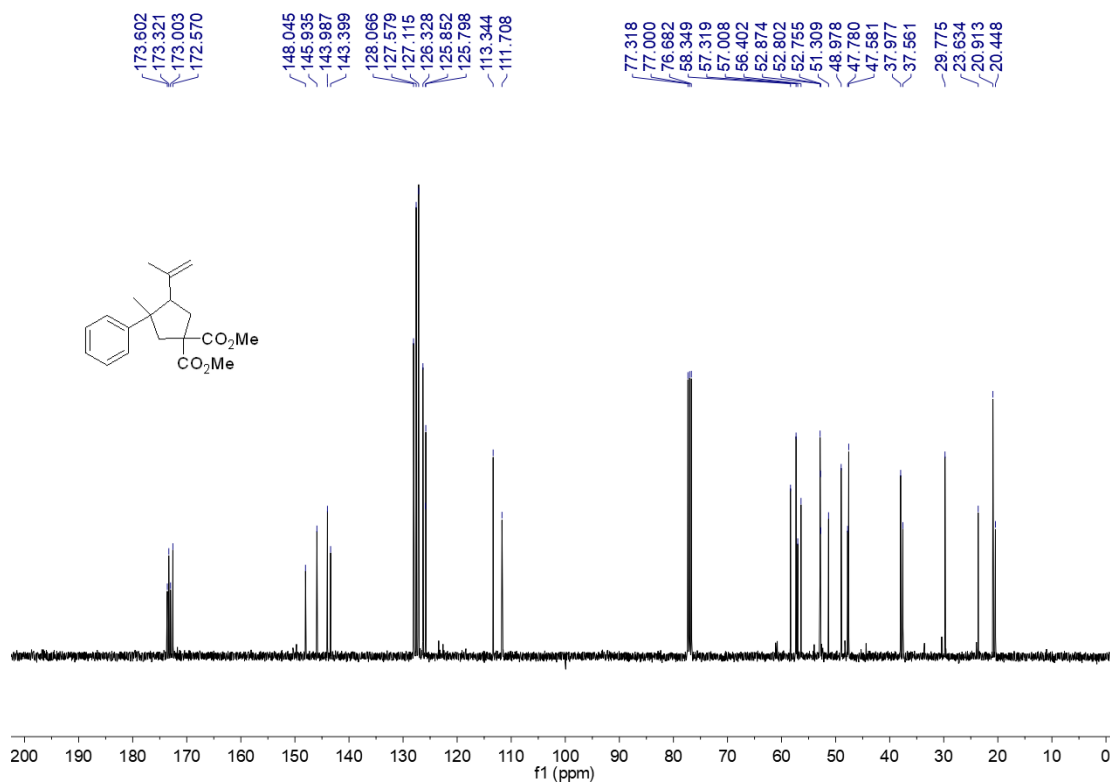

(4a)

$^1\text{H}$  NMR ( $\text{CDCl}_3$ , 400 MHz)

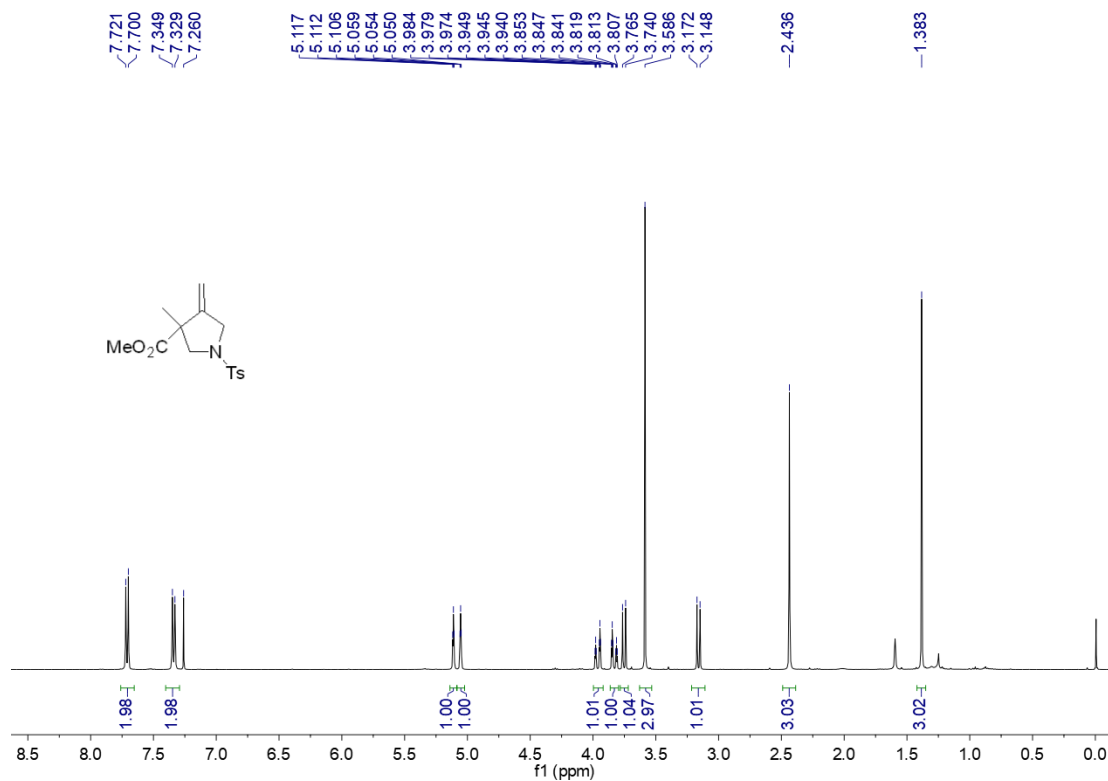

$^{13}\text{C}$  NMR ( $\text{CDCl}_3$ , 101 MHz)

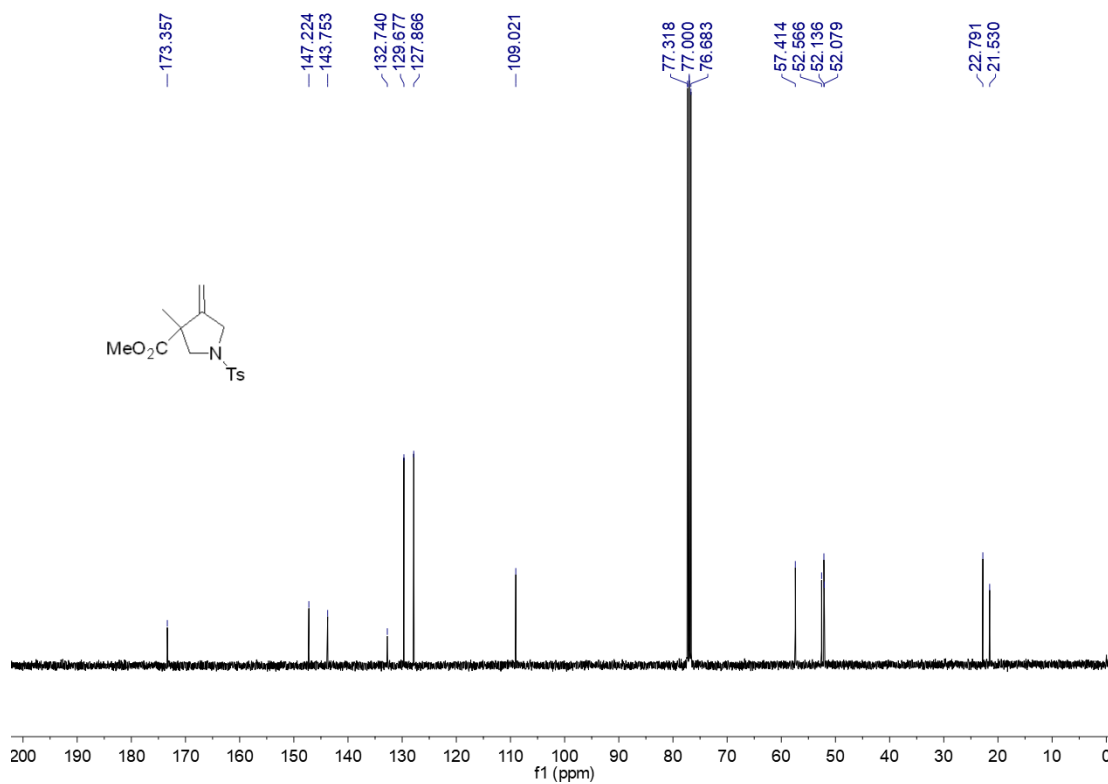

(4b)

$^1\text{H}$  NMR ( $\text{CDCl}_3$ , 400 MHz)

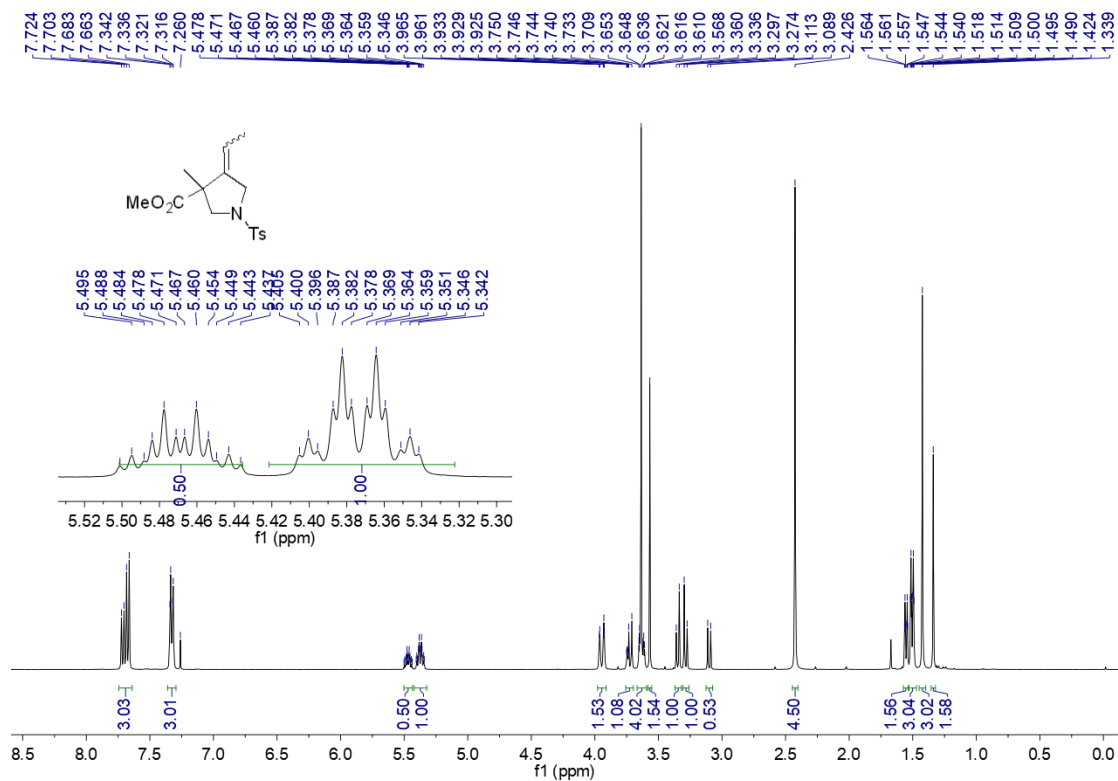

$^{13}\text{C}$  NMR ( $\text{CDCl}_3$ , 101 MHz)

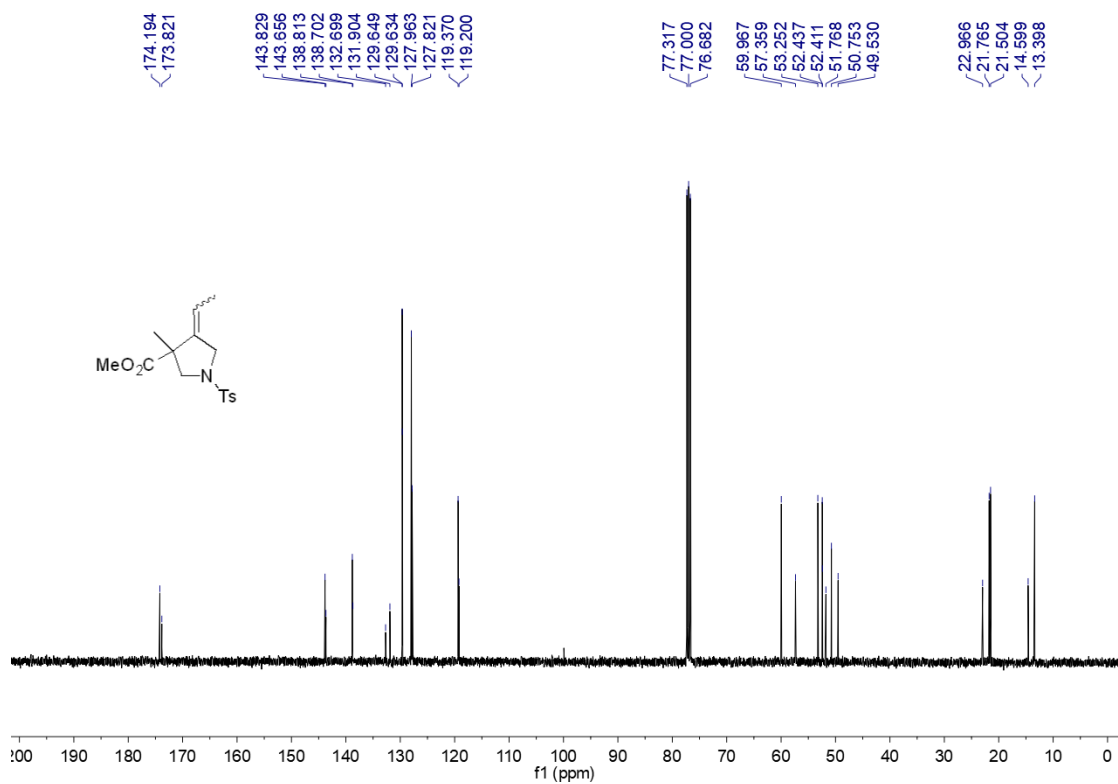



(4c)

$^1\text{H}$  NMR ( $\text{CDCl}_3$ , 400 MHz)

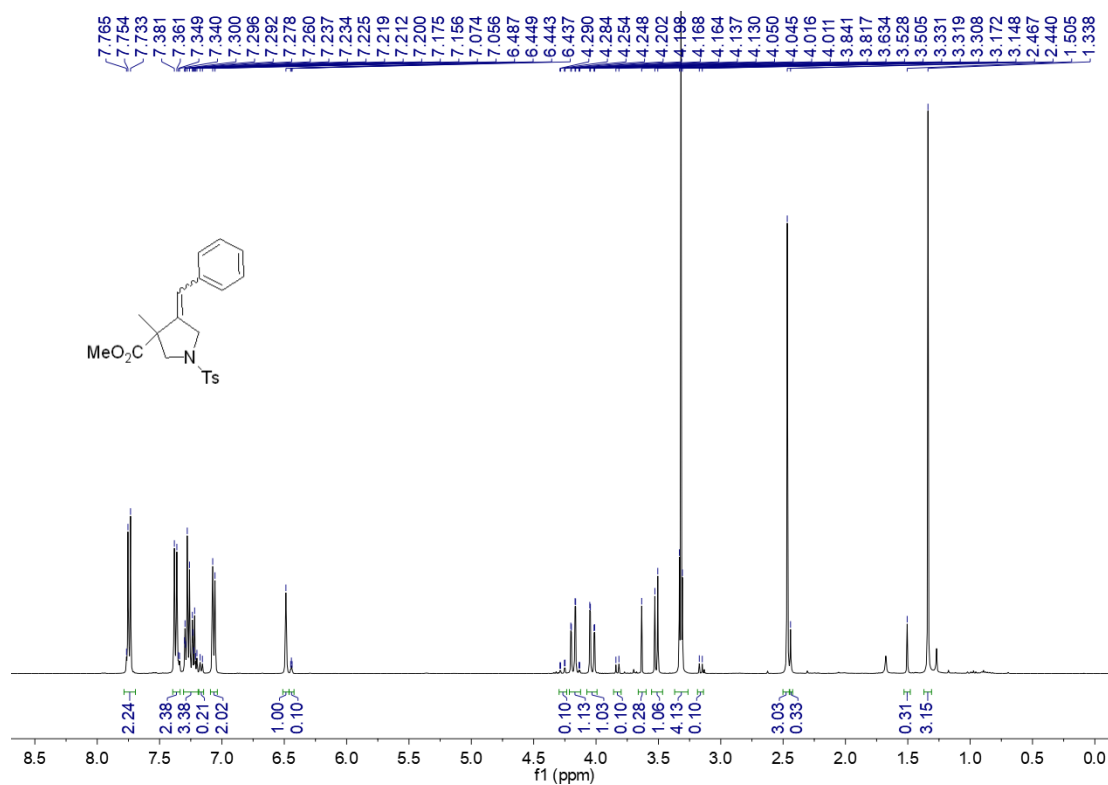

$^{13}\text{C}$  NMR ( $\text{CDCl}_3$ , 101 MHz)

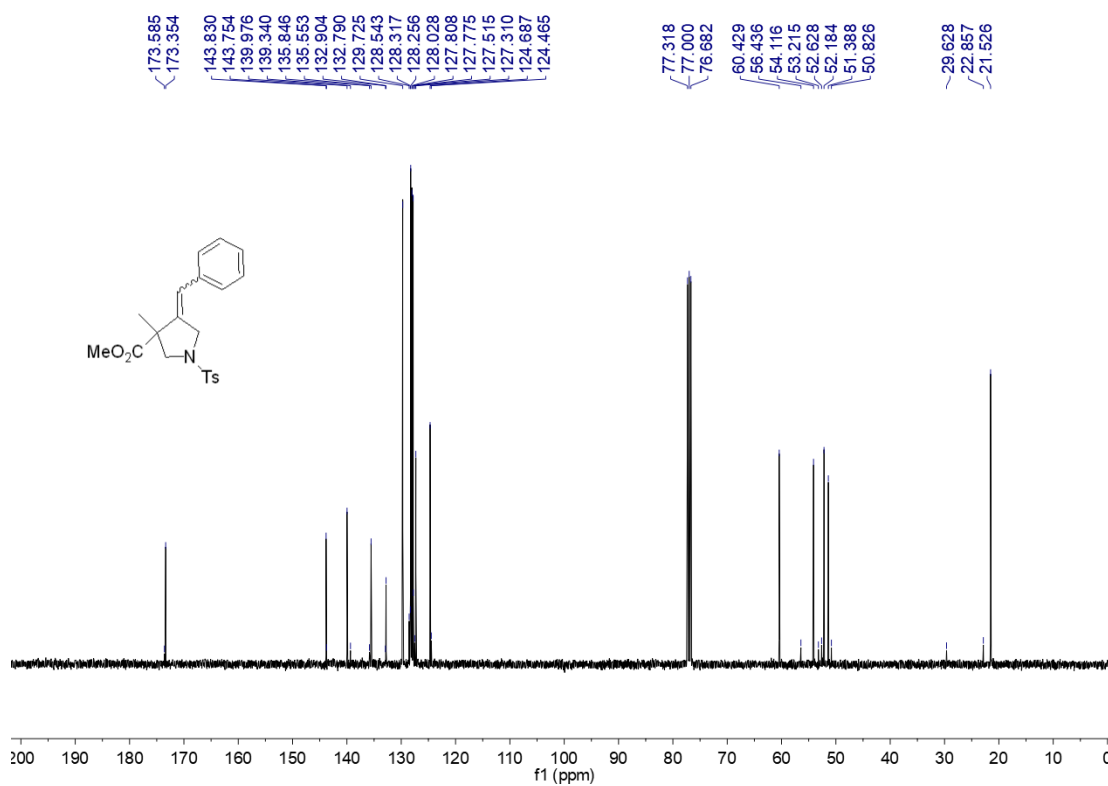

(4d)

$^1\text{H}$  NMR ( $\text{CDCl}_3$ , 400 MHz)

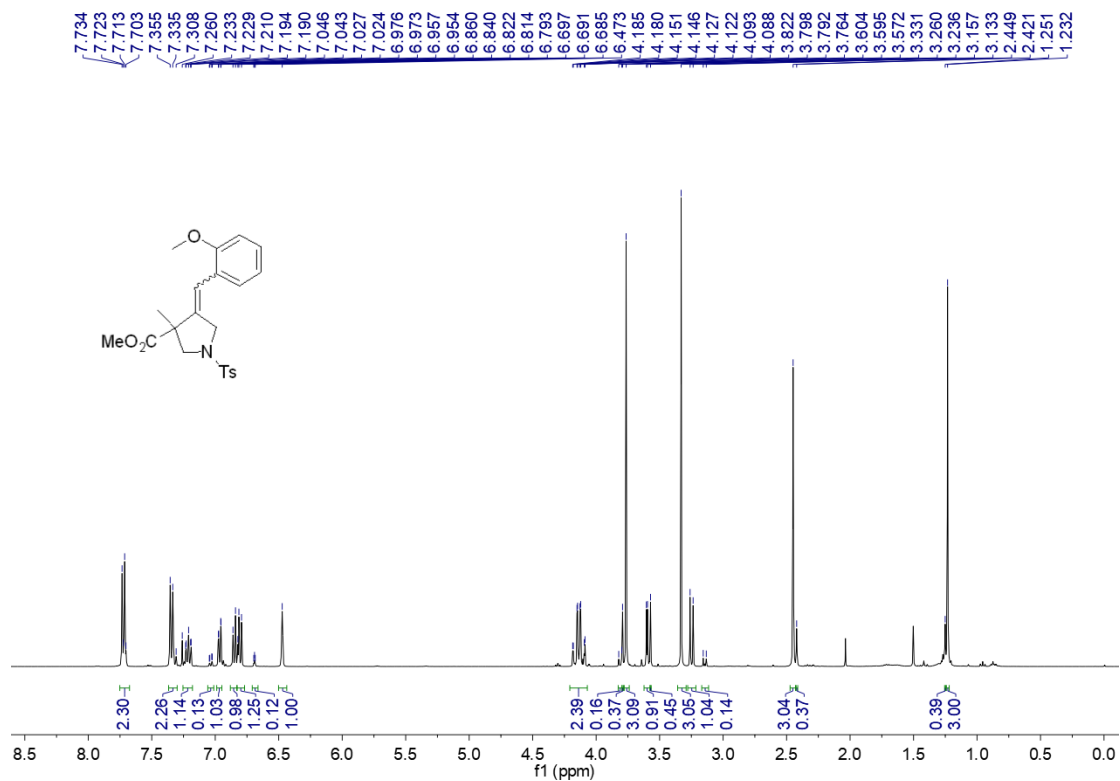

$^{13}\text{C}$  NMR ( $\text{CDCl}_3$ , 101 MHz)

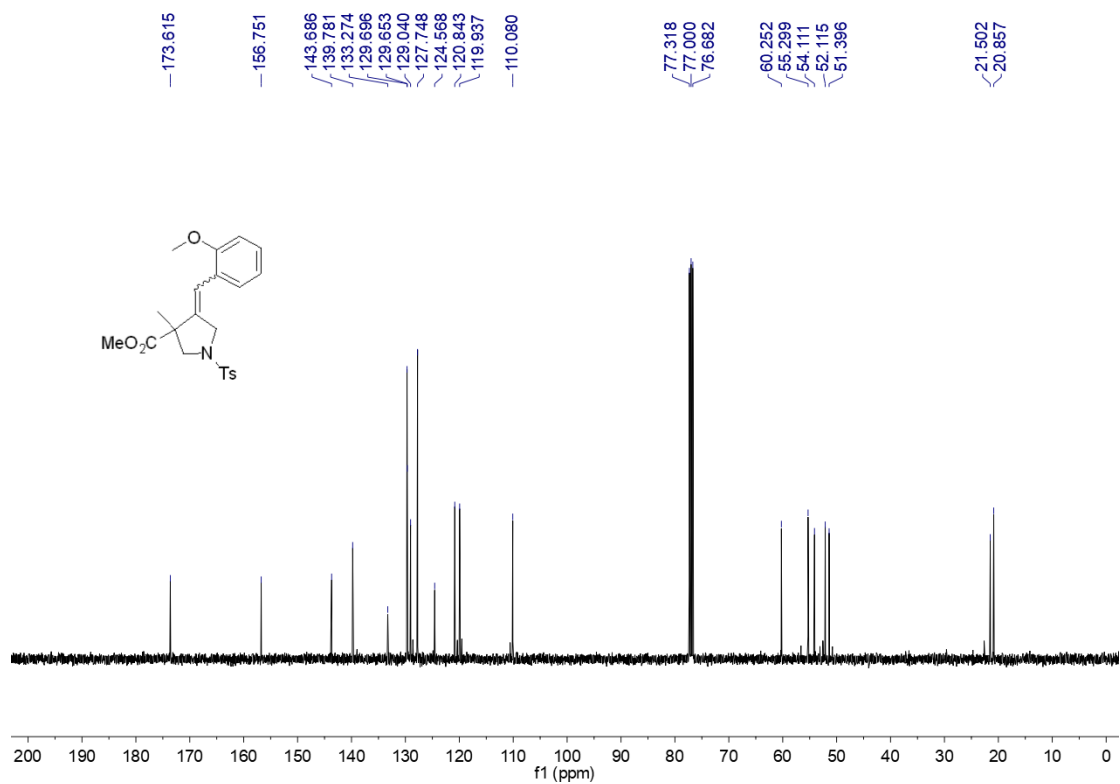

(4e)

$^1\text{H}$  NMR ( $\text{CDCl}_3$ , 400 MHz)

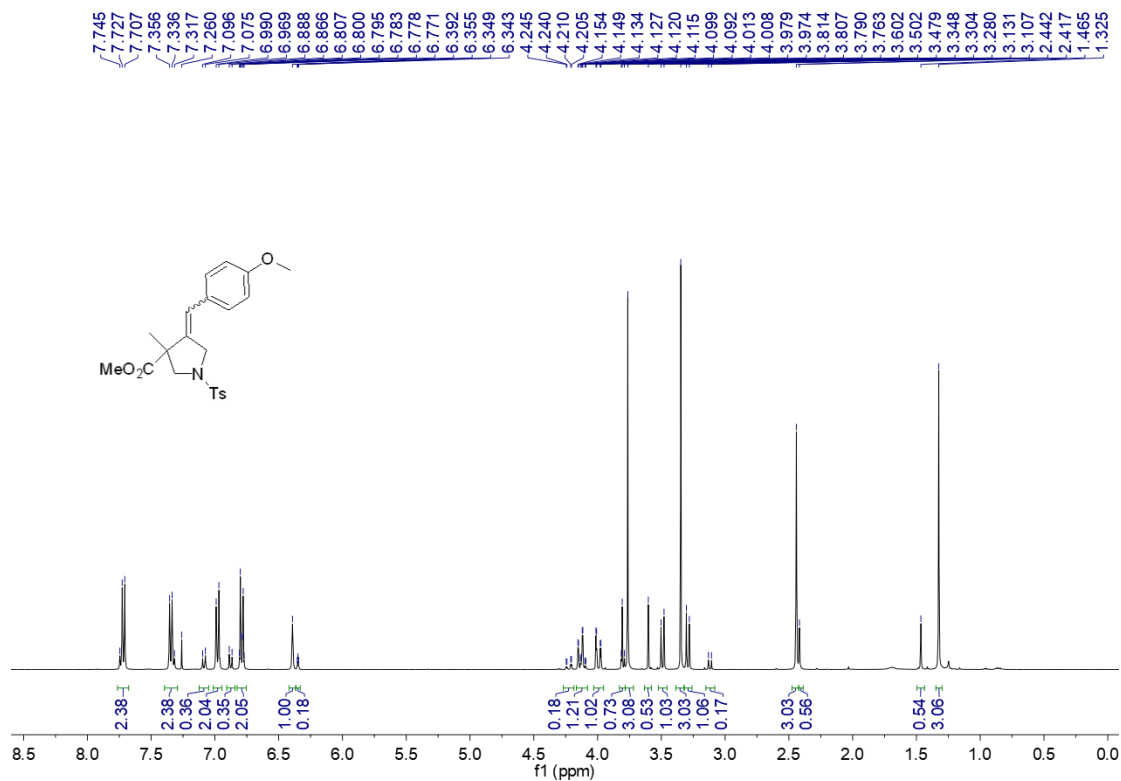

$^{13}\text{C}$  NMR ( $\text{CDCl}_3$ , 101 MHz)

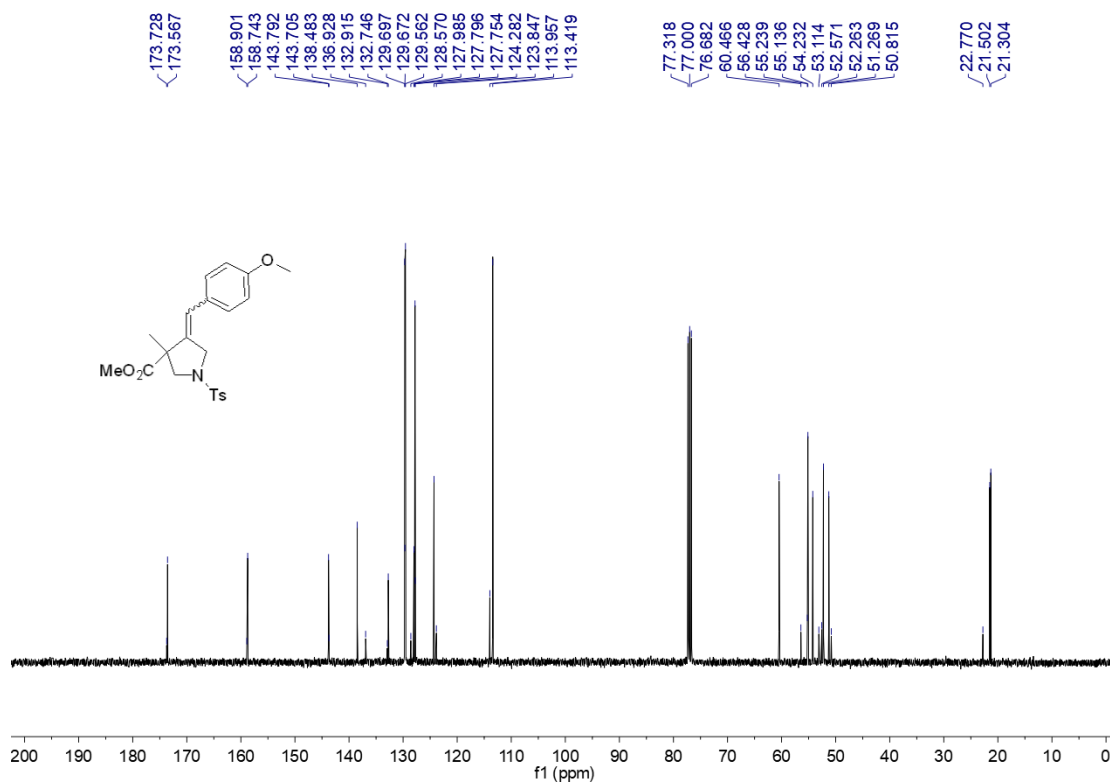

(4f)

$^1\text{H}$  NMR ( $\text{CDCl}_3$ , 400 MHz)

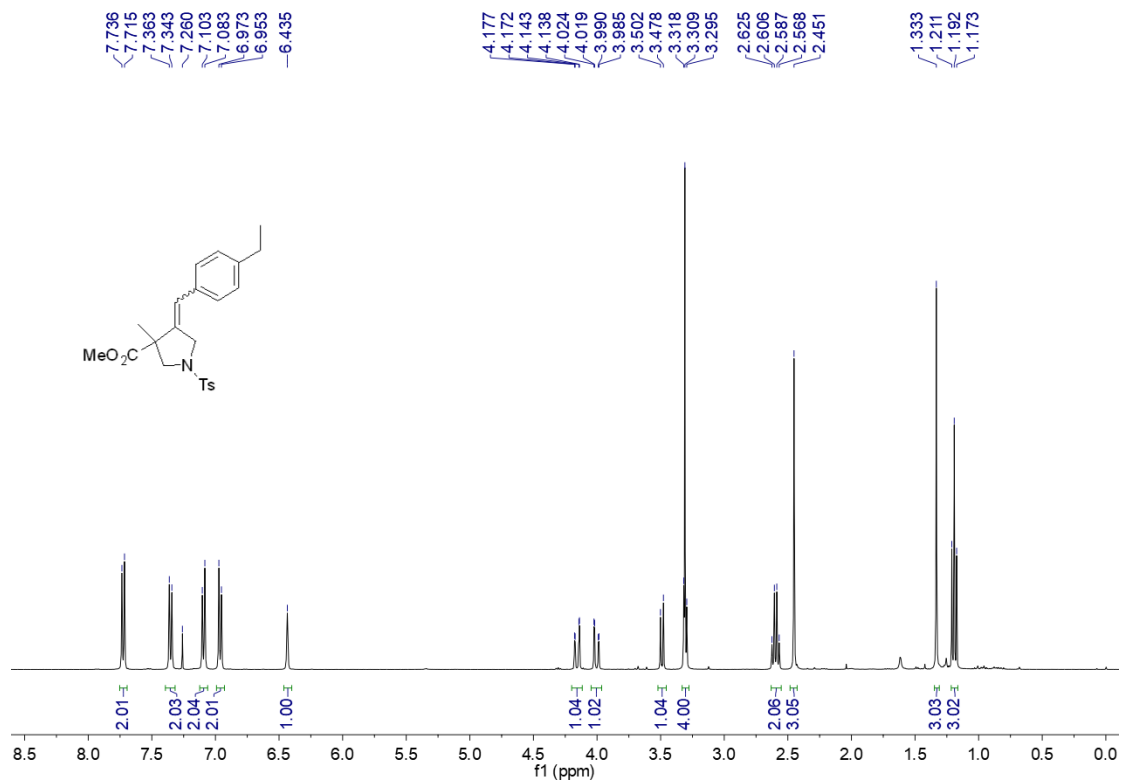

$^{13}\text{C}$  NMR ( $\text{CDCl}_3$ , 101 MHz)

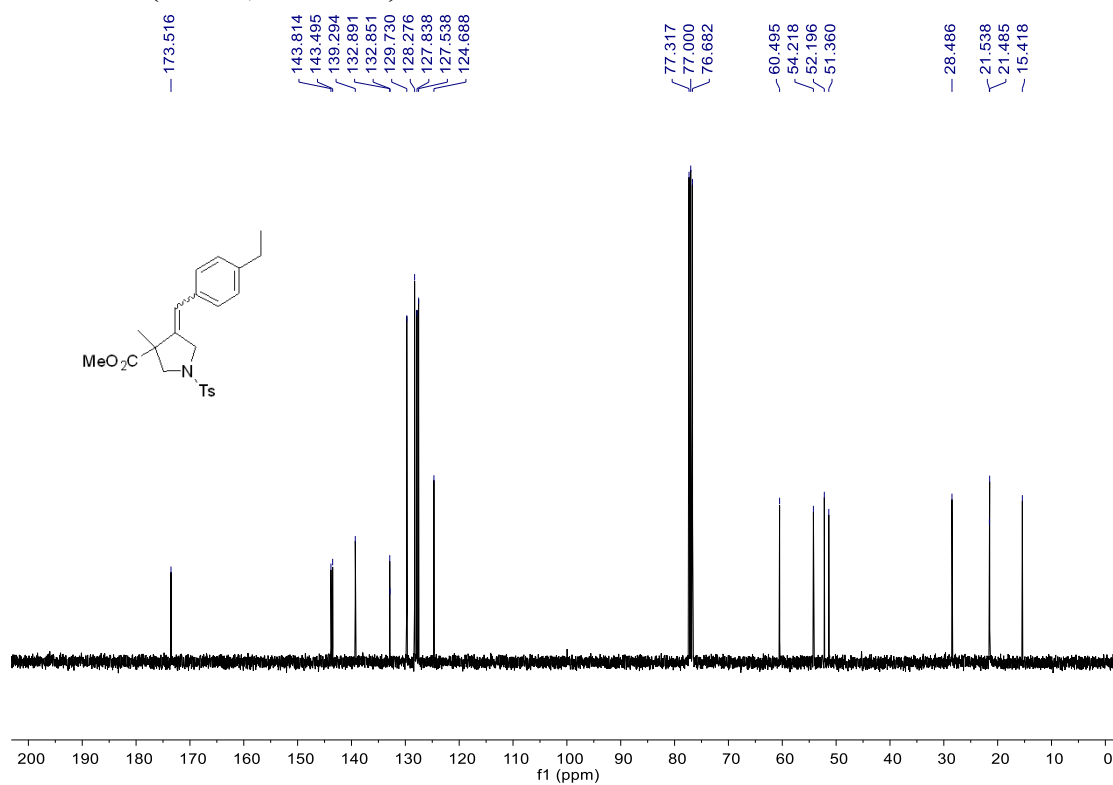

(4g)

$^1\text{H}$  NMR ( $\text{CDCl}_3$ , 400 MHz)

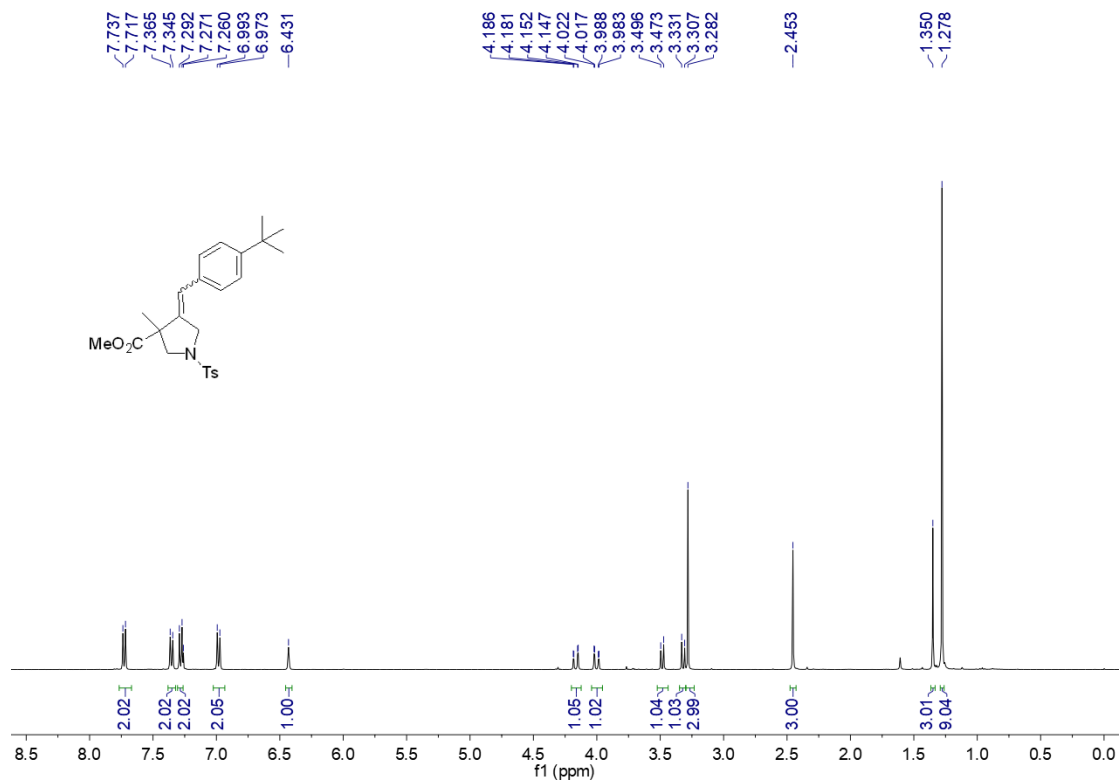

$^{13}\text{C}$  NMR ( $\text{CDCl}_3$ , 101 MHz)

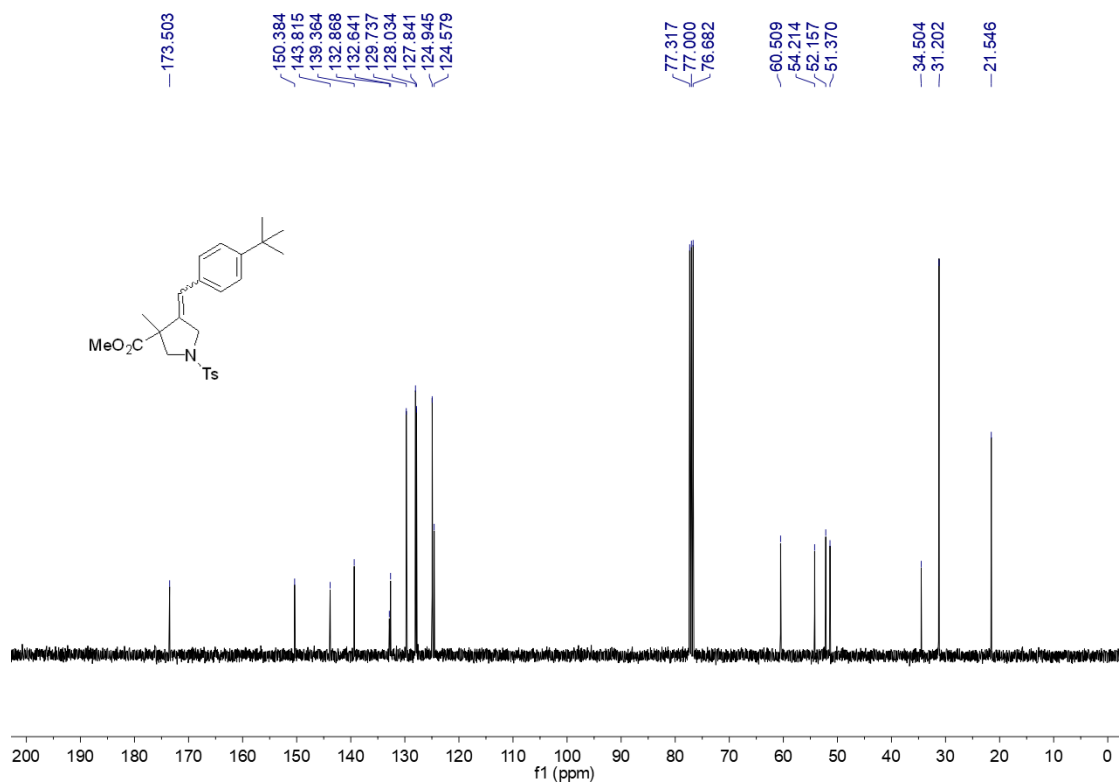

# NOE Experiment (CDCl<sub>3</sub>, 600 MHz)

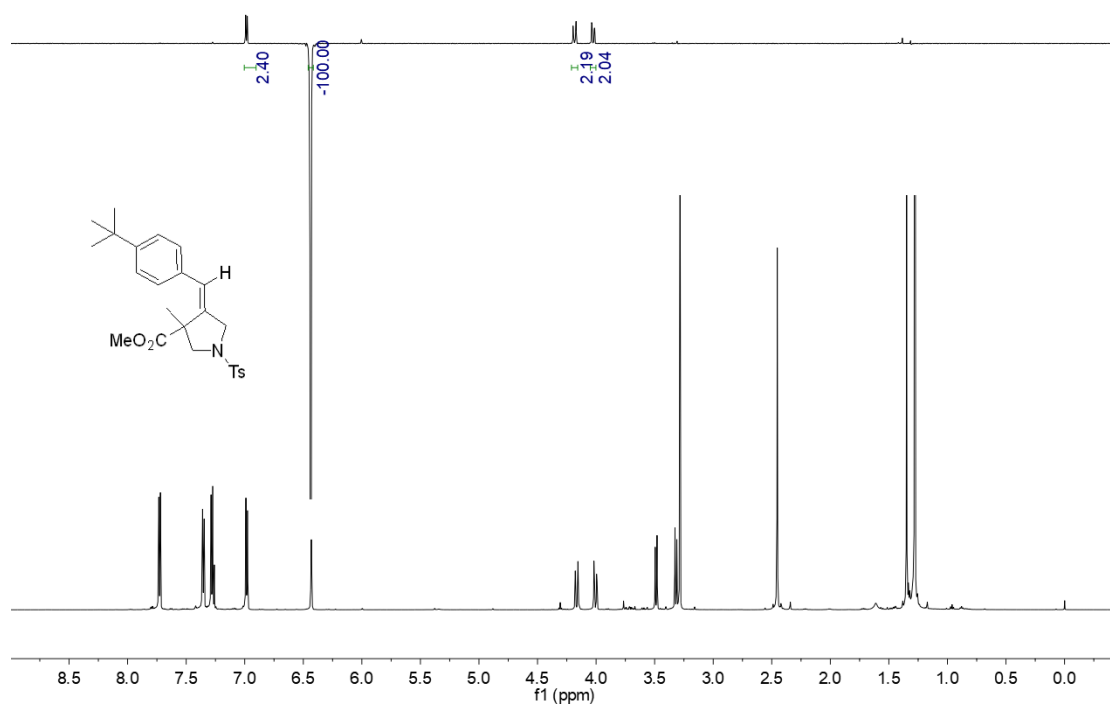

(4h)  
<sup>1</sup>H NMR (CDCl<sub>3</sub>, 400 MHz)

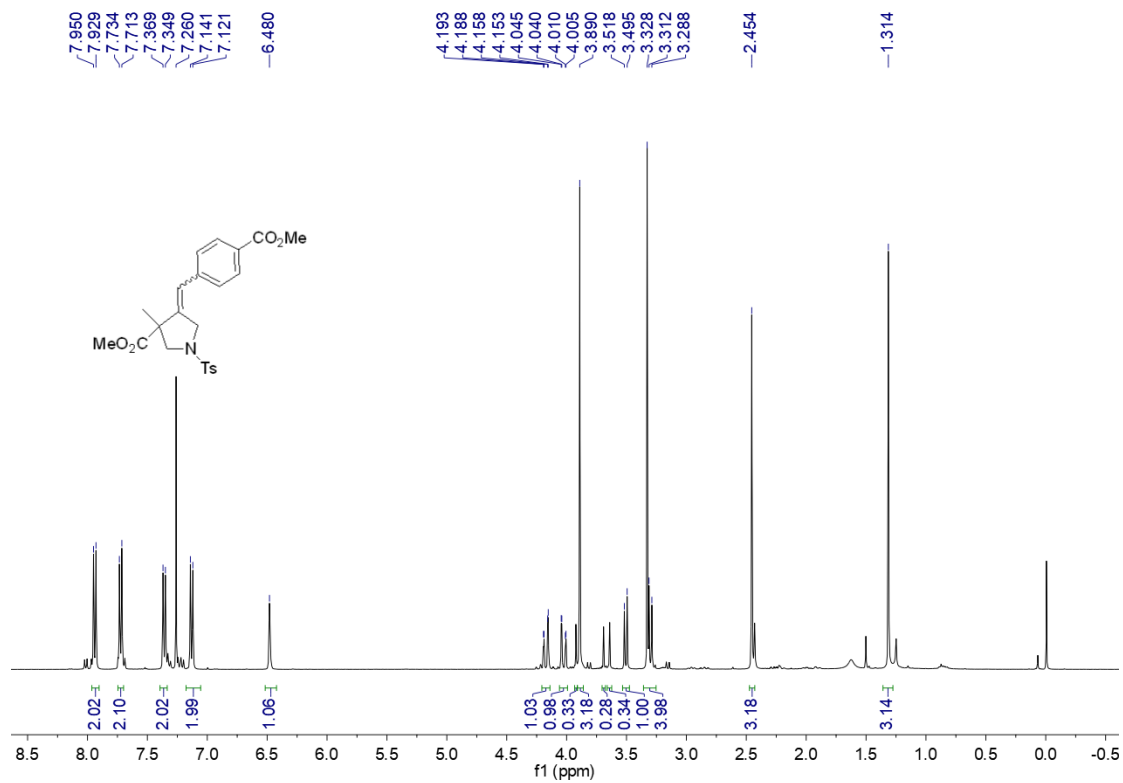

<sup>13</sup>C NMR (CDCl<sub>3</sub>, 101 MHz)

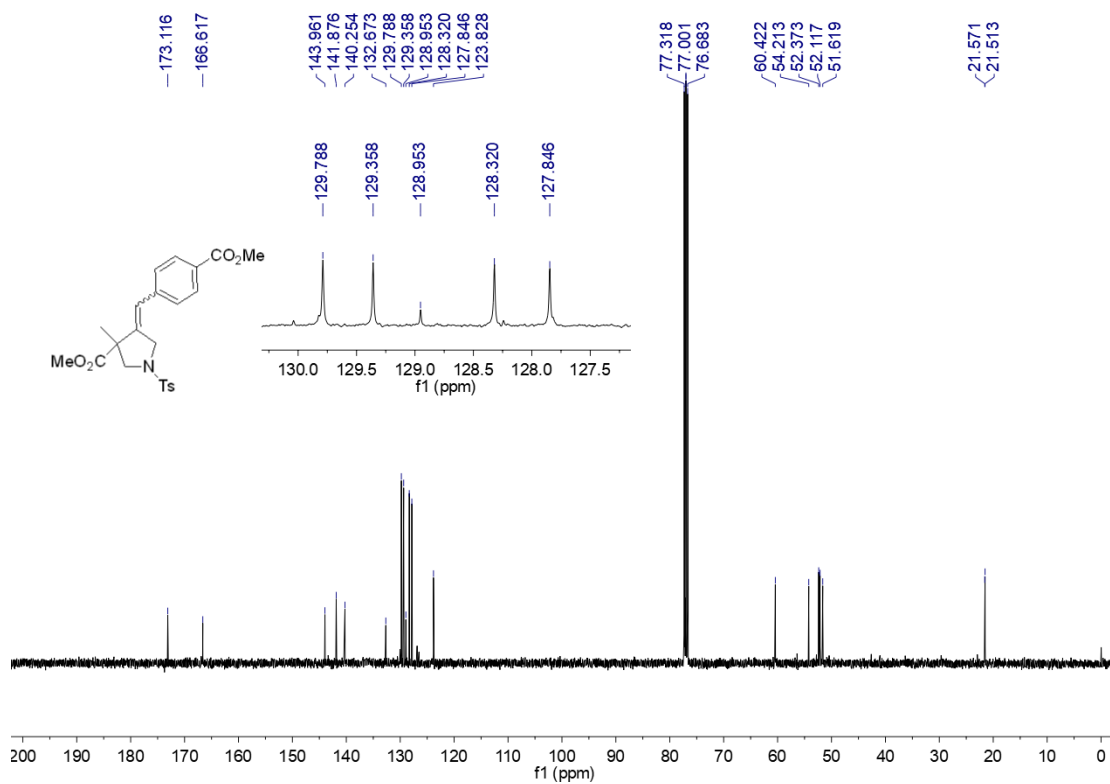

(4i)

<sup>1</sup>H NMR (CDCl<sub>3</sub>, 400 MHz)

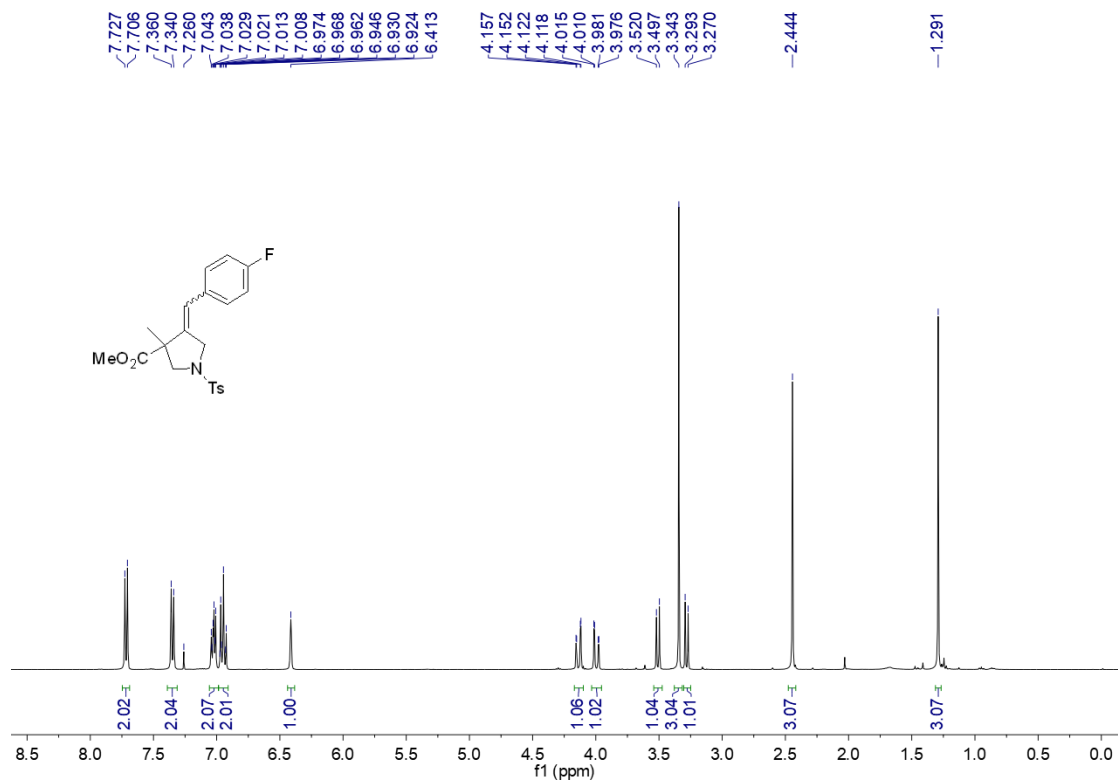

<sup>13</sup>C NMR (CDCl<sub>3</sub>, 101 MHz)

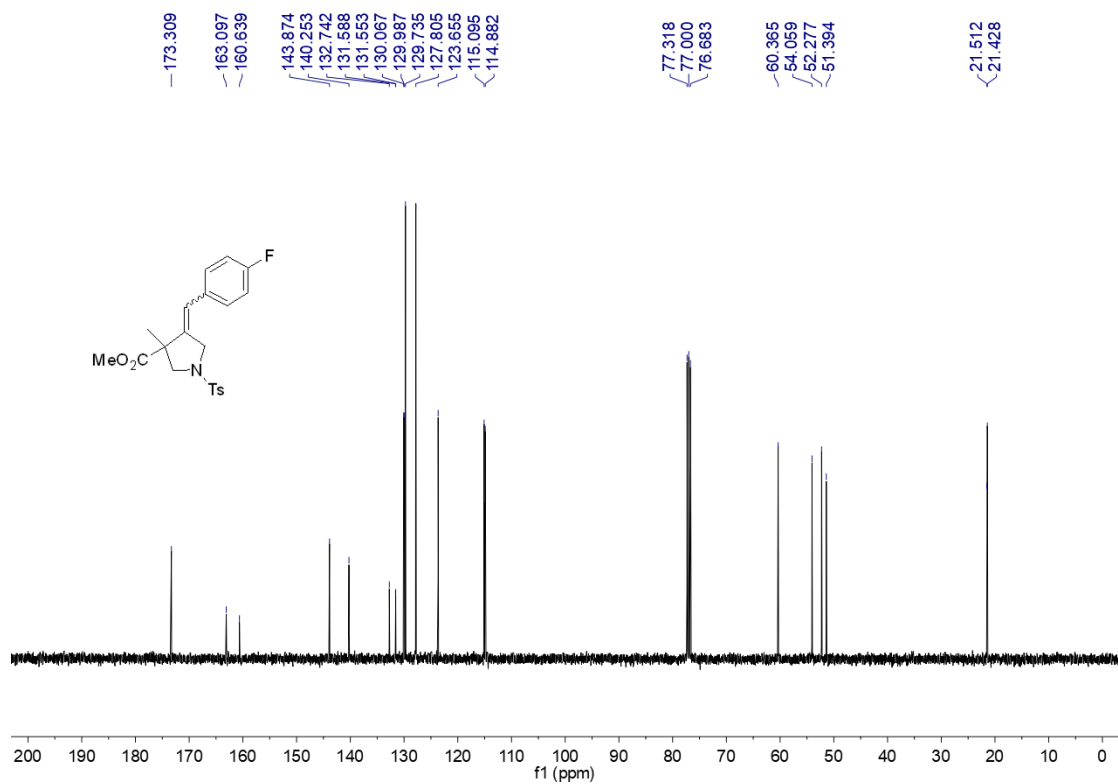



**$^{19}\text{F}$  NMR (CDCl<sub>3</sub>, 376 MHz)**

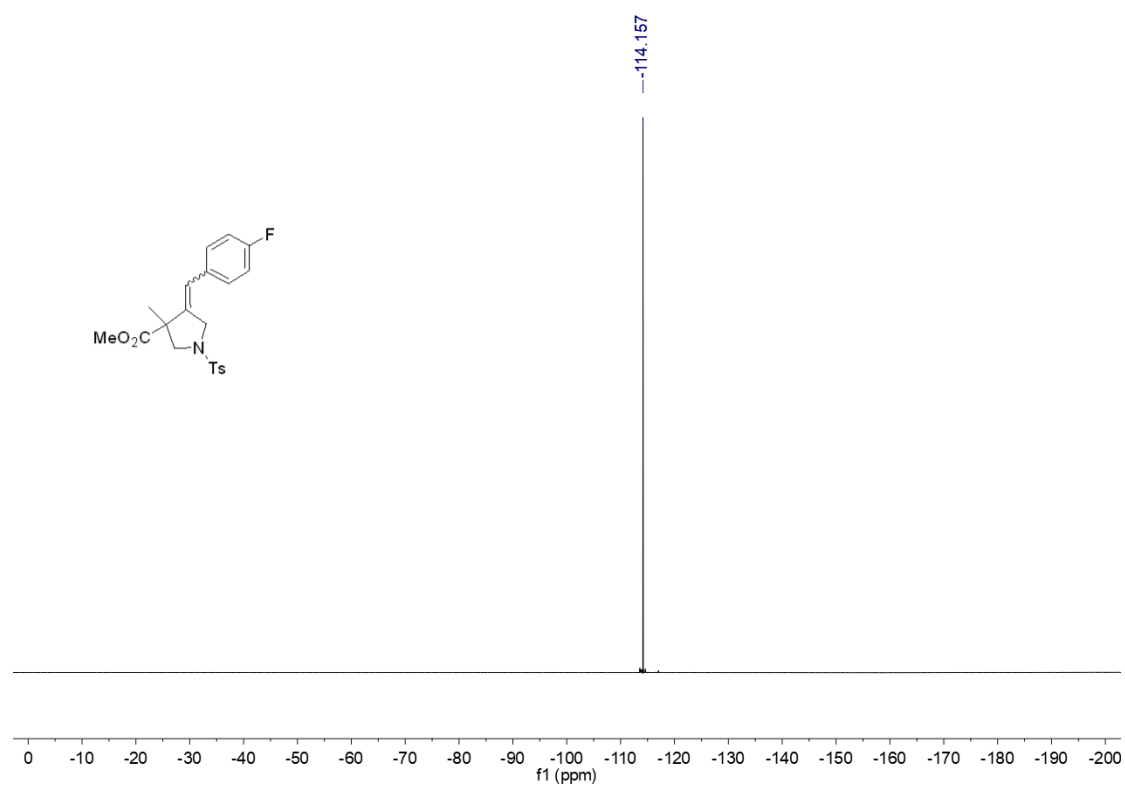

(4j)  
<sup>1</sup>H NMR (CDCl<sub>3</sub>, 400 MHz)

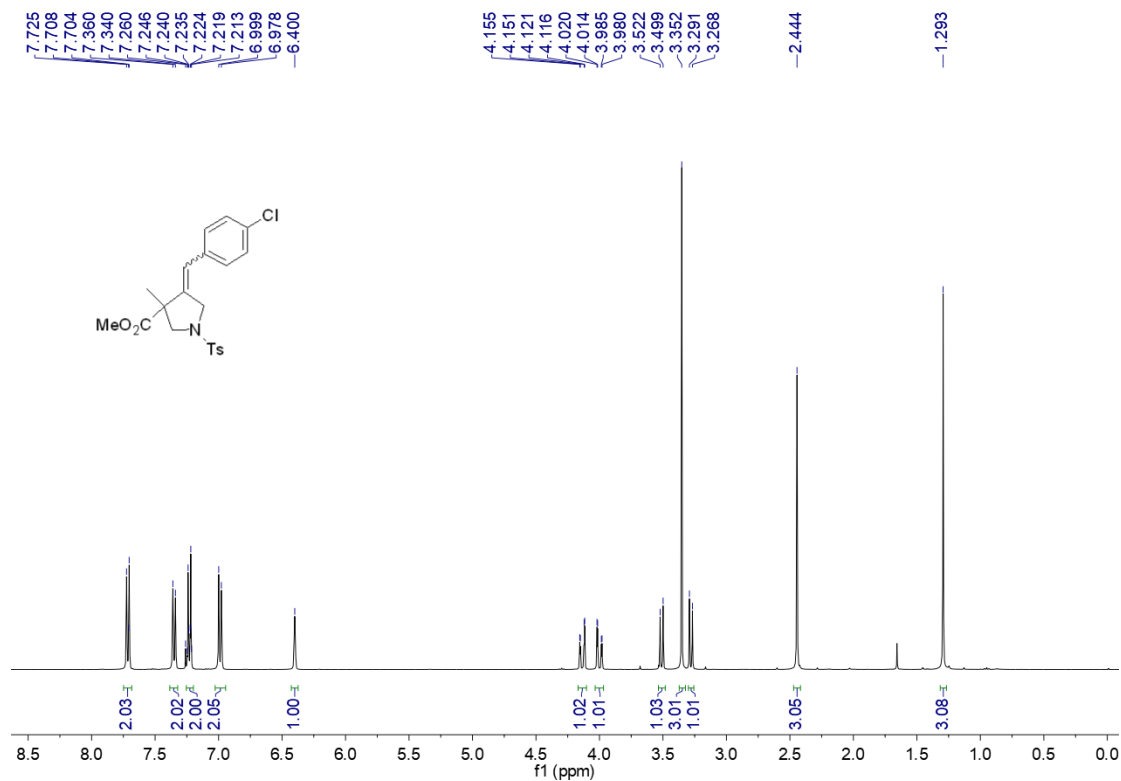

<sup>13</sup>C NMR (CDCl<sub>3</sub>, 101 MHz)

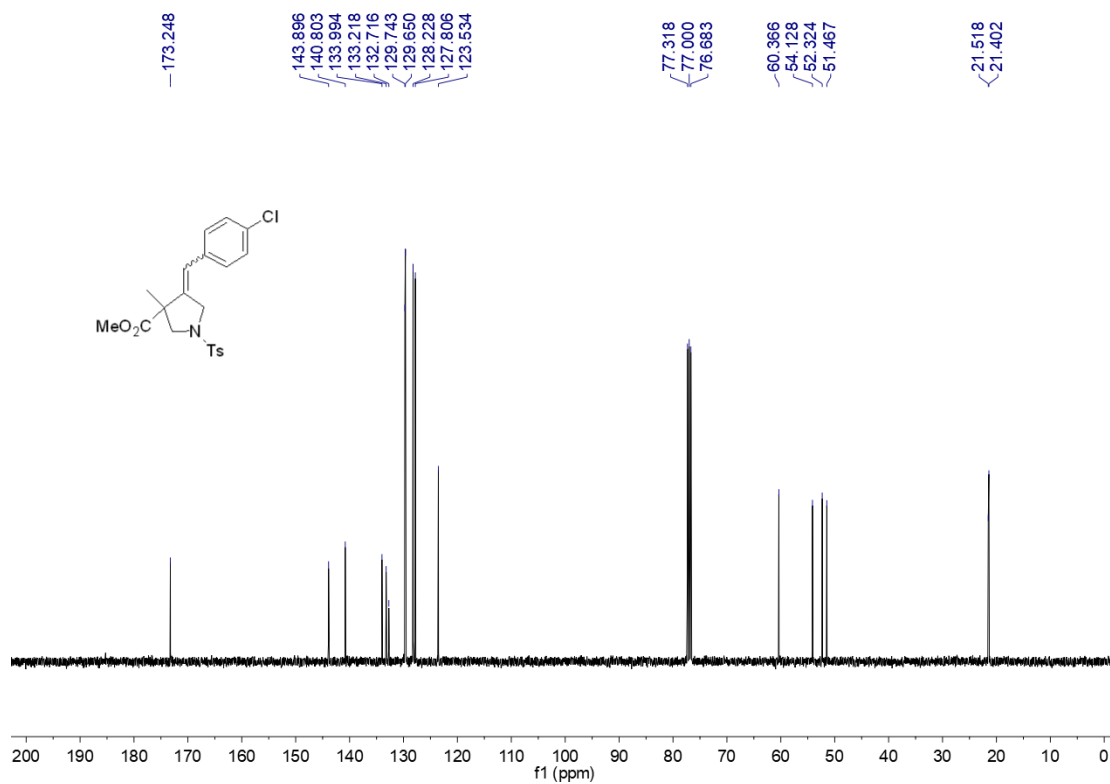

(4k)  
<sup>1</sup>H NMR (CDCl<sub>3</sub>, 400 MHz)

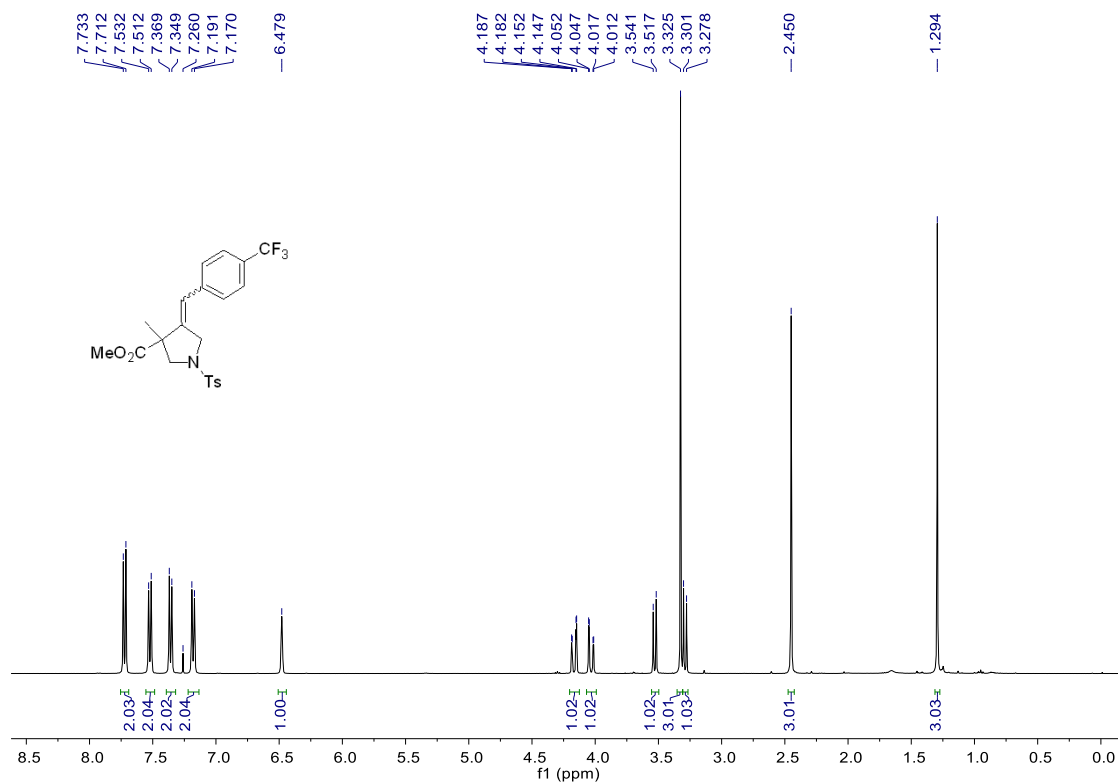

<sup>13</sup>C NMR (CDCl<sub>3</sub>, 101 MHz)

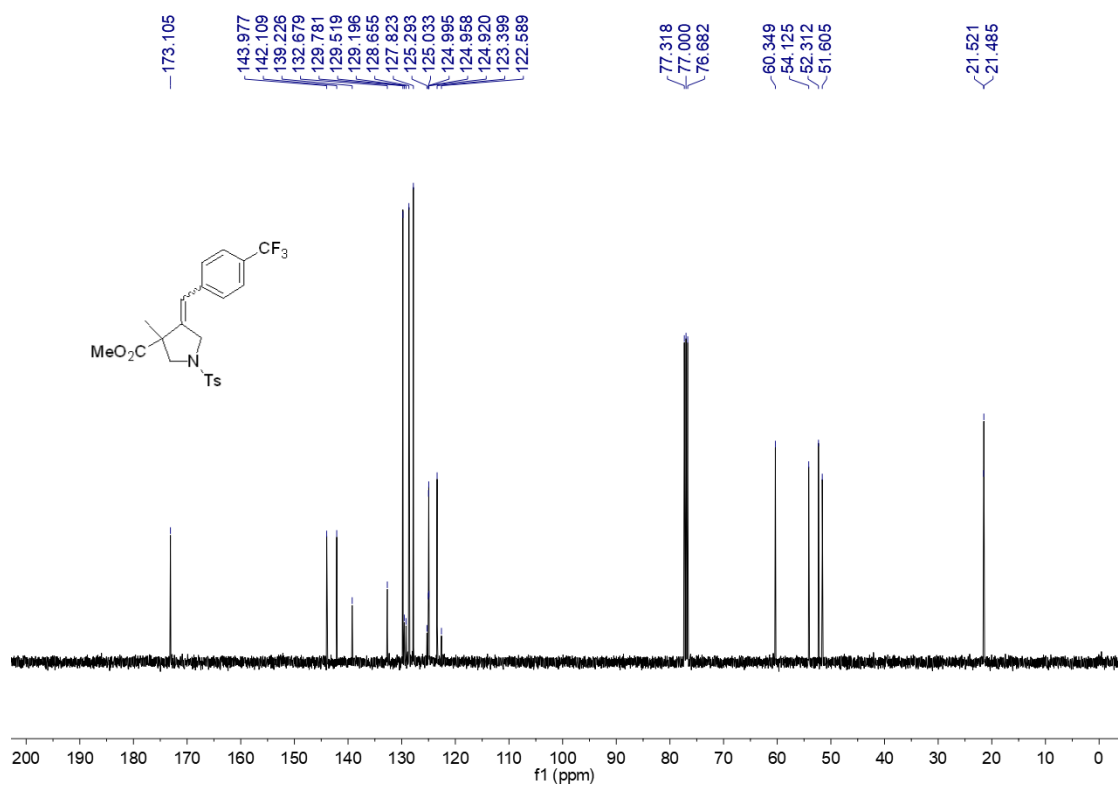

**$^{19}\text{F}$  NMR (CDCl<sub>3</sub>, 376 MHz)**

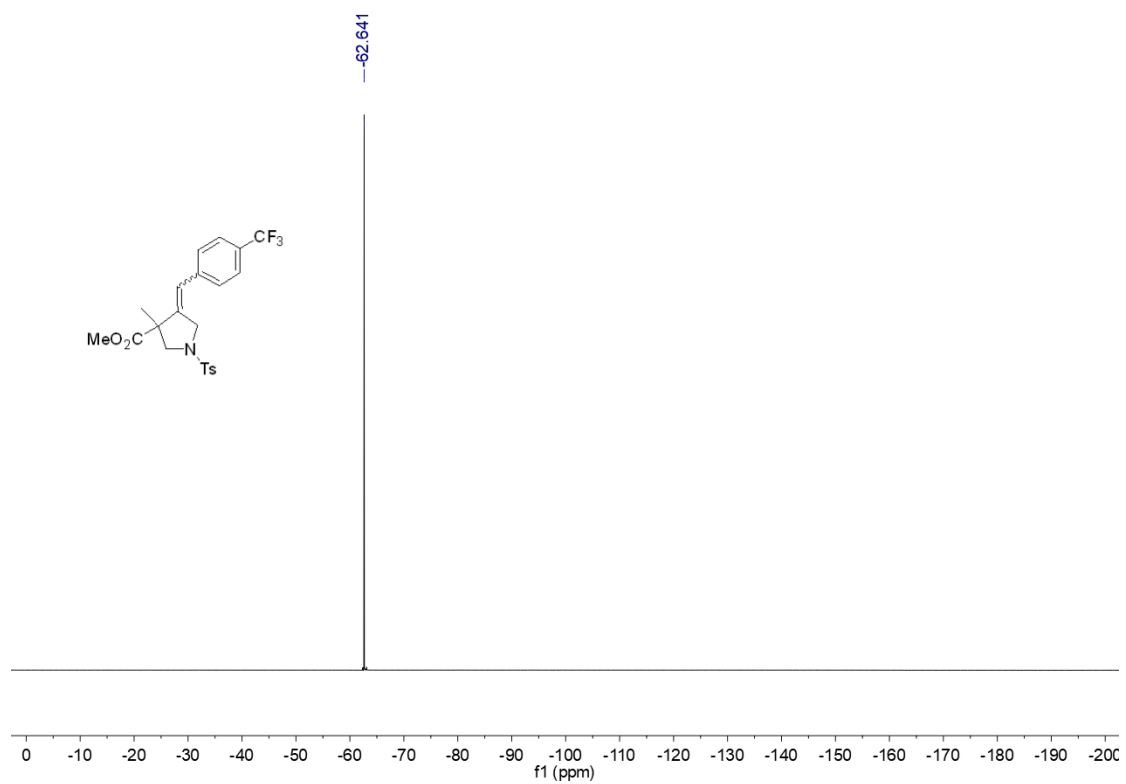

(41)  
<sup>1</sup>H NMR (CDCl<sub>3</sub>, 400 MHz)

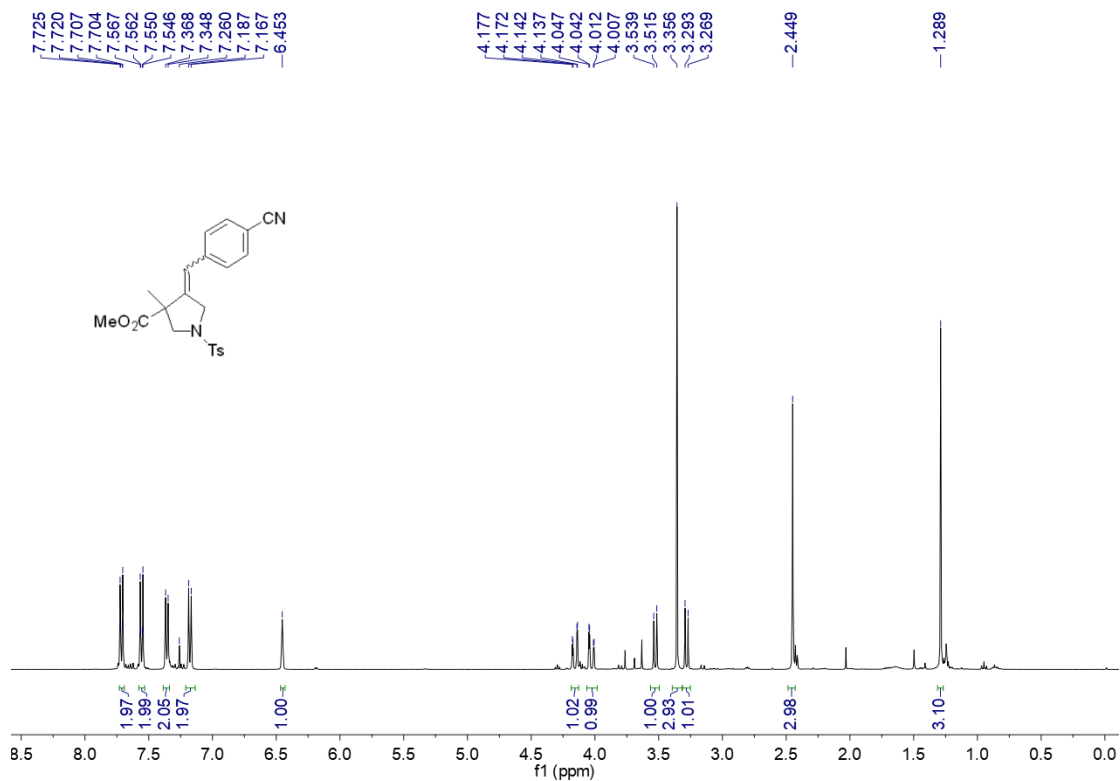

<sup>13</sup>C NMR (CDCl<sub>3</sub>, 101 MHz)

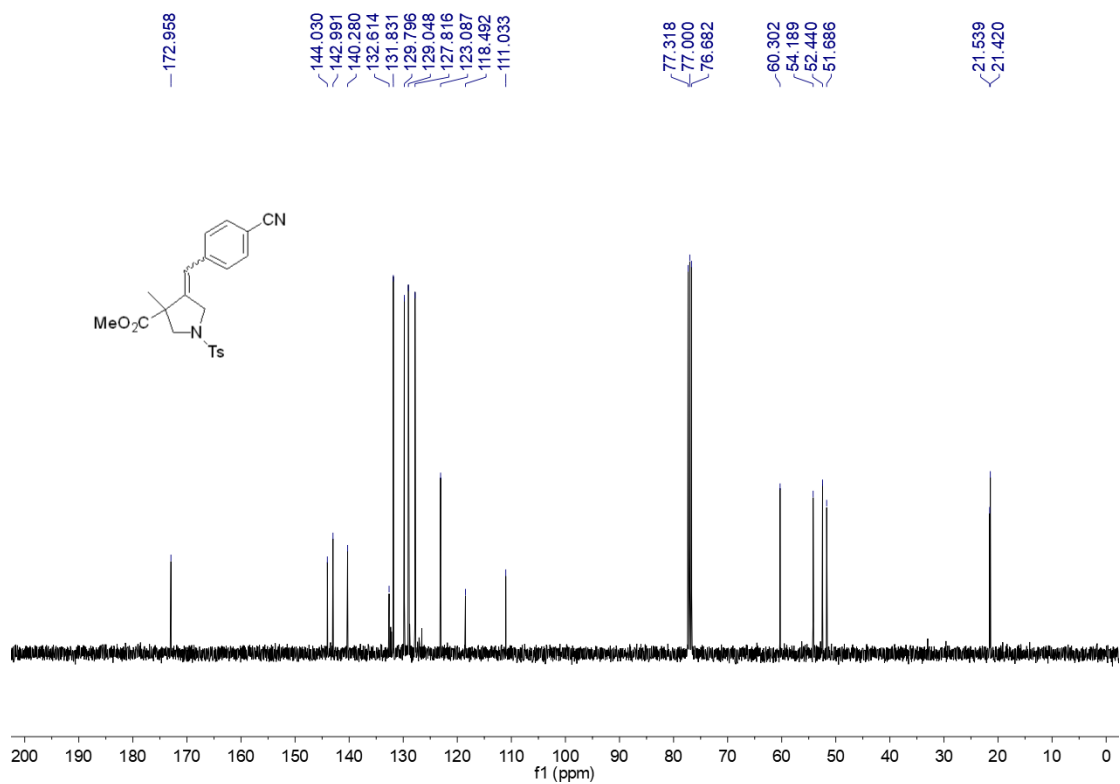

(4m)

$^1\text{H}$  NMR ( $\text{CDCl}_3$ , 400 MHz)

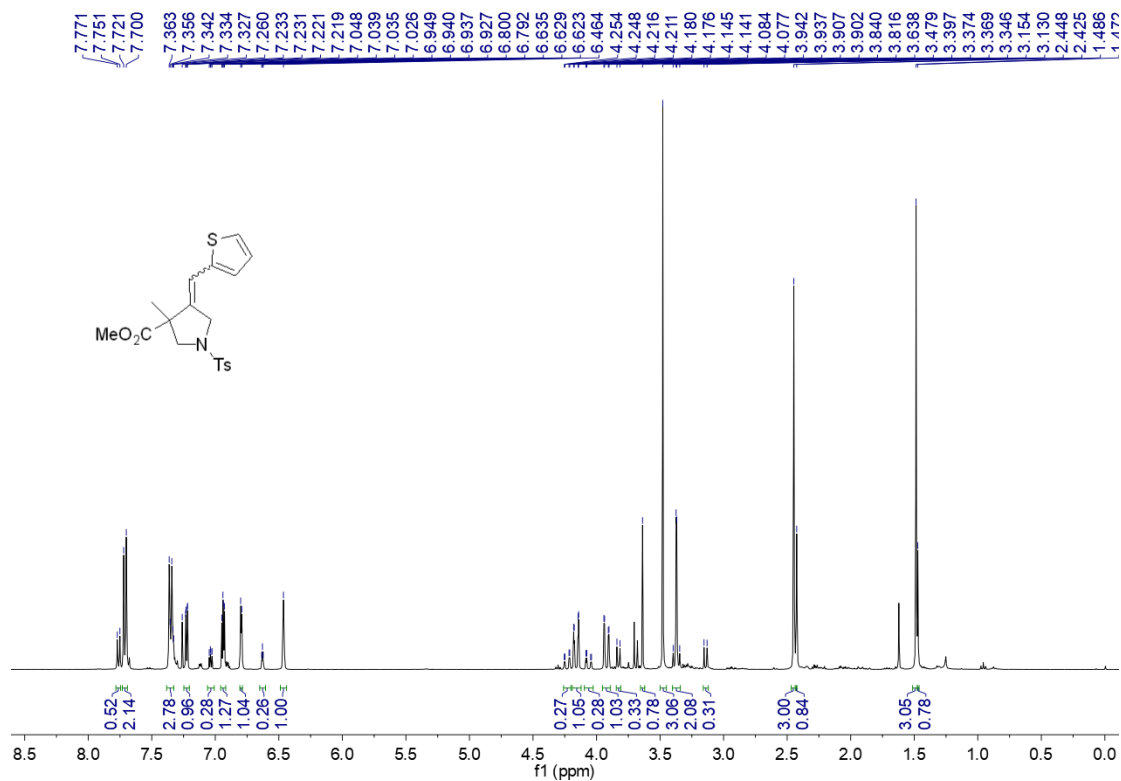

$^{13}\text{C}$  NMR ( $\text{CDCl}_3$ , 101 MHz)

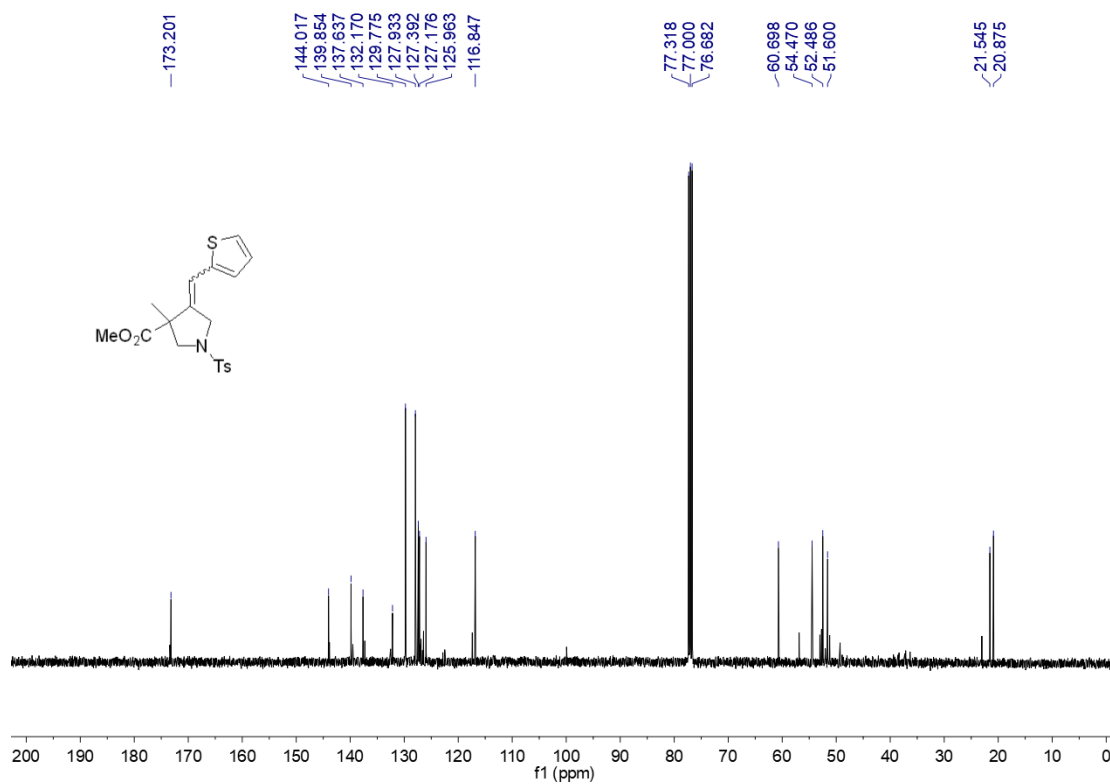

(4n)

$^1\text{H}$  NMR ( $\text{CDCl}_3$ , 400 MHz)

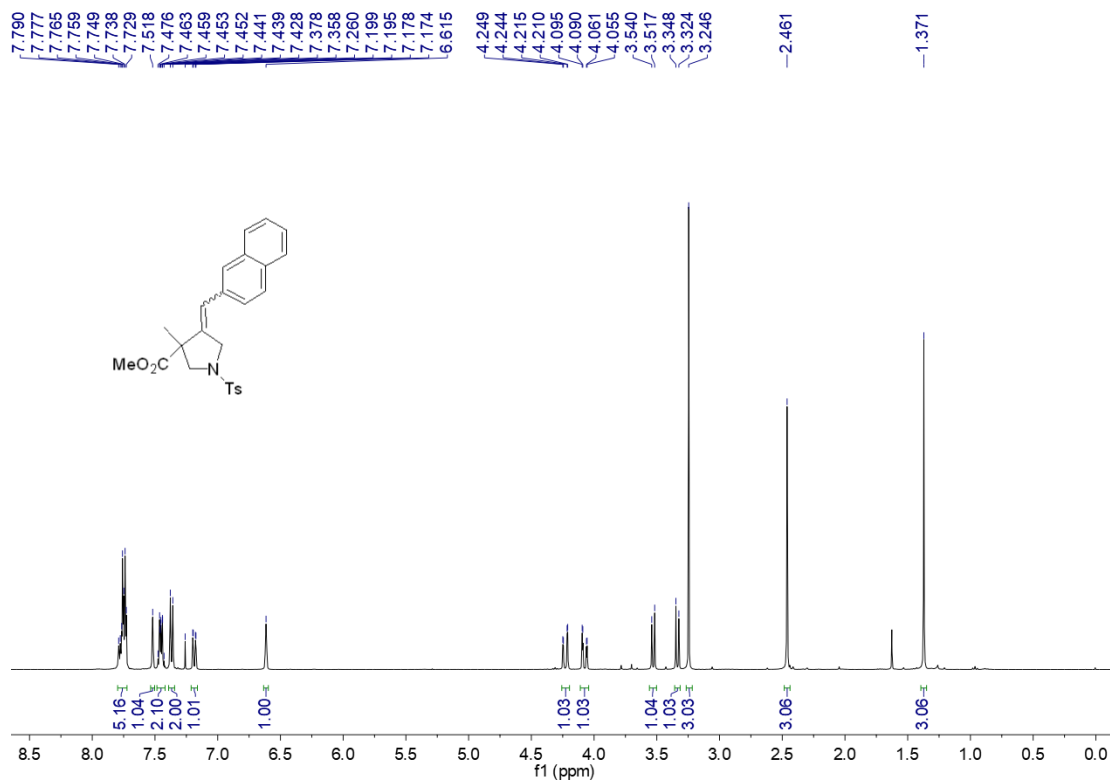

$^{13}\text{C}$  NMR ( $\text{CDCl}_3$ , 101 MHz)

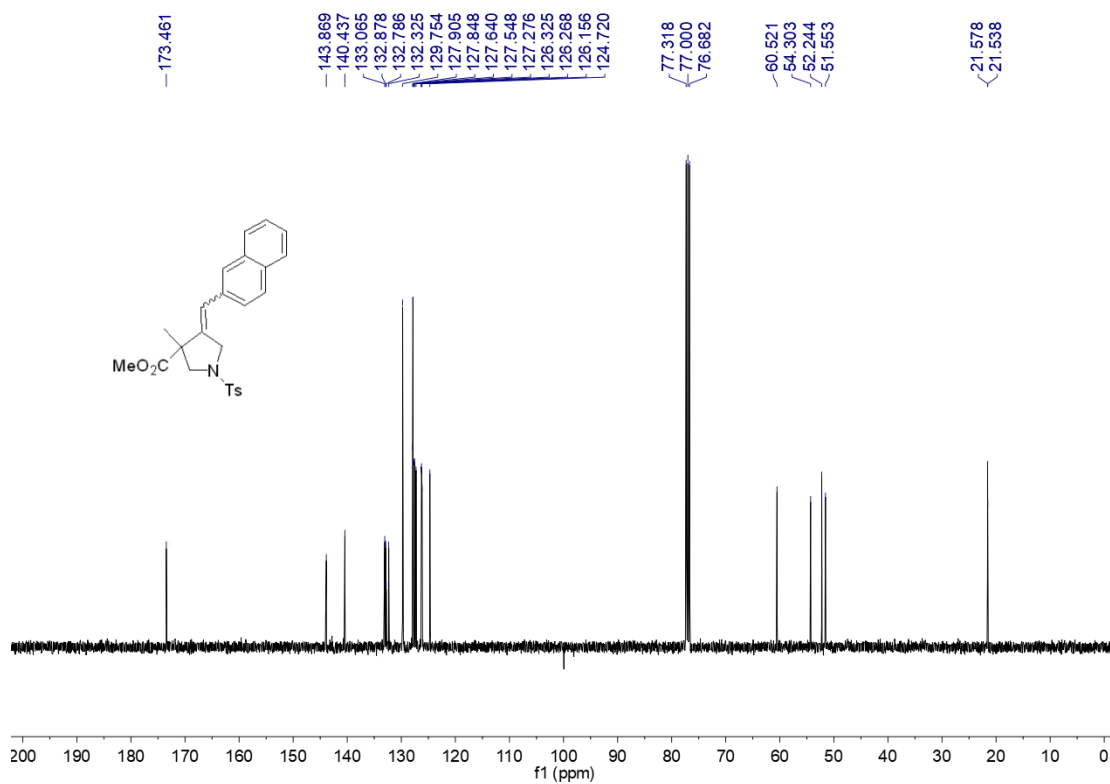

(4o)

$^1\text{H}$  NMR ( $\text{CDCl}_3$ , 400 MHz)

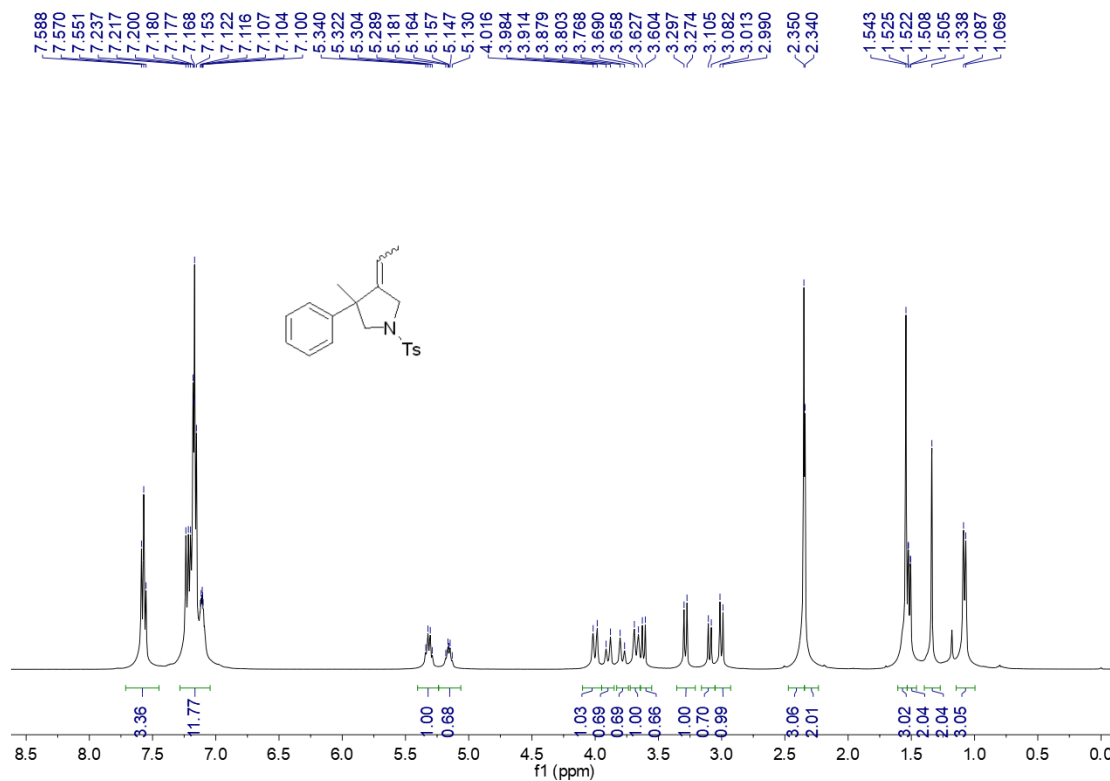

$^{13}\text{C}$  NMR ( $\text{CDCl}_3$ , 101 MHz)

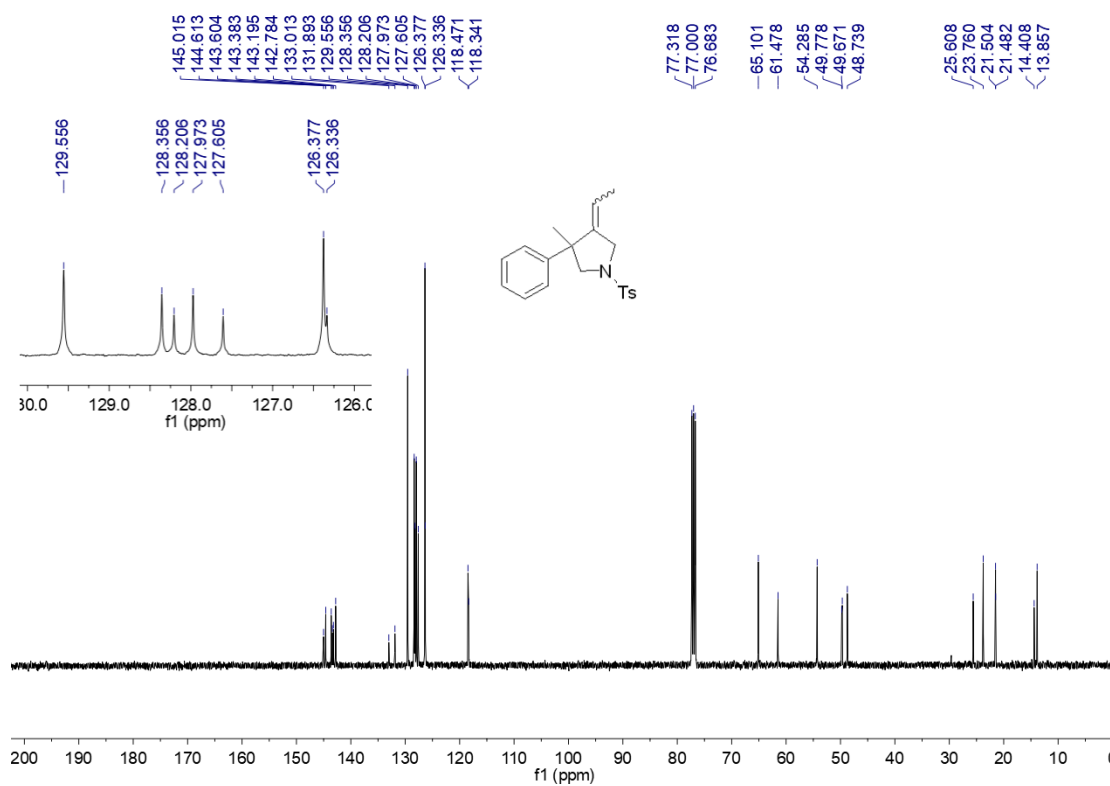



**(4p)**  
<sup>1</sup>H NMR (CDCl<sub>3</sub>, 400 MHz)

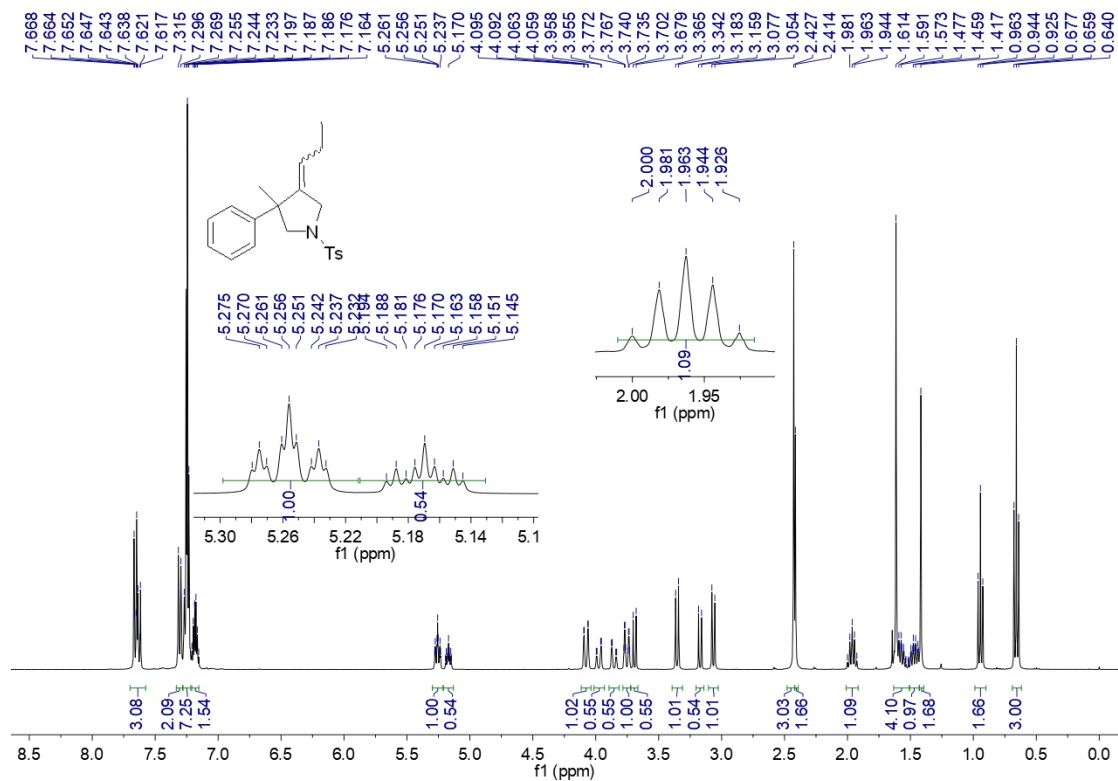

<sup>13</sup>C NMR (CDCl<sub>3</sub>, 101 MHz)

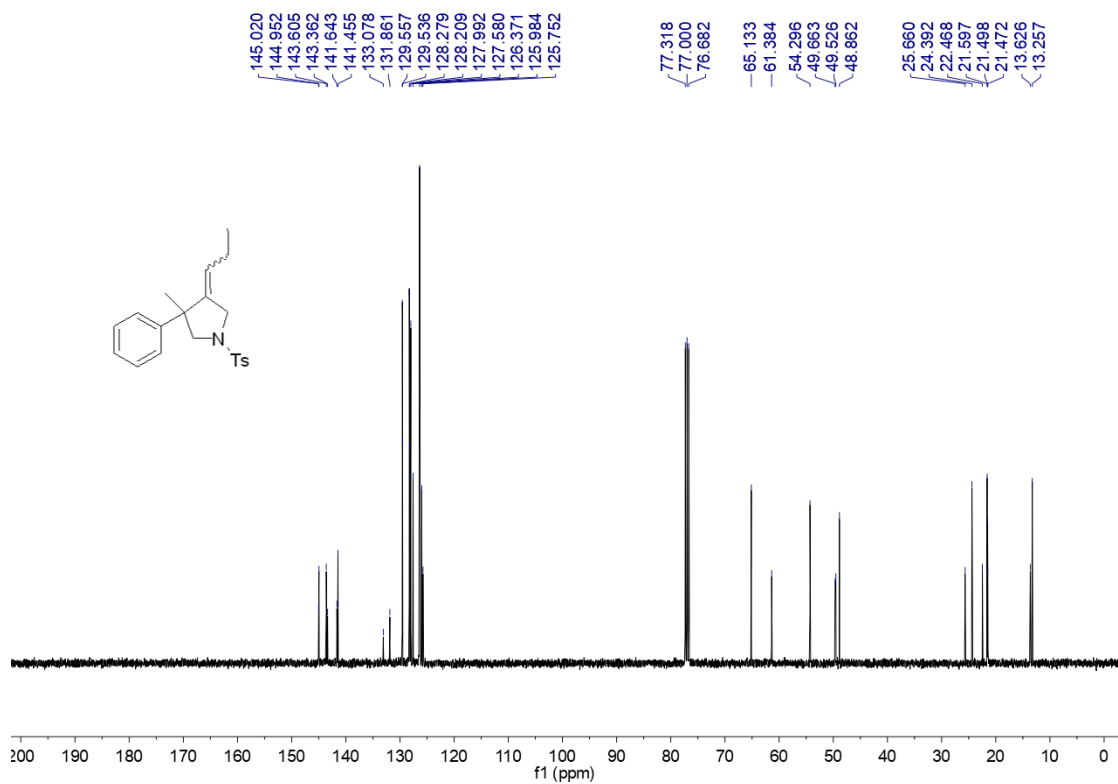

(4q)

$^1\text{H}$  NMR ( $\text{CDCl}_3$ , 400 MHz)

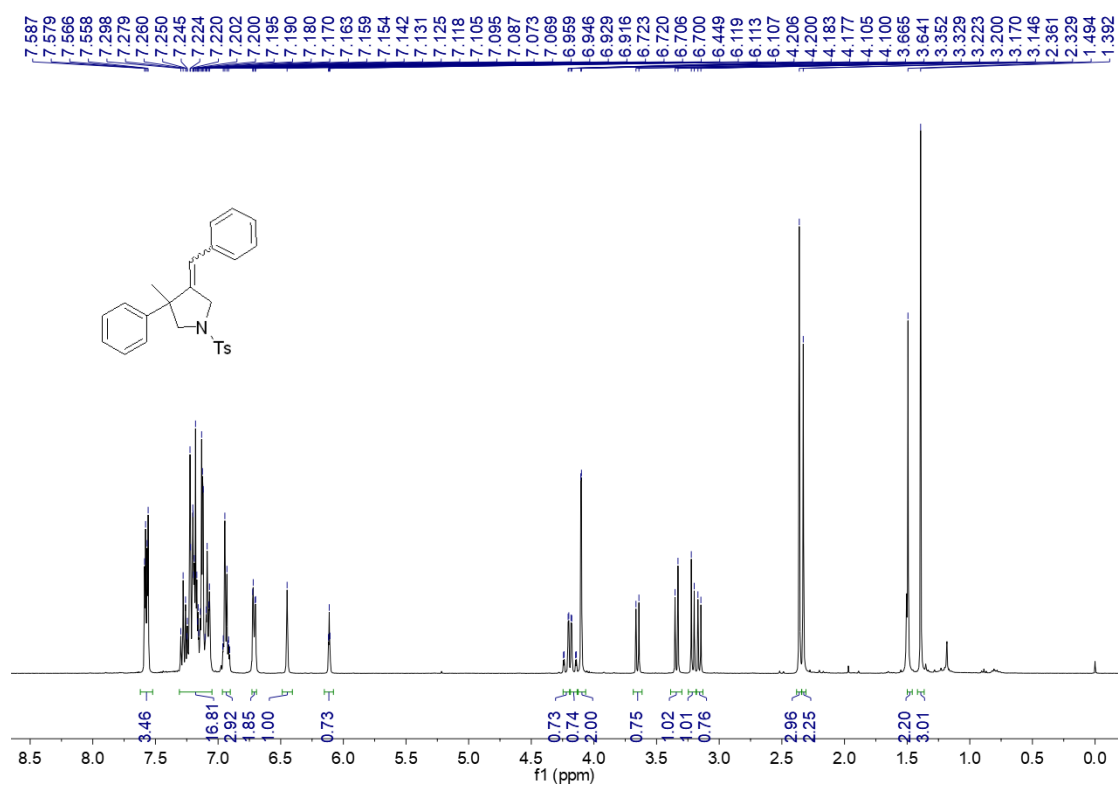

$^{13}\text{C}$  NMR ( $\text{CDCl}_3$ , 101 MHz)

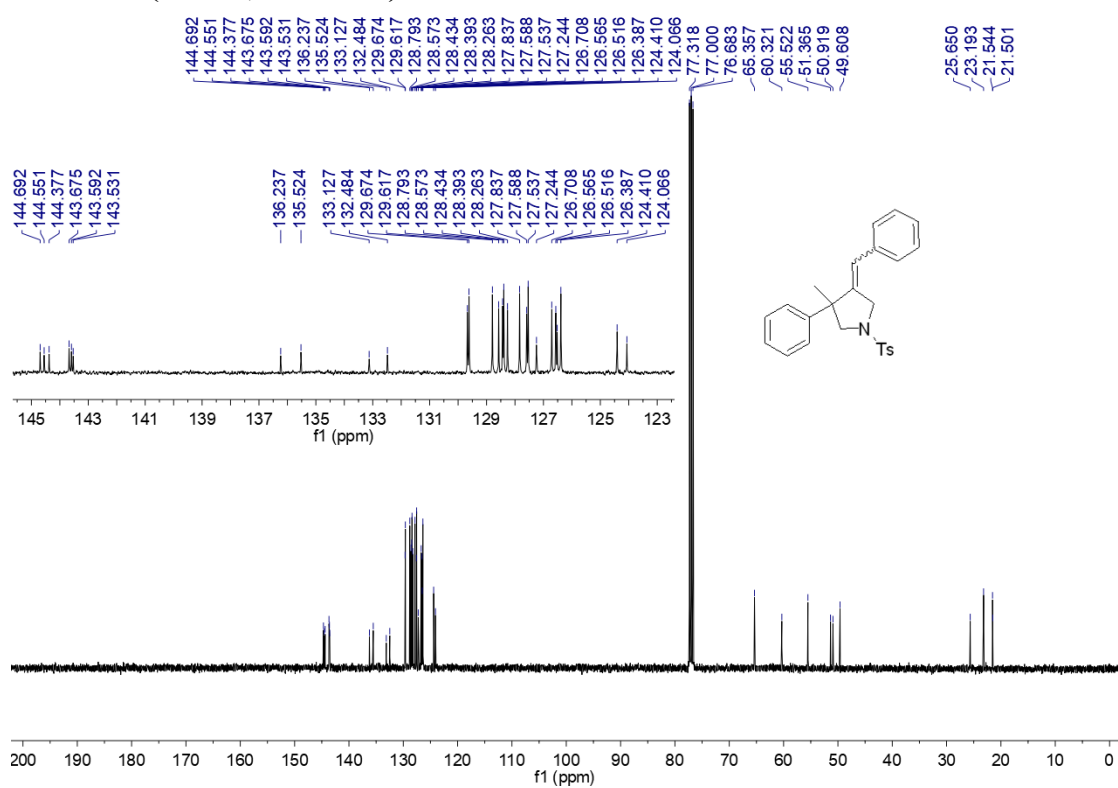

**(4r)**  
<sup>1</sup>H NMR (CDCl<sub>3</sub>, 400 MHz)

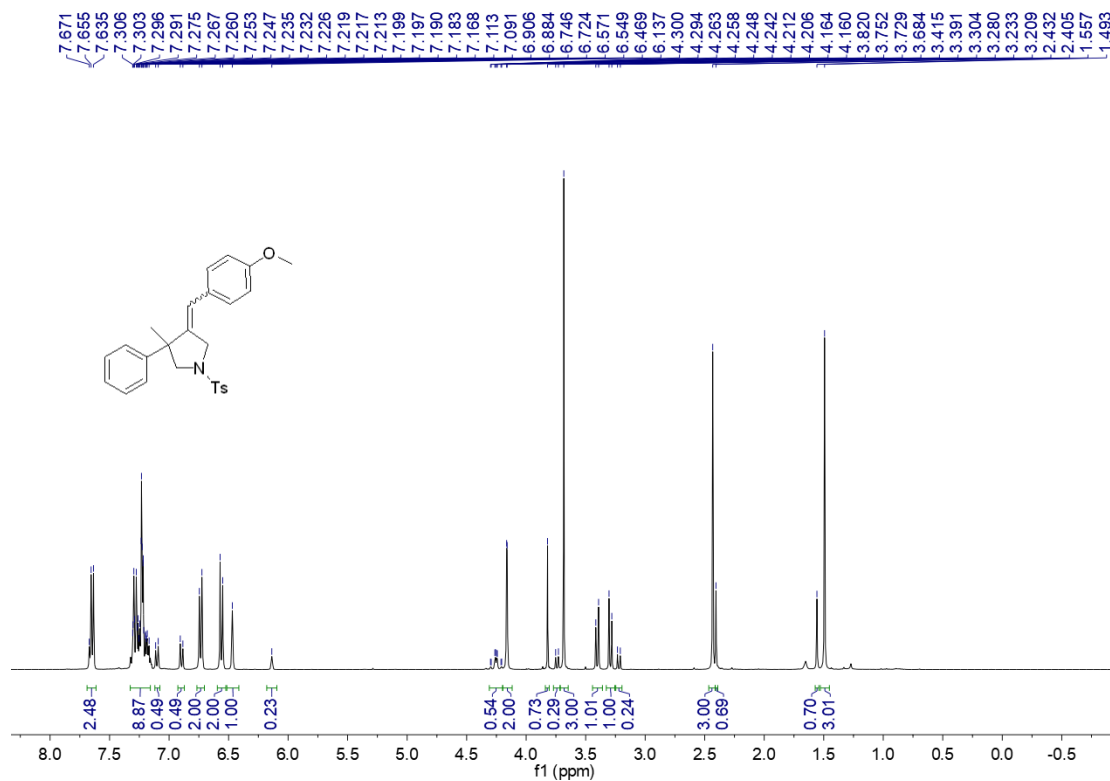

<sup>13</sup>C NMR (CDCl<sub>3</sub>, 101 MHz)

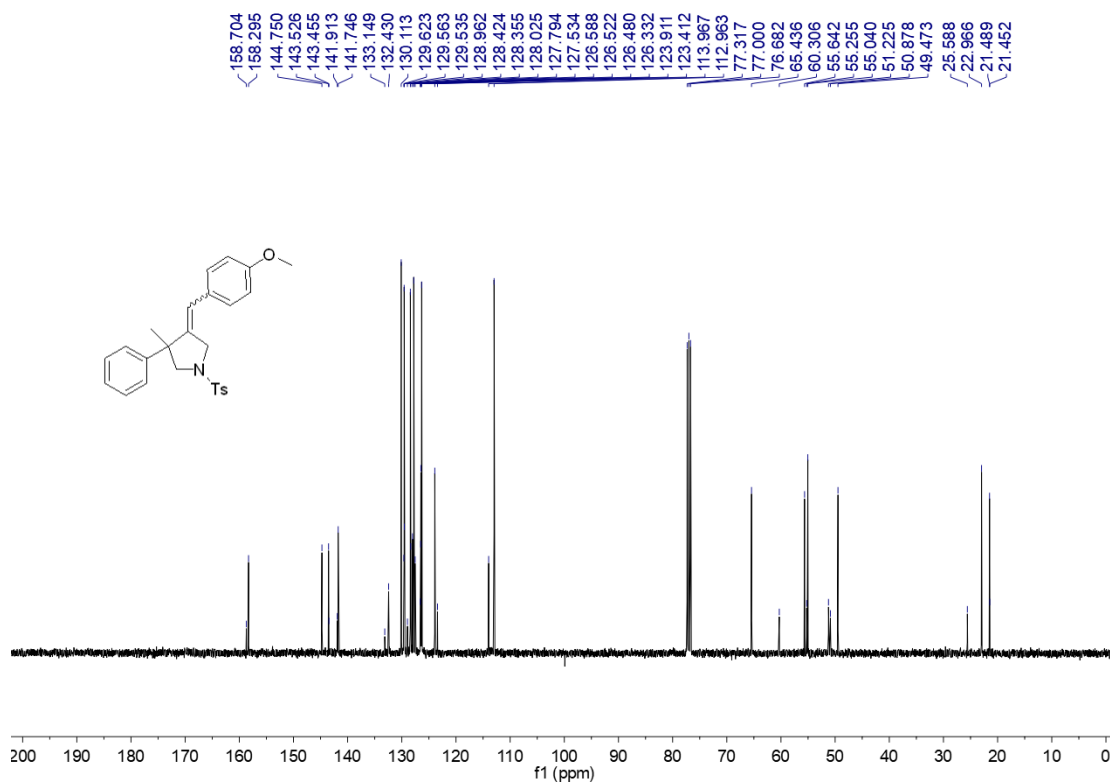

(4s)

$^1\text{H}$  NMR ( $\text{CDCl}_3$ , 400 MHz)

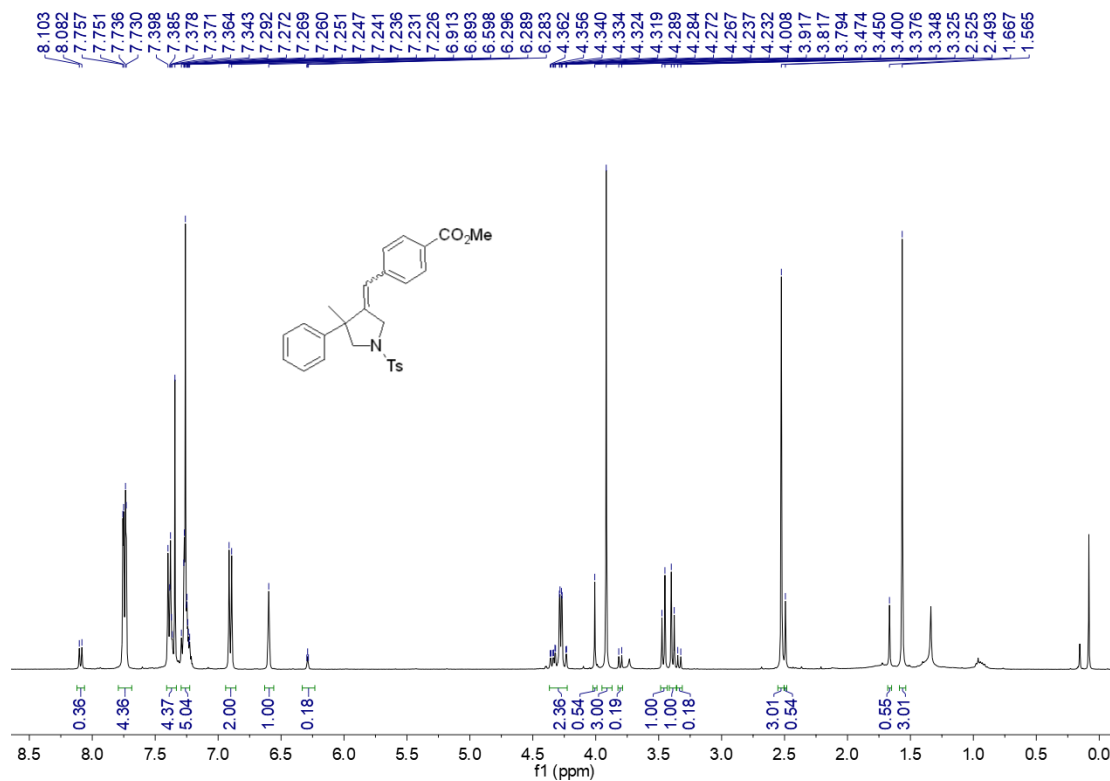

$^{13}\text{C}$  NMR ( $\text{CDCl}_3$ , 101 MHz)

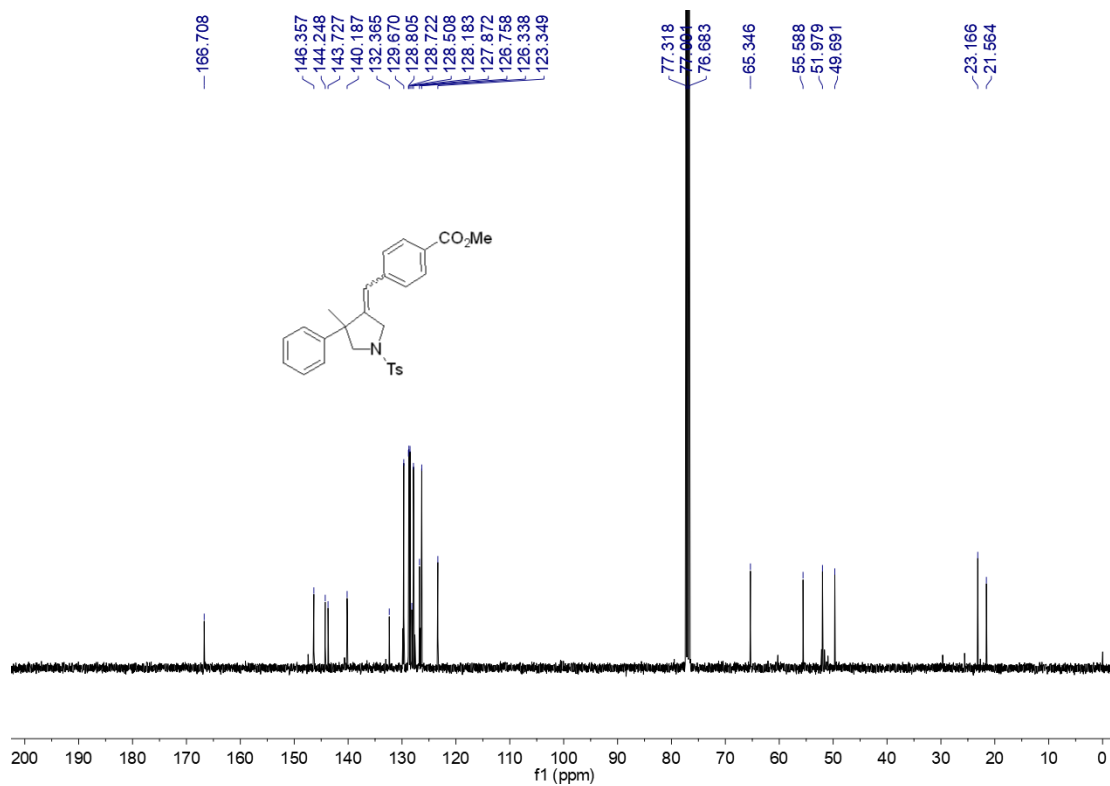

(4t)

$^1\text{H}$  NMR ( $\text{CDCl}_3$ , 400 MHz)

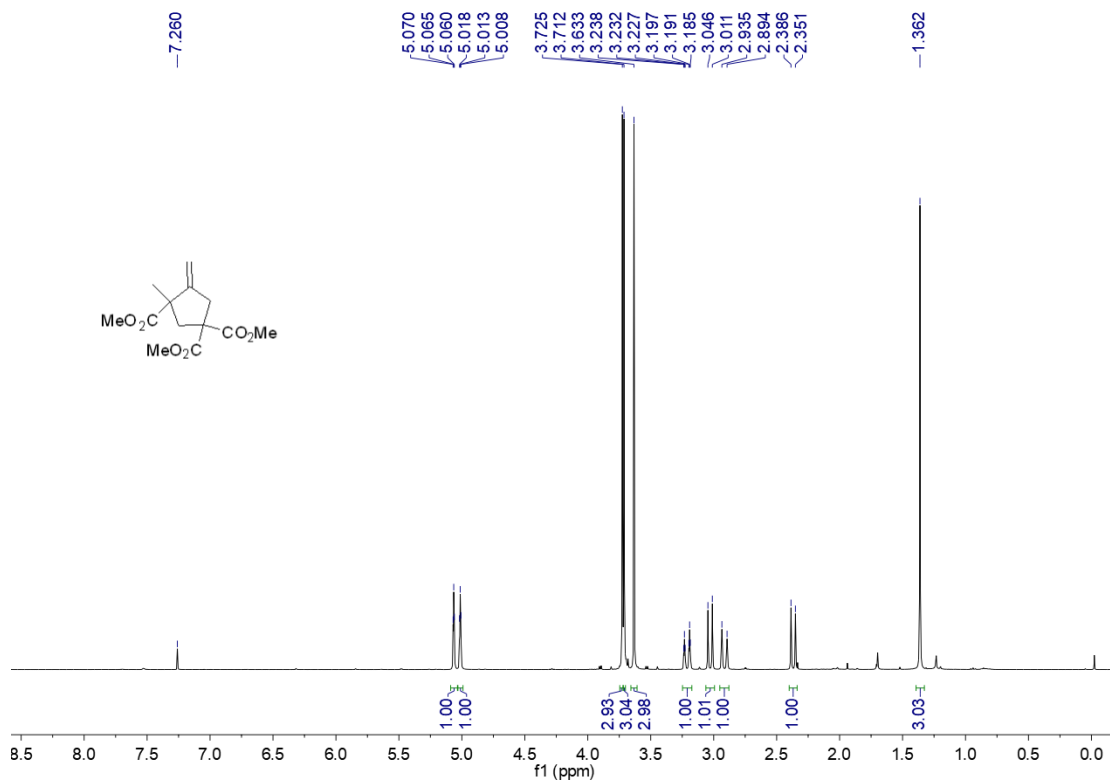

$^{13}\text{C}$  NMR ( $\text{CDCl}_3$ , 101 MHz)

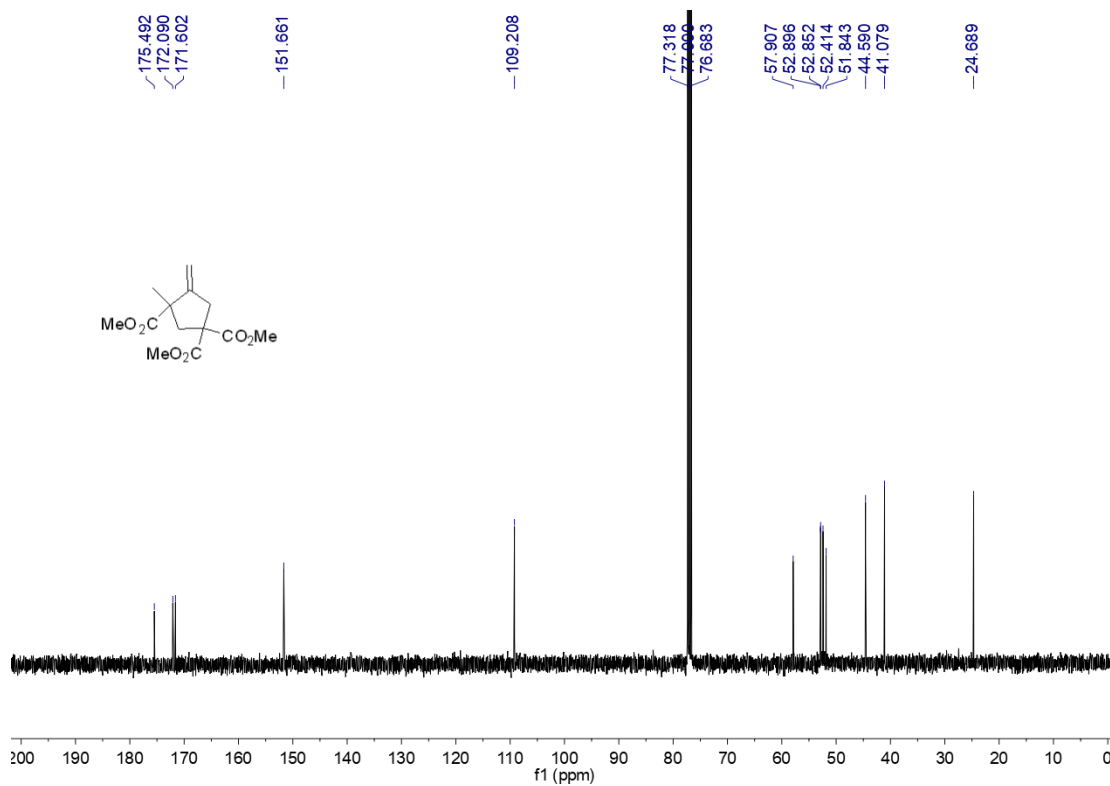

(4u)

$^1\text{H}$  NMR ( $\text{CDCl}_3$ , 400 MHz)

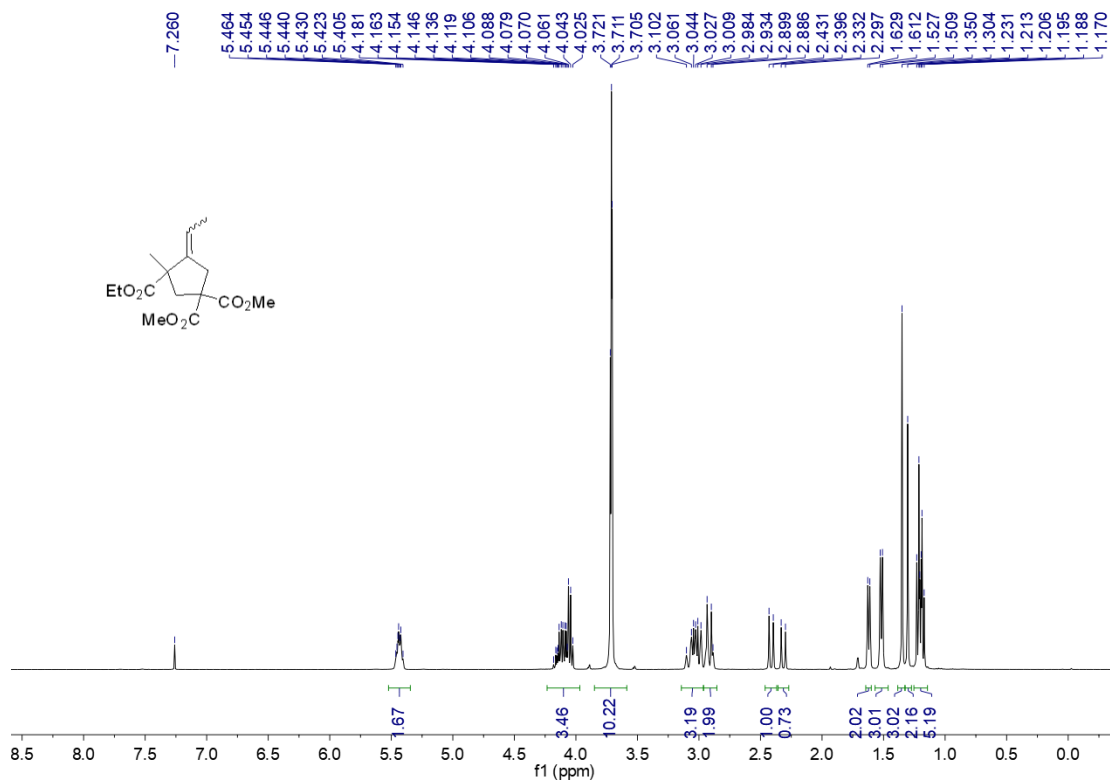

$^{13}\text{C}$  NMR ( $\text{CDCl}_3$ , 101 MHz)

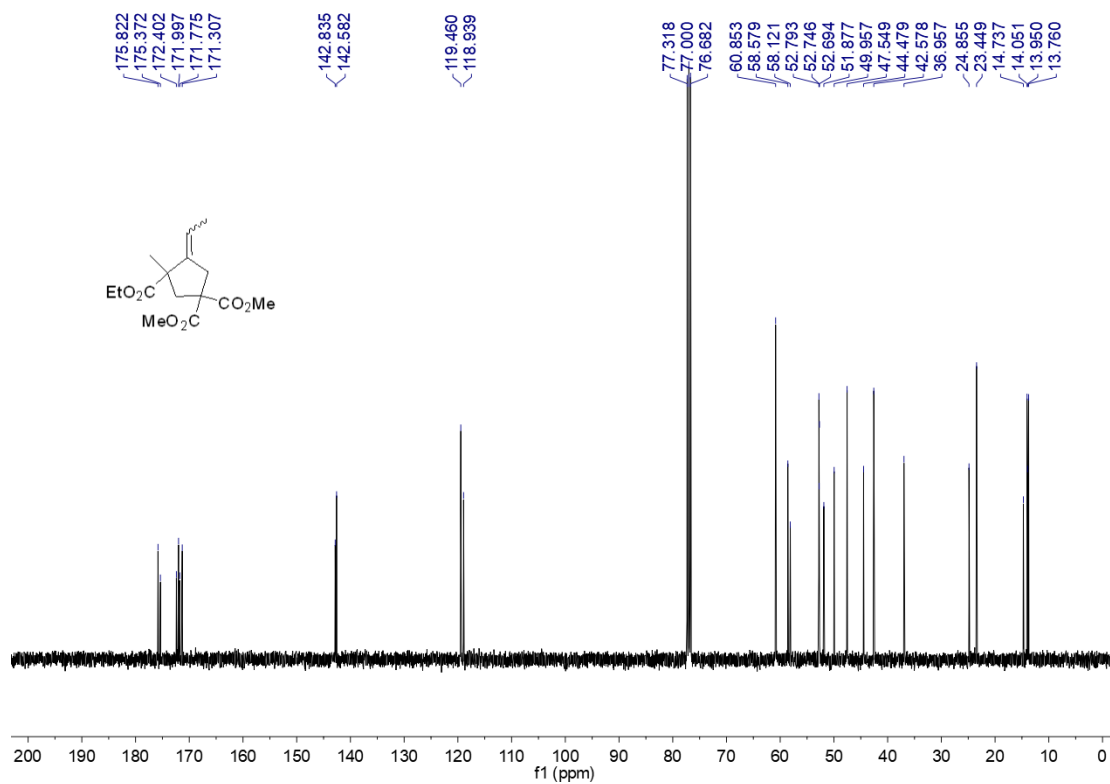

(4v)  
<sup>1</sup>H NMR (CDCl<sub>3</sub>, 400 MHz)

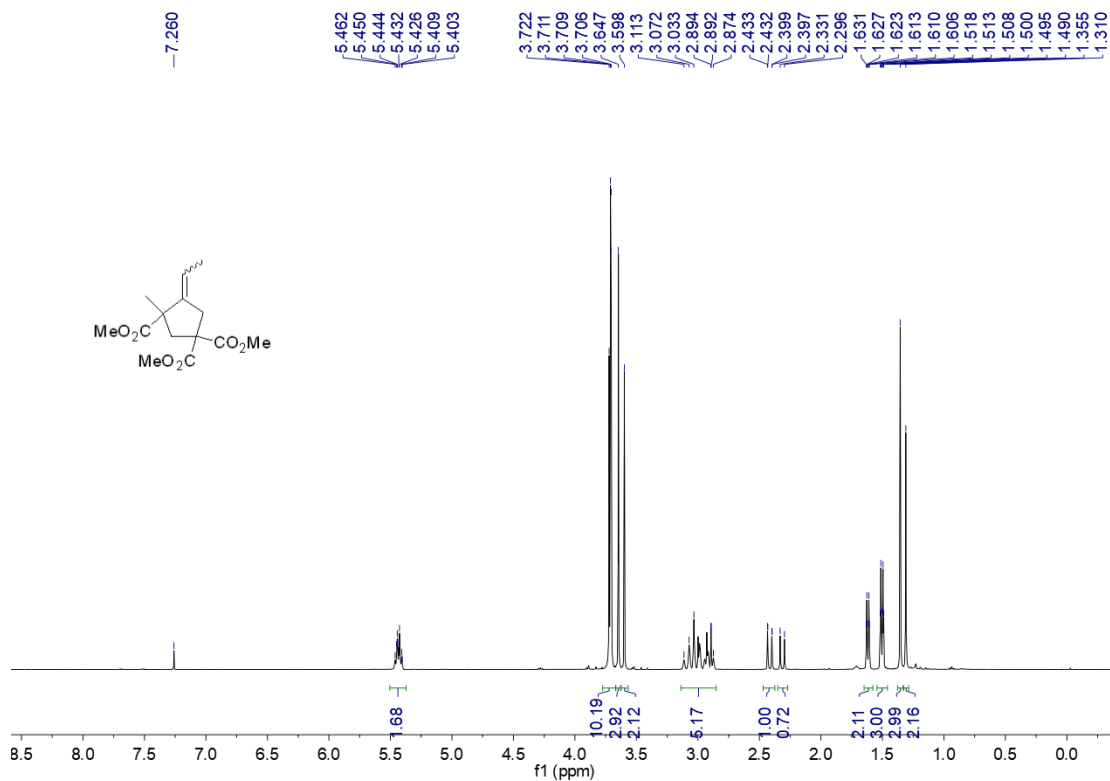

<sup>13</sup>C NMR (CDCl<sub>3</sub>, 101 MHz)

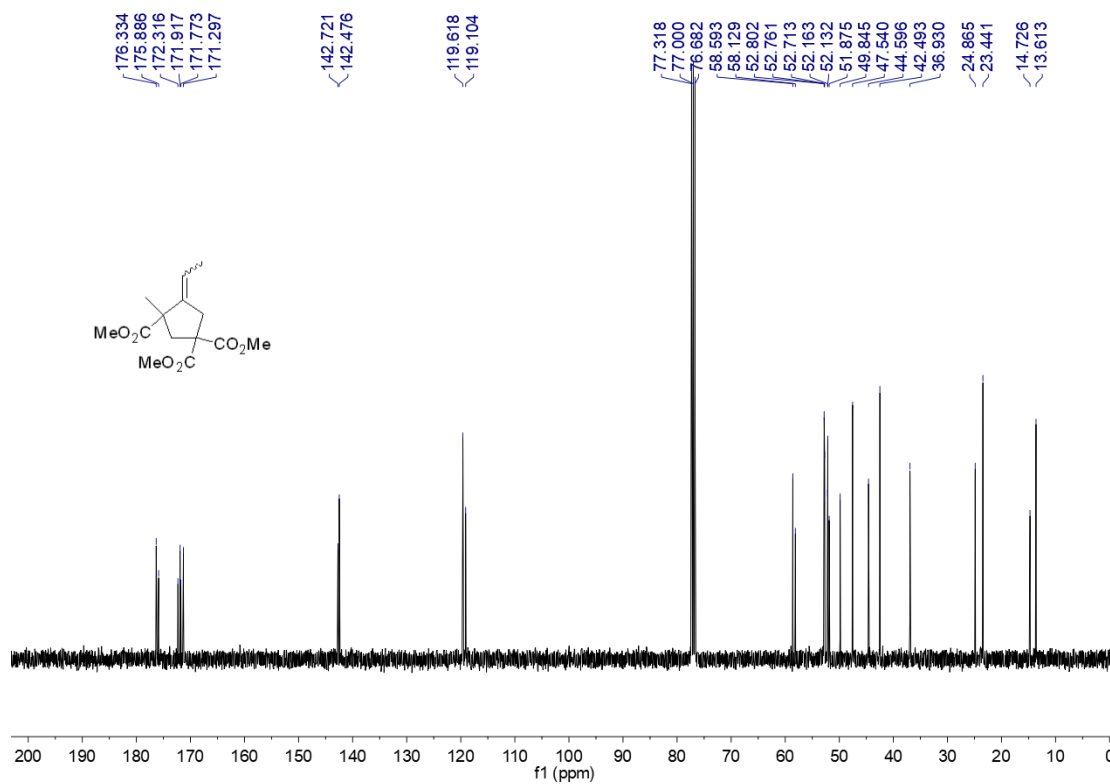

(4w)

$^1\text{H NMR}$  ( $\text{CDCl}_3$ , 400 MHz)

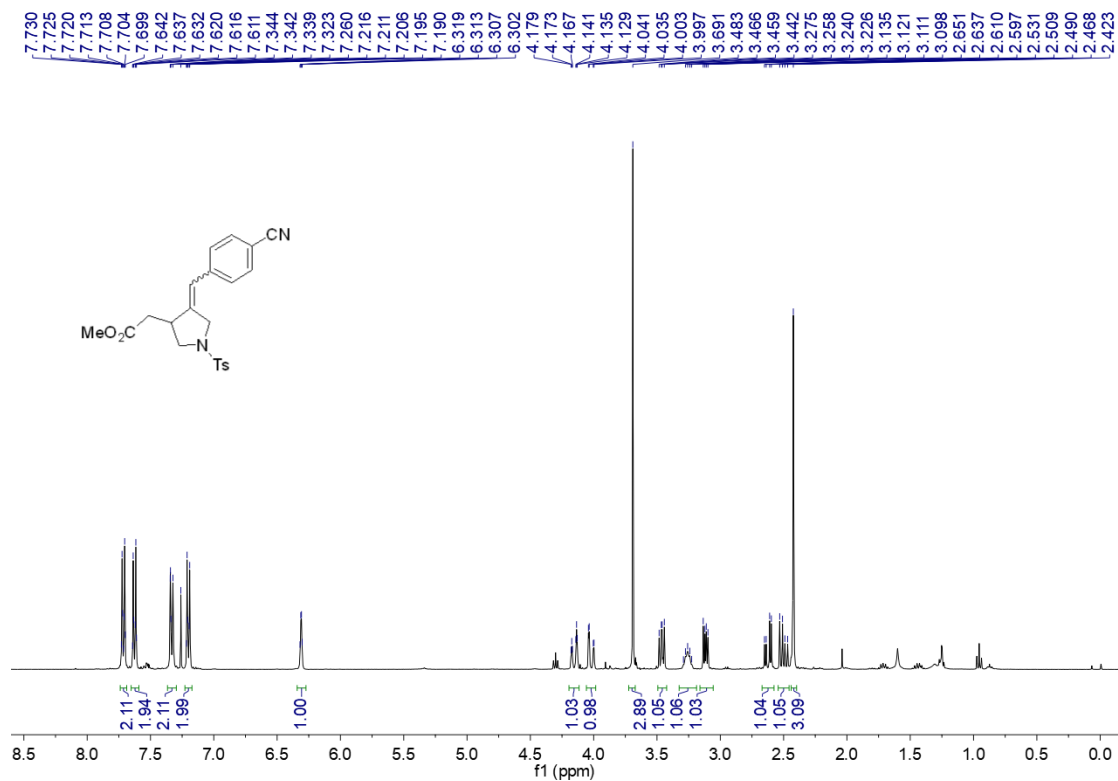

$^{13}\text{C NMR}$  ( $\text{CDCl}_3$ , 101 MHz)

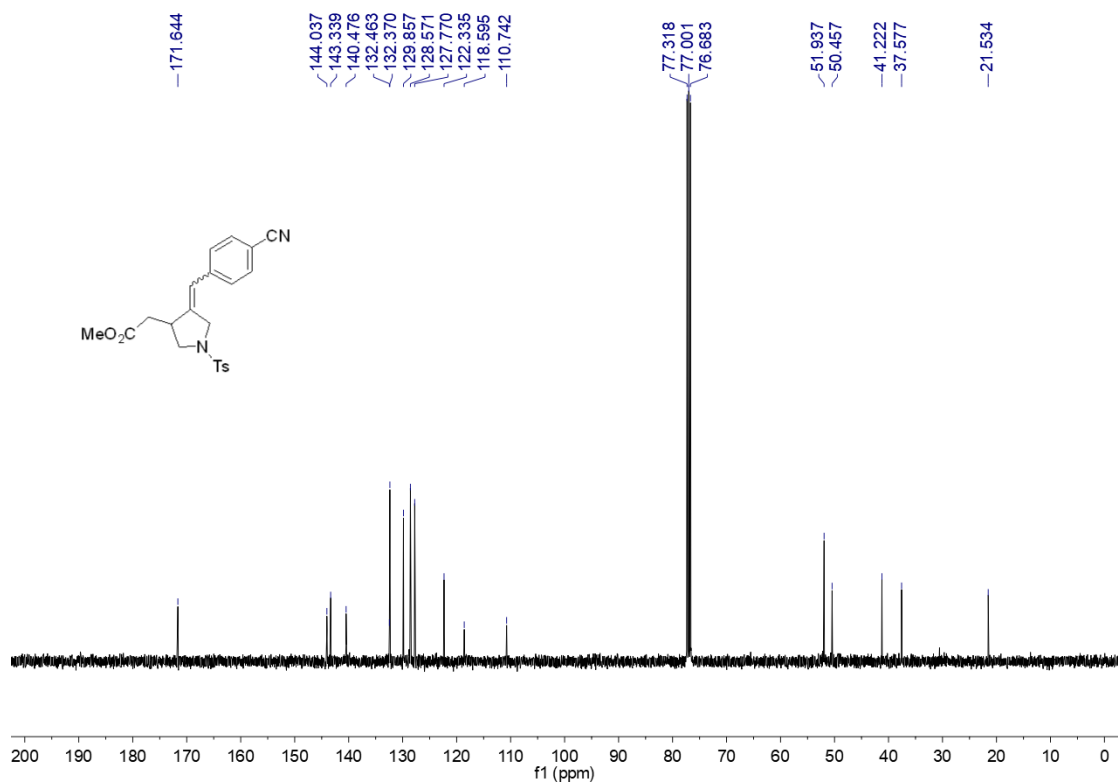

Supplement: d4qo00311j1.pdf [file d4qo00311j1.pdf]
